# Supplementary material for: Hemodynamic, Surgical and Oncological Outcomes of 40 Distal Pancreatectomies with Celiac and Left Gastric Arteries Resection (DP CAR) without Arterial Reconstructions and Preoperative Embolization
Source: MDPI journal article supplement (doi:10.3390/cancers14051254), 2022-02-28

File S1. Statistics. Part 1. Pancreatic ductal adenocarcinoma patients' survival. Frequencies

|       |       | Gender    |         |               |                    |
|-------|-------|-----------|---------|---------------|--------------------|
|       |       | Frequency | Percent | Valid Percent | Cumulative Percent |
| Valid | f     | 16        | 51.6    | 51.6          | 51.6               |
|       | m     | 15        | 48.4    | 48.4          | 100.0              |
|       | Total | 31        | 100.0   | 100.0         |                    |

| Additional artery resection |       |           |         |               |                       |
|-----------------------------|-------|-----------|---------|---------------|-----------------------|
|                             |       | Frequency | Percent | Valid Percent | Cumulative<br>Percent |
| Valid                       | no    | 23        | 74.2    | 74.2          | 74.2                  |
|                             | yes   | 8         | 25.8    | 25.8          | 100.0                 |
|                             | Total | 31        | 100.0   | 100.0         |                       |

|       |       | NA Chemo  |         |               |                    |
|-------|-------|-----------|---------|---------------|--------------------|
|       |       | Frequency | Percent | Valid Percent | Cumulative Percent |
| Valid | no    | 13        | 41.9    | 41.9          | 41.9               |
|       | yes   | 18        | 58.1    | 58.1          | 100.0              |
|       | Total | 31        | 100.0   | 100.0         |                    |

|       |       | Adj Chemo |         |               |                    |
|-------|-------|-----------|---------|---------------|--------------------|
|       |       | Frequency | Percent | Valid Percent | Cumulative Percent |
| Valid | no    | 2         | 6.5     | 6.5           | 6.5                |
|       | yes   | 29        | 93.5    | 93.5          | 100.0              |
|       | Total | 31        | 100.0   | 100.0         |                    |

| Portal vein resection |       |           |         |               |                    |
|-----------------------|-------|-----------|---------|---------------|--------------------|
|                       |       | Frequency | Percent | Valid Percent | Cumulative Percent |
| Valid                 | no    | 19        | 61.3    | 61.3          | 61.3               |
|                       | yes   | 12        | 38.7    | 38.7          | 100.0              |
|                       | Total | 31        | 100.0   | 100.0         |                    |

| Histologic type. G |   |           |         |               |                       |
|--------------------|---|-----------|---------|---------------|-----------------------|
|                    |   | Frequency | Percent | Valid Percent | Cumulative<br>Percent |
| Valid              | 1 | 5         | 16.1    | 16.1          | 16.1                  |
|                    | 2 | 21        | 67.7    | 67.7          | 83.9                  |

|  |       |    |       |       |       |
|--|-------|----|-------|-------|-------|
|  | 3     | 5  | 16.1  | 16.1  | 100.0 |
|  | Total | 31 | 100.0 | 100.0 |       |

| LN. involved |       |           |         |               |                    |
|--------------|-------|-----------|---------|---------------|--------------------|
|              |       | Frequency | Percent | Valid Percent | Cumulative Percent |
| Valid        | 0     | 7         | 22.6    | 22.6          | 22.6               |
|              | 1     | 6         | 19.4    | 19.4          | 41.9               |
|              | 2     | 4         | 12.9    | 12.9          | 54.8               |
|              | 3     | 7         | 22.6    | 22.6          | 77.4               |
|              | 4     | 3         | 9.7     | 9.7           | 87.1               |
|              | 5     | 2         | 6.5     | 6.5           | 93.5               |
|              | 6     | 2         | 6.5     | 6.5           | 100.0              |
|              | Total | 31        | 100.0   | 100.0         |                    |

| Perineural invasion |       |           |         |               |                    |
|---------------------|-------|-----------|---------|---------------|--------------------|
|                     |       | Frequency | Percent | Valid Percent | Cumulative Percent |
| Valid               | no    | 7         | 22.6    | 22.6          | 22.6               |
|                     | yes   | 24        | 77.4    | 77.4          | 100.0              |
|                     | Total | 31        | 100.0   | 100.0         |                    |

| R-status |       |           |         |               |                    |
|----------|-------|-----------|---------|---------------|--------------------|
|          |       | Frequency | Percent | Valid Percent | Cumulative Percent |
| Valid    | no    | 28        | 90.3    | 90.3          | 90.3               |
|          | yes   | 3         | 9.7     | 9.7           | 100.0              |
|          | Total | 31        | 100.0   | 100.0         |                    |

| Alive |       |           |         |               |                    |
|-------|-------|-----------|---------|---------------|--------------------|
|       |       | Frequency | Percent | Valid Percent | Cumulative Percent |
| Valid | dead  | 20        | 64.5    | 64.5          | 64.5               |
|       | alive | 11        | 35.5    | 35.5          | 100.0              |
|       | Total | 31        | 100.0   | 100.0         |                    |

| Progression |    |           |         |               |                    |
|-------------|----|-----------|---------|---------------|--------------------|
|             |    | Frequency | Percent | Valid Percent | Cumulative Percent |
| Valid       | no | 8         | 25.8    | 25.8          | 25.8               |

|       |    |       |       |       |
|-------|----|-------|-------|-------|
| yes   | 23 | 74.2  | 74.2  | 100.0 |
| Total | 31 | 100.0 | 100.0 |       |

| Regression grade |           |         |               |                    |
|------------------|-----------|---------|---------------|--------------------|
|                  | Frequency | Percent | Valid Percent | Cumulative Percent |
| Valid            | 0         | 1       | 3.2           | 5.0                |
|                  | 1         | 1       | 3.2           | 10.0               |
|                  | 2         | 9       | 29.0          | 55.0               |
|                  | 3         | 9       | 29.0          | 100.0              |
|                  | Total     | 20      | 64.5          | 100.0              |
| Missing          | System    | 11      | 35.5          |                    |
| Total            |           | 31      | 100.0         |                    |

| Dindo-C |           |         |               |                    |
|---------|-----------|---------|---------------|--------------------|
|         | Frequency | Percent | Valid Percent | Cumulative Percent |
| Valid   | 0         | 22      | 71.0          | 71.0               |
|         | 1         | 3       | 9.7           | 80.6               |
|         | 2         | 5       | 16.1          | 96.8               |
|         | 3         | 1       | 3.2           | 100.0              |
|         | Total     | 31      | 100.0         |                    |

#### Frequencies

|                                 |                  |
|---------------------------------|------------------|
| BMI                             | 22.016 ±3.0591   |
| CA 19-9 before CT               | 292 [112;551]    |
| CA 19-9 after CT (18)           | 45[19;67.5]      |
| CA 19-9 before CT/after CT (18) | 8.94 [5.04;15.9] |
| LN all                          | 30.87±4.463      |
| Time of follow up. months       | 27 [22;39]       |

|                       | Statistics |             |         |                   |             |             |             |         |         |
|-----------------------|------------|-------------|---------|-------------------|-------------|-------------|-------------|---------|---------|
|                       | N          |             |         |                   |             |             | Percentiles |         |         |
|                       | Valid      | Missin<br>g | Mean    | Std.<br>Deviation | Minimu<br>m | Maximu<br>m | 25          | 50      | 75      |
| BMI                   | 31         | 0           | 22.016  | 3.0591            | 18.0        | 29.5        | 19.500      | 21.000  | 25.000  |
| Age                   | 31         | 0           | 61.55   | 7.924             | 39          | 73          | 59.00       | 64.00   | 66.00   |
| CA 19-9 before CT     | 31         | 0           | 352.497 | 266.6493          | .4          | 1145.0      | 112.000     | 292.000 | 551.000 |
| CA 19-9 after CT (18) | 18         | 13          | 50.94   | 40.473            | 14          | 144         | 19.00       | 45.00   | 67.50   |

|                    |        |        |    |    |         |         |      |       |        |        |         |
|--------------------|--------|--------|----|----|---------|---------|------|-------|--------|--------|---------|
| CA                 | 19-9   | before | 18 | 13 | 11.4550 | 7.35294 | 1.80 | 29.32 | 5.0475 | 8.9400 | 15.9050 |
| CT/after CT        |        |        |    |    |         |         |      |       |        |        |         |
| LN                 | all    |        | 31 | 0  | 30.87   | 4.463   | 22   | 43    | 28.00  | 31.00  | 33.00   |
| OS                 | months |        | 31 | 0  | 34.58   | 27.629  | 6    | 139   | 20.00  | 25.00  | 39.00   |
| PFS                | months |        | 31 | 0  | 25.84   | 27.407  | 4    | 139   | 13.00  | 17.00  | 21.00   |
| Time of follow up. |        |        | 31 | 0  | 35.97   | 27.384  | 11   | 140   | 22.00  | 27.00  | 39.00   |
| months             |        |        |    |    |         |         |      |       |        |        |         |

Mean±SD 62±8 лет

Median [Q1;Q3] 292 [112;551]

Histogram

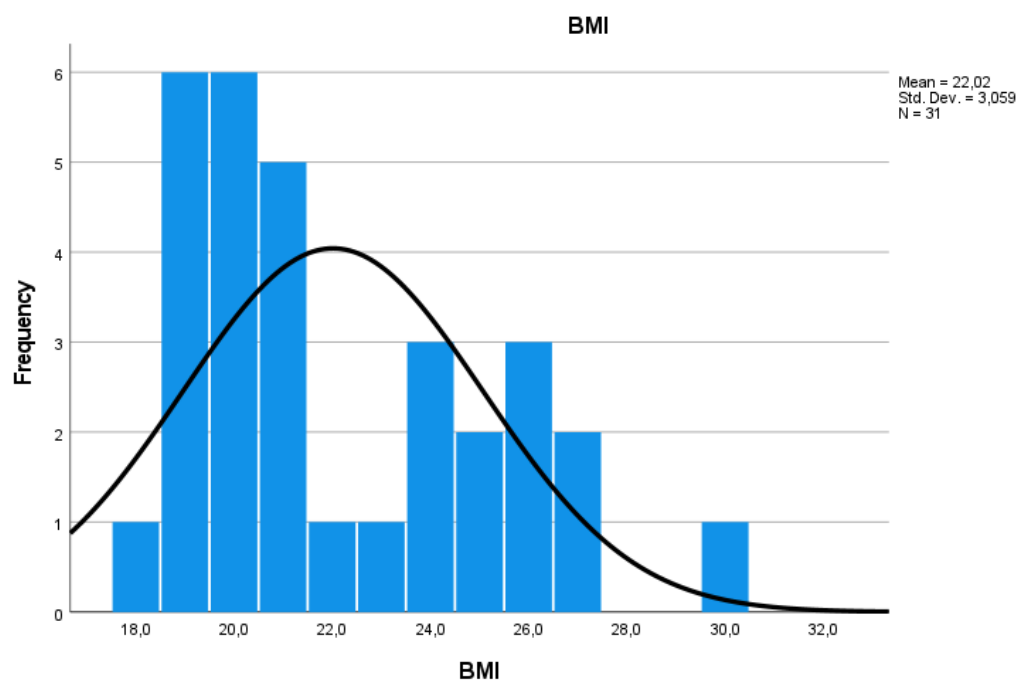

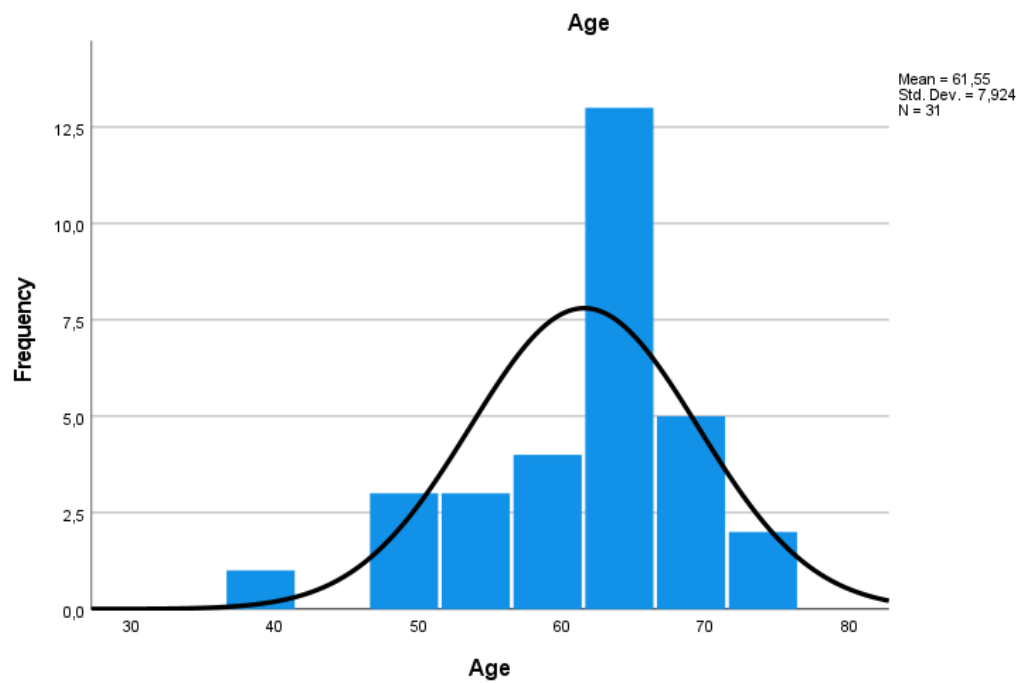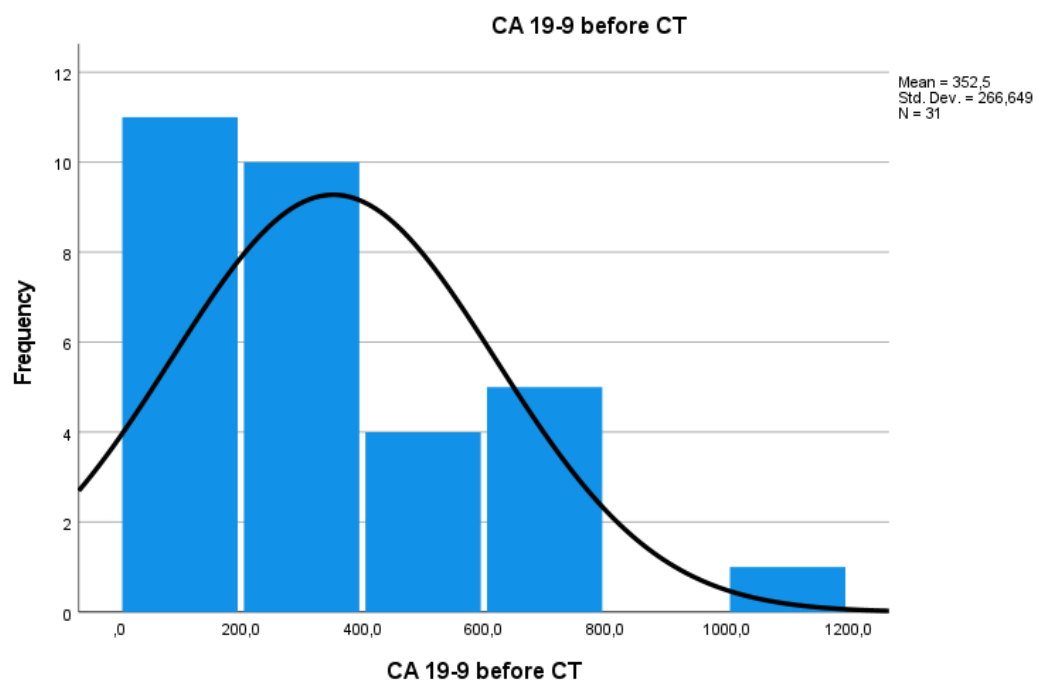

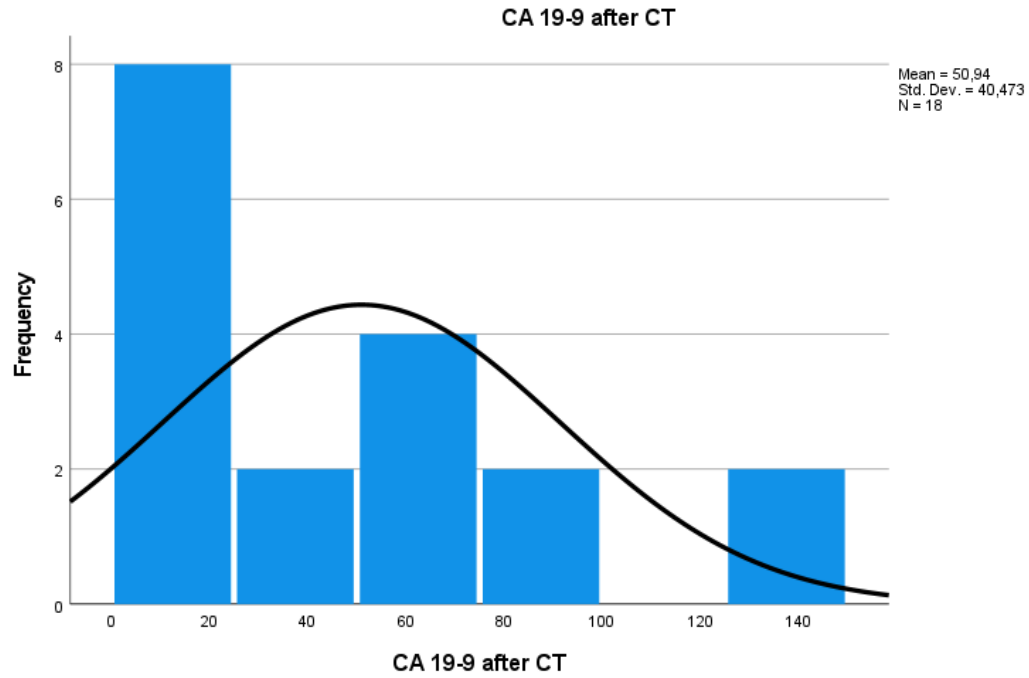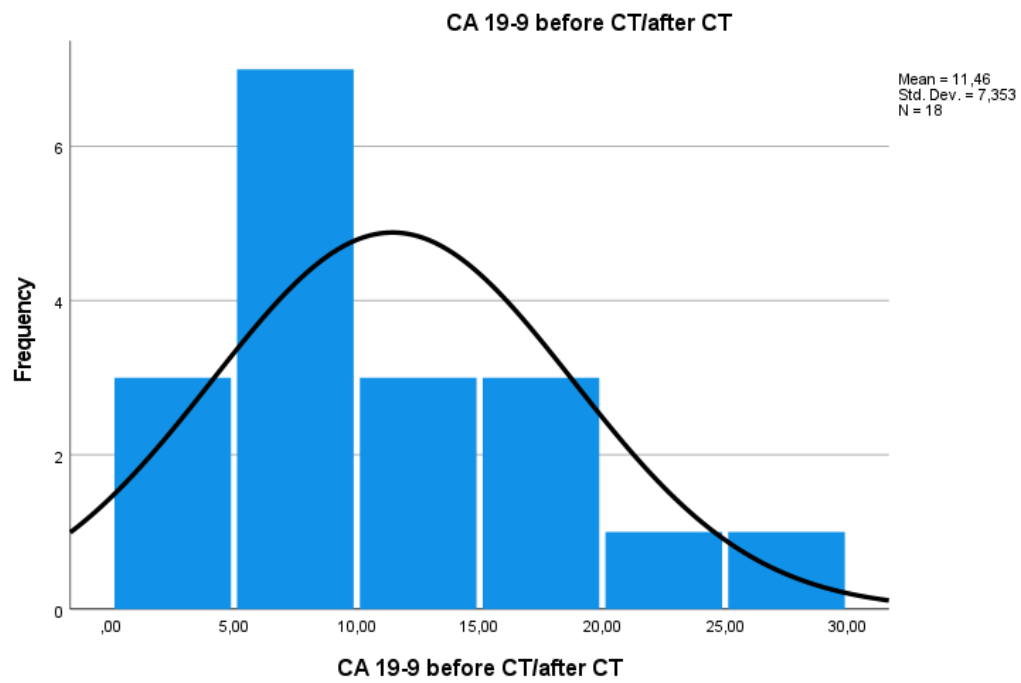

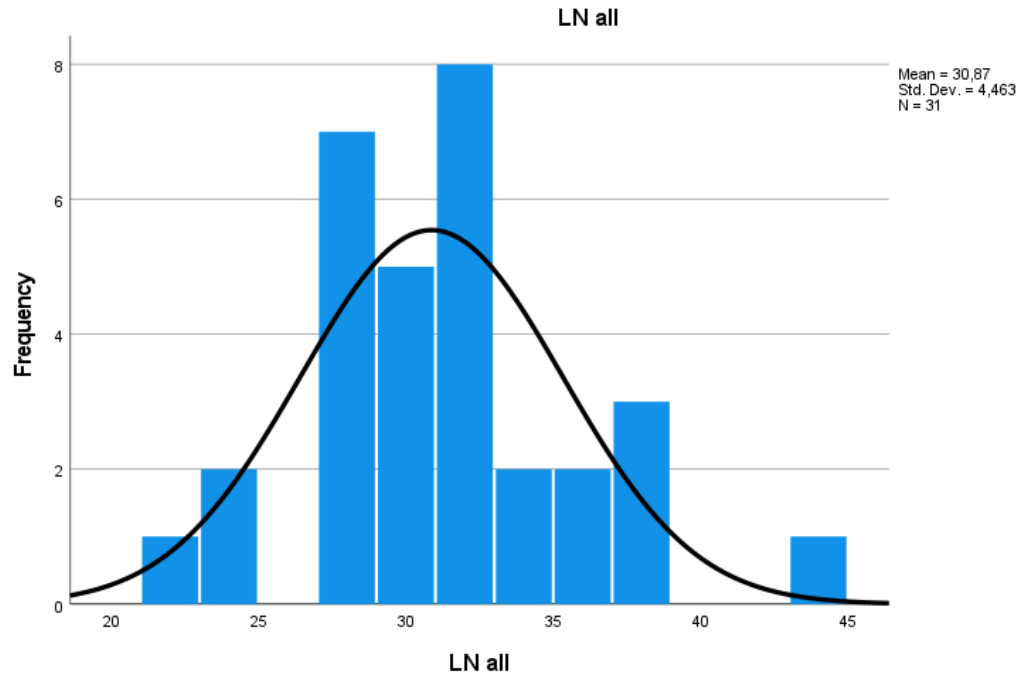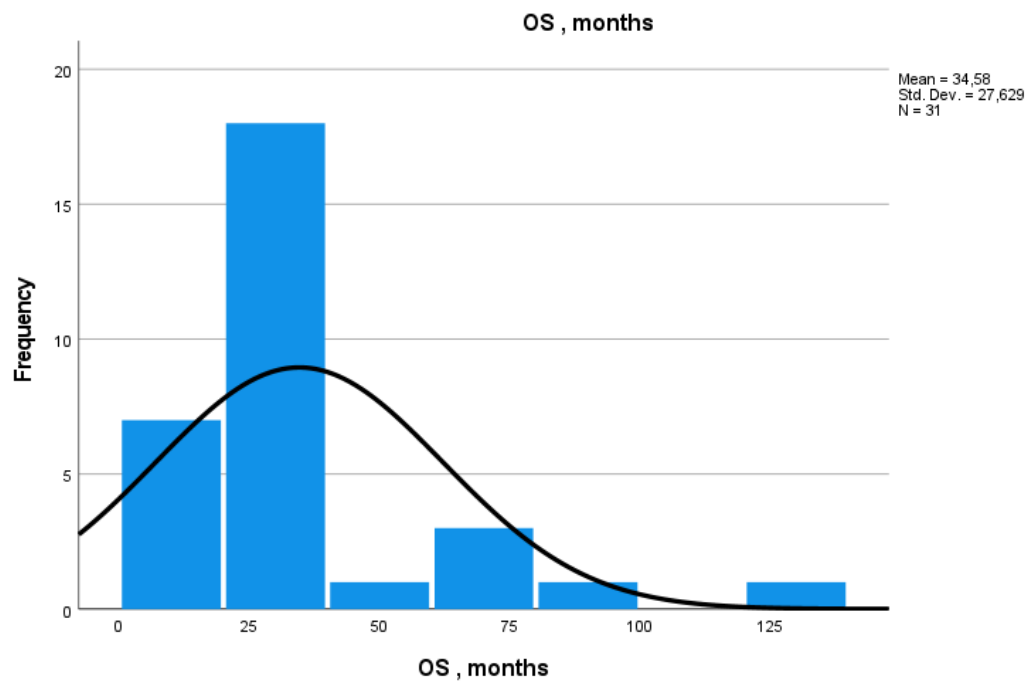

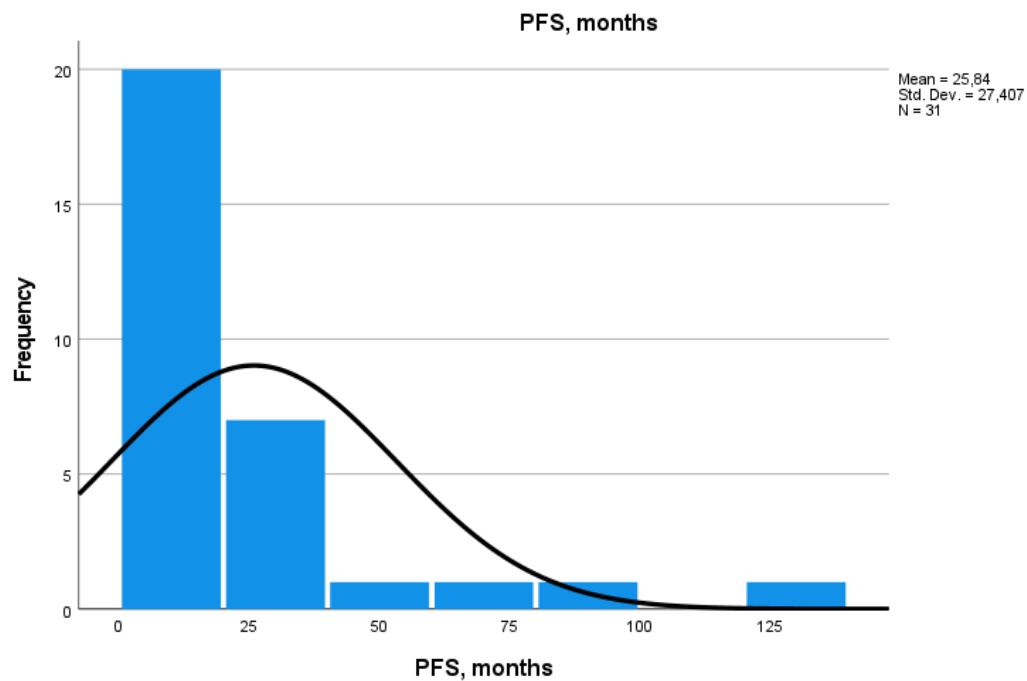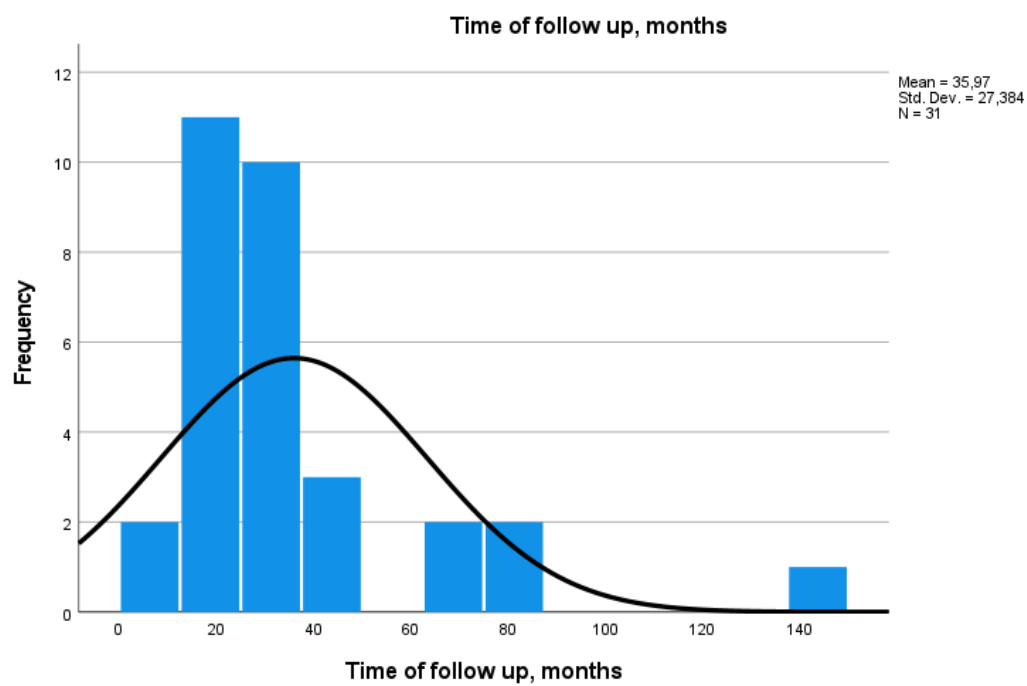

Overall survival and analysis of factors influencing it  
Kaplan-Meier

| Case Processing Summary |             |          |         |
|-------------------------|-------------|----------|---------|
| Total N                 | N of Events | Censored |         |
|                         |             | N        | Percent |
| 31                      | 20          | 11       | 35.5%   |

Survival Table



|    | Time    | Status | Cumulative Proportion Surviving<br>at the Time |            | N of<br>Cumulative<br>Events | N of Remaining<br>Cases |
|----|---------|--------|------------------------------------------------|------------|------------------------------|-------------------------|
|    |         |        | Estimate                                       | Std. Error |                              |                         |
| 1  | 6.000   | dead   | .968                                           | .032       | 1                            | 30                      |
| 2  | 11.000  | dead   | .935                                           | .044       | 2                            | 29                      |
| 3  | 13.000  | dead   | .                                              | .          | 3                            | 28                      |
| 4  | 13.000  | dead   | .871                                           | .060       | 4                            | 27                      |
| 5  | 14.000  | dead   | .839                                           | .066       | 5                            | 26                      |
| 6  | 17.000  | dead   | .806                                           | .071       | 6                            | 25                      |
| 7  | 19.000  | alive  | .                                              | .          | 6                            | 24                      |
| 8  | 20.000  | dead   | .                                              | .          | 7                            | 23                      |
| 9  | 20.000  | dead   | .739                                           | .079       | 8                            | 22                      |
| 10 | 21.000  | dead   | .                                              | .          | 9                            | 21                      |
| 11 | 21.000  | dead   | .672                                           | .085       | 10                           | 20                      |
| 12 | 21.000  | alive  | .                                              | .          | 10                           | 19                      |
| 13 | 22.000  | dead   | .637                                           | .088       | 11                           | 18                      |
| 14 | 24.000  | dead   | .601                                           | .090       | 12                           | 17                      |
| 15 | 25.000  | dead   | .                                              | .          | 13                           | 16                      |
| 16 | 25.000  | dead   | .531                                           | .092       | 14                           | 15                      |
| 17 | 29.000  | dead   | .495                                           | .092       | 15                           | 14                      |
| 18 | 29.000  | alive  | .                                              | .          | 15                           | 13                      |
| 19 | 29.000  | alive  | .                                              | .          | 15                           | 12                      |
| 20 | 30.000  | dead   | .454                                           | .094       | 16                           | 11                      |
| 21 | 31.000  | alive  | .                                              | .          | 16                           | 10                      |
| 22 | 32.000  | alive  | .                                              | .          | 16                           | 9                       |
| 23 | 33.000  | alive  | .                                              | .          | 16                           | 8                       |
| 24 | 39.000  | dead   | .397                                           | .098       | 17                           | 7                       |
| 25 | 39.000  | alive  | .                                              | .          | 17                           | 6                       |
| 26 | 48.000  | dead   | .331                                           | .101       | 18                           | 5                       |
| 27 | 66.000  | dead   | .265                                           | .100       | 19                           | 4                       |
| 28 | 71.000  | dead   | .199                                           | .095       | 20                           | 3                       |
| 29 | 79.000  | alive  | .                                              | .          | 20                           | 2                       |
| 30 | 86.000  | alive  | .                                              | .          | 20                           | 1                       |
| 31 | 139.000 | alive  | .                                              | .          | 20                           | 0                       |

#### Means and Medians for Overall Survival Time

|              |                       |  |  |
|--------------|-----------------------|--|--|
| 29.000±6.795 | [95%CI:15.681;42.319] |  |  |
|--------------|-----------------------|--|--|

#### Means and Medians for Survival Time

Mean

Median

| Estimate | Std. Error | 95% Confidence Interval |             | Estimate | Std. Error | 95% Confidence Interval |             |
|----------|------------|-------------------------|-------------|----------|------------|-------------------------|-------------|
|          |            | Lower Bound             | Upper Bound |          |            | Lower Bound             | Upper Bound |
| 52.865   | 9.885      | 33.490                  | 72.240      | 29.000   | 6.795      | 15.681                  | 42.319      |

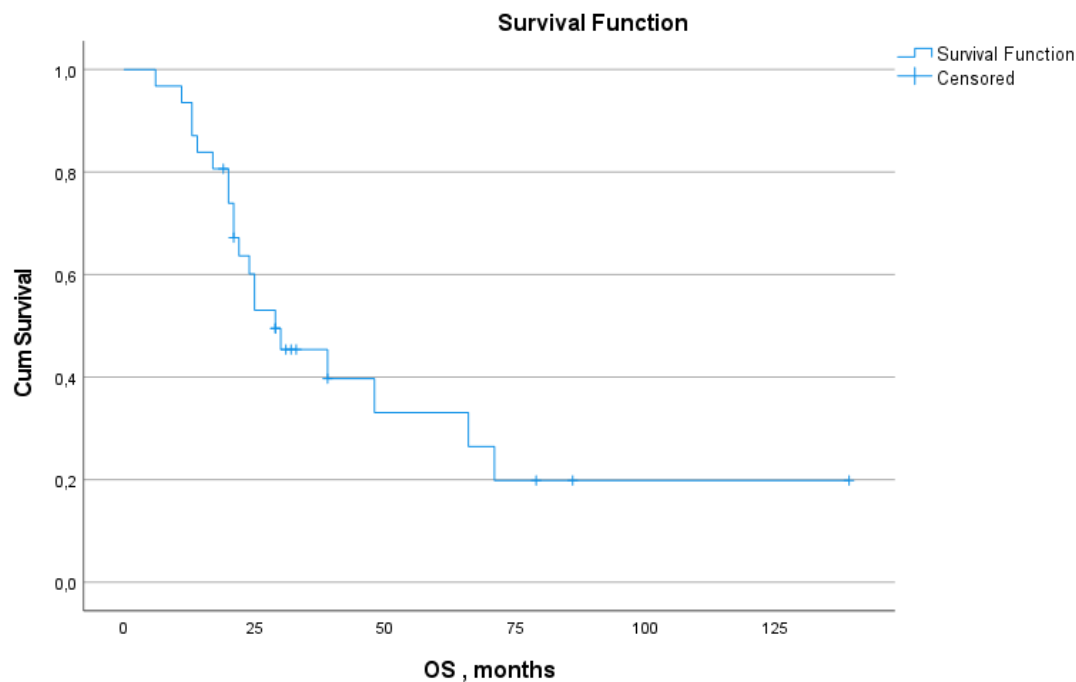

Kaplan-Meier

#### Case Processing Summary

| Gender  | Total N | N of Events | Censored |         |
|---------|---------|-------------|----------|---------|
|         |         |             | N        | Percent |
| f       | 16      | 12          | 4        | 25.0%   |
| m       | 15      | 8           | 7        | 46.7%   |
| Overall | 31      | 20          | 11       | 35.5%   |

#### Survival Table

| Survival Table |      |        |                                                |            |                              |                         |    |
|----------------|------|--------|------------------------------------------------|------------|------------------------------|-------------------------|----|
|                |      |        | Cumulative Proportion<br>Surviving at the Time |            | N of<br>Cumulative<br>Events | N of Remaining<br>Cases |    |
| Gender         | Time | Status | Estimate                                       | Std. Error |                              |                         |    |
| f              | 1    | 6.000  | dead                                           | .938       | .061                         | 1                       | 15 |
|                | 2    | 13.000 | dead                                           | .875       | .083                         | 2                       | 14 |
|                | 3    | 14.000 | dead                                           | .813       | .098                         | 3                       | 13 |
|                | 4    | 19.000 | alive                                          | .          | .                            | 3                       | 12 |
|                | 5    | 22.000 | dead                                           | .745       | .110                         | 4                       | 11 |
|                | 6    | 25.000 | dead                                           | .          | .                            | 5                       | 10 |
|                | 7    | 25.000 | dead                                           | .609       | .125                         | 6                       | 9  |
|                | 8    | 29.000 | dead                                           | .542       | .128                         | 7                       | 8  |

|   |    |         |       |      |      |    |    |
|---|----|---------|-------|------|------|----|----|
| m | 9  | 29.000  | alive | .    | .    | 7  | 7  |
|   | 10 | 30.000  | dead  | .464 | .131 | 8  | 6  |
|   | 11 | 32.000  | alive | .    | .    | 8  | 5  |
|   | 12 | 39.000  | dead  | .371 | .134 | 9  | 4  |
|   | 13 | 48.000  | dead  | .279 | .129 | 10 | 3  |
|   | 14 | 66.000  | dead  | .186 | .114 | 11 | 2  |
|   | 15 | 71.000  | dead  | .093 | .087 | 12 | 1  |
|   | 16 | 139.000 | alive | .    | .    | 12 | 0  |
|   | 1  | 11.000  | dead  | .933 | .064 | 1  | 14 |
|   | 2  | 13.000  | dead  | .867 | .088 | 2  | 13 |
|   | 3  | 17.000  | dead  | .800 | .103 | 3  | 12 |
|   | 4  | 20.000  | dead  | .    | .    | 4  | 11 |
|   | 5  | 20.000  | dead  | .667 | .122 | 5  | 10 |
|   | 6  | 21.000  | dead  | .    | .    | 6  | 9  |
|   | 7  | 21.000  | dead  | .533 | .129 | 7  | 8  |
|   | 8  | 21.000  | alive | .    | .    | 7  | 7  |
|   | 9  | 24.000  | dead  | .457 | .131 | 8  | 6  |
|   | 10 | 29.000  | alive | .    | .    | 8  | 5  |
|   | 11 | 31.000  | alive | .    | .    | 8  | 4  |
|   | 12 | 33.000  | alive | .    | .    | 8  | 3  |
|   | 13 | 39.000  | alive | .    | .    | 8  | 2  |
|   | 14 | 79.000  | alive | .    | .    | 8  | 1  |
|   | 15 | 86.000  | alive | .    | .    | 8  | 0  |

**Means and Medians for Survival Time m-f .739**

| Means and Medians for Survival Time in T103 |          |        |        |        |                         |       |        |        |
|---------------------------------------------|----------|--------|--------|--------|-------------------------|-------|--------|--------|
| Mean                                        |          |        |        |        | Median                  |       |        |        |
| 95% Confidence Interval                     |          |        |        |        | 95% Confidence Interval |       |        |        |
|                                             |          | Std.   | Lower  | Upper  |                         | Std.  | Lower  | Upper  |
| Gender                                      | Estimate | Error  | Bound  | Bound  | Estimate                | Error | Bound  | Bound  |
| f                                           | 44.930   | 10.018 | 25.294 | 64.565 | 30.000                  | 7.722 | 14.866 | 45.134 |
| m                                           | 49.343   | 8.857  | 31.982 | 66.703 | 24.000                  | .     | .      | .      |
| Overall                                     | 52.865   | 9.885  | 33.490 | 72.240 | 29.000                  | 6.795 | 15.681 | 42.319 |

**Overall Comparisons**

|                       | Chi-Square | df | Sig. |
|-----------------------|------------|----|------|
| Log Rank (Mantel-Cox) | .111       | 1  | .739 |

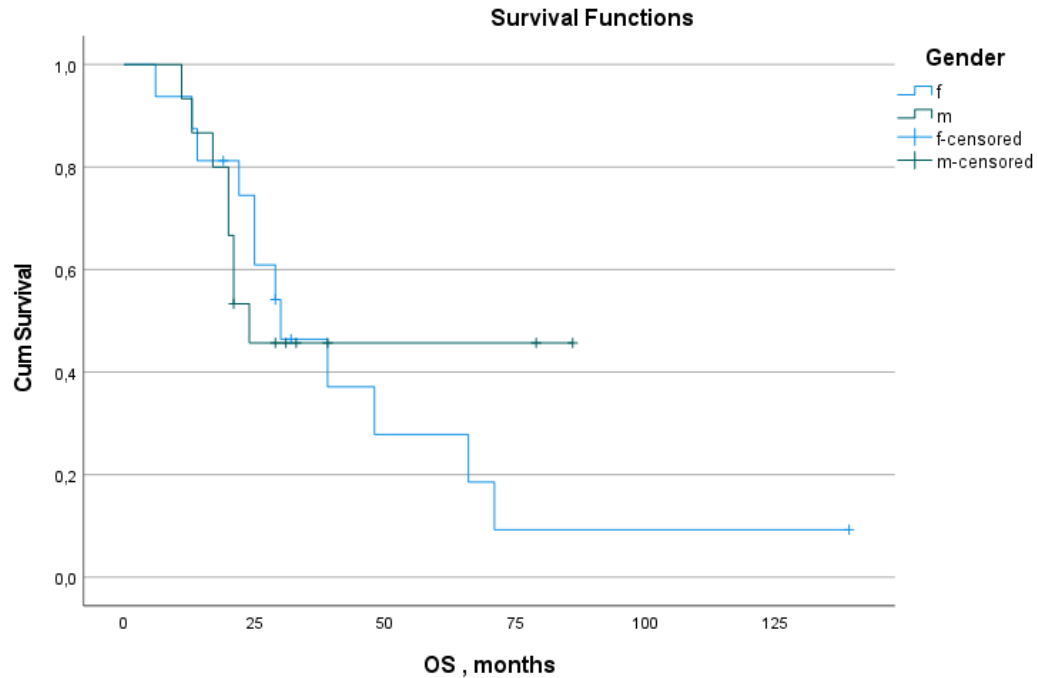

Kaplan-Meier

**Case Processing Summary**

| Additional artery resection | Total N | N of Events | Censored |         |
|-----------------------------|---------|-------------|----------|---------|
|                             |         |             | N        | Percent |
| no                          | 23      | 15          | 8        | 34.8%   |
| yes                         | 8       | 5           | 3        | 37.5%   |
| Overall                     | 31      | 20          | 11       | 35.5%   |

**Survival Table**

| Additional resection | artery | Time   | Status | Cumulative Proportion Surviving at the Time |            | N of Cumulative Events | N of Remaining Cases |
|----------------------|--------|--------|--------|---------------------------------------------|------------|------------------------|----------------------|
|                      |        |        |        | Estimate                                    | Std. Error |                        |                      |
| no                   | 1      | 6.000  | dead   | .957                                        | .043       | 1                      | 22                   |
|                      | 2      | 11.000 | dead   | .913                                        | .059       | 2                      | 21                   |
|                      | 3      | 13.000 | dead   | .                                           | .          | 3                      | 20                   |
|                      | 4      | 13.000 | dead   | .826                                        | .079       | 4                      | 19                   |
|                      | 5      | 14.000 | dead   | .783                                        | .086       | 5                      | 18                   |
|                      | 6      | 19.000 | alive  | .                                           | .          | 5                      | 17                   |
|                      | 7      | 20.000 | dead   | .737                                        | .092       | 6                      | 16                   |
|                      | 8      | 21.000 | dead   | .                                           | .          | 7                      | 15                   |
|                      | 9      | 21.000 | dead   | .645                                        | .101       | 8                      | 14                   |
|                      | 10     | 22.000 | dead   | .598                                        | .104       | 9                      | 13                   |
|                      | 11     | 25.000 | dead   | .                                           | .          | 10                     | 12                   |
|                      | 12     | 25.000 | dead   | .506                                        | .106       | 11                     | 11                   |

|     |    |         |       |      |      |    |    |
|-----|----|---------|-------|------|------|----|----|
|     | 13 | 29.000  | alive | .    | .    | 11 | 10 |
|     | 14 | 29.000  | alive | .    | .    | 11 | 9  |
|     | 15 | 30.000  | dead  | .450 | .108 | 12 | 8  |
|     | 16 | 31.000  | alive | .    | .    | 12 | 7  |
|     | 17 | 32.000  | alive | .    | .    | 12 | 6  |
|     | 18 | 33.000  | alive | .    | .    | 12 | 5  |
|     | 19 | 48.000  | dead  | .360 | .118 | 13 | 4  |
|     | 20 | 66.000  | dead  | .270 | .118 | 14 | 3  |
|     | 21 | 71.000  | dead  | .180 | .108 | 15 | 2  |
|     | 22 | 79.000  | alive | .    | .    | 15 | 1  |
|     | 23 | 86.000  | alive | .    | .    | 15 | 0  |
| yes | 1  | 17.000  | dead  | .875 | .117 | 1  | 7  |
|     | 2  | 20.000  | dead  | .750 | .153 | 2  | 6  |
|     | 3  | 21.000  | alive | .    | .    | 2  | 5  |
|     | 4  | 24.000  | dead  | .600 | .182 | 3  | 4  |
|     | 5  | 29.000  | dead  | .450 | .188 | 4  | 3  |
|     | 6  | 39.000  | dead  | .300 | .175 | 5  | 2  |
|     | 7  | 39.000  | alive | .    | .    | 5  | 1  |
|     | 8  | 139.000 | alive | .    | .    | 5  | 0  |

Additional artery resection **Means and Medians for Survival Time**

| Additional<br>resection | artery | Mean     |               |                            |                | Median   |               |                            |                |
|-------------------------|--------|----------|---------------|----------------------------|----------------|----------|---------------|----------------------------|----------------|
|                         |        | Estimate | Std.<br>Error | 95% Confidence<br>Interval |                | Estimate | Std.<br>Error | 95% Confidence<br>Interval |                |
|                         |        |          |               | Lower<br>Bound             | Upper<br>Bound |          |               | Lower<br>Bound             | Upper<br>Bound |
| no                      |        | 42.474   | 6.404         | 29.922                     | 55.026         | 30.000   | 11.830        | 6.814                      | 53.186         |
| yes                     |        | 60.125   | 19.793        | 21.331                     | 98.919         | 29.000   | 6.275         | 16.701                     | 41.299         |
| Overall                 |        | 52.865   | 9.885         | 33.490                     | 72.240         | 29.000   | 6.795         | 15.681                     | 42.319         |

**Overall Comparisons**

|                       | Chi-Square | df | Sig. |
|-----------------------|------------|----|------|
| Log Rank (Mantel-Cox) | .028       | 1  | .866 |

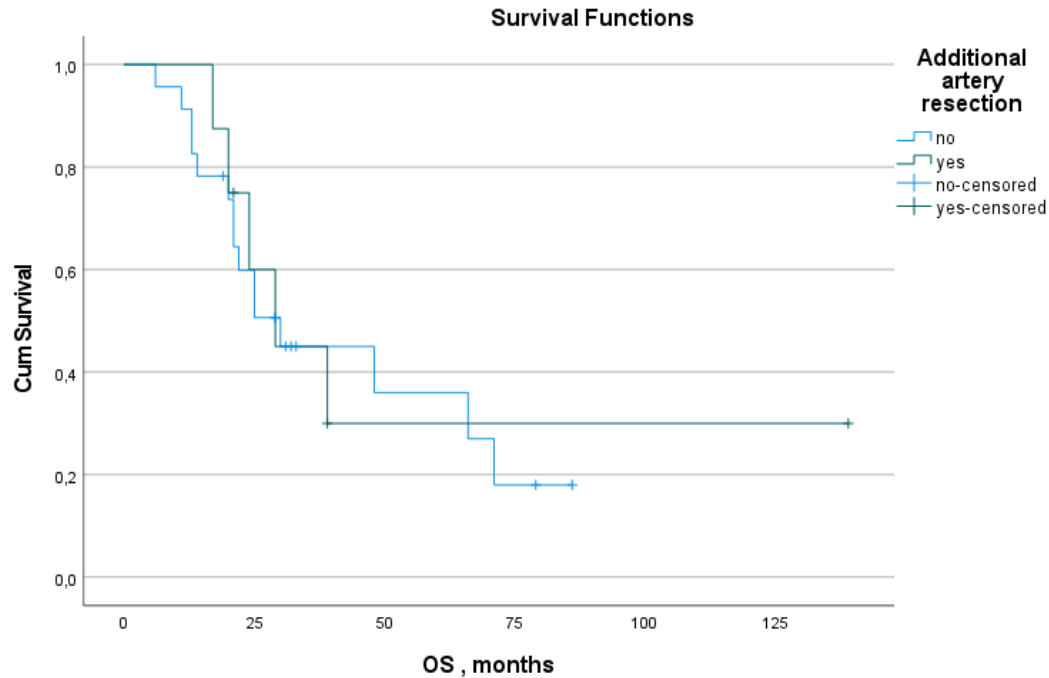

Kaplan-Meier

**Case Processing Summary**

| NA Chemo | Total N | N of Events | Censored |         |
|----------|---------|-------------|----------|---------|
|          |         |             | N        | Percent |
| no       | 13      | 10          | 3        | 23.1%   |
| yes      | 18      | 10          | 8        | 44.4%   |
| Overall  | 31      | 20          | 11       | 35.5%   |

**Survival Table**

| NA Chemo |    | Time   | Status | Cumulative Proportion<br>Surviving at the Time |            | N of<br>Cumulative<br>Events | N of Remaining<br>Cases |
|----------|----|--------|--------|------------------------------------------------|------------|------------------------------|-------------------------|
|          |    |        |        | Estimate                                       | Std. Error |                              |                         |
| no       | 1  | 6.000  | dead   | .923                                           | .074       | 1                            | 12                      |
|          | 2  | 11.000 | dead   | .846                                           | .100       | 2                            | 11                      |
|          | 3  | 13.000 | dead   | .                                              | .          | 3                            | 10                      |
|          | 4  | 13.000 | dead   | .692                                           | .128       | 4                            | 9                       |
|          | 5  | 20.000 | dead   | .615                                           | .135       | 5                            | 8                       |
|          | 6  | 21.000 | dead   | .538                                           | .138       | 6                            | 7                       |
|          | 7  | 25.000 | dead   | .462                                           | .138       | 7                            | 6                       |
|          | 8  | 30.000 | dead   | .385                                           | .135       | 8                            | 5                       |
|          | 9  | 33.000 | alive  | .                                              | .          | 8                            | 4                       |
|          | 10 | 39.000 | dead   | .288                                           | .131       | 9                            | 3                       |
|          | 11 | 66.000 | dead   | .192                                           | .117       | 10                           | 2                       |
|          | 12 | 79.000 | alive  | .                                              | .          | 10                           | 1                       |
|          | 13 | 86.000 | alive  | .                                              | .          | 10                           | 0                       |

|     |    |         |       |      |      |    |    |
|-----|----|---------|-------|------|------|----|----|
| yes | 1  | 14.000  | dead  | .944 | .054 | 1  | 17 |
|     | 2  | 17.000  | dead  | .889 | .074 | 2  | 16 |
|     | 3  | 19.000  | alive | .    | .    | 2  | 15 |
|     | 4  | 20.000  | dead  | .830 | .090 | 3  | 14 |
|     | 5  | 21.000  | dead  | .770 | .101 | 4  | 13 |
|     | 6  | 21.000  | alive | .    | .    | 4  | 12 |
|     | 7  | 22.000  | dead  | .706 | .111 | 5  | 11 |
|     | 8  | 24.000  | dead  | .642 | .118 | 6  | 10 |
|     | 9  | 25.000  | dead  | .578 | .123 | 7  | 9  |
|     | 10 | 29.000  | dead  | .514 | .125 | 8  | 8  |
|     | 11 | 29.000  | alive | .    | .    | 8  | 7  |
|     | 12 | 29.000  | alive | .    | .    | 8  | 6  |
|     | 13 | 31.000  | alive | .    | .    | 8  | 5  |
|     | 14 | 32.000  | alive | .    | .    | 8  | 4  |
|     | 15 | 39.000  | alive | .    | .    | 8  | 3  |
|     | 16 | 48.000  | dead  | .342 | .163 | 9  | 2  |
|     | 17 | 71.000  | dead  | .171 | .146 | 10 | 1  |
|     | 18 | 139.000 | alive | .    | .    | 10 | 0  |

**Yes and NO NA chemo Means and Medians for Survival Time** .436 although for No NACHT it was 25 [95%CI:13.26;36.7] and for YES – 48 [95%CI:16.9;42.32]

| NA<br>Chemo | Estimate | Std.<br>Error | Mean<br>95% Confidence Interval |                | Estimate | Std.<br>Error | Median<br>95% Confidence Interval |                |
|-------------|----------|---------------|---------------------------------|----------------|----------|---------------|-----------------------------------|----------------|
|             |          |               | Lower<br>Bound                  | Upper<br>Bound |          |               | Lower<br>Bound                    | Upper<br>Bound |
| no          | 37.327   | 8.086         | 21.479                          | 53.175         | 25.000   | 5.991         | 13.257                            | 36.743         |
| yes         | 54.740   | 13.977        | 27.344                          | 82.135         | 48.000   | 15.888        | 16.860                            | 79.140         |
| Overall     | 52.865   | 9.885         | 33.490                          | 72.240         | 29.000   | 6.795         | 15.681                            | 42.319         |

#### Overall Comparisons

|                       | Chi-Square | df | Sig. |
|-----------------------|------------|----|------|
| Log Rank (Mantel-Cox) | .606       | 1  | .436 |

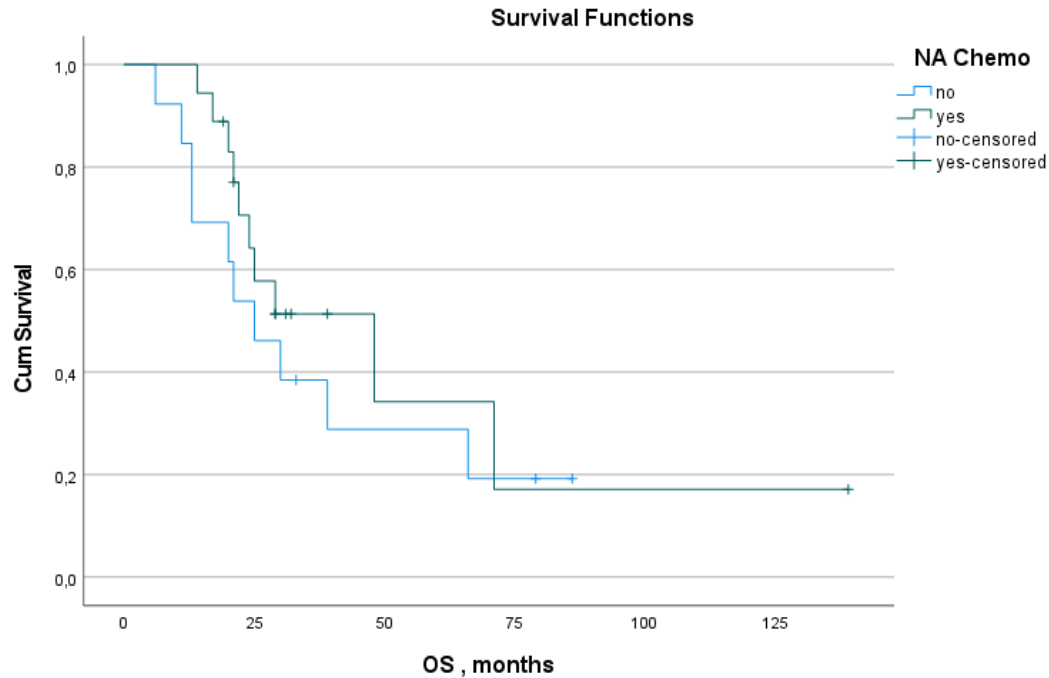

Kaplan-Meier

**Case Processing Summary**

| Adj Chemo | Total N | N of Events | Censored |         |
|-----------|---------|-------------|----------|---------|
|           |         |             | N        | Percent |
| no        | 2       | 1           | 1        | 50.0%   |
| yes       | 29      | 19          | 10       | 34.5%   |
| Overall   | 31      | 20          | 11       | 35.5%   |

**Survival Table**

|           |      |         | Cumulative Proportion<br>Surviving at the Time |            | N of<br>Cumulative<br>Events | N of Remaining<br>Cases |    |
|-----------|------|---------|------------------------------------------------|------------|------------------------------|-------------------------|----|
| Adj Chemo | Time | Status  | Estimate                                       | Std. Error |                              |                         |    |
| no        | 1    | 6.000   | dead                                           | .500       | .354                         | 1                       | 1  |
|           | 2    | 139.000 | alive                                          | .          | .                            | 1                       | 0  |
| yes       | 1    | 11.000  | dead                                           | .966       | .034                         | 1                       | 28 |
|           | 2    | 13.000  | dead                                           | .          | .                            | 2                       | 27 |
|           | 3    | 13.000  | dead                                           | .897       | .057                         | 3                       | 26 |
|           | 4    | 14.000  | dead                                           | .862       | .064                         | 4                       | 25 |
|           | 5    | 17.000  | dead                                           | .828       | .070                         | 5                       | 24 |
|           | 6    | 19.000  | alive                                          | .          | .                            | 5                       | 23 |
|           | 7    | 20.000  | dead                                           | .          | .                            | 6                       | 22 |
|           | 8    | 20.000  | dead                                           | .756       | .080                         | 7                       | 21 |
|           | 9    | 21.000  | dead                                           | .          | .                            | 8                       | 20 |
|           | 10   | 21.000  | dead                                           | .684       | .087                         | 9                       | 19 |



|    |        |       |      |      |    |    |
|----|--------|-------|------|------|----|----|
| 11 | 21.000 | alive | .    | .    | 9  | 18 |
| 12 | 22.000 | dead  | .646 | .090 | 10 | 17 |
| 13 | 24.000 | dead  | .608 | .093 | 11 | 16 |
| 14 | 25.000 | dead  | .    | .    | 12 | 15 |
| 15 | 25.000 | dead  | .532 | .095 | 13 | 14 |
| 16 | 29.000 | dead  | .494 | .096 | 14 | 13 |
| 17 | 29.000 | alive | .    | .    | 14 | 12 |
| 18 | 29.000 | alive | .    | .    | 14 | 11 |
| 19 | 30.000 | dead  | .449 | .097 | 15 | 10 |
| 20 | 31.000 | alive | .    | .    | 15 | 9  |
| 21 | 32.000 | alive | .    | .    | 15 | 8  |
| 22 | 33.000 | alive | .    | .    | 15 | 7  |
| 23 | 39.000 | dead  | .385 | .102 | 16 | 6  |
| 24 | 39.000 | alive | .    | .    | 16 | 5  |
| 25 | 48.000 | dead  | .308 | .107 | 17 | 4  |
| 26 | 66.000 | dead  | .231 | .104 | 18 | 3  |
| 27 | 71.000 | dead  | .154 | .094 | 19 | 2  |
| 28 | 79.000 | alive | .    | .    | 19 | 1  |
| 29 | 86.000 | alive | .    | .    | 19 | 0  |

#### Adj Chemo Means and Medians for Survival Time .643

| Adj<br>Chemo | Estimate | Std.<br>Error | Mean<br>95% Confidence Interval |                | Estimate | Std.<br>Error | Median<br>95% Confidence Interval |                |
|--------------|----------|---------------|---------------------------------|----------------|----------|---------------|-----------------------------------|----------------|
|              |          |               | Lower<br>Bound                  | Upper<br>Bound |          |               | Lower<br>Bound                    | Upper<br>Bound |
| no           | 72.500   | 47.023        | .000                            | 164.664        | 6.000    | .             | .                                 | .              |
| yes          | 41.361   | 5.464         | 30.651                          | 52.071         | 29.000   | 3.622         | 21.901                            | 36.099         |
| Overall      | 52.865   | 9.885         | 33.490                          | 72.240         | 29.000   | 6.795         | 15.681                            | 42.319         |

#### Overall Comparisons

|                       | Chi-Square | df | Sig. |
|-----------------------|------------|----|------|
| Log Rank (Mantel-Cox) | .215       | 1  | .643 |

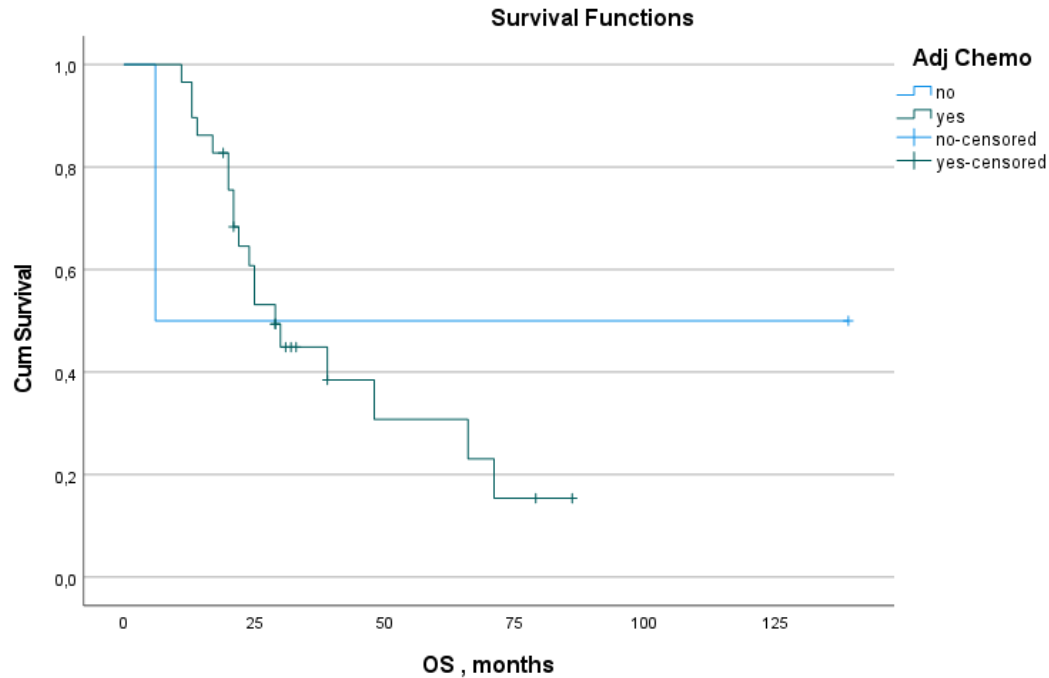

Kaplan-Meier

**Case Processing Summary**

| Portal vein resection | Total N | N of Events | Censored |         |
|-----------------------|---------|-------------|----------|---------|
|                       |         |             | N        | Percent |
| no                    | 19      | 10          | 9        | 47.4%   |
| yes                   | 12      | 10          | 2        | 16.7%   |
| Overall               | 31      | 20          | 11       | 35.5%   |

**Survival Table**

| Portal vein resection |    | Time   | Status | Cumulative Proportion Surviving at the Time |            | N of Cumulative Events | N of Remaining Cases |
|-----------------------|----|--------|--------|---------------------------------------------|------------|------------------------|----------------------|
|                       |    |        |        | Estimate                                    | Std. Error |                        |                      |
| no                    | 1  | 11.000 | dead   | .947                                        | .051       | 1                      | 18                   |
|                       | 2  | 13.000 | dead   | .                                           | .          | 2                      | 17                   |
|                       | 3  | 13.000 | dead   | .842                                        | .084       | 3                      | 16                   |
|                       | 4  | 14.000 | dead   | .789                                        | .094       | 4                      | 15                   |
|                       | 5  | 17.000 | dead   | .737                                        | .101       | 5                      | 14                   |
|                       | 6  | 19.000 | alive  | .                                           | .          | 5                      | 13                   |
|                       | 7  | 21.000 | alive  | .                                           | .          | 5                      | 12                   |
|                       | 8  | 25.000 | dead   | .                                           | .          | 6                      | 11                   |
|                       | 9  | 25.000 | dead   | .614                                        | .116       | 7                      | 10                   |
|                       | 10 | 29.000 | dead   | .553                                        | .119       | 8                      | 9                    |
|                       | 11 | 29.000 | alive  | .                                           | .          | 8                      | 8                    |
|                       | 12 | 29.000 | alive  | .                                           | .          | 8                      | 7                    |

|     |    |         |       |      |      |    |    |
|-----|----|---------|-------|------|------|----|----|
|     | 13 | 31.000  | alive | .    | .    | 8  | 6  |
|     | 14 | 33.000  | alive | .    | .    | 8  | 5  |
|     | 15 | 39.000  | alive | .    | .    | 8  | 4  |
|     | 16 | 48.000  | dead  | .414 | .149 | 9  | 3  |
|     | 17 | 66.000  | dead  | .276 | .150 | 10 | 2  |
|     | 18 | 79.000  | alive | .    | .    | 10 | 1  |
|     | 19 | 139.000 | alive | .    | .    | 10 | 0  |
| yes | 1  | 6.000   | dead  | .917 | .080 | 1  | 11 |
|     | 2  | 20.000  | dead  | .    | .    | 2  | 10 |
|     | 3  | 20.000  | dead  | .750 | .125 | 3  | 9  |
|     | 4  | 21.000  | dead  | .    | .    | 4  | 8  |
|     | 5  | 21.000  | dead  | .583 | .142 | 5  | 7  |
|     | 6  | 22.000  | dead  | .500 | .144 | 6  | 6  |
|     | 7  | 24.000  | dead  | .417 | .142 | 7  | 5  |
|     | 8  | 30.000  | dead  | .333 | .136 | 8  | 4  |
|     | 9  | 32.000  | alive | .    | .    | 8  | 3  |
|     | 10 | 39.000  | dead  | .222 | .128 | 9  | 2  |
|     | 11 | 71.000  | dead  | .111 | .101 | 10 | 1  |
|     | 12 | 86.000  | alive | .    | .    | 10 | 0  |

#### **PV resection Means and Medians for Survival Time .289**

|     |                        |
|-----|------------------------|
| no  | 48 [95%CI:7.733;88.267 |
| yes | 22[95%CI:16.9; 27.12   |

| Portal<br>resection | vein | Mean                    |             |             | Median                  |            |                         |
|---------------------|------|-------------------------|-------------|-------------|-------------------------|------------|-------------------------|
|                     |      | 95% Confidence Interval |             |             | 95% Confidence Interval |            |                         |
|                     |      | Estimate                | Lower Bound | Upper Bound | Estimate                | Std. Error | Lower Bound Upper Bound |
| no                  |      | 62.588                  | 33.502      | 91.673      | 48.000                  | 20.544     | 7.733 88.267            |

|         |        |        |        |        |       |        |        |
|---------|--------|--------|--------|--------|-------|--------|--------|
| yes     | 35.444 | 21.089 | 49.800 | 22.000 | 2.598 | 16.908 | 27.092 |
| Overall | 52.865 | 33.490 | 72.240 | 29.000 | 6.795 | 15.681 | 42.319 |

#### Overall Comparisons

|                       | Chi-Square | df | Sig. |
|-----------------------|------------|----|------|
| Log Rank (Mantel-Cox) | 1.124      | 1  | .289 |

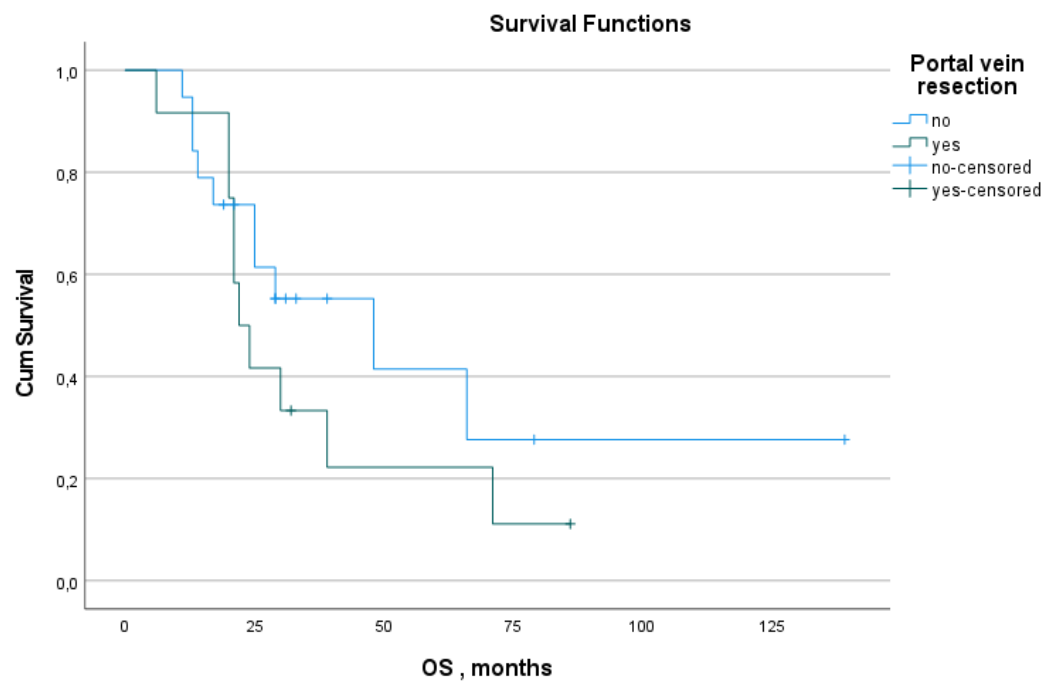

Kaplan-Meier

#### Case Processing Summary

| Perineural invasion | Total N | N of Events | Censored |         |
|---------------------|---------|-------------|----------|---------|
|                     |         |             | N        | Percent |
| no                  | 7       | 3           | 4        | 57.1%   |
| yes                 | 24      | 17          | 7        | 29.2%   |
| Overall             | 31      | 20          | 11       | 35.5%   |

#### Survival Table

|                     |      |         |       | Cumulative Proportion<br>Surviving at the Time |            | N of<br>Cumulative | N of               |
|---------------------|------|---------|-------|------------------------------------------------|------------|--------------------|--------------------|
| Perineural invasion | Time | Status  |       | Estimate                                       | Std. Error | Events             | Remaining<br>Cases |
| no                  | 1    | 14.000  | dead  | .857                                           | .132       | 1                  | 6                  |
|                     | 2    | 17.000  | dead  | .714                                           | .171       | 2                  | 5                  |
|                     | 3    | 19.000  | alive | .                                              | .          | 2                  | 4                  |
|                     | 4    | 21.000  | dead  | .536                                           | .201       | 3                  | 3                  |
|                     | 5    | 21.000  | alive | .                                              | .          | 3                  | 2                  |
|                     | 6    | 39.000  | alive | .                                              | .          | 3                  | 1                  |
|                     | 7    | 139.000 | alive | .                                              | .          | 3                  | 0                  |
| yes                 | 1    | 6.000   | dead  | .958                                           | .041       | 1                  | 23                 |
|                     | 2    | 11.000  | dead  | .917                                           | .056       | 2                  | 22                 |
|                     | 3    | 13.000  | dead  | .                                              | .          | 3                  | 21                 |
|                     | 4    | 13.000  | dead  | .833                                           | .076       | 4                  | 20                 |
|                     | 5    | 20.000  | dead  | .                                              | .          | 5                  | 19                 |
|                     | 6    | 20.000  | dead  | .750                                           | .088       | 6                  | 18                 |
|                     | 7    | 21.000  | dead  | .708                                           | .093       | 7                  | 17                 |
|                     | 8    | 22.000  | dead  | .667                                           | .096       | 8                  | 16                 |
|                     | 9    | 24.000  | dead  | .625                                           | .099       | 9                  | 15                 |
|                     | 10   | 25.000  | dead  | .                                              | .          | 10                 | 14                 |
|                     | 11   | 25.000  | dead  | .542                                           | .102       | 11                 | 13                 |
|                     | 12   | 29.000  | dead  | .500                                           | .102       | 12                 | 12                 |
|                     | 13   | 29.000  | alive | .                                              | .          | 12                 | 11                 |
|                     | 14   | 29.000  | alive | .                                              | .          | 12                 | 10                 |
|                     | 15   | 30.000  | dead  | .450                                           | .103       | 13                 | 9                  |
|                     | 16   | 31.000  | alive | .                                              | .          | 13                 | 8                  |
|                     | 17   | 32.000  | alive | .                                              | .          | 13                 | 7                  |
|                     | 18   | 33.000  | alive | .                                              | .          | 13                 | 6                  |
|                     | 19   | 39.000  | dead  | .375                                           | .110       | 14                 | 5                  |
|                     | 20   | 48.000  | dead  | .300                                           | .111       | 15                 | 4                  |
|                     | 21   | 66.000  | dead  | .225                                           | .105       | 16                 | 3                  |
|                     | 22   | 71.000  | dead  | .150                                           | .093       | 17                 | 2                  |
|                     | 23   | 79.000  | alive | .                                              | .          | 17                 | 1                  |
|                     | 24   | 86.000  | alive | .                                              | .          | 17                 | 0                  |

**Perineural invasion Means and Medians for Survival Time .663**

| Perineural<br>invasion | Estimate | Std.<br>Error | Mean<br>95% Confidence Interval |                | Estimate | Std.<br>Error | Median<br>95% Confidence Interval |                |
|------------------------|----------|---------------|---------------------------------|----------------|----------|---------------|-----------------------------------|----------------|
|                        |          |               | Lower<br>Bound                  | Upper<br>Bound |          |               | Lower<br>Bound                    | Upper<br>Bound |
| no                     | 82.643   | 24.304        | 35.006                          | 130.280        | .        | .             | .                                 | .              |

|         |        |       |        |        |        |       |        |        |
|---------|--------|-------|--------|--------|--------|-------|--------|--------|
| yes     | 40.742 | 5.824 | 29.326 | 52.157 | 29.000 | 3.499 | 22.141 | 35.859 |
| Overall | 52.865 | 9.885 | 33.490 | 72.240 | 29.000 | 6.795 | 15.681 | 42.319 |

#### Overall Comparisons

|                       | Chi-Square | df | Sig. |
|-----------------------|------------|----|------|
| Log Rank (Mantel-Cox) | .190       | 1  | .663 |

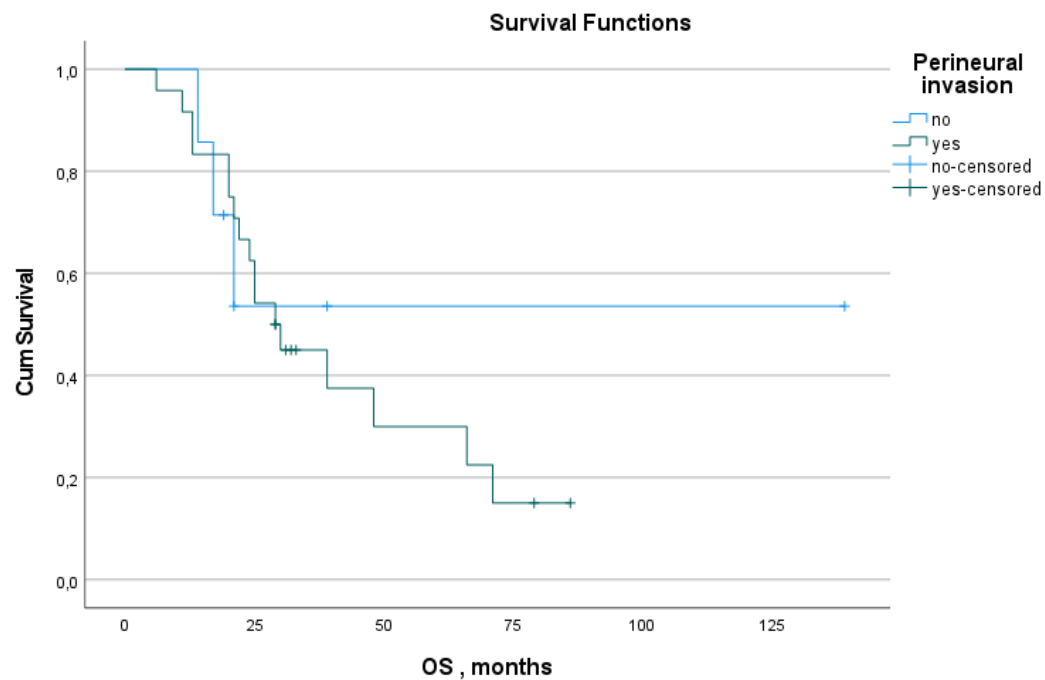

#### PFS

Kaplan-Meier

#### Case Processing Summary

| Total N | N of Events | Censored |         |
|---------|-------------|----------|---------|
|         |             | N        | Percent |
| 31      | 23          | 8        | 25.8%   |

#### Survival Table

|   | Time   | Status | Cumulative Proportion Surviving at the Time |            | N of Cumulative Events | N of Remaining Cases |
|---|--------|--------|---------------------------------------------|------------|------------------------|----------------------|
|   |        |        | Estimate                                    | Std. Error |                        |                      |
| 1 | 4.000  | yes    | .968                                        | .032       | 1                      | 30                   |
| 2 | 6.000  | yes    | .935                                        | .044       | 2                      | 29                   |
| 3 | 9.000  | yes    | .903                                        | .053       | 3                      | 28                   |
| 4 | 10.000 | yes    | .                                           | .          | 4                      | 27                   |
| 5 | 10.000 | yes    | .839                                        | .066       | 5                      | 26                   |
| 6 | 11.000 | yes    | .806                                        | .071       | 6                      | 25                   |
| 7 | 12.000 | yes    | .774                                        | .075       | 7                      | 24                   |

|    |         |     |      |      |    |    |
|----|---------|-----|------|------|----|----|
| 8  | 13.000  | yes | .742 | .079 | 8  | 23 |
| 9  | 14.000  | yes | .    | .    | 9  | 22 |
| 10 | 14.000  | yes | .    | .    | 10 | 21 |
| 11 | 14.000  | yes | .645 | .086 | 11 | 20 |
| 12 | 14.000  | no  | .    | .    | 11 | 19 |
| 13 | 16.000  | yes | .611 | .088 | 12 | 18 |
| 14 | 17.000  | yes | .    | .    | 13 | 17 |
| 15 | 17.000  | yes | .543 | .090 | 14 | 16 |
| 16 | 17.000  | no  | .    | .    | 14 | 15 |
| 17 | 18.000  | yes | .    | .    | 15 | 14 |
| 18 | 18.000  | yes | .    | .    | 16 | 13 |
| 19 | 18.000  | yes | .435 | .091 | 17 | 12 |
| 20 | 19.000  | no  | .    | .    | 17 | 11 |
| 21 | 20.000  | yes | .    | .    | 18 | 10 |
| 22 | 20.000  | yes | .    | .    | 19 | 9  |
| 23 | 20.000  | yes | .316 | .088 | 20 | 8  |
| 24 | 21.000  | no  | .    | .    | 20 | 7  |
| 25 | 29.000  | no  | .    | .    | 20 | 6  |
| 26 | 38.000  | yes | .263 | .088 | 21 | 5  |
| 27 | 39.000  | no  | .    | .    | 21 | 4  |
| 28 | 52.000  | yes | .198 | .087 | 22 | 3  |
| 29 | 66.000  | yes | .132 | .079 | 23 | 2  |
| 30 | 86.000  | no  | .    | .    | 23 | 1  |
| 31 | 139.000 | no  | .    | .    | 23 | 0  |

**PFS Means and Medians for Survival Time 18 [95%CI: 15.98;20.03]**

| Mean                    |            |             |             | Median                  |            |             |             |
|-------------------------|------------|-------------|-------------|-------------------------|------------|-------------|-------------|
| 95% Confidence Interval |            |             |             | 95% Confidence Interval |            |             |             |
| Estimate                | Std. Error | Lower Bound | Upper Bound | Estimate                | Std. Error | Lower Bound | Upper Bound |
| 37.879                  | 8.951      | 20.334      | 55.423      | 18.000                  | 1.036      | 15.970      | 20.030      |

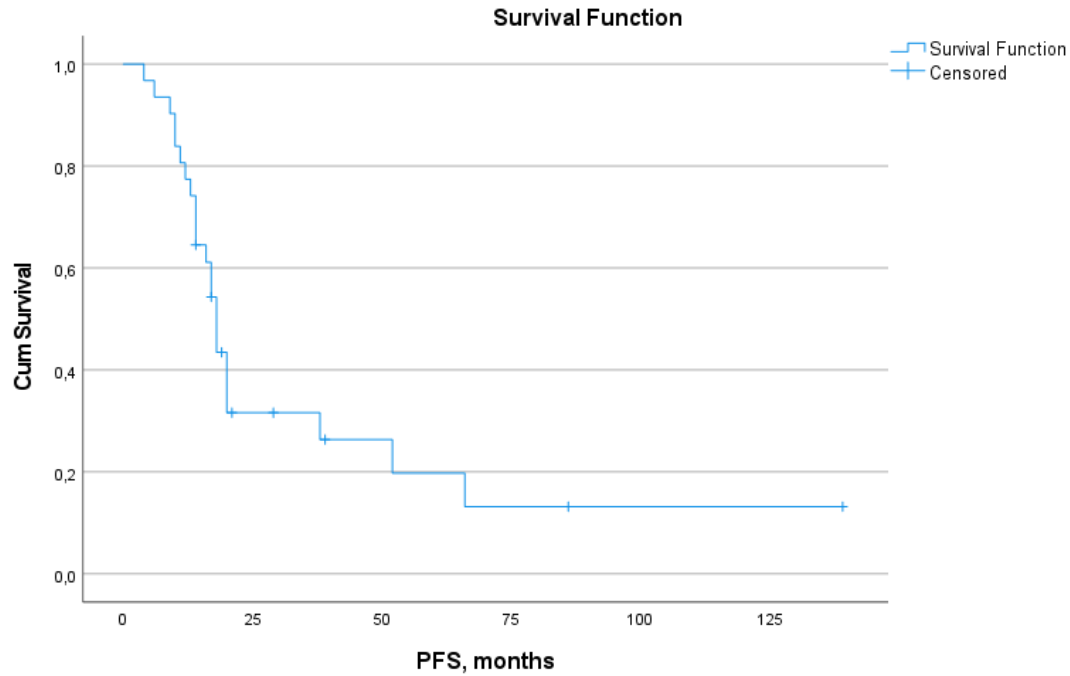

Kaplan-Meier

**Case Processing Summary**

| Gender  | Total N | N of Events | Censored |         |
|---------|---------|-------------|----------|---------|
|         |         |             | N        | Percent |
| f       | 16      | 12          | 4        | 25.0%   |
| m       | 15      | 11          | 4        | 26.7%   |
| Overall | 31      | 23          | 8        | 25.8%   |

**Survival Table**

| Gender | Time | Status | Cumulative Proportion Surviving at the Time |            | N of Cumulative Events | N of Remaining Cases |
|--------|------|--------|---------------------------------------------|------------|------------------------|----------------------|
|        |      |        | Estimate                                    | Std. Error |                        |                      |
| f      | 1    | 4.000  | yes                                         | .938       | .061                   | 15                   |
|        | 2    | 10.000 | yes                                         | .875       | .083                   | 14                   |
|        | 3    | 12.000 | yes                                         | .813       | .098                   | 13                   |
|        | 4    | 14.000 | yes                                         | .          | .                      | 12                   |
|        | 5    | 14.000 | yes                                         | .688       | .116                   | 11                   |
|        | 6    | 14.000 | no                                          | .          | .                      | 10                   |
|        | 7    | 17.000 | yes                                         | .619       | .123                   | 9                    |
|        | 8    | 18.000 | yes                                         | .550       | .127                   | 8                    |
|        | 9    | 19.000 | no                                          | .          | .                      | 7                    |
|        | 10   | 20.000 | yes                                         | .          | .                      | 6                    |
|        | 11   | 20.000 | yes                                         | .          | .                      | 5                    |
|        | 12   | 20.000 | yes                                         | .314       | .126                   | 4                    |
|        | 13   | 29.000 | no                                          | .          | .                      | 3                    |



|   |    |         |     |      |      |    |    |
|---|----|---------|-----|------|------|----|----|
| m | 14 | 52.000  | yes | .210 | .120 | 11 | 2  |
|   | 15 | 66.000  | yes | .105 | .095 | 12 | 1  |
|   | 16 | 139.000 | no  | .    | .    | 12 | 0  |
|   | 1  | 6.000   | yes | .933 | .064 | 1  | 14 |
|   | 2  | 9.000   | yes | .867 | .088 | 2  | 13 |
|   | 3  | 10.000  | yes | .800 | .103 | 3  | 12 |
|   | 4  | 11.000  | yes | .733 | .114 | 4  | 11 |
|   | 5  | 13.000  | yes | .667 | .122 | 5  | 10 |
|   | 6  | 14.000  | yes | .600 | .126 | 6  | 9  |
|   | 7  | 16.000  | yes | .533 | .129 | 7  | 8  |
|   | 8  | 17.000  | yes | .467 | .129 | 8  | 7  |
|   | 9  | 17.000  | no  | .    | .    | 8  | 6  |
|   | 10 | 18.000  | yes | .    | .    | 9  | 5  |
|   | 11 | 18.000  | yes | .311 | .124 | 10 | 4  |
|   | 12 | 21.000  | no  | .    | .    | 10 | 3  |
|   | 13 | 38.000  | yes | .207 | .118 | 11 | 2  |
|   | 14 | 39.000  | no  | .    | .    | 11 | 1  |
|   | 15 | 86.000  | no  | .    | .    | 11 | 0  |

**Gender Means and Medians for Survival Time .597**

| Gender  | Estimate | Std.<br>Error | Mean<br>95% Confidence Interval |                | Estimate | Std.<br>Error | Median<br>95% Confidence Interval |                |
|---------|----------|---------------|---------------------------------|----------------|----------|---------------|-----------------------------------|----------------|
|         |          |               | Lower<br>Bound                  | Upper<br>Bound |          |               | Lower<br>Bound                    | Upper<br>Bound |
| f       | 37.419   | 11.227        | 15.414                          | 59.425         | 20.000   | 1.069         | 17.906                            | 22.094         |
| m       | 30.978   | 8.136         | 15.031                          | 46.925         | 17.000   | 1.784         | 13.504                            | 20.496         |
| Overall | 37.879   | 8.951         | 20.334                          | 55.423         | 18.000   | 1.036         | 15.970                            | 20.030         |

**Overall Comparisons**

|                       | Chi-Square | df | Sig. |
|-----------------------|------------|----|------|
| Log Rank (Mantel-Cox) | .279       | 1  | .597 |

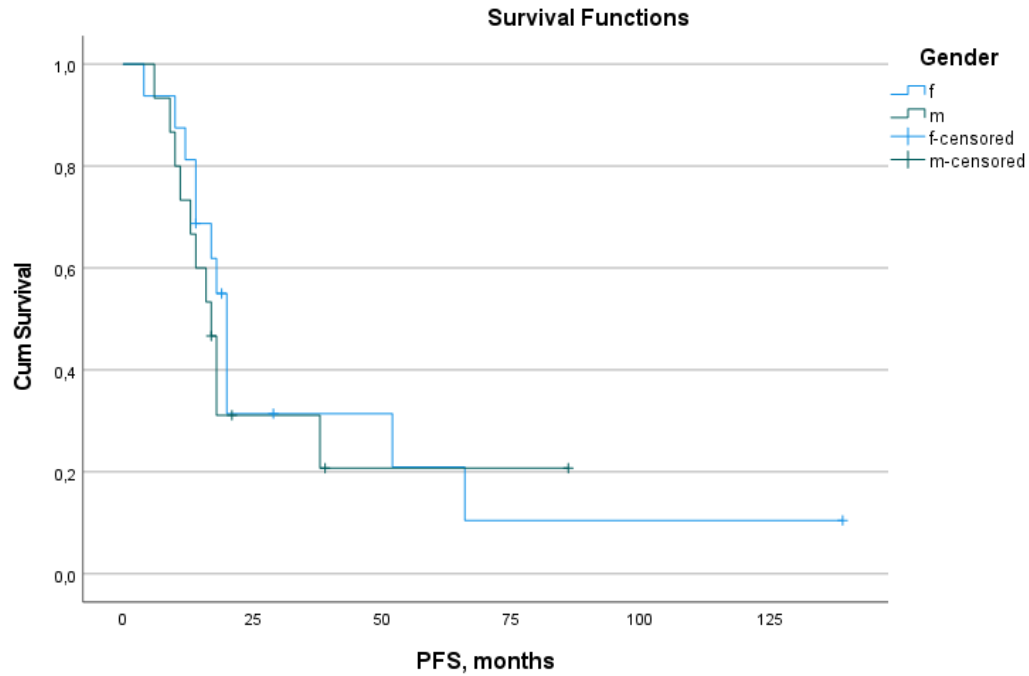

Kaplan-Meier

**Case Processing Summary**

| Additional artery resection | Total N | N of Events | Censored |         |
|-----------------------------|---------|-------------|----------|---------|
|                             |         |             | N        | Percent |
| no                          | 23      | 19          | 4        | 17.4%   |
| yes                         | 8       | 4           | 4        | 50.0%   |
| Overall                     | 31      | 23          | 8        | 25.8%   |

**Survival Table**

| Additional resection | artery | Time   | Status | Cumulative Proportion Surviving at the Time |            | N of Cumulative Events | N of Remaining Cases |
|----------------------|--------|--------|--------|---------------------------------------------|------------|------------------------|----------------------|
|                      |        |        |        | Estimate                                    | Std. Error |                        |                      |
| no                   | 1      | 4.000  | yes    | .957                                        | .043       | 1                      | 22                   |
|                      | 2      | 6.000  | yes    | .913                                        | .059       | 2                      | 21                   |
|                      | 3      | 9.000  | yes    | .870                                        | .070       | 3                      | 20                   |
|                      | 4      | 10.000 | yes    | .                                           | .          | 4                      | 19                   |
|                      | 5      | 10.000 | yes    | .783                                        | .086       | 5                      | 18                   |
|                      | 6      | 11.000 | yes    | .739                                        | .092       | 6                      | 17                   |
|                      | 7      | 13.000 | yes    | .696                                        | .096       | 7                      | 16                   |
|                      | 8      | 14.000 | yes    | .                                           | .          | 8                      | 15                   |
|                      | 9      | 14.000 | yes    | .                                           | .          | 9                      | 14                   |
|                      | 10     | 14.000 | yes    | .565                                        | .103       | 10                     | 13                   |
|                      | 11     | 14.000 | no     | .                                           | .          | 10                     | 12                   |
|                      | 12     | 17.000 | yes    | .                                           | .          | 11                     | 11                   |
|                      | 13     | 17.000 | yes    | .471                                        | .105       | 12                     | 10                   |

|     |    |         |     |      |      |    |   |
|-----|----|---------|-----|------|------|----|---|
|     | 14 | 18.000  | yes | .    | .    | 13 | 9 |
|     | 15 | 18.000  | yes | .377 | .103 | 14 | 8 |
|     | 16 | 19.000  | no  | .    | .    | 14 | 7 |
|     | 17 | 20.000  | yes | .    | .    | 15 | 6 |
|     | 18 | 20.000  | yes | .269 | .098 | 16 | 5 |
|     | 19 | 29.000  | no  | .    | .    | 16 | 4 |
|     | 20 | 38.000  | yes | .202 | .094 | 17 | 3 |
|     | 21 | 52.000  | yes | .135 | .083 | 18 | 2 |
|     | 22 | 66.000  | yes | .067 | .063 | 19 | 1 |
|     | 23 | 86.000  | no  | .    | .    | 19 | 0 |
| yes | 1  | 12.000  | yes | .875 | .117 | 1  | 7 |
|     | 2  | 16.000  | yes | .750 | .153 | 2  | 6 |
|     | 3  | 17.000  | no  | .    | .    | 2  | 5 |
|     | 4  | 18.000  | yes | .600 | .182 | 3  | 4 |
|     | 5  | 20.000  | yes | .450 | .188 | 4  | 3 |
|     | 6  | 21.000  | no  | .    | .    | 4  | 2 |
|     | 7  | 39.000  | no  | .    | .    | 4  | 1 |
|     | 8  | 139.000 | no  | .    | .    | 4  | 0 |

#### Additional artery resection Means and Medians for Survival Time .130

No – 17[95%:12.6;21.39]. Yes – 20 [95%:15.1;20.03]

|                      |        | Mean                    |            |             |             | Median                  |            |             |             |
|----------------------|--------|-------------------------|------------|-------------|-------------|-------------------------|------------|-------------|-------------|
|                      |        | 95% Confidence Interval |            |             |             | 95% Confidence Interval |            |             |             |
| Additional resection | artery | Estimate                | Std. Error | Lower Bound | Upper Bound | Estimate                | Std. Error | Lower Bound | Upper Bound |
| no                   |        | 26.299                  | 5.186      | 16.136      | 36.463      | 17.000                  | 2.239      | 12.612      | 21.388      |
| yes                  |        | 71.750                  | 22.977     | 26.716      | 116.784     | 20.000                  | 2.510      | 15.080      | 24.920      |
| Overall              |        | 37.879                  | 8.951      | 20.334      | 55.423      | 18.000                  | 1.036      | 15.970      | 20.030      |

#### Overall Comparisons

|                       | Chi-Square | df | Sig. |
|-----------------------|------------|----|------|
| Log Rank (Mantel-Cox) | 2.290      | 1  | .130 |

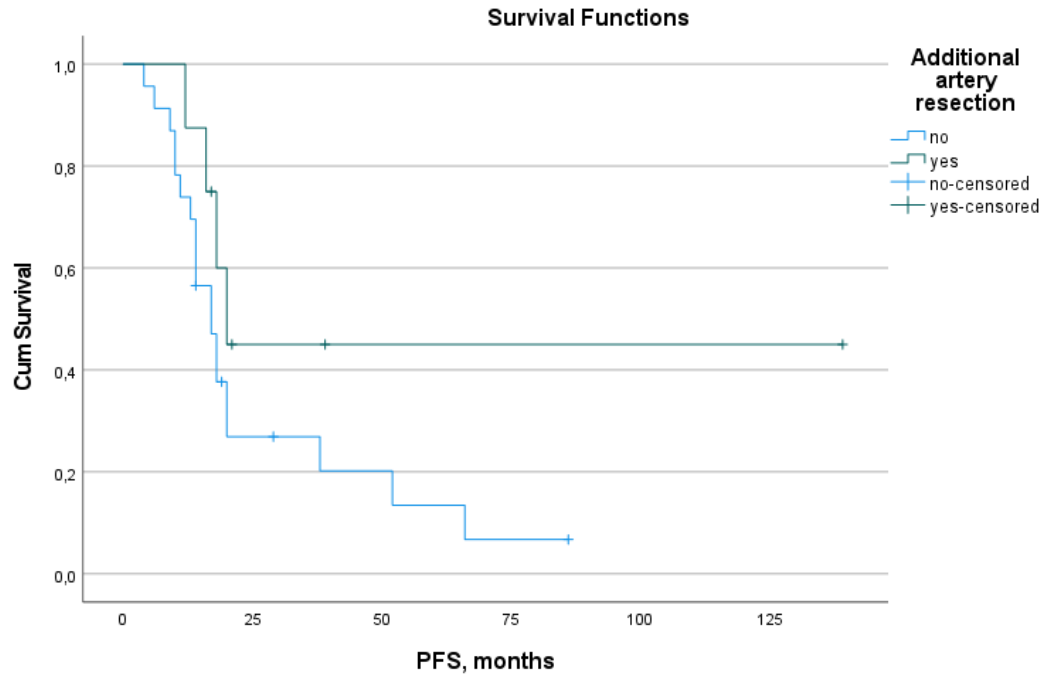

Kaplan-Meier

**Case Processing Summary**

| NA Chemo | Total N | N of Events | Censored |         |
|----------|---------|-------------|----------|---------|
|          |         |             | N        | Percent |
| no       | 13      | 12          | 1        | 7.7%    |
| yes      | 18      | 11          | 7        | 38.9%   |
| Overall  | 31      | 23          | 8        | 25.8%   |

**Survival Table**

|          |      |        |     | Cumulative Proportion<br>Surviving at the Time |            | N of<br>Cumulative<br>Events | N of Remaining<br>Cases |
|----------|------|--------|-----|------------------------------------------------|------------|------------------------------|-------------------------|
| NA Chemo | Time | Status |     | Estimate                                       | Std. Error |                              |                         |
| no       | 1    | 4.000  | yes | .923                                           | .074       | 1                            | 12                      |
|          | 2    | 6.000  | yes | .846                                           | .100       | 2                            | 11                      |
|          | 3    | 9.000  | yes | .769                                           | .117       | 3                            | 10                      |
|          | 4    | 10.000 | yes | .692                                           | .128       | 4                            | 9                       |
|          | 5    | 12.000 | yes | .615                                           | .135       | 5                            | 8                       |
|          | 6    | 13.000 | yes | .538                                           | .138       | 6                            | 7                       |
|          | 7    | 16.000 | yes | .462                                           | .138       | 7                            | 6                       |
|          | 8    | 17.000 | yes | .                                              | .          | 8                            | 5                       |
|          | 9    | 17.000 | yes | .308                                           | .128       | 9                            | 4                       |
|          | 10   | 20.000 | yes | .231                                           | .117       | 10                           | 3                       |
|          | 11   | 38.000 | yes | .154                                           | .100       | 11                           | 2                       |
|          | 12   | 52.000 | yes | .077                                           | .074       | 12                           | 1                       |
|          | 13   | 86.000 | no  | .                                              | .          | 12                           | 0                       |

|     |    |         |     |      |      |    |    |
|-----|----|---------|-----|------|------|----|----|
| yes | 1  | 10.000  | yes | .944 | .054 | 1  | 17 |
|     | 2  | 11.000  | yes | .889 | .074 | 2  | 16 |
|     | 3  | 14.000  | yes | .    | .    | 3  | 15 |
|     | 4  | 14.000  | yes | .    | .    | 4  | 14 |
|     | 5  | 14.000  | yes | .722 | .106 | 5  | 13 |
|     | 6  | 14.000  | no  | .    | .    | 5  | 12 |
|     | 7  | 17.000  | no  | .    | .    | 5  | 11 |
|     | 8  | 18.000  | yes | .    | .    | 6  | 10 |
|     | 9  | 18.000  | yes | .    | .    | 7  | 9  |
|     | 10 | 18.000  | yes | .525 | .124 | 8  | 8  |
|     | 11 | 19.000  | no  | .    | .    | 8  | 7  |
|     | 12 | 20.000  | yes | .    | .    | 9  | 6  |
|     | 13 | 20.000  | yes | .375 | .126 | 10 | 5  |
|     | 14 | 21.000  | no  | .    | .    | 10 | 4  |
|     | 15 | 29.000  | no  | .    | .    | 10 | 3  |
|     | 16 | 39.000  | no  | .    | .    | 10 | 2  |
|     | 17 | 66.000  | yes | .188 | .147 | 11 | 1  |
|     | 18 | 139.000 | no  | .    | .    | 11 | 0  |

#### NA Chemo Means and Medians for Survival Time .078

No – 16[95%CI:11.6;20.4]. Yes – 20 [95%CI:15.7;24.27]

| NA<br>Chemo | Estimate | Std.<br>Error | Mean<br>95% Confidence Interval |                | Estimate | Std.<br>Error | Median<br>95% Confidence Interval |                |
|-------------|----------|---------------|---------------------------------|----------------|----------|---------------|-----------------------------------|----------------|
|             |          |               | Lower<br>Bound                  | Upper<br>Bound |          |               | Lower<br>Bound                    | Upper<br>Bound |
| no          | 23.077   | 6.154         | 11.015                          | 35.139         | 16.000   | 2.247         | 11.596                            | 20.404         |
| yes         | 48.503   | 14.526        | 20.031                          | 76.975         | 20.000   | 2.177         | 15.734                            | 24.266         |
| Overall     | 37.879   | 8.951         | 20.334                          | 55.423         | 18.000   | 1.036         | 15.970                            | 20.030         |

#### Overall Comparisons

|                       | Chi-Square | df | Sig. |
|-----------------------|------------|----|------|
| Log Rank (Mantel-Cox) | 3.097      | 1  | .078 |

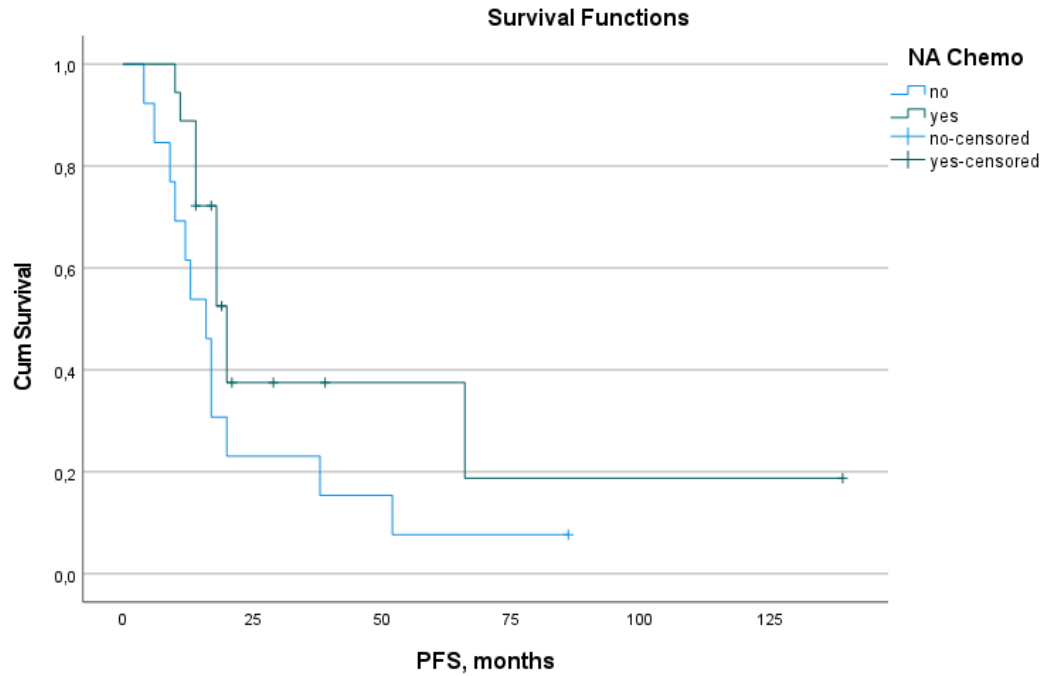

Kaplan-Meier

**Case Processing Summary**

| Adj Chemo | Total N | N of Events | Censored |         |
|-----------|---------|-------------|----------|---------|
|           |         |             | N        | Percent |
| no        | 2       | 1           | 1        | 50.0%   |
| yes       | 29      | 22          | 7        | 24.1%   |
| Overall   | 31      | 23          | 8        | 25.8%   |

**Survival Table**

| Adj Chemo | Time | Status  | Cumulative Proportion Surviving at the Time |            | N of Cumulative Events | N of Remaining Cases |
|-----------|------|---------|---------------------------------------------|------------|------------------------|----------------------|
|           |      |         | Estimate                                    | Std. Error |                        |                      |
| no        | 1    | 4.000   | yes                                         | .500       | .354                   | 1                    |
|           | 2    | 139.000 | no                                          | .          | .                      | 0                    |
| yes       | 1    | 6.000   | yes                                         | .966       | .034                   | 1                    |
|           | 2    | 9.000   | yes                                         | .931       | .047                   | 2                    |
|           | 3    | 10.000  | yes                                         | .          | .                      | 3                    |
|           | 4    | 10.000  | yes                                         | .862       | .064                   | 4                    |
|           | 5    | 11.000  | yes                                         | .828       | .070                   | 5                    |
|           | 6    | 12.000  | yes                                         | .793       | .075                   | 6                    |
|           | 7    | 13.000  | yes                                         | .759       | .079                   | 7                    |
|           | 8    | 14.000  | yes                                         | .          | .                      | 8                    |
|           | 9    | 14.000  | yes                                         | .          | .                      | 9                    |
|           | 10   | 14.000  | yes                                         | .655       | .088                   | 10                   |
|           | 11   | 14.000  | no                                          | .          | .                      | 10                   |

|    |        |     |      |      |    |    |
|----|--------|-----|------|------|----|----|
| 12 | 16.000 | yes | .619 | .091 | 11 | 17 |
| 13 | 17.000 | yes | .    | .    | 12 | 16 |
| 14 | 17.000 | yes | .546 | .093 | 13 | 15 |
| 15 | 17.000 | no  | .    | .    | 13 | 14 |
| 16 | 18.000 | yes | .    | .    | 14 | 13 |
| 17 | 18.000 | yes | .    | .    | 15 | 12 |
| 18 | 18.000 | yes | .429 | .095 | 16 | 11 |
| 19 | 19.000 | no  | .    | .    | 16 | 10 |
| 20 | 20.000 | yes | .    | .    | 17 | 9  |
| 21 | 20.000 | yes | .    | .    | 18 | 8  |
| 22 | 20.000 | yes | .300 | .091 | 19 | 7  |
| 23 | 21.000 | no  | .    | .    | 19 | 6  |
| 24 | 29.000 | no  | .    | .    | 19 | 5  |
| 25 | 38.000 | yes | .240 | .090 | 20 | 4  |
| 26 | 39.000 | no  | .    | .    | 20 | 3  |
| 27 | 52.000 | yes | .160 | .089 | 21 | 2  |
| 28 | 66.000 | yes | .080 | .072 | 22 | 1  |
| 29 | 86.000 | no  | .    | .    | 22 | 0  |

#### Means and Medians for Survival Time

| Adj<br>Chemo | Estimate | Std.<br>Error | Mean<br>95% Confidence Interval |                | Estimate | Std.<br>Error | Median<br>95% Confidence Interval |                |
|--------------|----------|---------------|---------------------------------|----------------|----------|---------------|-----------------------------------|----------------|
|              |          |               | Lower<br>Bound                  | Upper<br>Bound |          |               | Lower<br>Bound                    | Upper<br>Bound |
| no           | 71.500   | 47.730        | .000                            | 165.050        | 4.000    | .             | .                                 | .              |
| yes          | 29.014   | 4.970         | 19.273                          | 38.756         | 18.000   | .998          | 16.044                            | 19.956         |
| Overall      | 37.879   | 8.951         | 20.334                          | 55.423         | 18.000   | 1.036         | 15.970                            | 20.030         |

#### Overall Comparisons

|                       | Chi-Square | df | Sig. |
|-----------------------|------------|----|------|
| Log Rank (Mantel-Cox) | .479       | 1  | .489 |

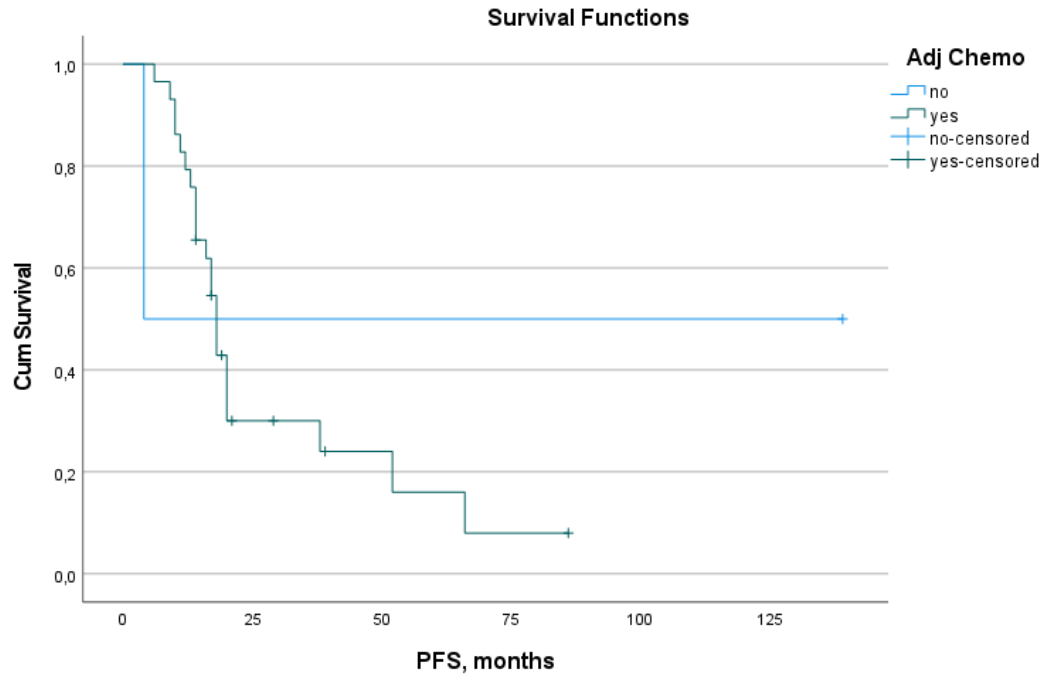

Kaplan-Meier

**Case Processing Summary**

| Portal vein resection | Total N | N of Events | Censored |         |
|-----------------------|---------|-------------|----------|---------|
|                       |         |             | N        | Percent |
| no                    | 19      | 12          | 7        | 36.8%   |
| yes                   | 12      | 11          | 1        | 8.3%    |
| Overall               | 31      | 23          | 8        | 25.8%   |

**Survival Table**

| Portal vein resection |    | Time   | Status | Cumulative Proportion Surviving at the Time |            | N of Cumulative Events | N of Remaining Cases |
|-----------------------|----|--------|--------|---------------------------------------------|------------|------------------------|----------------------|
|                       |    |        |        | Estimate                                    | Std. Error |                        |                      |
| no                    | 1  | 6.000  | yes    | .947                                        | .051       | 1                      | 18                   |
|                       | 2  | 9.000  | yes    | .895                                        | .070       | 2                      | 17                   |
|                       | 3  | 10.000 | yes    | .                                           | .          | 3                      | 16                   |
|                       | 4  | 10.000 | yes    | .789                                        | .094       | 4                      | 15                   |
|                       | 5  | 11.000 | yes    | .737                                        | .101       | 5                      | 14                   |
|                       | 6  | 13.000 | yes    | .684                                        | .107       | 6                      | 13                   |
|                       | 7  | 14.000 | yes    | .632                                        | .111       | 7                      | 12                   |
|                       | 8  | 14.000 | no     | .                                           | .          | 7                      | 11                   |
|                       | 9  | 17.000 | no     | .                                           | .          | 7                      | 10                   |
|                       | 10 | 19.000 | no     | .                                           | .          | 7                      | 9                    |
|                       | 11 | 20.000 | yes    | .                                           | .          | 8                      | 8                    |
|                       | 12 | 20.000 | yes    | .                                           | .          | 9                      | 7                    |



|     |    |         |     |      |      |    |    |
|-----|----|---------|-----|------|------|----|----|
|     | 13 | 20.000  | yes | .421 | .124 | 10 | 6  |
|     | 14 | 21.000  | no  | .    | .    | 10 | 5  |
|     | 15 | 29.000  | no  | .    | .    | 10 | 4  |
|     | 16 | 38.000  | yes | .316 | .130 | 11 | 3  |
|     | 17 | 39.000  | no  | .    | .    | 11 | 2  |
|     | 18 | 52.000  | yes | .158 | .129 | 12 | 1  |
|     | 19 | 139.000 | no  | .    | .    | 12 | 0  |
| yes | 1  | 4.000   | yes | .917 | .080 | 1  | 11 |
|     | 2  | 12.000  | yes | .833 | .108 | 2  | 10 |
|     | 3  | 14.000  | yes | .    | .    | 3  | 9  |
|     | 4  | 14.000  | yes | .667 | .136 | 4  | 8  |
|     | 5  | 16.000  | yes | .583 | .142 | 5  | 7  |
|     | 6  | 17.000  | yes | .    | .    | 6  | 6  |
|     | 7  | 17.000  | yes | .417 | .142 | 7  | 5  |
|     | 8  | 18.000  | yes | .    | .    | 8  | 4  |
|     | 9  | 18.000  | yes | .    | .    | 9  | 3  |
|     | 10 | 18.000  | yes | .167 | .108 | 10 | 2  |
|     | 11 | 66.000  | yes | .083 | .080 | 11 | 1  |
|     | 12 | 86.000  | no  | .    | .    | 11 | 0  |

**PV resection Means and Medians for Survival Time .308**

**No – 20[95%CI:13.1;26.91]. Yes – 17[95%CI:15.37;18.68]**

| Portal<br>resection | vein | Estimate | Std.<br>Error | Mean<br>95% Confidence Interval |                | Estimate | Std.<br>Error | Median<br>95% Confidence Interval |                |
|---------------------|------|----------|---------------|---------------------------------|----------------|----------|---------------|-----------------------------------|----------------|
|                     |      |          |               | Lower<br>Bound                  | Upper<br>Bound |          |               | Lower<br>Bound                    | Upper<br>Bound |
| no                  |      | 42.211   | 13.775        | 15.211                          | 69.210         | 20.000   | 3.524         | 13.092                            | 26.908         |
| yes                 |      | 25.000   | 6.775         | 11.721                          | 38.279         | 17.000   | .854          | 15.326                            | 18.674         |
| Overall             |      | 37.879   | 8.951         | 20.334                          | 55.423         | 18.000   | 1.036         | 15.970                            | 20.030         |

**Overall Comparisons**

|                       | Chi-Square | df | Sig. |
|-----------------------|------------|----|------|
| Log Rank (Mantel-Cox) | 1.040      | 1  | .308 |

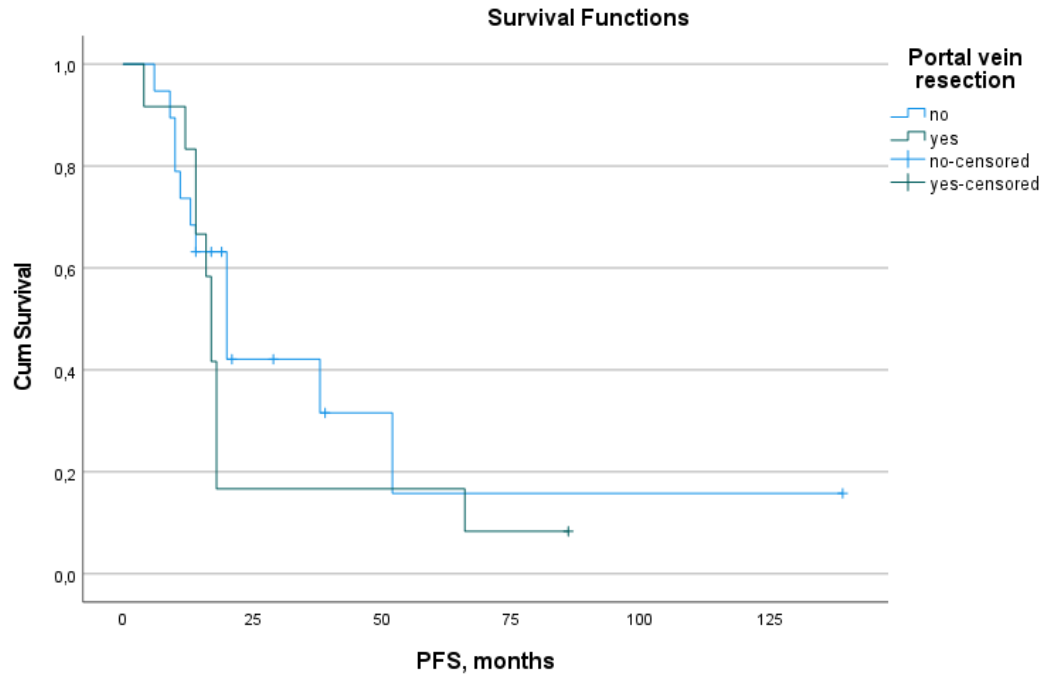

Kaplan-Meier

**Case Processing Summary**

| Perineural invasion | Total N | N of Events | Censored |         |
|---------------------|---------|-------------|----------|---------|
|                     |         |             | N        | Percent |
| no                  | 7       | 1           | 6        | 85.7%   |
| yes                 | 24      | 22          | 2        | 8.3%    |
| Overall             | 31      | 23          | 8        | 25.8%   |

**Survival Table**

|                     |      |         |          | Cumulative Proportion<br>Surviving at the Time |      | N of<br>Cumulative<br>Events | N of<br>Remaining<br>Cases |
|---------------------|------|---------|----------|------------------------------------------------|------|------------------------------|----------------------------|
| Perineural invasion | Time | Status  | Estimate | Std. Error                                     |      |                              |                            |
| no                  | 1    | 14.000  | no       | .                                              | .    | 0                            | 6                          |
|                     | 2    | 17.000  | no       | .                                              | .    | 0                            | 5                          |
|                     | 3    | 18.000  | yes      | .800                                           | .179 | 1                            | 4                          |
|                     | 4    | 19.000  | no       | .                                              | .    | 1                            | 3                          |
|                     | 5    | 21.000  | no       | .                                              | .    | 1                            | 2                          |
|                     | 6    | 39.000  | no       | .                                              | .    | 1                            | 1                          |
|                     | 7    | 139.000 | no       | .                                              | .    | 1                            | 0                          |
| yes                 | 1    | 4.000   | yes      | .958                                           | .041 | 1                            | 23                         |
|                     | 2    | 6.000   | yes      | .917                                           | .056 | 2                            | 22                         |
|                     | 3    | 9.000   | yes      | .875                                           | .068 | 3                            | 21                         |
|                     | 4    | 10.000  | yes      | .                                              | .    | 4                            | 20                         |
|                     | 5    | 10.000  | yes      | .792                                           | .083 | 5                            | 19                         |
|                     | 6    | 11.000  | yes      | .750                                           | .088 | 6                            | 18                         |

|    |        |     |      |      |    |    |
|----|--------|-----|------|------|----|----|
| 7  | 12.000 | yes | .708 | .093 | 7  | 17 |
| 8  | 13.000 | yes | .667 | .096 | 8  | 16 |
| 9  | 14.000 | yes | .    | .    | 9  | 15 |
| 10 | 14.000 | yes | .    | .    | 10 | 14 |
| 11 | 14.000 | yes | .542 | .102 | 11 | 13 |
| 12 | 16.000 | yes | .500 | .102 | 12 | 12 |
| 13 | 17.000 | yes | .    | .    | 13 | 11 |
| 14 | 17.000 | yes | .417 | .101 | 14 | 10 |
| 15 | 18.000 | yes | .    | .    | 15 | 9  |
| 16 | 18.000 | yes | .333 | .096 | 16 | 8  |
| 17 | 20.000 | yes | .    | .    | 17 | 7  |
| 18 | 20.000 | yes | .    | .    | 18 | 6  |
| 19 | 20.000 | yes | .208 | .083 | 19 | 5  |
| 20 | 29.000 | no  | .    | .    | 19 | 4  |
| 21 | 38.000 | yes | .156 | .077 | 20 | 3  |
| 22 | 52.000 | yes | .104 | .067 | 21 | 2  |
| 23 | 66.000 | yes | .052 | .050 | 22 | 1  |
| 24 | 86.000 | no  | .    | .    | 22 | 0  |

**Perineural invasion Means and Medians for Survival Time .007**

| Perineural invasion | Estimate | Std. Error | Mean<br>95% Confidence Interval |             | Estimate | Std. Error | Median<br>95% Confidence Interval |             |
|---------------------|----------|------------|---------------------------------|-------------|----------|------------|-----------------------------------|-------------|
|                     |          |            | Lower Bound                     | Upper Bound |          |            | Lower Bound                       | Upper Bound |
| no                  | 114.800  | 21.645     | 72.376                          | 157.224     | .        | .          | .                                 | .           |
| yes                 | 23.563   | 4.366      | 15.005                          | 32.120      | 16.000   | 1.633      | 12.799                            | 19.201      |
| Overall             | 37.879   | 8.951      | 20.334                          | 55.423      | 18.000   | 1.036      | 15.970                            | 20.030      |

**Overall Comparisons**

|                       | Chi-Square | df | Sig. |
|-----------------------|------------|----|------|
| Log Rank (Mantel-Cox) | 7.321      | 1  | .007 |

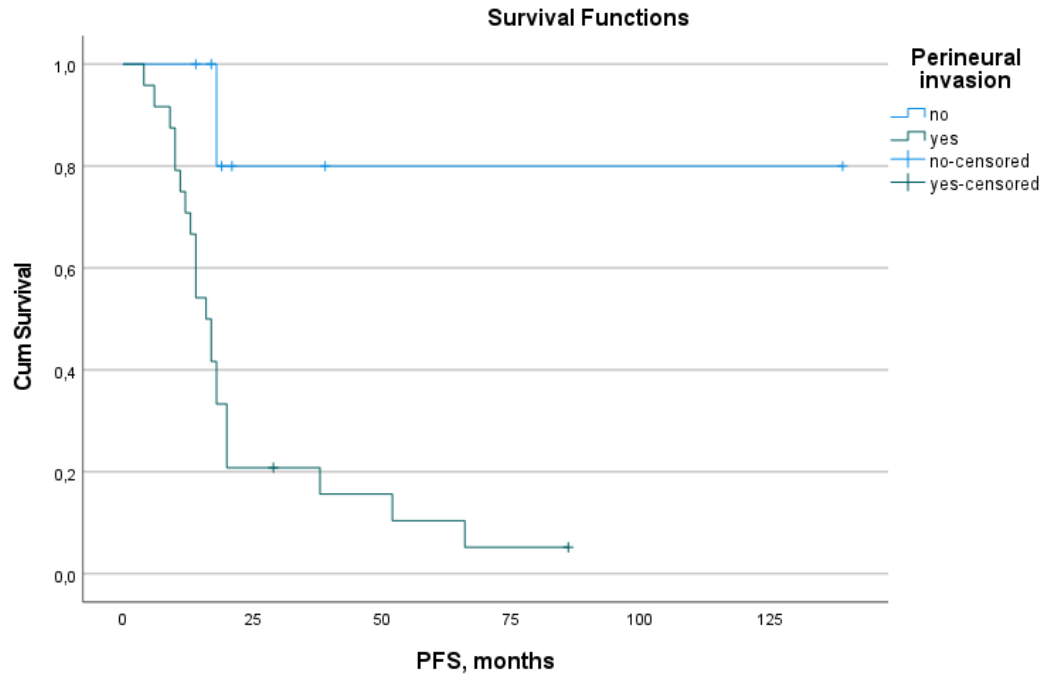

Kaplan-Meier

**Case Processing Summary**

| R-status | Total N | N of Events | Censored |         |
|----------|---------|-------------|----------|---------|
|          |         |             | N        | Percent |
| no       | 28      | 20          | 8        | 28.6%   |
| yes      | 3       | 3           | 0        | 0.0%    |
| Overall  | 31      | 23          | 8        | 25.8%   |

**Survival Table**

|          |      |        | Cumulative Proportion<br>Surviving at the Time |            | N of<br>Cumulative<br>Events | N of Remaining<br>Cases |    |
|----------|------|--------|------------------------------------------------|------------|------------------------------|-------------------------|----|
| R-status | Time | Status | Estimate                                       | Std. Error |                              |                         |    |
| no       | 1    | 4.000  | yes                                            | .964       | .035                         | 1                       | 27 |
|          | 2    | 6.000  | yes                                            | .929       | .049                         | 2                       | 26 |
|          | 3    | 9.000  | yes                                            | .893       | .058                         | 3                       | 25 |
|          | 4    | 10.000 | yes                                            | .          | .                            | 4                       | 24 |
|          | 5    | 10.000 | yes                                            | .821       | .072                         | 5                       | 23 |
|          | 6    | 11.000 | yes                                            | .786       | .078                         | 6                       | 22 |
|          | 7    | 12.000 | yes                                            | .750       | .082                         | 7                       | 21 |
|          | 8    | 13.000 | yes                                            | .714       | .085                         | 8                       | 20 |
|          | 9    | 14.000 | yes                                            | .          | .                            | 9                       | 19 |
|          | 10   | 14.000 | yes                                            | .          | .                            | 10                      | 18 |
|          | 11   | 14.000 | yes                                            | .607       | .092                         | 11                      | 17 |
|          | 12   | 14.000 | no                                             | .          | .                            | 11                      | 16 |

|     |    |         |     |      |      |    |    |
|-----|----|---------|-----|------|------|----|----|
|     | 13 | 16.000  | yes | .569 | .094 | 12 | 15 |
|     | 14 | 17.000  | yes | .531 | .095 | 13 | 14 |
|     | 15 | 17.000  | no  | .    | .    | 13 | 13 |
|     | 16 | 18.000  | yes | .    | .    | 14 | 12 |
|     | 17 | 18.000  | yes | .    | .    | 15 | 11 |
|     | 18 | 18.000  | yes | .409 | .096 | 16 | 10 |
|     | 19 | 19.000  | no  | .    | .    | 16 | 9  |
|     | 20 | 20.000  | yes | .    | .    | 17 | 8  |
|     | 21 | 20.000  | yes | .    | .    | 18 | 7  |
|     | 22 | 20.000  | yes | .272 | .091 | 19 | 6  |
|     | 23 | 21.000  | no  | .    | .    | 19 | 5  |
|     | 24 | 29.000  | no  | .    | .    | 19 | 4  |
|     | 25 | 39.000  | no  | .    | .    | 19 | 3  |
|     | 26 | 66.000  | yes | .182 | .096 | 20 | 2  |
|     | 27 | 86.000  | no  | .    | .    | 20 | 1  |
|     | 28 | 139.000 | no  | .    | .    | 20 | 0  |
| yes | 1  | 17.000  | yes | .667 | .272 | 1  | 2  |
|     | 2  | 38.000  | yes | .333 | .272 | 2  | 1  |
|     | 3  | 52.000  | yes | .000 | .000 | 3  | 0  |

**R-status Means and Medians for Survival Time .857**

| R-status | Estimate | Std. Error | Mean<br>95% Confidence Interval |             | Estimate | Std. Error | Median<br>95% Confidence Interval |             |
|----------|----------|------------|---------------------------------|-------------|----------|------------|-----------------------------------|-------------|
|          |          |            | Lower Bound                     | Upper Bound |          |            | Lower Bound                       | Upper Bound |
| no       | 41.601   | 10.564     | 20.896                          | 62.306      | 18.000   | 1.195      | 15.657                            | 20.343      |
| yes      | 35.667   | 10.171     | 15.732                          | 55.601      | 38.000   | 17.146     | 4.393                             | 71.607      |
| Overall  | 37.879   | 8.951      | 20.334                          | 55.423      | 18.000   | 1.036      | 15.970                            | 20.030      |

**Overall Comparisons**

|                       | Chi-Square | df | Sig. |
|-----------------------|------------|----|------|
| Log Rank (Mantel-Cox) | .032       | 1  | .857 |

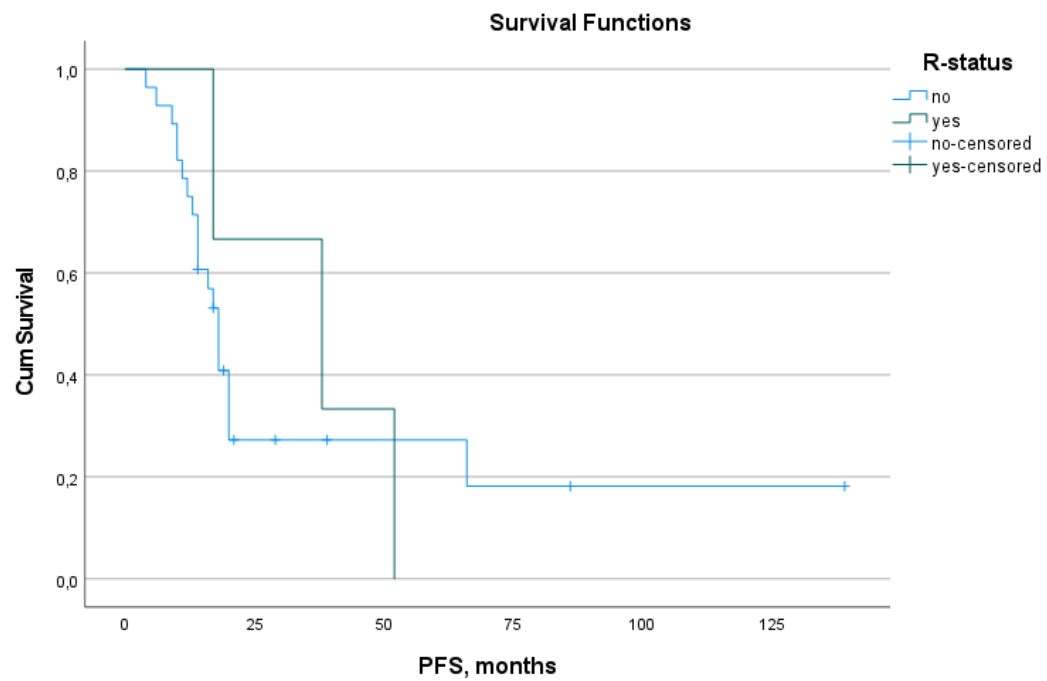

Supplement: s1 [file s1]
