# Supplementary material for: Hemodynamic, Surgical and Oncological Outcomes of 40 Distal Pancreatectomies with Celiac and Left Gastric Arteries Resection (DP CAR) without Arterial Reconstructions and Preoperative Embolization
Source: MDPI journal article supplement (doi:10.3390/cancers14051254), 2022-02-28

File S2. Statistics. Part 2. Pancreatic ductal adenocarcinoma patients' survival.  
Frequencies

| Dindo-C |       |           |          |               |
|---------|-------|-----------|----------|---------------|
|         |       | Frequency | Per cent | Valid Percent |
| Valid   | 0     | 22        | 71.0     | 71.0          |
|         | 1     | 3         | 9.7      | 9.7           |
|         | 2     | 6         | 19.4     | 19.4          |
|         | Total | 31        | 100.0    | 100.0         |

Frequencies

| LN. involved |       |           |          |               |
|--------------|-------|-----------|----------|---------------|
|              |       | Frequency | Per cent | Valid Percent |
| Valid        | 0     | 7         | 22.6     | 22.6          |
|              | 1     | 17        | 54.8     | 54.8          |
|              | 2     | 7         | 22.6     | 22.6          |
|              | Total | 31        | 100.0    | 100.0         |

Frequencies

| CA 19-9 before surgery |       |           |          |               |
|------------------------|-------|-----------|----------|---------------|
|                        |       | Frequency | Per cent | Valid Percent |
| Valid                  | <= 66 | 16        | 51.6     | 51.6          |
|                        | 67+   | 15        | 48.4     | 48.4          |
|                        | Total | 31        | 100.0    | 100.0         |

Frequencies

| Tumour size. Pathol. mm |       |           |          |               |
|-------------------------|-------|-----------|----------|---------------|
|                         |       | Frequency | Per cent | Valid Percent |
| Valid                   | <= 43 | 16        | 51.6     | 51.6          |
|                         | 44+   | 15        | 48.4     | 48.4          |
|                         | Total | 31        | 100.0    | 100.0         |

Kaplan-Meier

| Case Processing Summary |         |             |          |          |
|-------------------------|---------|-------------|----------|----------|
| CA 19-9 before surgery  | Total N | N of Events | Censored |          |
|                         |         |             | N        | Per cent |
| <= 66                   | 16      | 8           | 8        | 50.0%    |
| 67+                     | 15      | 12          | 3        | 20.0%    |
| Overall                 | 31      | 20          | 11       | 35.5%    |

| Survival Table         |    |         |        |                                             |            |                      |
|------------------------|----|---------|--------|---------------------------------------------|------------|----------------------|
| CA 19-9 before surgery |    | Time    | Status | Cumulative Proportion Surviving at the Time |            | N of Remaining Cases |
|                        |    |         |        | Estimate                                    | Std. Error |                      |
| <= 66                  | 1  | 13.000  | dead   | .938                                        | .061       | 15                   |
|                        | 2  | 14.000  | dead   | .875                                        | .083       | 14                   |
|                        | 3  | 17.000  | dead   | .813                                        | .098       | 13                   |
|                        | 4  | 19.000  | alive  | .                                           | .          | 12                   |
|                        | 5  | 21.000  | alive  | .                                           | .          | 11                   |
|                        | 6  | 25.000  | dead   | .                                           | .          | 10                   |
|                        | 7  | 25.000  | dead   | .665                                        | .124       | 9                    |
|                        | 8  | 29.000  | dead   | .591                                        | .130       | 8                    |
|                        | 9  | 29.000  | alive  | .                                           | .          | 7                    |
|                        | 10 | 29.000  | alive  | .                                           | .          | 6                    |
|                        | 11 | 31.000  | alive  | .                                           | .          | 5                    |
|                        | 12 | 32.000  | alive  | .                                           | .          | 4                    |
|                        | 13 | 39.000  | alive  | .                                           | .          | 3                    |
|                        | 14 | 48.000  | dead   | .394                                        | .183       | 2                    |
|                        | 15 | 71.000  | dead   | .197                                        | .167       | 1                    |
|                        | 16 | 139.000 | alive  | .                                           | .          | 0                    |
| 67+                    | 1  | 6000    | dead   | .933                                        | .064       | 14                   |
|                        | 2  | 11.000  | dead   | .867                                        | .088       | 13                   |
|                        | 3  | 13.000  | dead   | .800                                        | .103       | 12                   |
|                        | 4  | 20.000  | dead   | .                                           | .          | 11                   |
|                        | 5  | 20.000  | dead   | .667                                        | .122       | 10                   |
|                        | 6  | 21.000  | dead   | .                                           | .          | 9                    |
|                        | 7  | 21.000  | dead   | .533                                        | .129       | 8                    |
|                        | 8  | 22.000  | dead   | .467                                        | .129       | 7                    |
|                        | 9  | 24.000  | dead   | .400                                        | .126       | 6                    |
|                        | 10 | 30.000  | dead   | .333                                        | .122       | 5                    |
|                        | 11 | 33.000  | alive  | .                                           | .          | 4                    |
|                        | 12 | 39.000  | dead   | .250                                        | .116       | 3                    |
|                        | 13 | 66.000  | dead   | .167                                        | .103       | 2                    |
|                        | 14 | 79.000  | alive  | .                                           | .          | 1                    |
|                        | 15 | 86.000  | alive  | .                                           | .          | 0                    |

CA 19-9 before surgery Means and Medians for Survival Time .198

> 66 – 48 [95%CI:13.45;82.549]. >66 – 22[95%CI:18.2;25.8]

| CA 19-9 before surgery | Mean                    | Median                  |
|------------------------|-------------------------|-------------------------|
| CT                     | 95% Confidence Interval | 95% Confidence Interval |

|         | Estimate | Std. Error | Lower Bound | Upper Bound | Estimate | Std. Error | Lower Bound | Upper Bound |
|---------|----------|------------|-------------|-------------|----------|------------|-------------|-------------|
| <= 66   | 59.403   | 15.655     | 28.720      | 90.087      | 48.000   | 17.627     | 13.451      | 82.549      |
| 67+     | 35.617   | 7068       | 21.763      | 49.470      | 22.000   | 1932       | 18.213      | 25.787      |
| Overall | 52.865   | 9885       | 33.490      | 72.240      | 29.000   | 6795       | 15.681      | 42.319      |

#### Overall Comparisons

|                       | Chi-Square | df | Sig. |
|-----------------------|------------|----|------|
| Log Rank (Mantel-Cox) | 1655       | 1  | .198 |

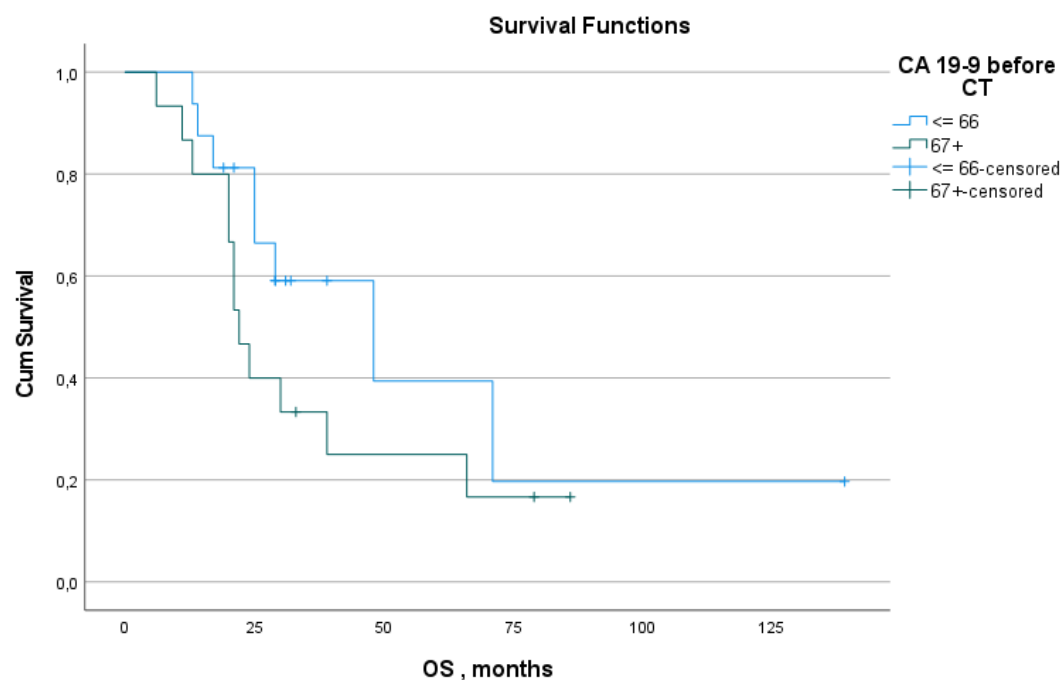

CA 19-9 before surgery= CA 19-9 before CT (mistake in writing)

Kaplan-Meier

#### Case Processing Summary

| Tumour size. Pathol. mm | Total N | N of Events | Censored |          |
|-------------------------|---------|-------------|----------|----------|
|                         |         |             | N        | Per cent |
| <= 43                   | 16      | 10          | 6        | 37.5%    |
| 44+                     | 15      | 10          | 5        | 33.3%    |
| Overall                 | 31      | 20          | 11       | 35.5%    |

#### Survival Table

| Survival Table       |   |        |                                                |          |                              |                            |
|----------------------|---|--------|------------------------------------------------|----------|------------------------------|----------------------------|
| Tumour size. Pathol. |   |        | Cumulative Proportion<br>Surviving at the Time |          | N of<br>Cumulative<br>Events | N of<br>Remaining<br>Cases |
| mm                   |   | Time   | Status                                         | Estimate | Std. Error                   |                            |
| <= 43                | 1 | 6000   | dead                                           | .938     | .061                         | 1                          |
|                      | 2 | 13.000 | dead                                           | .875     | .083                         | 2                          |
|                      | 3 | 14.000 | dead                                           | .813     | .098                         | 3                          |

|     |    |         |       |      |      |    |    |
|-----|----|---------|-------|------|------|----|----|
|     | 4  | 20.000  | dead  | .    | .    | 4  | 12 |
|     | 5  | 20.000  | dead  | .688 | .116 | 5  | 11 |
|     | 6  | 21.000  | dead  | .625 | .121 | 6  | 10 |
|     | 7  | 21.000  | alive | .    | .    | 6  | 9  |
|     | 8  | 25.000  | dead  | .    | .    | 7  | 8  |
|     | 9  | 25.000  | dead  | .486 | .128 | 8  | 7  |
|     | 10 | 29.000  | dead  | .417 | .127 | 9  | 6  |
|     | 11 | 29.000  | alive | .    | .    | 9  | 5  |
|     | 12 | 31.000  | alive | .    | .    | 9  | 4  |
|     | 13 | 32.000  | alive | .    | .    | 9  | 3  |
|     | 14 | 39.000  | alive | .    | .    | 9  | 2  |
|     | 15 | 48.000  | dead  | .208 | .160 | 10 | 1  |
|     | 16 | 139.000 | alive | .    | .    | 10 | 0  |
| 44+ | 1  | 11.000  | dead  | .933 | .064 | 1  | 14 |
|     | 2  | 13.000  | dead  | .867 | .088 | 2  | 13 |
|     | 3  | 17.000  | dead  | .800 | .103 | 3  | 12 |
|     | 4  | 19.000  | alive | .    | .    | 3  | 11 |
|     | 5  | 21.000  | dead  | .727 | .117 | 4  | 10 |
|     | 6  | 22.000  | dead  | .655 | .126 | 5  | 9  |
|     | 7  | 24.000  | dead  | .582 | .131 | 6  | 8  |
|     | 8  | 29.000  | alive | .    | .    | 6  | 7  |
|     | 9  | 30.000  | dead  | .499 | .136 | 7  | 6  |
|     | 10 | 33.000  | alive | .    | .    | 7  | 5  |
|     | 11 | 39.000  | dead  | .399 | .141 | 8  | 4  |
|     | 12 | 66.000  | dead  | .299 | .136 | 9  | 3  |
|     | 13 | 71.000  | dead  | .199 | .122 | 10 | 2  |
|     | 14 | 79.000  | alive | .    | .    | 10 | 1  |
|     | 15 | 86.000  | alive | .    | .    | 10 | 0  |

#### Tumor size. pathol Means and Medians for Survival Time .721

< 43 – 25 [95%CI:15.37;34.63]. >43 - 30[95%CI;8.1;51.89]

| Tumour<br>Pathol. mm | size. | Mean         |               |                            |                | Median       |               |                         |                |
|----------------------|-------|--------------|---------------|----------------------------|----------------|--------------|---------------|-------------------------|----------------|
|                      |       | Estimat<br>e | Std.<br>Error | 95% Confidence<br>Interval |                | Estimat<br>e | Std.<br>Error | 95% Confidence Interval |                |
|                      |       |              |               | Lower<br>Bound             | Upper<br>Bound |              |               | Lower<br>Bound          | Upper<br>Bound |
|                      |       |              |               |                            |                |              |               |                         |                |
| <= 43                |       | 50.319       | 16.400        | 18.175                     | 82.464         | 25.000       | 4912          | 15.372                  | 34.628         |
| 44+                  |       | 44.809       | 7769          | 29.583                     | 60.036         | 30.000       | 11.171        | 8105                    | 51.895         |
| Overall              |       | 52.865       | 9885          | 33.490                     | 72.240         | 29.000       | 6795          | 15.681                  | 42.319         |

#### Overall Comparisons

|                       | Chi-Square | df | Sig. |
|-----------------------|------------|----|------|
| Log Rank (Mantel-Cox) | .127       | 1  | .721 |

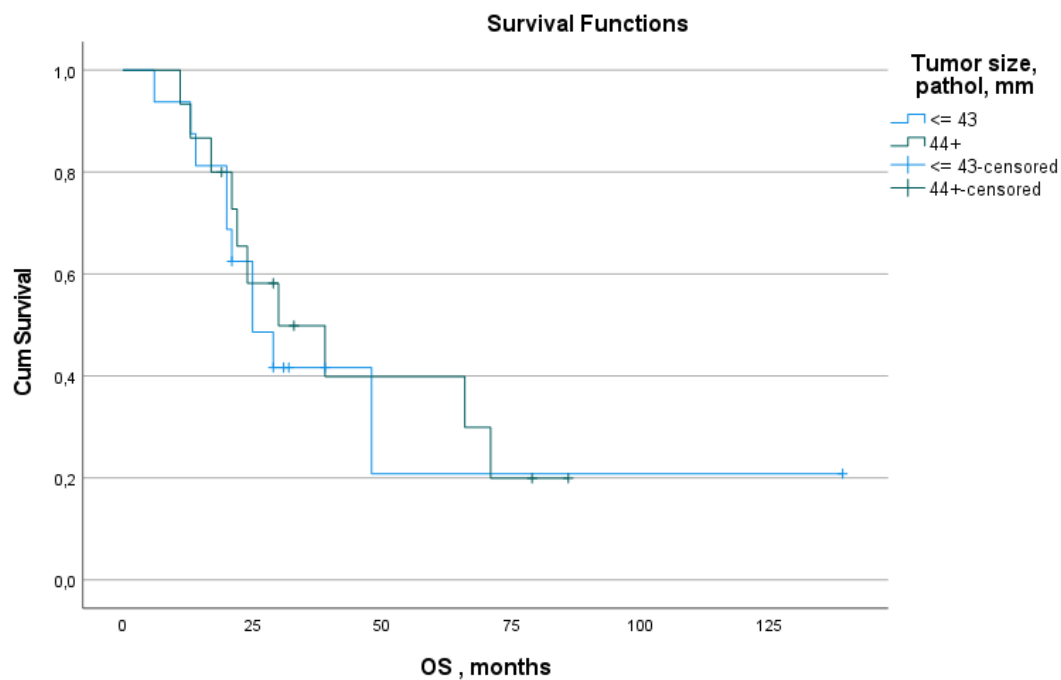

Kaplan-Meier

#### Case Processing Summary

| Dindo-C | Total N | N of Events | Censored |          |
|---------|---------|-------------|----------|----------|
|         |         |             | N        | Per cent |
| 0       | 22      | 14          | 8        | 36.4%    |
| 1       | 4       | 2           | 2        | 50.0%    |
| 2       | 5       | 4           | 1        | 20.0%    |
| Overall | 31      | 20          | 11       | 35.5%    |

#### Survival Table

| Survival Table |      |        |                                                |            |                              |                         |    |
|----------------|------|--------|------------------------------------------------|------------|------------------------------|-------------------------|----|
|                |      |        | Cumulative Proportion<br>Surviving at the Time |            | N of<br>Cumulative<br>Events | N of Remaining<br>Cases |    |
| Dindo-C        | Time | Status | Estimate                                       | Std. Error |                              |                         |    |
| 0              | 1    | 11.000 | dead                                           | .955       | .044                         | 1                       | 21 |
|                | 2    | 13.000 | dead                                           | .          | .                            | 2                       | 20 |
|                | 3    | 13.000 | dead                                           | .864       | .073                         | 3                       | 19 |
|                | 4    | 19.000 | alive                                          | .          | .                            | 3                       | 18 |
|                | 5    | 20.000 | dead                                           | .816       | .083                         | 4                       | 17 |
|                | 6    | 21.000 | dead                                           | .          | .                            | 5                       | 16 |
|                | 7    | 21.000 | dead                                           | .720       | .097                         | 6                       | 15 |
|                | 8    | 21.000 | alive                                          | .          | .                            | 6                       | 14 |
|                | 9    | 24.000 | dead                                           | .668       | .103                         | 7                       | 13 |

|   |    |         |       |      |      |    |    |
|---|----|---------|-------|------|------|----|----|
|   | 10 | 25.000  | dead  | .    | .    | 8  | 12 |
|   | 11 | 25.000  | dead  | .565 | .110 | 9  | 11 |
|   | 12 | 29.000  | dead  | .514 | .111 | 10 | 10 |
|   | 13 | 29.000  | alive | .    | .    | 10 | 9  |
|   | 14 | 29.000  | alive | .    | .    | 10 | 8  |
|   | 15 | 30.000  | dead  | .450 | .114 | 11 | 7  |
|   | 16 | 32.000  | alive | .    | .    | 11 | 6  |
|   | 17 | 33.000  | alive | .    | .    | 11 | 5  |
|   | 18 | 39.000  | dead  | .360 | .122 | 12 | 4  |
|   | 19 | 39.000  | alive | .    | .    | 12 | 3  |
|   | 20 | 66.000  | dead  | .240 | .127 | 13 | 2  |
|   | 21 | 71.000  | dead  | .120 | .106 | 14 | 1  |
|   | 22 | 139.000 | alive | .    | .    | 14 | 0  |
| 1 | 1  | 17.000  | dead  | .750 | .217 | 1  | 3  |
|   | 2  | 31.000  | alive | .    | .    | 1  | 2  |
|   | 3  | 48.000  | dead  | .375 | .286 | 2  | 1  |
|   | 4  | 86.000  | alive | .    | .    | 2  | 0  |
| 2 | 1  | 6000    | dead  | .800 | .179 | 1  | 4  |
|   | 2  | 14.000  | dead  | .600 | .219 | 2  | 3  |
|   | 3  | 20.000  | dead  | .400 | .219 | 3  | 2  |
|   | 4  | 22.000  | dead  | .200 | .179 | 4  | 1  |
|   | 5  | 79.000  | alive | .    | .    | 4  | 0  |

#### Means and Medians for Survival Time.425

| Dindo-C | Estimate | Std. Error | Mean<br>95% Confidence Interval |             | Estimate | Std. Error | Median<br>95% Confidence Interval |             |
|---------|----------|------------|---------------------------------|-------------|----------|------------|-----------------------------------|-------------|
|         |          |            | Lower Bound                     | Upper Bound |          |            | Lower Bound                       | Upper Bound |
| 0       | 48.494   | 10.613     | 27.693                          | 69.295      | 30.000   | 4947       | 20.305                            | 39.695      |
| 1       | 54.500   | 14.789     | 25.513                          | 83.487      | 48.000   | 23.677     | 1594                              | 94.406      |
| 2       | 28.200   | 11.629     | 5407                            | 50.993      | 20.000   | 6573       | 7118                              | 32.882      |
| Overall | 52.865   | 9885       | 33.490                          | 72.240      | 29.000   | 6795       | 15.681                            | 42.319      |

#### Overall Comparisons

|                       | Chi-Square | df | Sig. |
|-----------------------|------------|----|------|
| Log Rank (Mantel-Cox) | 1713       | 2  | .425 |

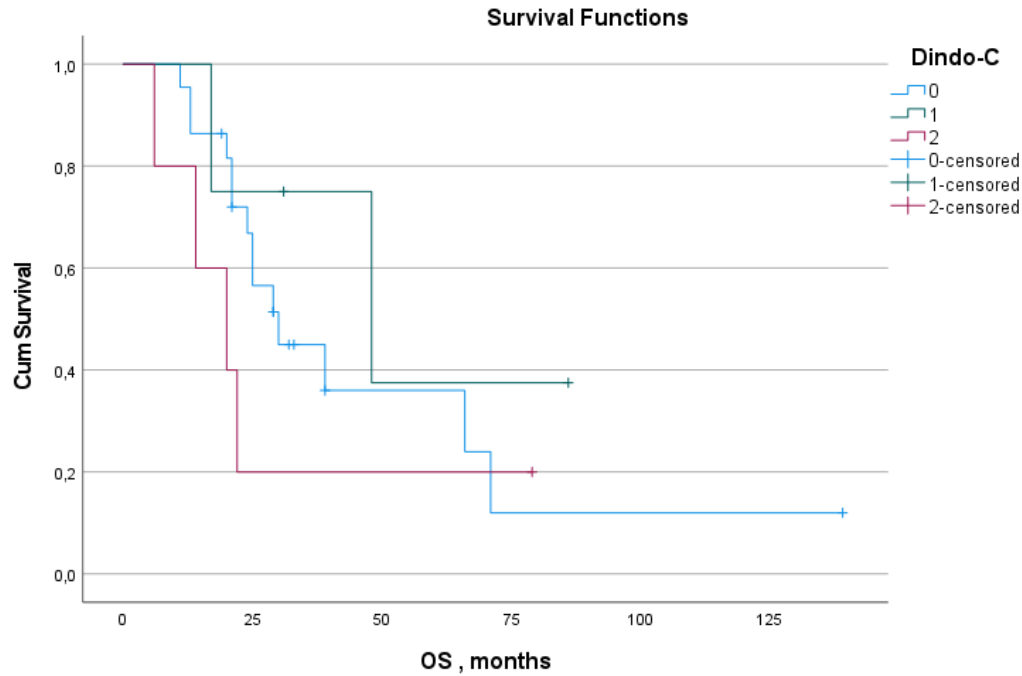

Kaplan-Meier

**Case Processing Summary**

| LN. involved | Total N | N of Events | Censored |          |
|--------------|---------|-------------|----------|----------|
|              |         |             | N        | Per cent |
| 0            | 7       | 1           | 6        | 85.7%    |
| 1            | 17      | 14          | 3        | 17.6%    |
| 2            | 7       | 5           | 2        | 28.6%    |
| Overall      | 31      | 20          | 11       | 35.5%    |

**Survival Table**

|              |      |         |          | Cumulative Proportion<br>Surviving at the Time |      | N of<br>Cumulative<br>Events | N of Remaining<br>Cases |
|--------------|------|---------|----------|------------------------------------------------|------|------------------------------|-------------------------|
| LN. involved | Time | Status  | Estimate | Std. Error                                     |      |                              |                         |
| 0            | 1    | 14.000  | dead     | .857                                           | .132 | 1                            | 6                       |
|              | 2    | 19.000  | alive    | .                                              | .    | 1                            | 5                       |
|              | 3    | 21.000  | alive    | .                                              | .    | 1                            | 4                       |
|              | 4    | 31.000  | alive    | .                                              | .    | 1                            | 3                       |
|              | 5    | 39.000  | alive    | .                                              | .    | 1                            | 2                       |
|              | 6    | 86.000  | alive    | .                                              | .    | 1                            | 1                       |
|              | 7    | 139.000 | alive    | .                                              | .    | 1                            | 0                       |
| 1            | 1    | 11.000  | dead     | .941                                           | .057 | 1                            | 16                      |
|              | 2    | 13.000  | dead     | .                                              | .    | 2                            | 15                      |
|              | 3    | 13.000  | dead     | .824                                           | .092 | 3                            | 14                      |
|              | 4    | 17.000  | dead     | .765                                           | .103 | 4                            | 13                      |
|              | 5    | 20.000  | dead     | .                                              | .    | 5                            | 12                      |

|   |    |        |       |      |      |    |    |
|---|----|--------|-------|------|------|----|----|
|   | 6  | 20.000 | dead  | .647 | .116 | 6  | 11 |
|   | 7  | 21.000 | dead  | .588 | .119 | 7  | 10 |
|   | 8  | 22.000 | dead  | .529 | .121 | 8  | 9  |
|   | 9  | 25.000 | dead  | .    | .    | 9  | 8  |
|   | 10 | 25.000 | dead  | .412 | .119 | 10 | 7  |
|   | 11 | 29.000 | dead  | .353 | .116 | 11 | 6  |
|   | 12 | 29.000 | alive | .    | .    | 11 | 5  |
|   | 13 | 32.000 | alive | .    | .    | 11 | 4  |
|   | 14 | 33.000 | alive | .    | .    | 11 | 3  |
|   | 15 | 39.000 | dead  | .235 | .123 | 12 | 2  |
|   | 16 | 48.000 | dead  | .118 | .104 | 13 | 1  |
|   | 17 | 71.000 | dead  | .000 | .000 | 14 | 0  |
| 2 | 1  | 6000   | dead  | .857 | .132 | 1  | 6  |
|   | 2  | 21.000 | dead  | .714 | .171 | 2  | 5  |
|   | 3  | 24.000 | dead  | .571 | .187 | 3  | 4  |
|   | 4  | 29.000 | alive | .    | .    | 3  | 3  |
|   | 5  | 30.000 | dead  | .381 | .199 | 4  | 2  |
|   | 6  | 66.000 | dead  | .190 | .168 | 5  | 1  |
|   | 7  | 79.000 | alive | .    | .    | 5  | 0  |

LN involved Means and Medians for Survival Time .047

| LN.<br>involved | Estimate | Std.<br>Error | Mean<br>95% Confidence Interval |                | Estimate | Std.<br>Error | Median<br>95% Confidence Interval |                |
|-----------------|----------|---------------|---------------------------------|----------------|----------|---------------|-----------------------------------|----------------|
|                 |          |               | Lower<br>Bound                  | Upper<br>Bound |          |               | Lower<br>Bound                    | Upper<br>Bound |
| 0               | 121.143  | 16.533        | 88.739                          | 153.547        | .        | .             | .                                 | .              |
| 1               | 31.294   | 5010          | 21.474                          | 41.114         | 25.000   | 2706          | 19.697                            | 30.303         |
| 2               | 40.619   | 10.503        | 20.032                          | 61.206         | 30.000   | 6279          | 17.693                            | 42.307         |
| Overall         | 52.865   | 9885          | 33.490                          | 72.240         | 29.000   | 6795          | 15.681                            | 42.319         |

Overall Comparisons

|                       | Chi-Square | df | Sig. |
|-----------------------|------------|----|------|
| Log Rank (Mantel-Cox) | 6111       | 2  | .047 |



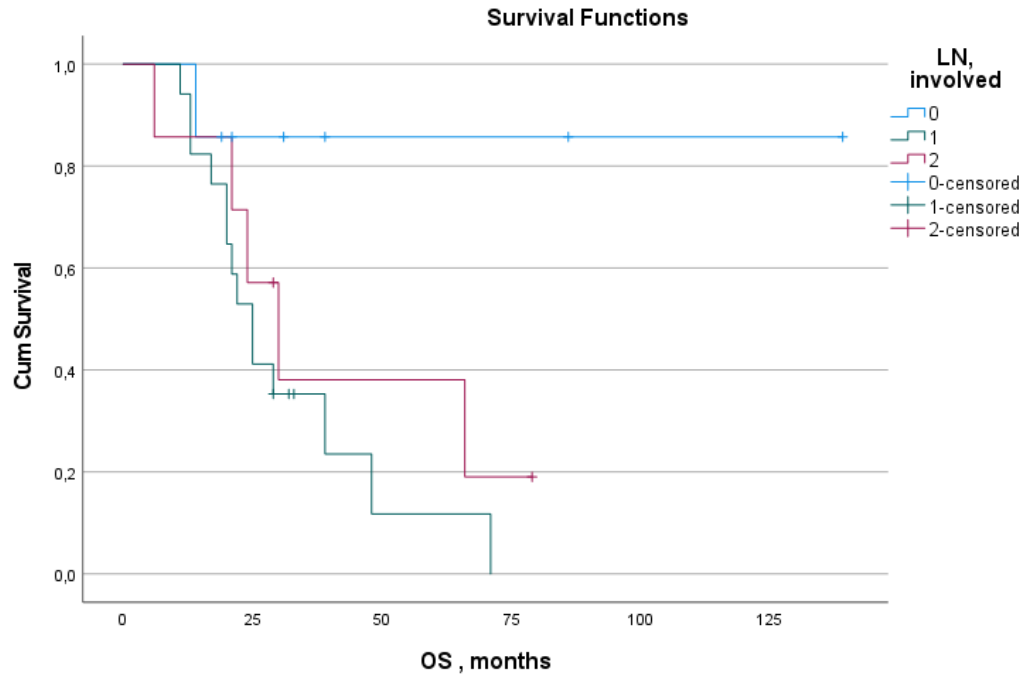

Frequencies

|       |     | LN. involved |          |               | Cumulative<br>Percent |
|-------|-----|--------------|----------|---------------|-----------------------|
|       |     | Frequency    | Per cent | Valid Percent |                       |
| Valid | No  | 7            | 22.6     | 22.6          | 22.6                  |
|       | Yes | 24           | 77.4     | 77.4          | 100.0                 |
| Total |     | 31           | 100.0    | 100.0         |                       |

Kaplan-Meier

**Case Processing Summary**

| LN. involved | Total N | N of Events | Censored |          |
|--------------|---------|-------------|----------|----------|
|              |         |             | N        | Per cent |
| No           | 7       | 1           | 6        | 85.7%    |
| Yes          | 24      | 19          | 5        | 20.8%    |
| Overall      | 31      | 20          | 11       | 35.5%    |

**Survival Table**

|              |      |        | Cumulative Proportion<br>Surviving at the Time |            | N of<br>Cumulative<br>Events | N of Remaining<br>Cases |   |
|--------------|------|--------|------------------------------------------------|------------|------------------------------|-------------------------|---|
| LN. involved | Time | Status | Estimate                                       | Std. Error |                              |                         |   |
| No           | 1    | 14.000 | dead                                           | .857       | .132                         | 1                       | 6 |
|              | 2    | 19.000 | alive                                          | .          | .                            | 1                       | 5 |
|              | 3    | 21.000 | alive                                          | .          | .                            | 1                       | 4 |
|              | 4    | 31.000 | alive                                          | .          | .                            | 1                       | 3 |
|              | 5    | 39.000 | alive                                          | .          | .                            | 1                       | 2 |
|              | 6    | 86.000 | alive                                          | .          | .                            | 1                       | 1 |

|     |    |         |       |      |      |    |    |
|-----|----|---------|-------|------|------|----|----|
|     | 7  | 139.000 | alive | .    | .    | 1  | 0  |
| Yes | 1  | 6000    | dead  | .958 | .041 | 1  | 23 |
|     | 2  | 11.000  | dead  | .917 | .056 | 2  | 22 |
|     | 3  | 13.000  | dead  | .    | .    | 3  | 21 |
|     | 4  | 13.000  | dead  | .833 | .076 | 4  | 20 |
|     | 5  | 17.000  | dead  | .792 | .083 | 5  | 19 |
|     | 6  | 20.000  | dead  | .    | .    | 6  | 18 |
|     | 7  | 20.000  | dead  | .708 | .093 | 7  | 17 |
|     | 8  | 21.000  | dead  | .    | .    | 8  | 16 |
|     | 9  | 21.000  | dead  | .625 | .099 | 9  | 15 |
|     | 10 | 22.000  | dead  | .583 | .101 | 10 | 14 |
|     | 11 | 24.000  | dead  | .542 | .102 | 11 | 13 |
|     | 12 | 25.000  | dead  | .    | .    | 12 | 12 |
|     | 13 | 25.000  | dead  | .458 | .102 | 13 | 11 |
|     | 14 | 29.000  | dead  | .417 | .101 | 14 | 10 |
|     | 15 | 29.000  | alive | .    | .    | 14 | 9  |
|     | 16 | 29.000  | alive | .    | .    | 14 | 8  |
|     | 17 | 30.000  | dead  | .365 | .101 | 15 | 7  |
|     | 18 | 32.000  | alive | .    | .    | 15 | 6  |
|     | 19 | 33.000  | alive | .    | .    | 15 | 5  |
|     | 20 | 39.000  | dead  | .292 | .104 | 16 | 4  |
|     | 21 | 48.000  | dead  | .219 | .100 | 17 | 3  |
|     | 22 | 66.000  | dead  | .146 | .089 | 18 | 2  |
|     | 23 | 71.000  | dead  | .073 | .068 | 19 | 1  |
|     | 24 | 79.000  | alive | .    | .    | 19 | 0  |

**Means and Medians for Survival Time .023 N- - не достигнута. N+ - 25 [95%CI:16.6;33.37]**

| LN.<br>involved | Estimate | Std.<br>Error | Mean<br>95% Confidence Interval |                | Estimate | Std.<br>Error | Median<br>95% Confidence Interval |                |
|-----------------|----------|---------------|---------------------------------|----------------|----------|---------------|-----------------------------------|----------------|
|                 |          |               | Lower<br>Bound                  | Upper<br>Bound |          |               | Lower<br>Bound                    | Upper<br>Bound |
| No              | 121.143  | 16.533        | 88.739                          | 153.547        | .        | .             | .                                 | .              |
| Yes             | 34.781   | 4836          | 25.303                          | 44.259         | 25.000   | 4272          | 16.627                            | 33.373         |
| Overall         | 52.865   | 9885          | 33.490                          | 72.240         | 29.000   | 6795          | 15.681                            | 42.319         |

#### Overall Comparisons

|                       | Chi-Square | df | Sig. |
|-----------------------|------------|----|------|
| Log Rank (Mantel-Cox) | 5174       | 1  | .023 |

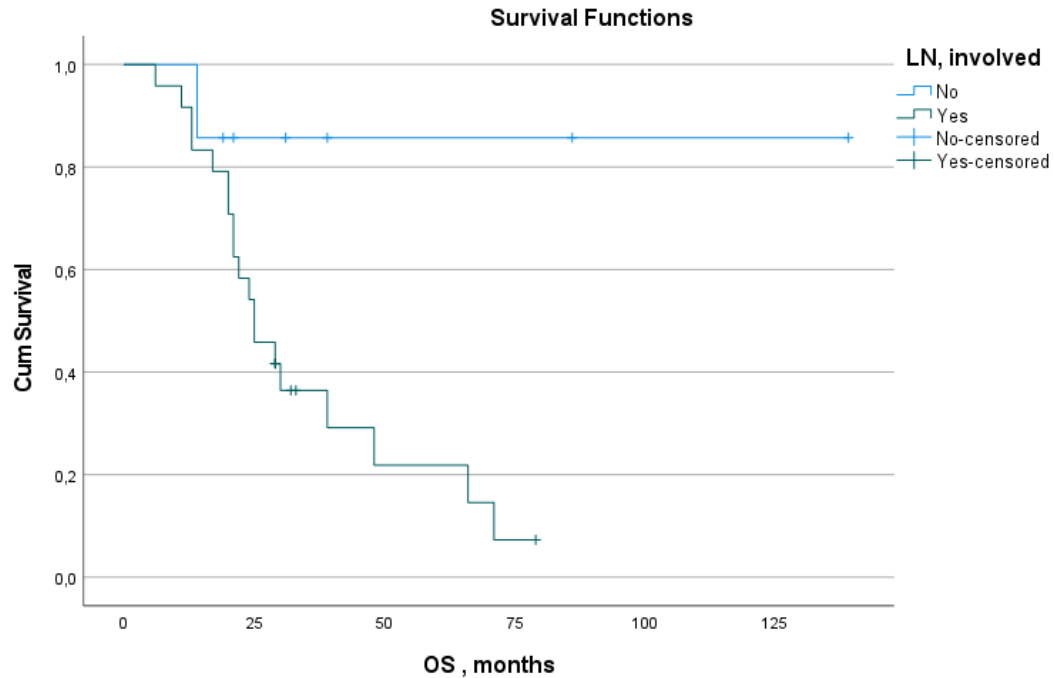

Kaplan-Meier

**Case Processing Summary**

| CA 19-9 before surgery | Total N | N of Events | Censored |          |
|------------------------|---------|-------------|----------|----------|
|                        |         |             | N        | Per cent |
| <= 66                  | 16      | 9           | 7        | 43.8%    |
| 67+                    | 15      | 14          | 1        | 6.7%     |
| Overall                | 31      | 23          | 8        | 25.8%    |

**Survival Table**

| CA 19-9 before surgery | Time | Status | Cumulative Proportion Surviving at the Time |            | N of Cumulative Events | N of Remaining Cases |
|------------------------|------|--------|---------------------------------------------|------------|------------------------|----------------------|
|                        |      |        | Estimate                                    | Std. Error |                        |                      |
| <= 66                  | 1    | 10.000 | yes                                         | .          | 1                      | 15                   |
|                        | 2    | 10.000 | yes                                         | .875       | .083                   | 14                   |
|                        | 3    | 11.000 | yes                                         | .813       | .098                   | 13                   |
|                        | 4    | 14.000 | yes                                         | .750       | .108                   | 12                   |
|                        | 5    | 14.000 | no                                          | .          | .                      | 11                   |
|                        | 6    | 17.000 | no                                          | .          | .                      | 10                   |
|                        | 7    | 18.000 | yes                                         | .675       | .121                   | 9                    |
|                        | 8    | 19.000 | no                                          | .          | .                      | 8                    |
|                        | 9    | 20.000 | yes                                         | .          | .                      | 7                    |
|                        | 10   | 20.000 | yes                                         | .          | .                      | 6                    |
|                        | 11   | 20.000 | yes                                         | .422       | .138                   | 5                    |
|                        | 12   | 21.000 | no                                          | .          | .                      | 4                    |

|     |    |         |     |      |      |    |    |
|-----|----|---------|-----|------|------|----|----|
|     | 13 | 29.000  | no  | .    | .    | 8  | 3  |
|     | 14 | 39.000  | no  | .    | .    | 8  | 2  |
|     | 15 | 66.000  | yes | .211 | .164 | 9  | 1  |
|     | 16 | 139.000 | no  | .    | .    | 9  | 0  |
| 67+ | 1  | 4000    | yes | .933 | .064 | 1  | 14 |
|     | 2  | 6000    | yes | .867 | .088 | 2  | 13 |
|     | 3  | 9000    | yes | .800 | .103 | 3  | 12 |
|     | 4  | 12.000  | yes | .733 | .114 | 4  | 11 |
|     | 5  | 13.000  | yes | .667 | .122 | 5  | 10 |
|     | 6  | 14.000  | yes | .    | .    | 6  | 9  |
|     | 7  | 14.000  | yes | .533 | .129 | 7  | 8  |
|     | 8  | 16.000  | yes | .467 | .129 | 8  | 7  |
|     | 9  | 17.000  | yes | .    | .    | 9  | 6  |
|     | 10 | 17.000  | yes | .333 | .122 | 10 | 5  |
|     | 11 | 18.000  | yes | .    | .    | 11 | 4  |
|     | 12 | 18.000  | yes | .200 | .103 | 12 | 3  |
|     | 13 | 38.000  | yes | .133 | .088 | 13 | 2  |
|     | 14 | 52.000  | yes | .067 | .064 | 14 | 1  |
|     | 15 | 86.000  | no  | .    | .    | 14 | 0  |

#### Means and Medians for Survival Time .038

<= 66 – 20 [95%CI:17.86;22.14] . >66 – 16 [95%:12.97;19.03]

| CA 19-9 before surgery | Estimate | Std. Error | Mean<br>95% Confidence Interval |             | Estimate | Std. Error | Median<br>95% Confidence Interval |             |
|------------------------|----------|------------|---------------------------------|-------------|----------|------------|-----------------------------------|-------------|
|                        |          |            | Lower Bound                     | Upper Bound |          |            | Lower Bound                       | Upper Bound |
| <= 66                  | 52.467   | 16.105     | 20.902                          | 84.033      | 20.000   | 1090       | 17.863                            | 22.137      |
| 67+                    | 22.267   | 5345       | 11.791                          | 32.742      | 16.000   | 1546       | 12.970                            | 19.030      |
| Overall                | 37.879   | 8951       | 20.334                          | 55.423      | 18.000   | 1036       | 15.970                            | 20.030      |

#### Overall Comparisons

|                       | Chi-Square | df | Sig. |
|-----------------------|------------|----|------|
| Log Rank (Mantel-Cox) | 4316       | 1  | .038 |

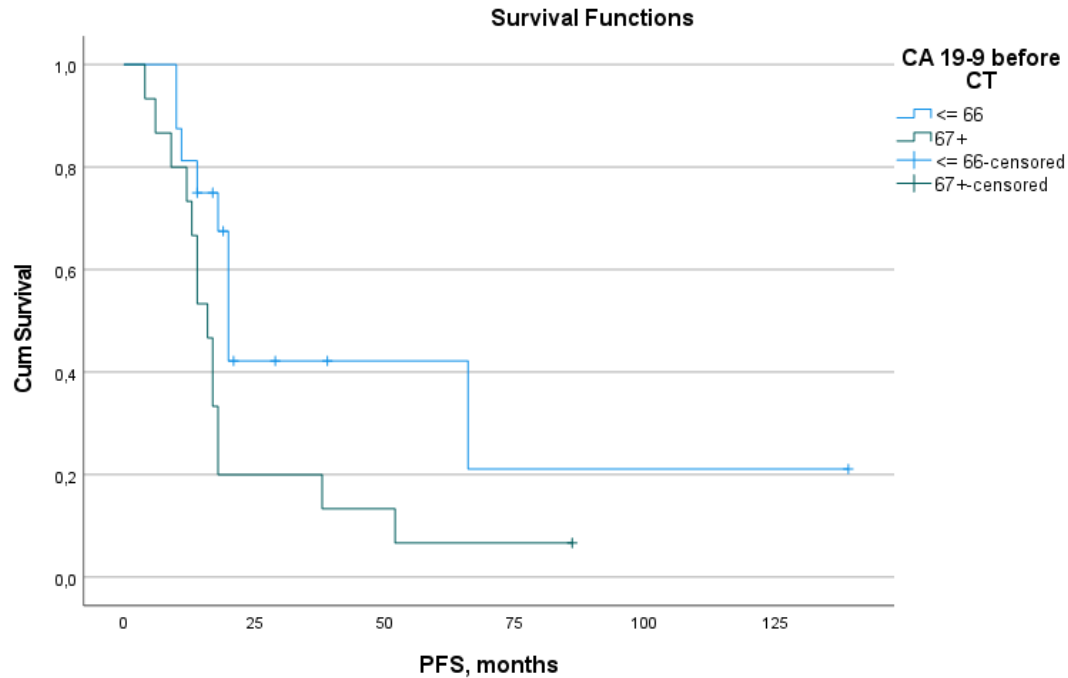

Kaplan-Meier

**Case Processing Summary**

| Tumour size. Pathol. mm | Total N | N of Events | Censored |          |
|-------------------------|---------|-------------|----------|----------|
|                         |         |             | N        | Per cent |
| <= 43                   | 16      | 12          | 4        | 25.0%    |
| 44+                     | 15      | 11          | 4        | 26.7%    |
| Overall                 | 31      | 23          | 8        | 25.8%    |

**Survival Table**

| Tumour size. Pathol. mm |    | Time   | Status | Cumulative Proportion Surviving at the Time |            | N of Cumulative Events | N of Remaining Cases |
|-------------------------|----|--------|--------|---------------------------------------------|------------|------------------------|----------------------|
|                         |    |        |        | Estimate                                    | Std. Error |                        |                      |
| <= 43                   | 1  | 4000   | yes    | .938                                        | .061       | 1                      | 15                   |
|                         | 2  | 10.000 | yes    | .                                           | .          | 2                      | 14                   |
|                         | 3  | 10.000 | yes    | .813                                        | .098       | 3                      | 13                   |
|                         | 4  | 11.000 | yes    | .750                                        | .108       | 4                      | 12                   |
|                         | 5  | 14.000 | yes    | .                                           | .          | 5                      | 11                   |
|                         | 6  | 14.000 | yes    | .625                                        | .121       | 6                      | 10                   |
|                         | 7  | 14.000 | no     | .                                           | .          | 6                      | 9                    |
|                         | 8  | 16.000 | yes    | .556                                        | .126       | 7                      | 8                    |
|                         | 9  | 18.000 | yes    | .                                           | .          | 8                      | 7                    |
|                         | 10 | 18.000 | yes    | .417                                        | .127       | 9                      | 6                    |
|                         | 11 | 20.000 | yes    | .                                           | .          | 10                     | 5                    |
|                         | 12 | 20.000 | yes    | .                                           | .          | 11                     | 4                    |

|     |    |         |     |      |      |    |    |
|-----|----|---------|-----|------|------|----|----|
|     | 13 | 20.000  | yes | .208 | .106 | 12 | 3  |
|     | 14 | 21.000  | no  | .    | .    | 12 | 2  |
|     | 15 | 39.000  | no  | .    | .    | 12 | 1  |
|     | 16 | 139.000 | no  | .    | .    | 12 | 0  |
| 44+ | 1  | 6000    | yes | .933 | .064 | 1  | 14 |
|     | 2  | 9000    | yes | .867 | .088 | 2  | 13 |
|     | 3  | 12.000  | yes | .800 | .103 | 3  | 12 |
|     | 4  | 13.000  | yes | .733 | .114 | 4  | 11 |
|     | 5  | 14.000  | yes | .667 | .122 | 5  | 10 |
|     | 6  | 17.000  | yes | .    | .    | 6  | 9  |
|     | 7  | 17.000  | yes | .533 | .129 | 7  | 8  |
|     | 8  | 17.000  | no  | .    | .    | 7  | 7  |
|     | 9  | 18.000  | yes | .457 | .131 | 8  | 6  |
|     | 10 | 19.000  | no  | .    | .    | 8  | 5  |
|     | 11 | 29.000  | no  | .    | .    | 8  | 4  |
|     | 12 | 38.000  | yes | .343 | .139 | 9  | 3  |
|     | 13 | 52.000  | yes | .229 | .132 | 10 | 2  |
|     | 14 | 66.000  | yes | .114 | .104 | 11 | 1  |
|     | 15 | 86.000  | no  | .    | .    | 11 | 0  |

Tumor size. pathol. mm **Means and Medians for Survival Time** .715 <43 – 18 [95%CI:14.41;21.59] . >43 – 18 [95%CI:0.00;37.03]

| [95 %CI:0.00,37.03] |          |                         |             |             |          |                         |             |             |  |
|---------------------|----------|-------------------------|-------------|-------------|----------|-------------------------|-------------|-------------|--|
|                     |          | Mean                    |             |             |          | Median                  |             |             |  |
|                     |          | 95% Confidence Interval |             |             |          | 95% Confidence Interval |             |             |  |
| Tumour size.        | Estimate | Std. Error              | Lower Bound | Upper Bound | Estimate | Std. Error              | Lower Bound | Upper Bound |  |
| Pathol. mm          |          |                         |             |             |          |                         |             |             |  |
| <= 43               | 40.674   | 13.196                  | 14.810      | 66.538      | 18.000   | 1830                    | 14.413      | 21.587      |  |
| 44+                 | 34.895   | 7412                    | 20.368      | 49.423      | 18.000   | 9711                    | .000        | 37.033      |  |
| Overall             | 37.879   | 8951                    | 20.334      | 55.423      | 18.000   | 1036                    | 15.970      | 20.030      |  |

#### Overall Comparisons

|                       | Chi-Square | df | Sig. |
|-----------------------|------------|----|------|
| Log Rank (Mantel-Cox) | .133       | 1  | .715 |

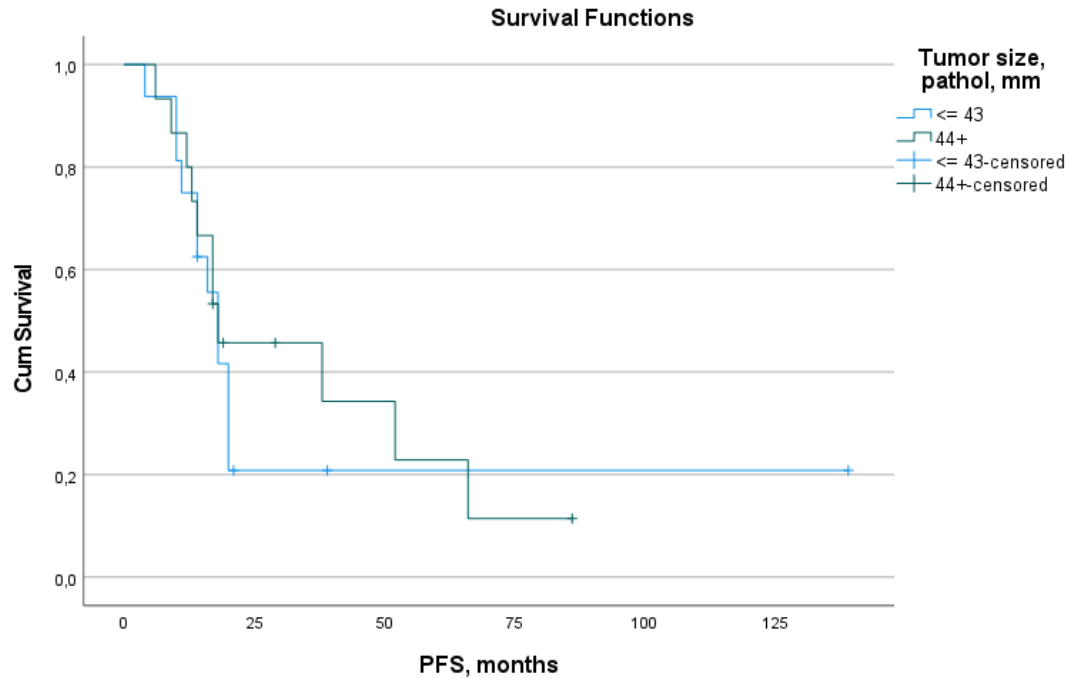

Kaplan-Meier

**Case Processing Summary**

| Dindo-C | Total N | N of Events | Censored |          |
|---------|---------|-------------|----------|----------|
|         |         |             | N        | Per cent |
| 0       | 22      | 17          | 5        | 22.7%    |
| 1       | 4       | 2           | 2        | 50.0%    |
| 2       | 5       | 4           | 1        | 20.0%    |
| Overall | 31      | 23          | 8        | 25.8%    |

**Survival Table**

|         |      |        | Cumulative Proportion<br>Surviving at the Time |            | N of<br>Cumulative<br>Events | N of Remaining<br>Cases |    |
|---------|------|--------|------------------------------------------------|------------|------------------------------|-------------------------|----|
| Dindo-C | Time | Status | Estimate                                       | Std. Error |                              |                         |    |
| 0       | 1    | 6000   | yes                                            | .955       | .044                         | 1                       | 21 |
|         | 2    | 9000   | yes                                            | .909       | .061                         | 2                       | 20 |
|         | 3    | 10.000 | yes                                            | .          | .                            | 3                       | 19 |
|         | 4    | 10.000 | yes                                            | .818       | .082                         | 4                       | 18 |
|         | 5    | 12.000 | yes                                            | .773       | .089                         | 5                       | 17 |
|         | 6    | 13.000 | yes                                            | .727       | .095                         | 6                       | 16 |
|         | 7    | 14.000 | yes                                            | .682       | .099                         | 7                       | 15 |
|         | 8    | 17.000 | yes                                            | .          | .                            | 8                       | 14 |
|         | 9    | 17.000 | yes                                            | .591       | .105                         | 9                       | 13 |
|         | 10   | 18.000 | yes                                            | .          | .                            | 10                      | 12 |
|         | 11   | 18.000 | yes                                            | .          | .                            | 11                      | 11 |
|         | 12   | 18.000 | yes                                            | .455       | .106                         | 12                      | 10 |

|   |    |         |     |      |      |    |   |
|---|----|---------|-----|------|------|----|---|
|   | 13 | 19.000  | no  | .    | .    | 12 | 9 |
|   | 14 | 20.000  | yes | .    | .    | 13 | 8 |
|   | 15 | 20.000  | yes | .    | .    | 14 | 7 |
|   | 16 | 20.000  | yes | .303 | .101 | 15 | 6 |
|   | 17 | 21.000  | no  | .    | .    | 15 | 5 |
|   | 18 | 29.000  | no  | .    | .    | 15 | 4 |
|   | 19 | 39.000  | no  | .    | .    | 15 | 3 |
|   | 20 | 52.000  | yes | .202 | .106 | 16 | 2 |
|   | 21 | 66.000  | yes | .101 | .089 | 17 | 1 |
|   | 22 | 139.000 | no  | .    | .    | 17 | 0 |
| 1 | 1  | 11.000  | yes | .750 | .217 | 1  | 3 |
|   | 2  | 14.000  | yes | .500 | .250 | 2  | 2 |
|   | 3  | 17.000  | no  | .    | .    | 2  | 1 |
|   | 4  | 86.000  | no  | .    | .    | 2  | 0 |
| 2 | 1  | 4000    | yes | .800 | .179 | 1  | 4 |
|   | 2  | 14.000  | yes | .600 | .219 | 2  | 3 |
|   | 3  | 14.000  | no  | .    | .    | 2  | 2 |
|   | 4  | 16.000  | yes | .300 | .239 | 3  | 1 |
|   | 5  | 38.000  | yes | .000 | .000 | 4  | 0 |

#### Means and Medians for Survival Time .535

| Dindo-C | Estimate | Std.<br>Error | Mean<br>95% Confidence Interval |                | Estimate | Std.<br>Error | Median<br>95% Confidence Interval |                |
|---------|----------|---------------|---------------------------------|----------------|----------|---------------|-----------------------------------|----------------|
|         |          |               | Lower<br>Bound                  | Upper<br>Bound |          |               | Lower<br>Bound                    | Upper<br>Bound |
| 0       | 36.354   | 9768          | 17.209                          | 55.498         | 18.000   | 1106          | 15.832                            | 20.168         |
| 1       | 49.250   | 18.383        | 13.220                          | 85.280         | 14.000   | .             | .                                 | .              |
| 2       | 19.800   | 7242          | 5606                            | 33.994         | 16.000   | 1592          | 12.880                            | 19.120         |
| Overall | 37.879   | 8951          | 20.334                          | 55.423         | 18.000   | 1036          | 15.970                            | 20.030         |

#### Overall Comparisons

|                       | Chi-Square | df | Sig. |
|-----------------------|------------|----|------|
| Log Rank (Mantel-Cox) | 1251       | 2  | .535 |



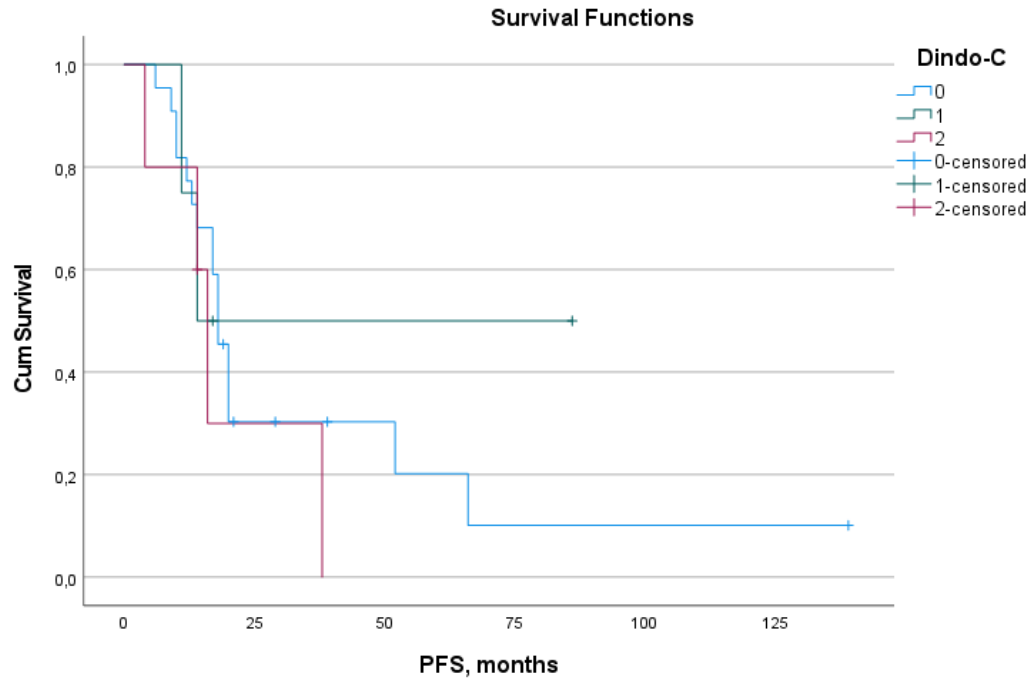

Kaplan-Meier

**Case Processing Summary**

| LN. involved | Total N | N of Events | Censored |          |
|--------------|---------|-------------|----------|----------|
|              |         |             | N        | Per cent |
| No           | 7       | 1           | 6        | 85.7%    |
| Yes          | 24      | 22          | 2        | 8.3%     |
| Overall      | 31      | 23          | 8        | 25.8%    |

**Survival Table**

|              |      |         |          | Cumulative Proportion<br>Surviving at the Time |      | N of<br>Cumulative<br>Events | N of Remaining<br>Cases |
|--------------|------|---------|----------|------------------------------------------------|------|------------------------------|-------------------------|
| LN. involved | Time | Status  | Estimate | Std. Error                                     |      |                              |                         |
| No           | 1    | 11.000  | yes      | .857                                           | .132 | 1                            | 6                       |
|              | 2    | 14.000  | no       | .                                              | .    | 1                            | 5                       |
|              | 3    | 19.000  | no       | .                                              | .    | 1                            | 4                       |
|              | 4    | 21.000  | no       | .                                              | .    | 1                            | 3                       |
|              | 5    | 39.000  | no       | .                                              | .    | 1                            | 2                       |
|              | 6    | 86.000  | no       | .                                              | .    | 1                            | 1                       |
|              | 7    | 139.000 | no       | .                                              | .    | 1                            | 0                       |
| Yes          | 1    | 4000    | yes      | .958                                           | .041 | 1                            | 23                      |
|              | 2    | 6000    | yes      | .917                                           | .056 | 2                            | 22                      |
|              | 3    | 9000    | yes      | .875                                           | .068 | 3                            | 21                      |
|              | 4    | 10.000  | yes      | .                                              | .    | 4                            | 20                      |
|              | 5    | 10.000  | yes      | .792                                           | .083 | 5                            | 19                      |
|              | 6    | 12.000  | yes      | .750                                           | .088 | 6                            | 18                      |

|    |        |     |      |      |    |    |
|----|--------|-----|------|------|----|----|
| 7  | 13.000 | yes | .708 | .093 | 7  | 17 |
| 8  | 14.000 | yes | .    | .    | 8  | 16 |
| 9  | 14.000 | yes | .    | .    | 9  | 15 |
| 10 | 14.000 | yes | .583 | .101 | 10 | 14 |
| 11 | 16.000 | yes | .542 | .102 | 11 | 13 |
| 12 | 17.000 | yes | .    | .    | 12 | 12 |
| 13 | 17.000 | yes | .458 | .102 | 13 | 11 |
| 14 | 17.000 | no  | .    | .    | 13 | 10 |
| 15 | 18.000 | yes | .    | .    | 14 | 9  |
| 16 | 18.000 | yes | .    | .    | 15 | 8  |
| 17 | 18.000 | yes | .321 | .097 | 16 | 7  |
| 18 | 20.000 | yes | .    | .    | 17 | 6  |
| 19 | 20.000 | yes | .    | .    | 18 | 5  |
| 20 | 20.000 | yes | .183 | .082 | 19 | 4  |
| 21 | 29.000 | no  | .    | .    | 19 | 3  |
| 22 | 38.000 | yes | .122 | .074 | 20 | 2  |
| 23 | 52.000 | yes | .061 | .057 | 21 | 1  |
| 24 | 66.000 | yes | .000 | .000 | 22 | 0  |

LN. involved **Means and Medians for Survival Time** .003

N- - не достигнута. N+ - 17 [95%CI:13.96;20.04]

| LN.<br>involved | Estimate | Std.<br>Error | Mean<br>95% Confidence Interval |                | Estimate | Std.<br>Error | Median<br>95% Confidence Interval |                |
|-----------------|----------|---------------|---------------------------------|----------------|----------|---------------|-----------------------------------|----------------|
|                 |          |               | Lower<br>Bound                  | Upper<br>Bound |          |               | Lower<br>Bound                    | Upper<br>Bound |
| No              | 120.714  | 16.929        | 87.533                          | 153.896        | .        | .             | .                                 | .              |
| Yes             | 21.258   | 3475          | 14.447                          | 28.070         | 17.000   | 1550          | 13.962                            | 20.038         |
| Overall         | 37.879   | 8951          | 20.334                          | 55.423         | 18.000   | 1036          | 15.970                            | 20.030         |

**Overall Comparisons**

|                       | Chi-Square | df | Sig. |
|-----------------------|------------|----|------|
| Log Rank (Mantel-Cox) | 9051       | 1  | .003 |

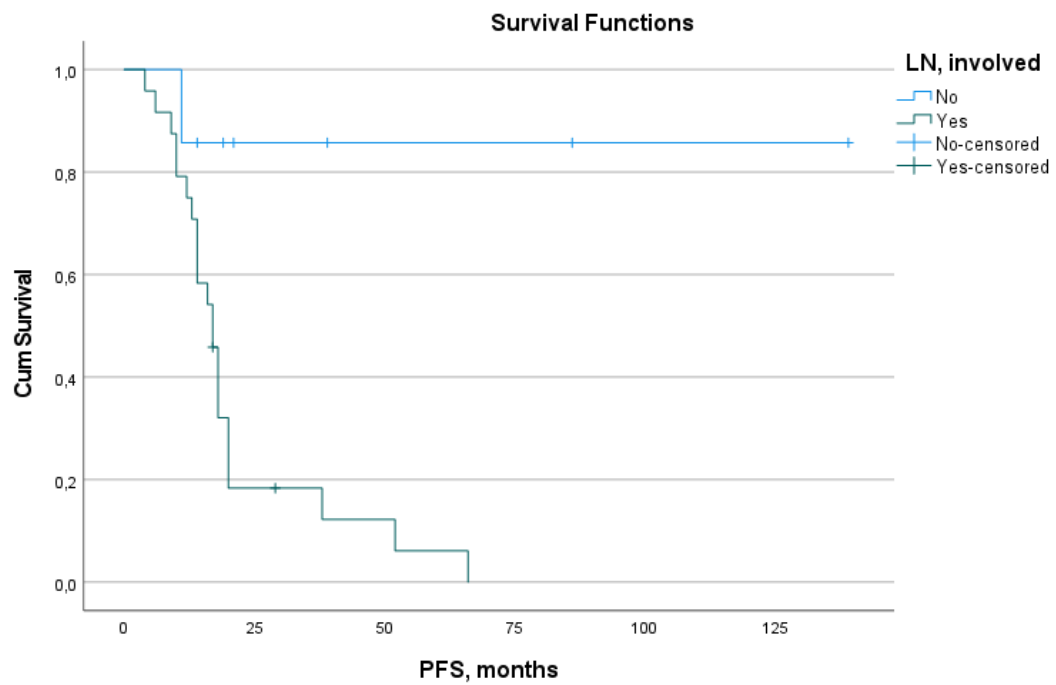

Supplement: s1 [file s1]
