# Supplementary material for: Hemodynamic, Surgical and Oncological Outcomes of 40 Distal Pancreatectomies with Celiac and Left Gastric Arteries Resection (DP CAR) without Arterial Reconstructions and Preoperative Embolization
Source: MDPI journal article supplement (doi:10.3390/cancers14051254), 2022-02-28
Supplement: s1 [file s1]

**Table S5.** Tumor size in mm of the pancreatic ductal adenocarcinoma (PDAC) before chemotherapy, before surgery and after pathological examination

| Patient | Tumor size, pathol, mm | Tumor size before NACHT on CT | Tumor size before surgery on CT |
|---------|------------------------|-------------------------------|---------------------------------|
|         |                        |                               |                                 |
|         |                        |                               |                                 |
| 1       | 52                     | 0                             | 50                              |
| 2       | 43                     | 0                             | 49                              |
| 3       | 32                     | 35                            | 35                              |
| 4       | 64                     | 0                             | 71                              |
| 5       | 43                     | 0                             | 47                              |
| 6       | 21                     | 75                            | 61                              |
| 7       | 52                     | 64                            | 62                              |
| 8       | 42                     | 0                             | 48                              |
| 9       | 37                     | 0                             | 39                              |
| 10      | 48                     | 0                             | 55                              |
| 11      | 62                     | 0                             | 66                              |
| 12      | 65                     | 0                             | 69                              |
| 13      | 64                     | 0                             | 66                              |
| 14      | 42                     | 58                            | 49                              |
| 15      | 73                     | 0                             | 74                              |
| 16      | 67                     | 81                            | 70                              |
| 17      | 36                     | 54                            | 38                              |
| 18      | 38                     | 56                            | 41                              |
| 19      | 55                     | 0                             | 55                              |
| 20      | 61                     | 0                             | 64                              |
| 21      | 44                     | 48                            | 48                              |
| 22      | 59                     | 0                             | 60                              |
| 23      | 48                     | 61                            | 60                              |
| 24      | 52                     | 71                            | 65                              |
| 25      | 57                     | 74                            | 68                              |
| 26      | 43                     | 49                            | 47                              |
| 27      | 38                     | 44                            | 40                              |
| 28      | 41                     | 64                            | 51                              |
| 29      | 43                     | 53                            | 47                              |
| 30      | 48                     | 66                            | 53                              |
| 31      | 38                     | 52                            | 42                              |
| 32      | 33                     | 46                            | 46                              |
| 33      | 37                     | 51                            | 41                              |
| 34      | 48                     | 77                            | 53                              |
