# Supplementary material for: Hemodynamic, Surgical and Oncological Outcomes of 40 Distal Pancreatectomies with Celiac and Left Gastric Arteries Resection (DP CAR) without Arterial Reconstructions and Preoperative Embolization
Source: MDPI journal article supplement (doi:10.3390/cancers14051254), 2022-02-28
Supplement: s1 [file s1]

**File S3.** Statistical analysis of hemodynamic changes in pancreatoduodenal arterial system after DP CAR.

Frequencies

|       |           | Patient # |               | Cumulative<br>Percent |
|-------|-----------|-----------|---------------|-----------------------|
|       | Frequency | Percent   | Valid Percent |                       |
| Valid | 1         | 1         | 2.6           | 2.6                   |
|       | 2         | 1         | 2.6           | 5.3                   |
|       | 3         | 1         | 2.6           | 7.9                   |
|       | 4         | 1         | 2.6           | 10.5                  |
|       | 5         | 1         | 2.6           | 13.2                  |
|       | 7         | 1         | 2.6           | 15.8                  |
|       | 8         | 1         | 2.6           | 18.4                  |
|       | 9         | 1         | 2.6           | 21.1                  |
|       | 10        | 1         | 2.6           | 23.7                  |
|       | 12        | 1         | 2.6           | 26.3                  |
|       | 13        | 1         | 2.6           | 28.9                  |
|       | 14        | 1         | 2.6           | 31.6                  |
|       | 15        | 1         | 2.6           | 34.2                  |
|       | 16        | 1         | 2.6           | 36.8                  |
|       | 17        | 1         | 2.6           | 39.5                  |
|       | 18        | 1         | 2.6           | 42.1                  |
|       | 19        | 1         | 2.6           | 44.7                  |
|       | 20        | 1         | 2.6           | 47.4                  |
|       | 21        | 1         | 2.6           | 50.0                  |
|       | 22        | 1         | 2.6           | 52.6                  |
|       | 23        | 1         | 2.6           | 55.3                  |
|       | 24        | 1         | 2.6           | 57.9                  |
|       | 25        | 1         | 2.6           | 60.5                  |
|       | 26        | 1         | 2.6           | 63.2                  |
|       | 27        | 1         | 2.6           | 65.8                  |
|       | 28        | 1         | 2.6           | 68.4                  |
|       | 29        | 1         | 2.6           | 71.1                  |
|       | 30        | 1         | 2.6           | 73.7                  |
|       | 31        | 1         | 2.6           | 76.3                  |
|       | 32        | 1         | 2.6           | 78.9                  |
|       | 33        | 1         | 2.6           | 81.6                  |
|       | 34        | 1         | 2.6           | 84.2                  |
|       | 35        | 1         | 2.6           | 86.8                  |
|       | 36        | 1         | 2.6           | 89.5                  |

|       |    |       |       |       |
|-------|----|-------|-------|-------|
| 37    | 1  | 2.6   | 2.6   | 92.1  |
| 38    | 1  | 2.6   | 2.6   | 94.7  |
| 39    | 1  | 2.6   | 2.6   | 97.4  |
| 40    | 1  | 2.6   | 2.6   | 100.0 |
| Total | 38 | 100.0 | 100.0 |       |

Frequencies

|       |           | Type      |         |               | Cumulative<br>Percent |
|-------|-----------|-----------|---------|---------------|-----------------------|
|       |           | Frequency | Percent | Valid Percent |                       |
| Valid | classical | 30        | 78.9    | 78.9          | 78.9                  |
|       | aberrant  | 8         | 21.1    | 21.1          | 100.0                 |
|       | Total     | 38        | 100.0   | 100.0         |                       |

|       |       | Puls preservation |         |               | Cumulative<br>Percent |
|-------|-------|-------------------|---------|---------------|-----------------------|
|       |       | Frequency         | Percent | Valid Percent |                       |
| Valid | no    | 4                 | 10.5    | 10.5          | 10.5                  |
|       | yes   | 34                | 89.5    | 89.5          | 100.0                 |
|       | Total | 38                | 100.0   | 100.0         |                       |

|       |            | Type od parenchimal blood flow |         |               | Cumulative<br>Percent |
|-------|------------|--------------------------------|---------|---------------|-----------------------|
|       |            | Frequency                      | Percent | Valid Percent |                       |
| Valid | collateral | 12                             | 31.6    | 31.6          | 31.6                  |
|       | main       | 26                             | 68.4    | 68.4          | 100.0                 |
|       | Total      | 38                             | 100.0   | 100.0         |                       |

Frequencies

| Statistics |       |        |        |        |        |         |         |        |        |                  |        |        |        |                  |        |         |         |         |         |
|------------|-------|--------|--------|--------|--------|---------|---------|--------|--------|------------------|--------|--------|--------|------------------|--------|---------|---------|---------|---------|
|            |       | Linea  |        |        |        | Preop   |         |        |        | GDA PDA PHA RGEA |        |        |        | GDA PDA PHA RGEA |        |         |         |         |         |
|            |       | diamed | diamed | diamed | diamed | CHA/    | CHA/    | flow   | flow   | flow             | flow   | diamed | diamed | diamed           | diamed | diamed  | diamed  | diamed  | diamed  |
|            |       | ter    | ter    | ter    | ter    | GDA     | PDA     | intenc | intenc | intenc           | intenc | ters   | ters   | ters             | ters   | ters    | ters    | ters    | ters    |
|            |       | before | before | before | before | diamete | diamete | ity    | ity    | ity              | ity    | ratio  | ratio  | ratio            | ratio  | differe | differe | differe | differe |
|            |       | surge  | surge  | surge  | surge  | ters    | ters    | altera | altera | altera           | altera | after/ | after/ | after/           | after/ | after/  | after/  | after/  | after/  |
|            |       | ry.    | ry.    | ry.    | ry.    | ratio   | ratio   | ion    | ion    | ion              | ion    | before | before | before           | before | before  | before  | before  | before  |
|            |       | mm     | mm     | mm     | mm     |         |         | before | before | before           | before |        |        |                  |        |         |         |         |         |
| N          | Valid | 38     | 38     | 38     | 38     | 38      | 38      | 38     | 38     | 38               | 35     | 38     | 38     | 38               | 35     | 38      | 38      | 38      | 35      |

|                   |        |             |        |        |        |        |        |              |               |        |             |        |        |        |        |          |        |        |        |   |
|-------------------|--------|-------------|--------|--------|--------|--------|--------|--------------|---------------|--------|-------------|--------|--------|--------|--------|----------|--------|--------|--------|---|
| Mis<br>sing       | 0      | 0           | 0      | 0      | 0      | 0      | 0      | 0            | 0             | 0      | 0           | 3      | 0      | 0      | 0      | 3        | 0      | 0      | 0      | 3 |
| Mean              | -21.26 | 3.72        | 552.50 | 953.86 | 212.52 | 661.41 | 342.10 | 992.37       | 317.32        | 521.18 | 493.55      | 141.10 | 861.46 | 551.00 | 021.26 | 89 .2324 | .9795  | -.0142 | .5520  |   |
| Std.<br>Deviation | 19.339 | 1.2504<br>9 | .8294  | 5.9816 | 4.7775 | 8.5300 | 4.8212 | 14.0754<br>4 | 14.5227<br>74 | .7737  | 4.0057<br>5 | .3040  | 0.3834 | 8.1325 | 0.2929 | 2.9307   | 3.5617 | 6.4960 | 1.5424 |   |
| Minimum           | -66    | 1.82        | 1.10   | 2.00   | 1.20   | .80    | .83    | .16          | .91           | .27    | .40         | .63    | .98    | .66    | .80    | -2.30    | -.07   | -1.61  | -.74   |   |
| Maximum           | 0      | 6.67        | 5.76   | 6.30   | 3.91   | 3.08   | 4.45   | 25.01        | 90.20         | 5.13   | 18.84       | 2.24   | 3.08   | 1.38   | 2.08   | 2.25     | 2.29   | 1.30   | 1.82   |   |
| Perc<br>entiles   | 25     | -32.50      | 2.7000 | 1.9475 | 2.9000 | 1.9250 | 1.0691 | 1.3768       | .7839         | 2.1703 | .8394       | 1.2439 | .9409  | 1.2137 | .9359  | 1.0561   | -.2625 | .5800  | -.2500 |   |
| 50                | -16.00 | 3.6500      | 2.3050 | 4.2000 | 2.5500 | 1.2609 | 1.9696 | 1.4808       | 4.1565        | 1.1105 | 2.3497      | 1.1023 | 1.4278 | .9741  | 1.2381 | .3450    | .9500  | -.1100 | .5000  |   |
| 75                | -7.00  | 4.4225      | 2.9100 | 4.4625 | 3.1925 | 1.7870 | 2.6785 | 2.4414       | 6.6945        | 1.3036 | 3.5022      | 1.2500 | 1.6083 | 1.0447 | 1.3680 | .8125    | 1.4425 | .1500  | .9100  |   |

Histogram

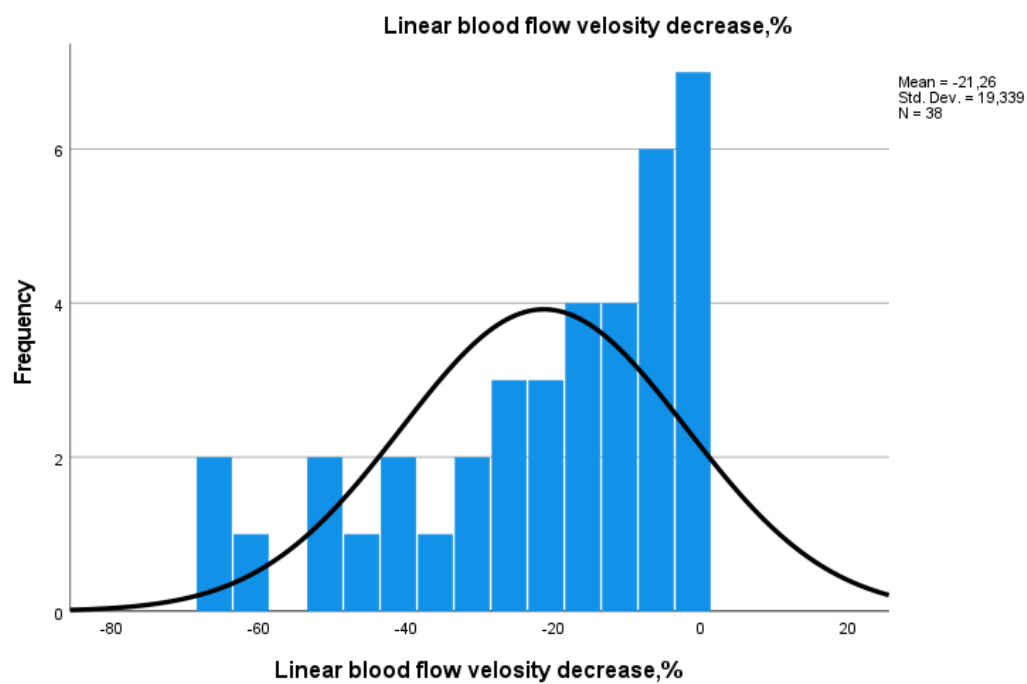

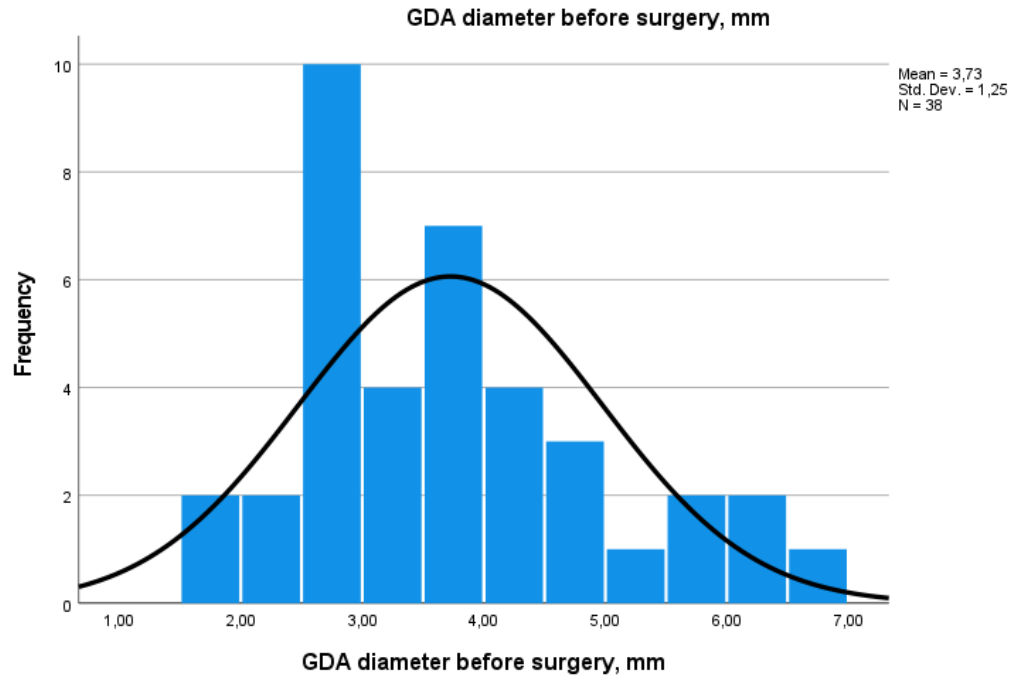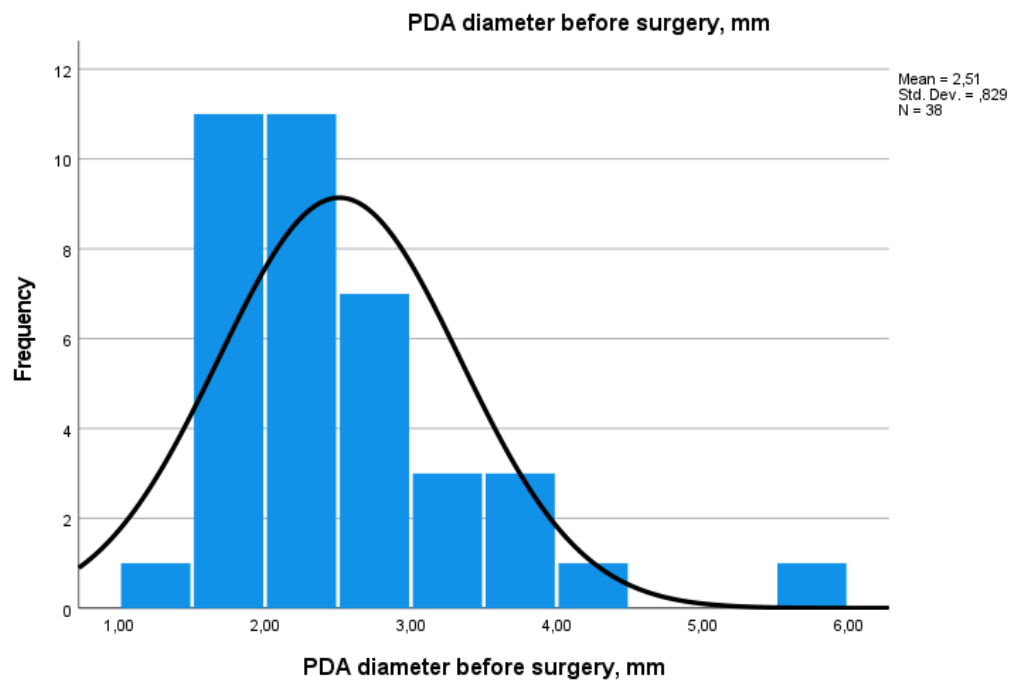

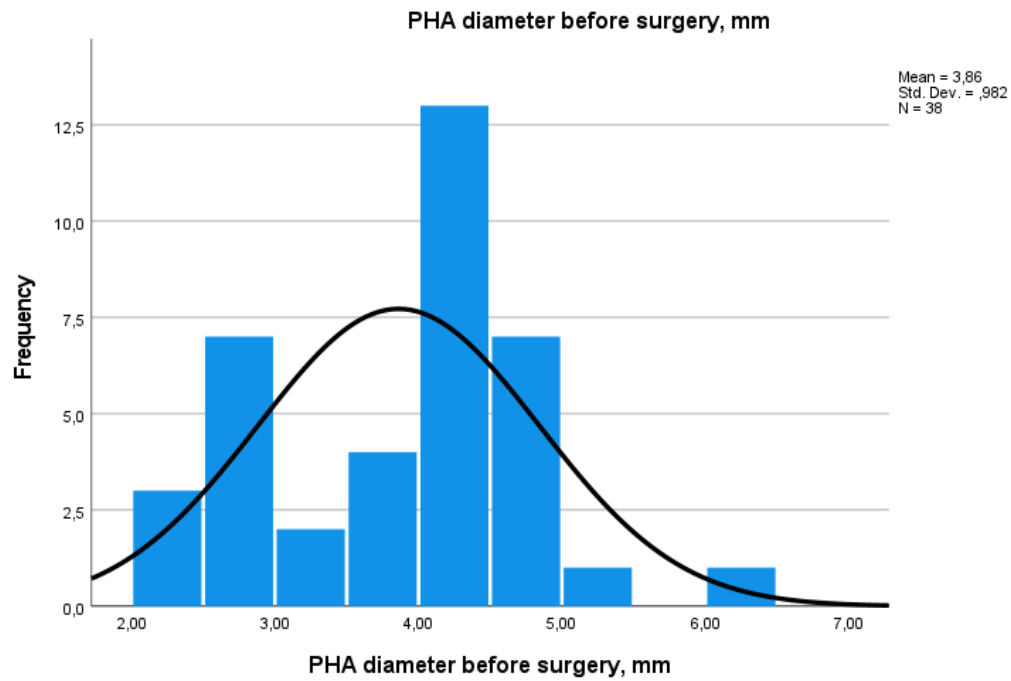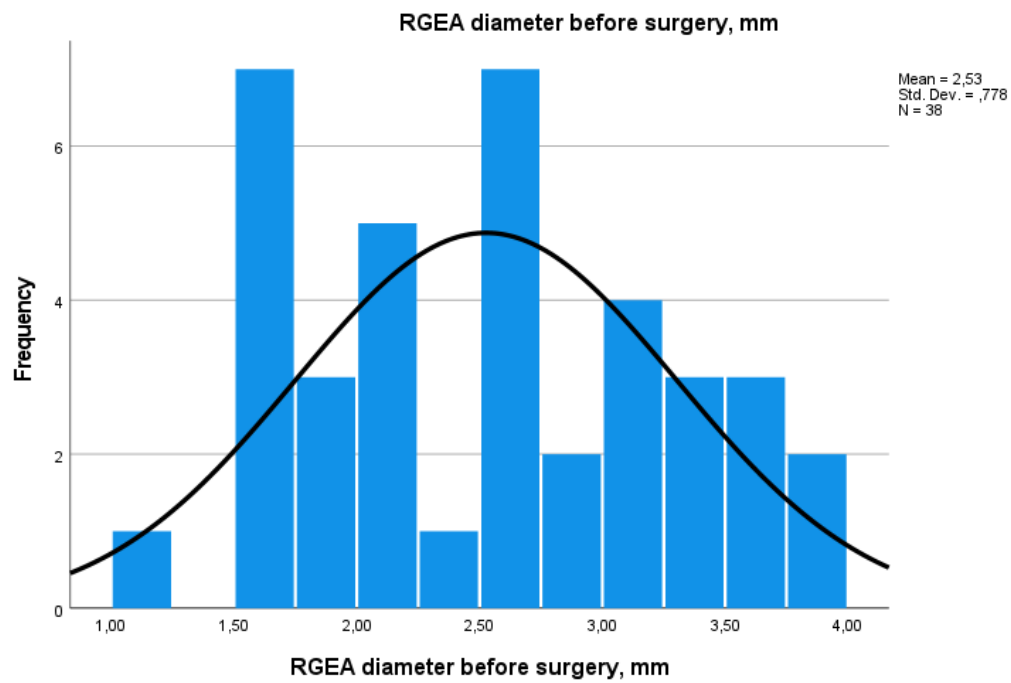

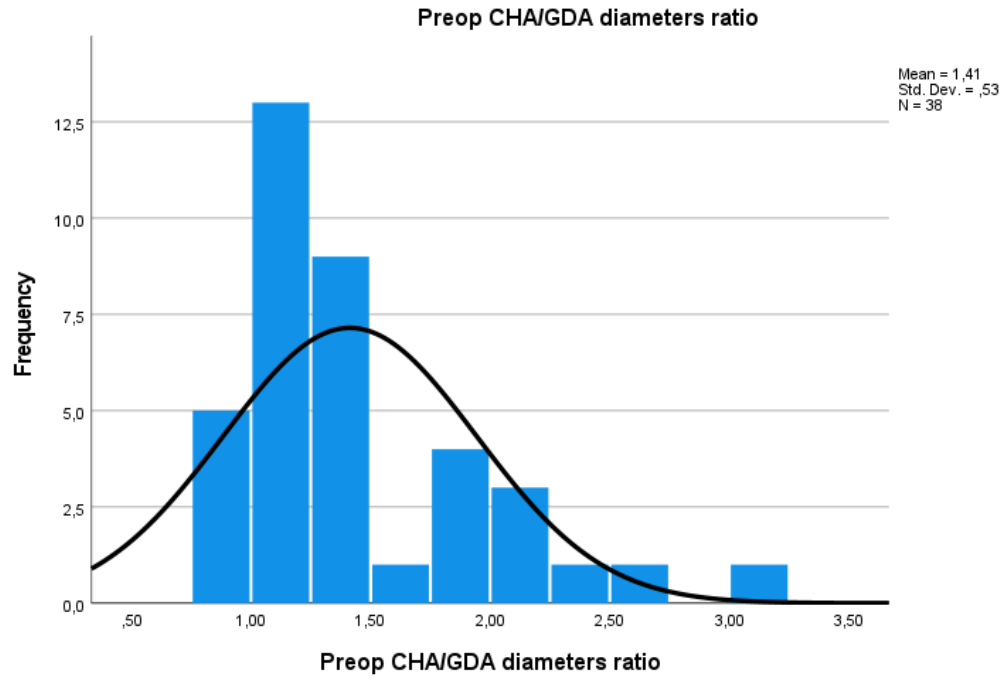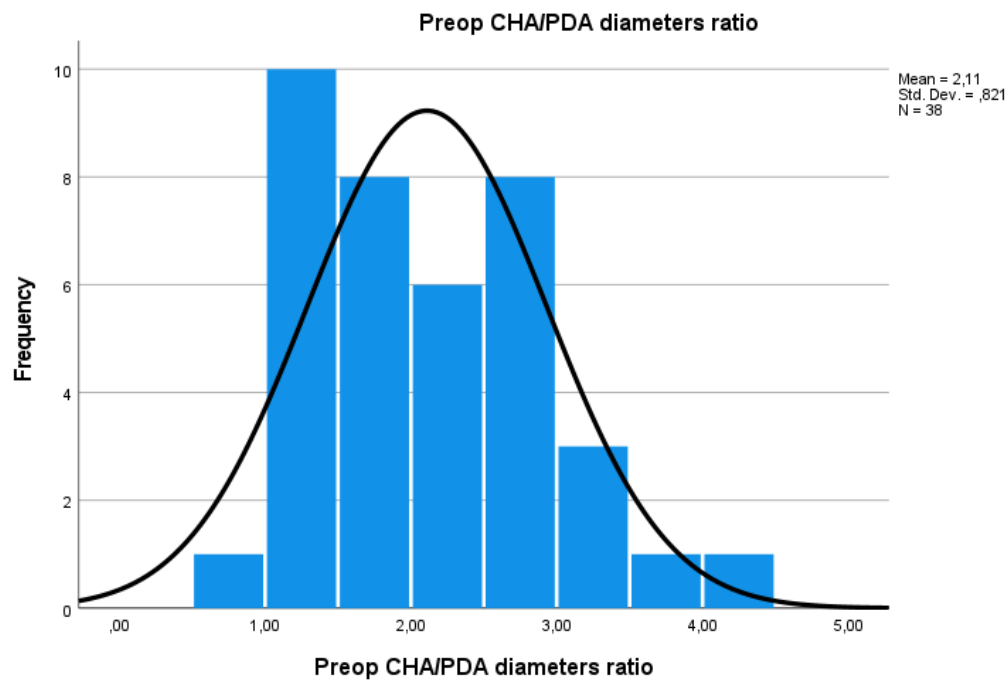

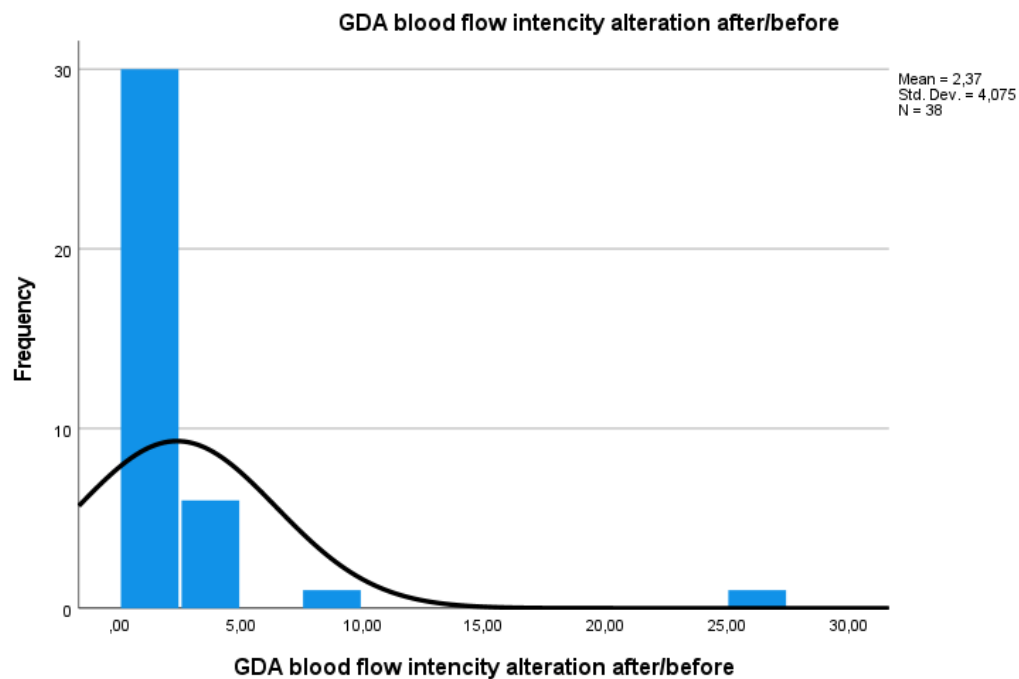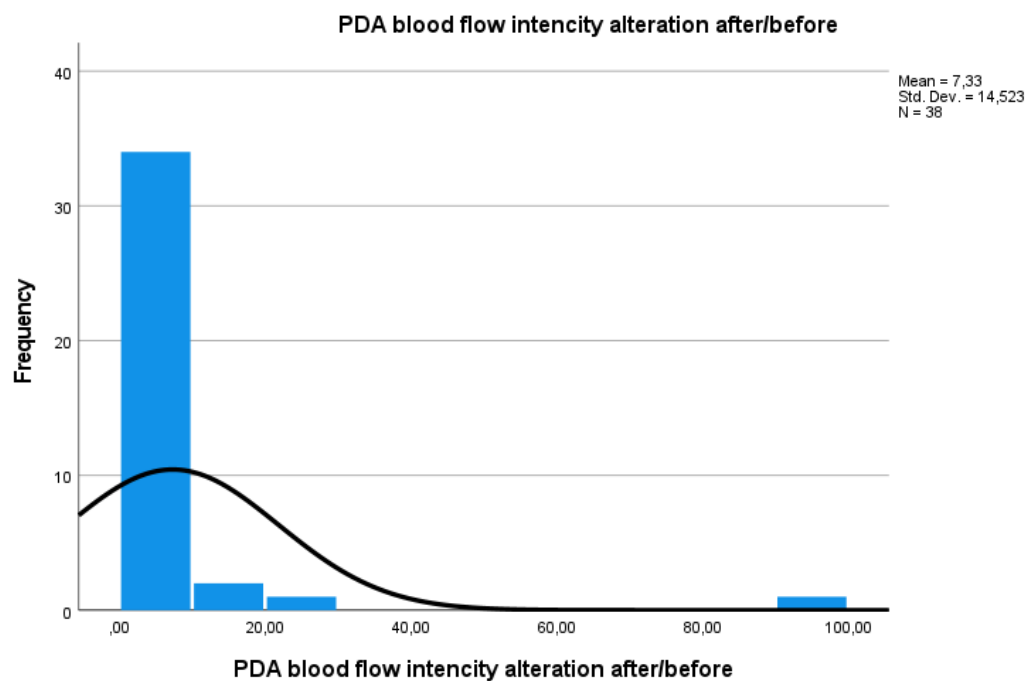

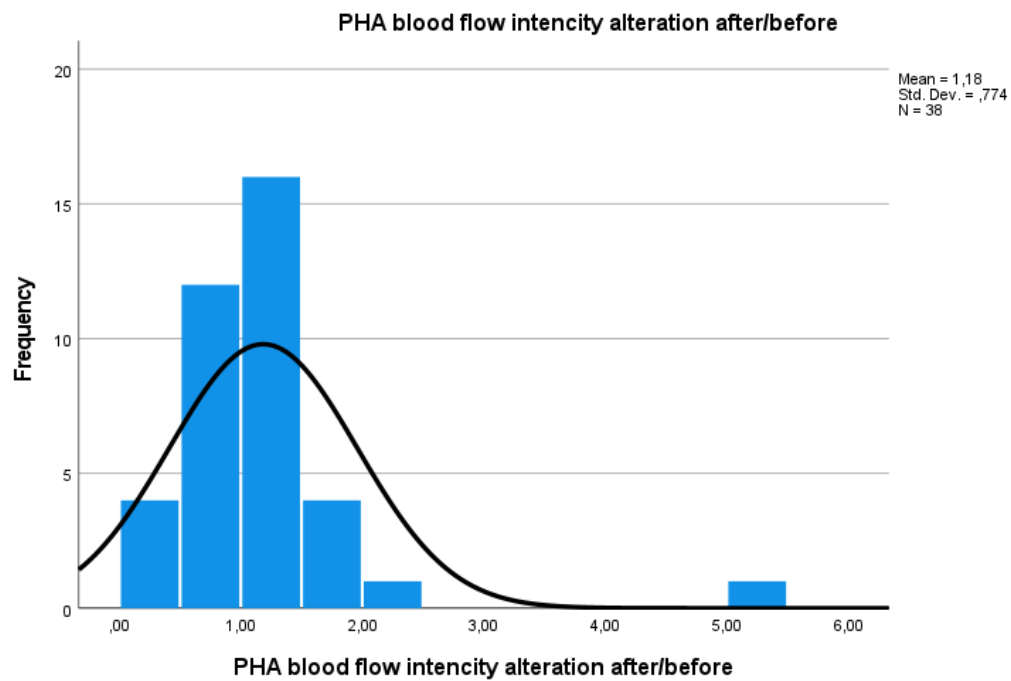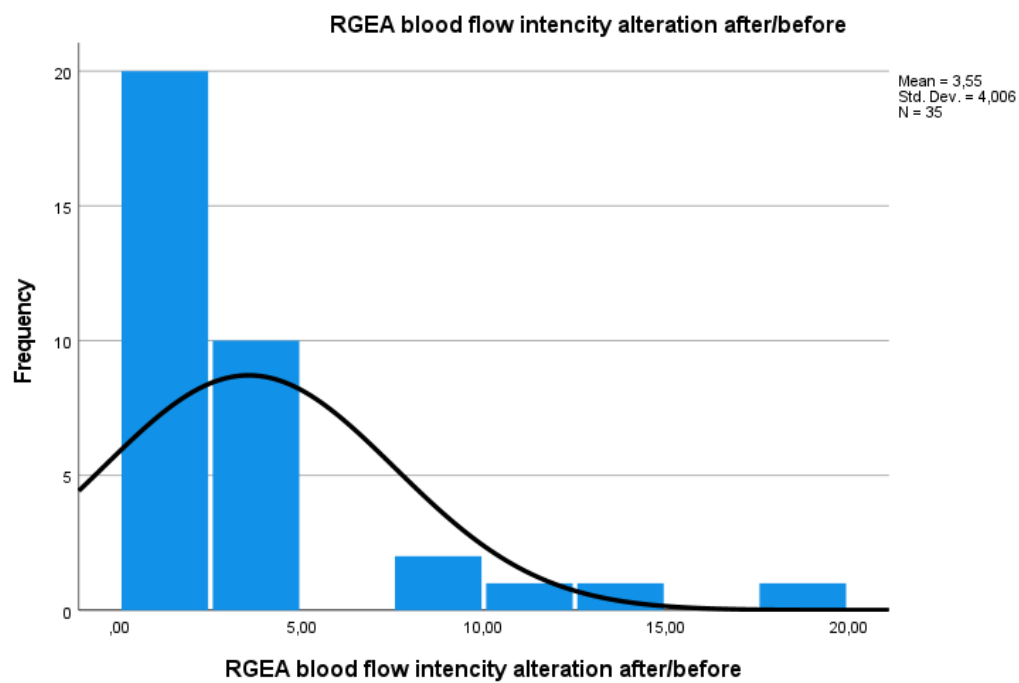



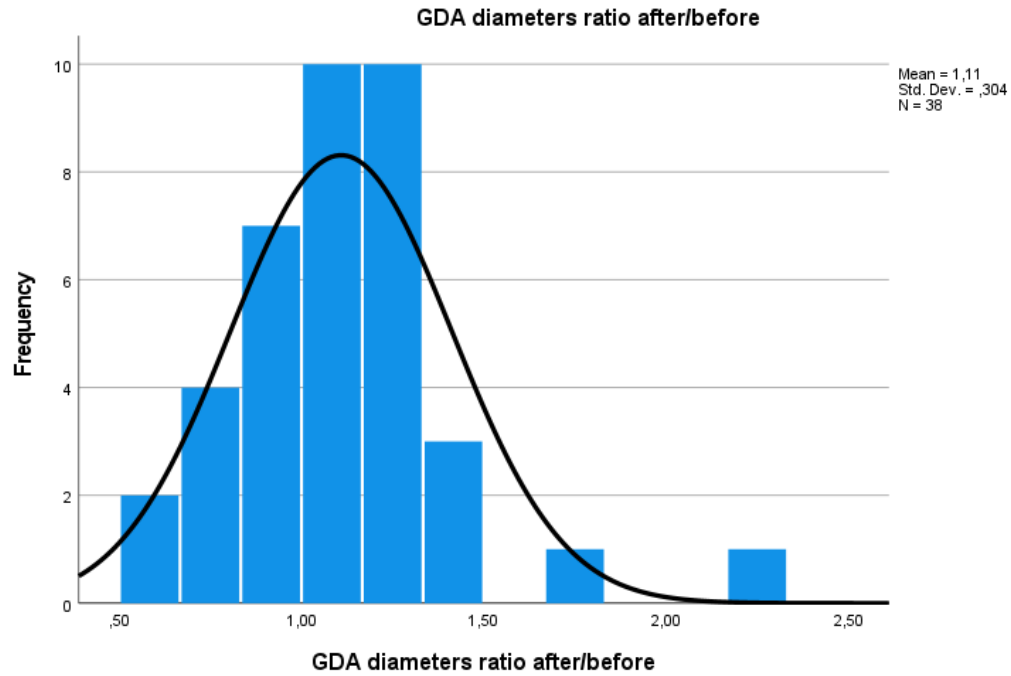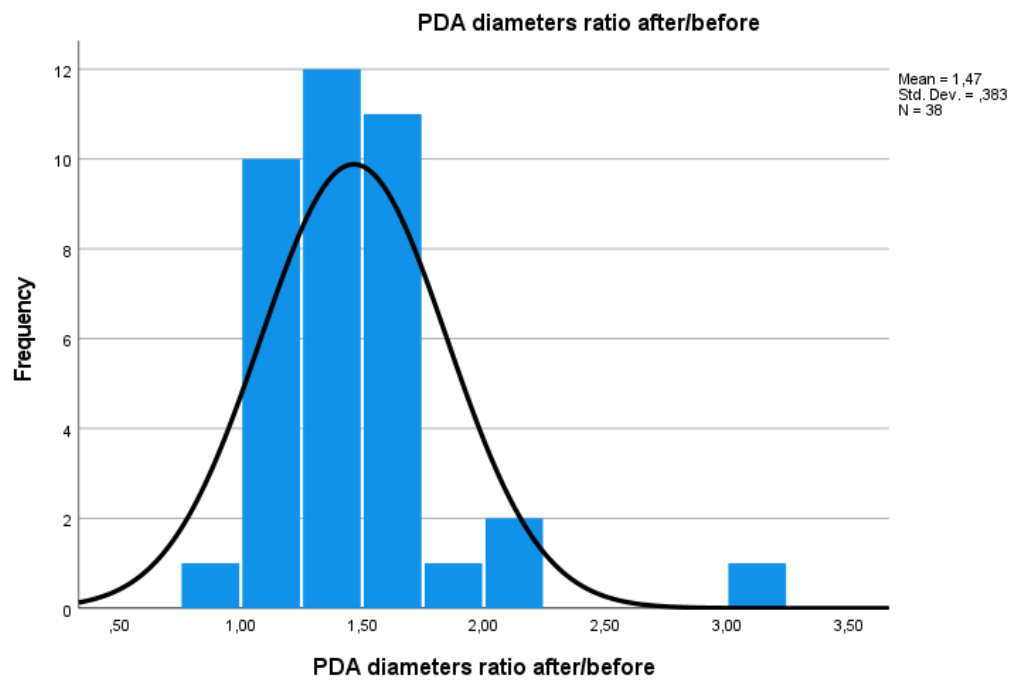

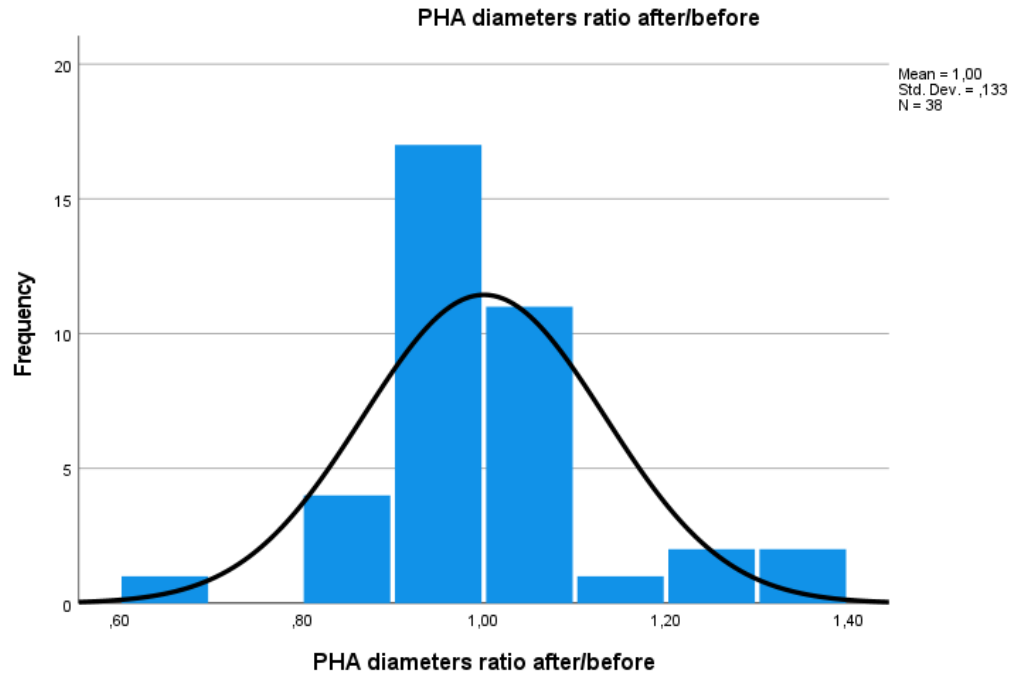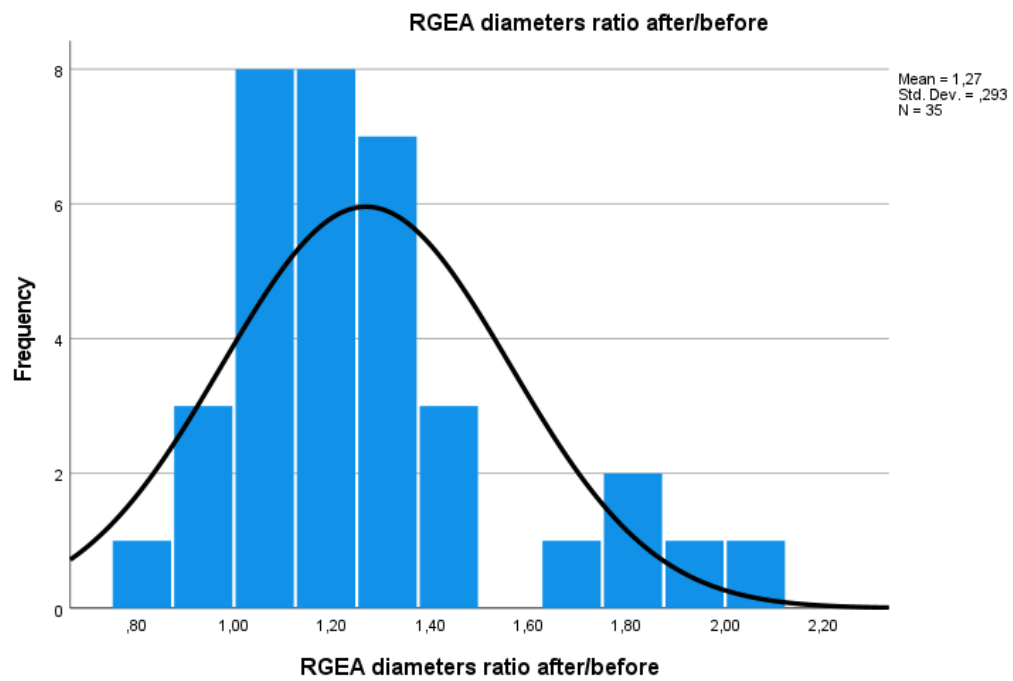

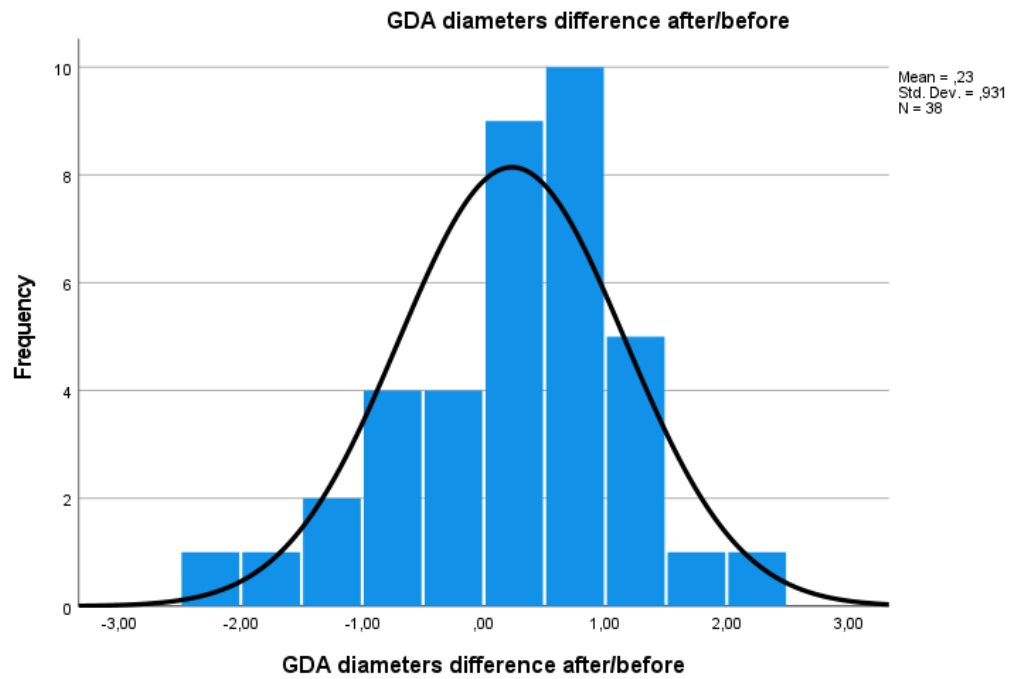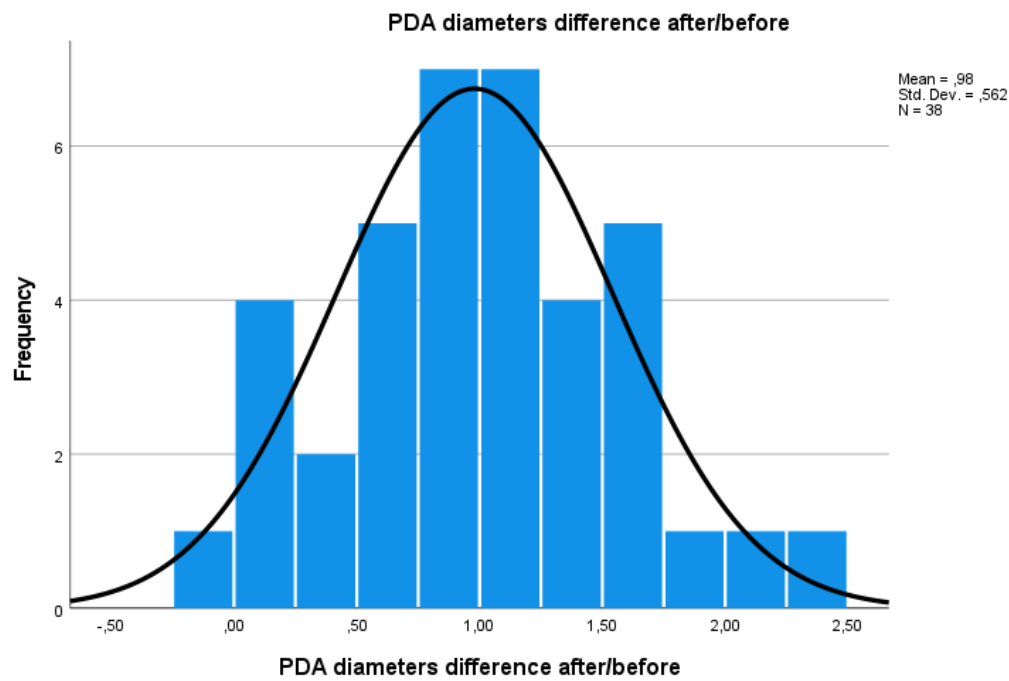

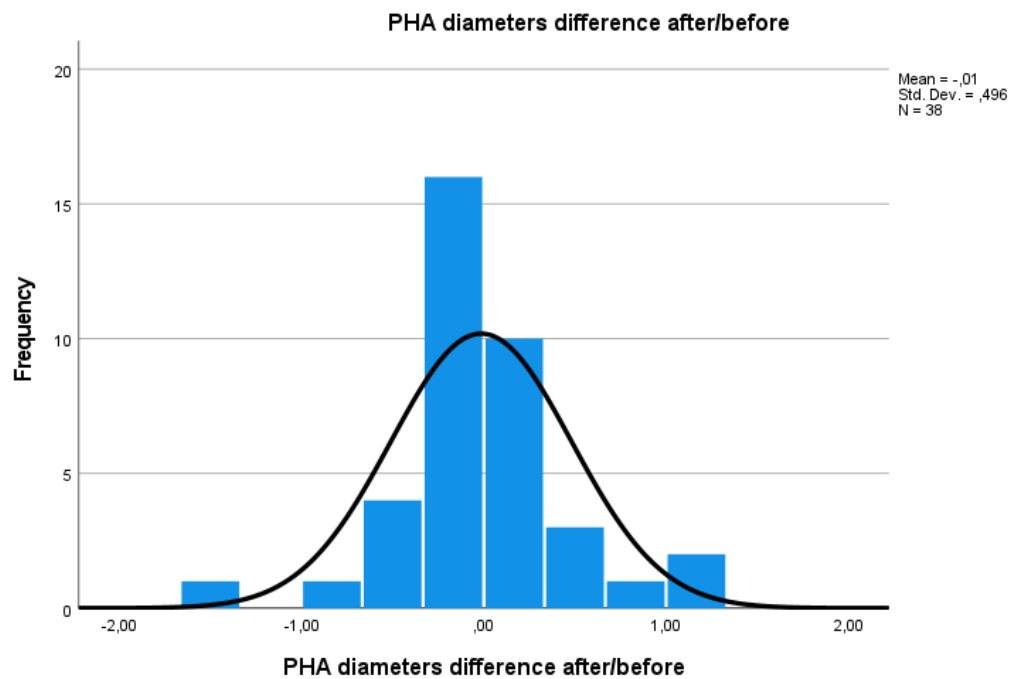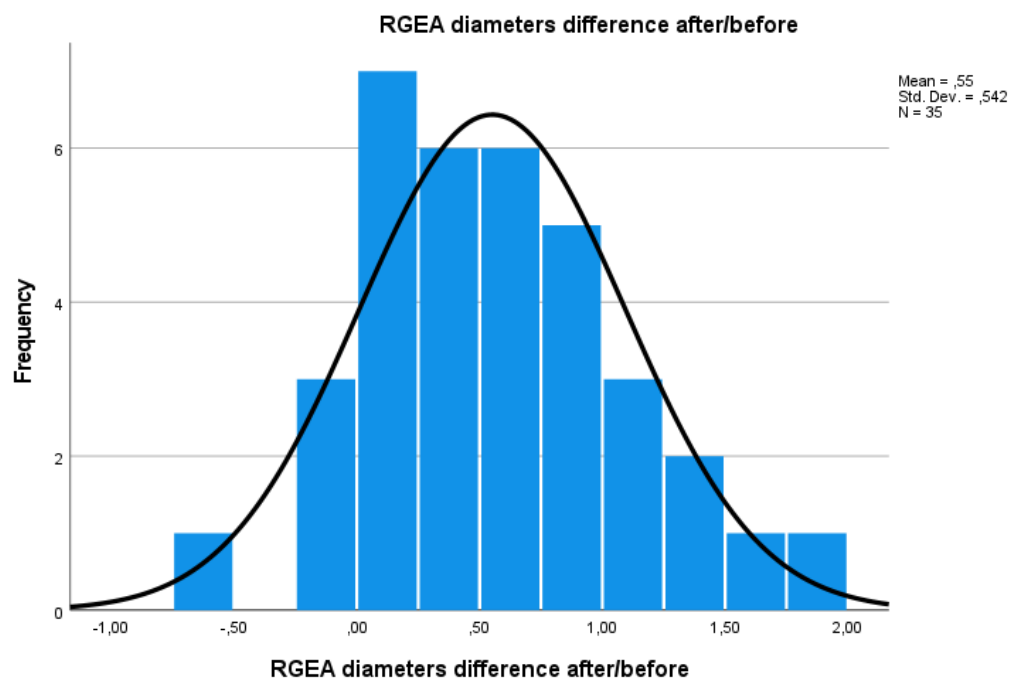

T-Test

| Group Statistics              |                   |    |        |                |                 |
|-------------------------------|-------------------|----|--------|----------------|-----------------|
|                               | Puls preservation | N  | Mean   | Std. Deviation | Std. Error Mean |
| Preop CHA/GDA diameters ratio | no                | 4  | 1.2520 | .50953         | .25476          |
|                               | yes               | 34 | 1.4324 | .53653         | .09201          |
| Preop CHA/PDA diameters ratio | no                | 4  | 2.0719 | .96106         | .48053          |
|                               | yes               | 34 | 2.1144 | .81974         | .14058          |

| Independent Samples Test      |                             |                                         |      |                              |       |                 |                 |                       |                                           |         |
|-------------------------------|-----------------------------|-----------------------------------------|------|------------------------------|-------|-----------------|-----------------|-----------------------|-------------------------------------------|---------|
|                               |                             | Levene's Test for Equality of Variances |      | t-test for Equality of Means |       |                 |                 |                       |                                           |         |
|                               |                             | F                                       | Sig. | t                            | df    | Sig. (2-tailed) | Mean Difference | Std. Error Difference | 95% Confidence Interval of the Difference |         |
|                               |                             |                                         |      |                              |       |                 |                 |                       | Lower                                     | Upper   |
| Preop CHA/GDA diameters ratio | Equal variances assumed     | .056                                    | .814 | -.639                        | 36    | .527            | -.18036         | .28244                | -.75318                                   | .39246  |
|                               | Equal variances not assumed |                                         |      | -.666                        | 3.828 | .543            | -.18036         | .27087                | -.94595                                   | .58523  |
| Preop CHA/PDA diameters ratio | Equal variances assumed     | .403                                    | .529 | -.097                        | 36    | .924            | -.04253         | .44002                | -.93493                                   | .84987  |
|                               | Equal variances not assumed |                                         |      | -.085                        | 3.533 | .937            | -.04253         | .50067                | -1.50814                                  | 1.42308 |

NPar Tests

Mann-Whitney Test

| Ranks                         |                   |    |           |              |
|-------------------------------|-------------------|----|-----------|--------------|
|                               | Puls preservation | N  | Mean Rank | Sum of Ranks |
| Preop CHA/GDA diameters ratio | no                | 4  | 15.00     | 60.00        |
|                               | yes               | 34 | 20.03     | 681.00       |
|                               | Total             | 38 |           |              |
| Preop CHA/PDA diameters ratio | no                | 4  | 18.75     | 75.00        |
|                               | yes               | 34 | 19.59     | 666.00       |
|                               | Total             | 38 |           |              |

|                                | Test Statistics  |                  |
|--------------------------------|------------------|------------------|
|                                | Preop<br>CHA/GDA | Preop<br>CHA/PDA |
|                                | diameters ratio  | diameters ratio  |
| Mann-Whitney U                 | 50.000           | 65.000           |
| Wilcoxon W                     | 60.000           | 75.000           |
| Z                              | -.856            | -.143            |
| Asymp. Sig. (2-tailed)         | .392             | .887             |
| Exact Sig. [2*(1-tailed Sig.)] | .420             | .909             |

Graph

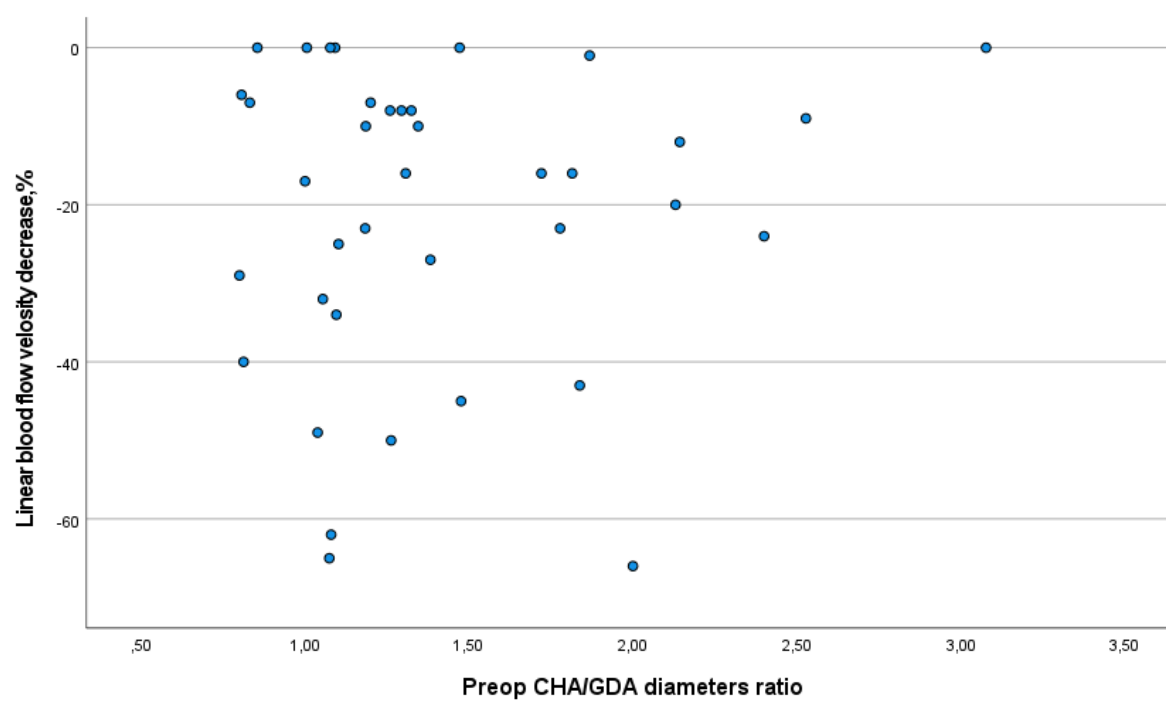

Graph

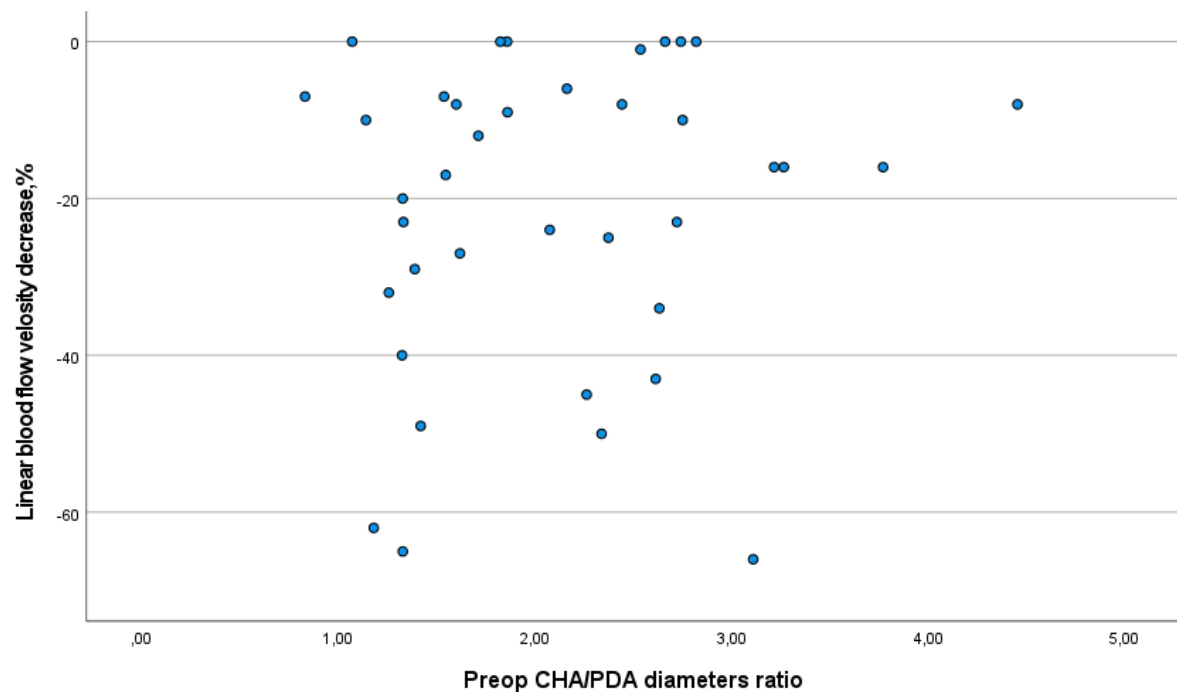

#### Correlations

| Correlations                     |                     |                                     |                                     |
|----------------------------------|---------------------|-------------------------------------|-------------------------------------|
|                                  |                     | Preop<br>CHA/GDA<br>diameters ratio | Preop<br>CHA/PDA<br>diameters ratio |
| Preop CHA/GDA diameters<br>ratio | Pearson Correlation | 1                                   | .142                                |
|                                  | Sig. (2-tailed)     |                                     | .395                                |
|                                  | N                   | 38                                  | 38                                  |
| Preop CHA/PDA diameters<br>ratio | Pearson Correlation | .142                                | 1                                   |
|                                  | Sig. (2-tailed)     | .395                                |                                     |
|                                  | N                   | 38                                  | 38                                  |

#### Nonparametric Correlations

| Correlations   |                                  |                                     |                                     |
|----------------|----------------------------------|-------------------------------------|-------------------------------------|
|                |                                  | Preop<br>CHA/GDA<br>diameters ratio | Preop<br>CHA/PDA<br>diameters ratio |
| Spearman's rho | Preop CHA/GDA diameters<br>ratio | Correlation Coefficient             | 1.000                               |
|                |                                  | Sig. (2-tailed)                     | .                                   |
|                |                                  | N                                   | 38                                  |
|                | Preop CHA/PDA diameters<br>ratio | Correlation Coefficient             | .283                                |
|                |                                  | Sig. (2-tailed)                     | .085                                |
|                |                                  | N                                   | 38                                  |

Graph

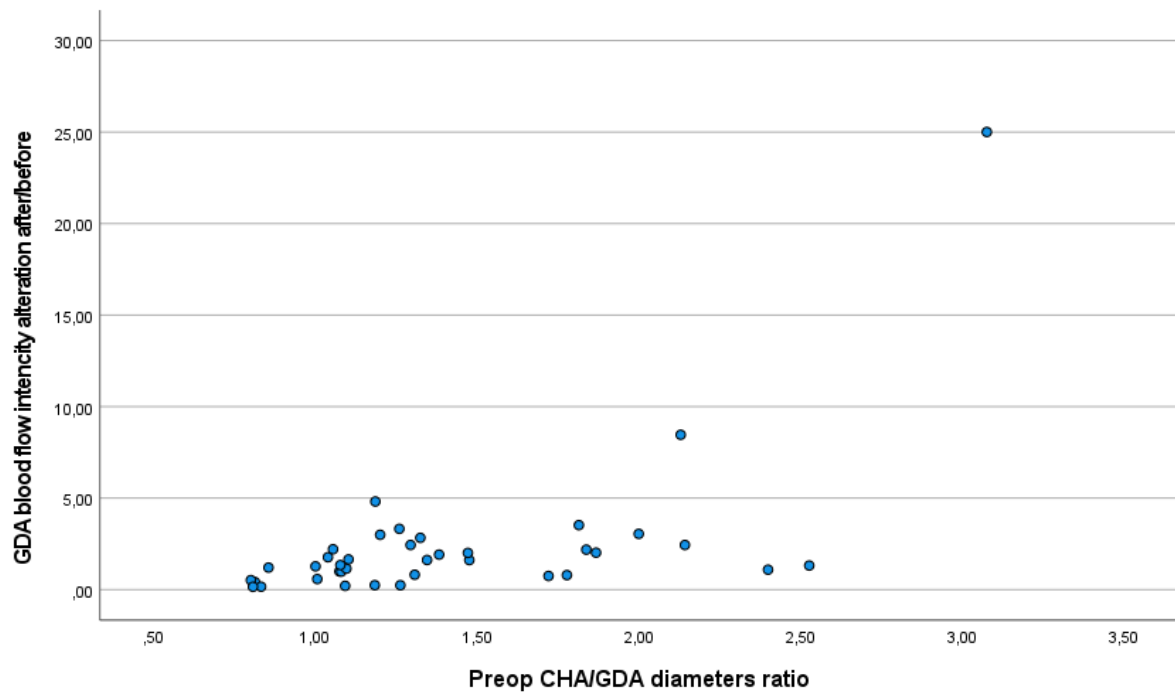

Graph

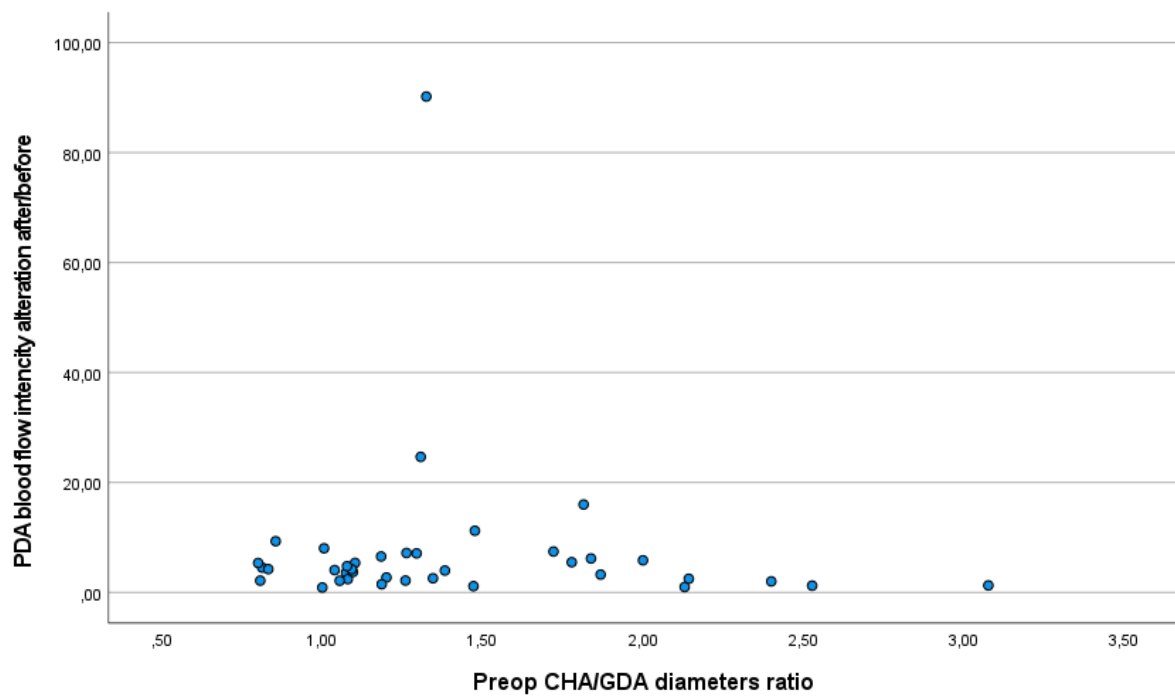

Graph



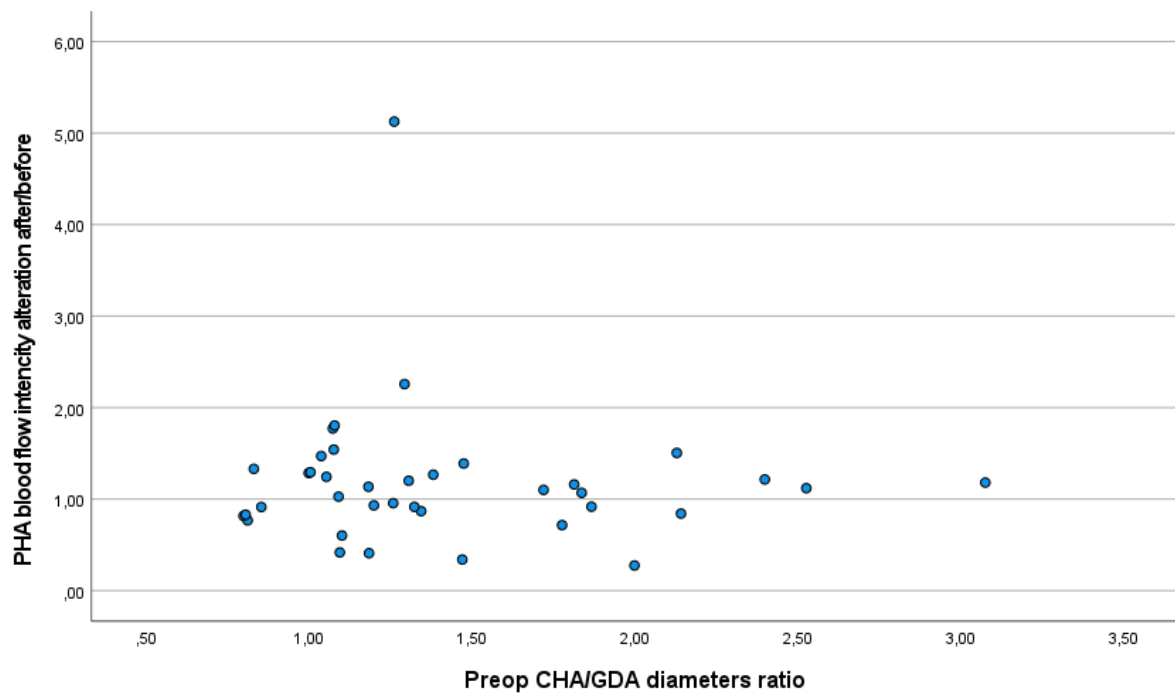

Graph

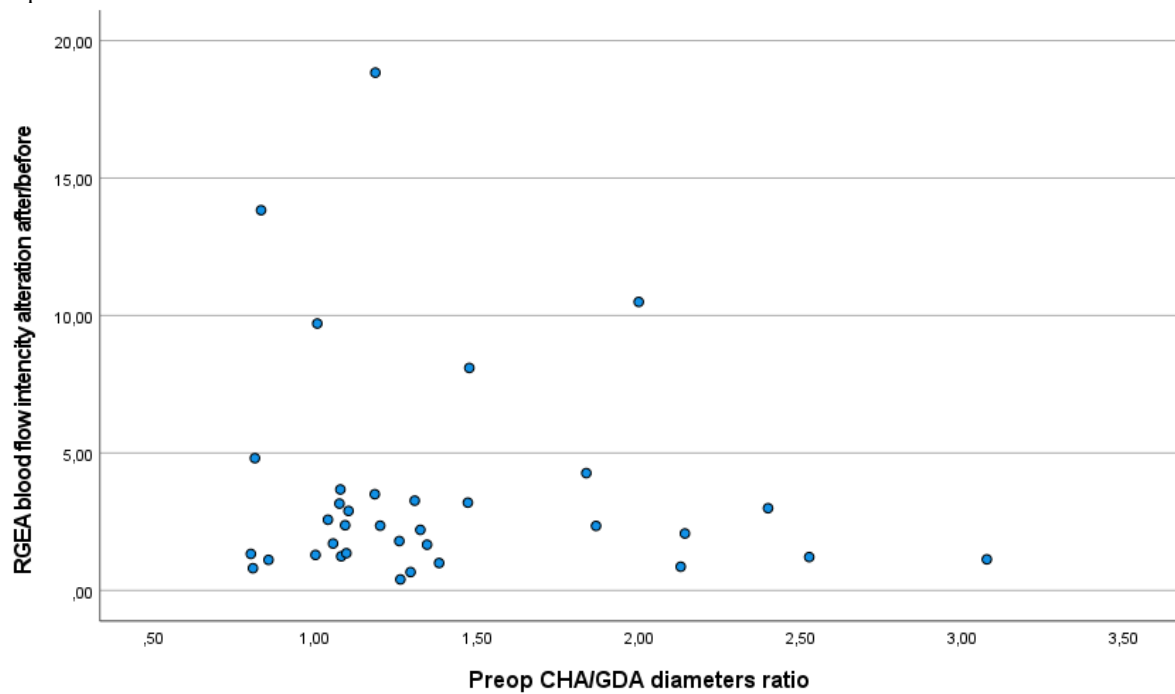

Correlations

Correlations

| Preop<br>CHA/GDA<br>diameters<br>ratio | GDA blood<br>flow<br>intensity<br>alteration<br>after/before | PDA blood<br>flow<br>intensity<br>alteration<br>after/before | PHA blood<br>flow<br>intensity<br>alteration<br>after/before | RGEA<br>blood flow<br>intensity<br>alteration<br>after/before |
|----------------------------------------|--------------------------------------------------------------|--------------------------------------------------------------|--------------------------------------------------------------|---------------------------------------------------------------|
|----------------------------------------|--------------------------------------------------------------|--------------------------------------------------------------|--------------------------------------------------------------|---------------------------------------------------------------|

|                                                         |         |                 |       |       |       |       |       |
|---------------------------------------------------------|---------|-----------------|-------|-------|-------|-------|-------|
| Preop<br>diameters ratio                                | CHA/GDA | Pearson         | 1     | .612  | -.061 | -.061 | -.117 |
|                                                         |         | Correlation     |       |       |       |       |       |
|                                                         |         | Sig. (2-tailed) |       | .000  | .716  | .716  | .504  |
|                                                         |         | N               | 38    | 38    | 38    | 38    | 35    |
| GDA blood flow<br>intensity alteration<br>after/before  |         | Pearson         | .612  | 1     | -.042 | -.057 | -.057 |
|                                                         |         | Correlation     |       |       |       |       |       |
|                                                         |         | Sig. (2-tailed) | .000  |       | .800  | .735  | .744  |
|                                                         |         | N               | 38    | 38    | 38    | 38    | 35    |
| PDA blood flow<br>intensity alteration<br>after/before  |         | Pearson         | -.061 | -.042 | 1     | -.015 | -.033 |
|                                                         |         | Correlation     |       |       |       |       |       |
|                                                         |         | Sig. (2-tailed) | .716  | .800  |       | .926  | .851  |
|                                                         |         | N               | 38    | 38    | 38    | 38    | 35    |
| PHA blood flow<br>intensity alteration<br>after/before  |         | Pearson         | -.061 | -.057 | -.015 | 1     | -.246 |
|                                                         |         | Correlation     |       |       |       |       |       |
|                                                         |         | Sig. (2-tailed) | .716  | .735  | .926  |       | .155  |
|                                                         |         | N               | 38    | 38    | 38    | 38    | 35    |
| RGEA blood flow<br>intensity alteration<br>after/before |         | Pearson         | -.117 | -.057 | -.033 | -.246 | 1     |
|                                                         |         | Correlation     |       |       |       |       |       |
|                                                         |         | Sig. (2-tailed) | .504  | .744  | .851  | .155  |       |
|                                                         |         | N               | 35    | 35    | 35    | 35    | 35    |

#### Nonparametric Correlations

|                   |                                                        |                 |       | Correlations                               |                                                                     |                                                                     |                                                                     |                                                                      |
|-------------------|--------------------------------------------------------|-----------------|-------|--------------------------------------------|---------------------------------------------------------------------|---------------------------------------------------------------------|---------------------------------------------------------------------|----------------------------------------------------------------------|
|                   |                                                        |                 |       | Preop<br>CHA/GD<br>A<br>diameters<br>ratio | GDA<br>blood<br>flow<br>intensity<br>alteration<br>after/befo<br>re | PDA<br>blood<br>flow<br>intensity<br>alteration<br>after/befo<br>re | PHA<br>blood<br>flow<br>intensity<br>alteration<br>after/befo<br>re | RGEA<br>blood<br>flow<br>intensity<br>alteration<br>after/befor<br>e |
| Spearman's<br>rho | Preop<br>diameters ratio                               | Correlation     | 1.000 |                                            | .535                                                                | -.094                                                               | -.068                                                               | -.066                                                                |
|                   |                                                        | Coefficient     |       |                                            |                                                                     |                                                                     |                                                                     |                                                                      |
|                   |                                                        | Sig. (2-tailed) | .     |                                            | .001                                                                | .574                                                                | .686                                                                | .706                                                                 |
|                   |                                                        | N               | 38    |                                            | 38                                                                  | 38                                                                  | 38                                                                  | 35                                                                   |
|                   | GDA blood flow<br>intensity alteration<br>after/before | Correlation     | .535  |                                            | 1.000                                                               | -.246                                                               | -.109                                                               | -.057                                                                |
|                   |                                                        | Coefficient     |       |                                            |                                                                     |                                                                     |                                                                     |                                                                      |
|                   |                                                        | Sig. (2-tailed) | .001  |                                            | .                                                                   | .137                                                                | .515                                                                | .746                                                                 |
|                   |                                                        | N               | 38    |                                            | 38                                                                  | 38                                                                  | 38                                                                  | 35                                                                   |
|                   | PDA blood flow<br>intensity alteration<br>after/before | Correlation     | -.094 |                                            | -.246                                                               | 1.000                                                               | .072                                                                | .268                                                                 |
|                   |                                                        | Coefficient     |       |                                            |                                                                     |                                                                     |                                                                     |                                                                      |
|                   |                                                        | Sig. (2-tailed) | .574  |                                            | .137                                                                | .                                                                   | .669                                                                | .120                                                                 |
|                   |                                                        | N               | 38    |                                            | 38                                                                  | 38                                                                  | 38                                                                  | 35                                                                   |

|                                                         |                 |       |       |      |       |       |
|---------------------------------------------------------|-----------------|-------|-------|------|-------|-------|
| PHA blood flow<br>intensity alteration<br>after/before  | Correlation     | -.068 | -.109 | .072 | 1.000 | -.198 |
|                                                         | Coefficient     |       |       |      |       |       |
|                                                         | Sig. (2-tailed) | .686  | .515  | .669 | .     | .254  |
|                                                         | N               | 38    | 38    | 38   | 38    | 35    |
| RGEA blood flow<br>intensity alteration<br>after/before | Correlation     | -.066 | -.057 | .268 | -.198 | 1.000 |
|                                                         | Coefficient     |       |       |      |       |       |
|                                                         | Sig. (2-tailed) | .706  | .746  | .120 | .254  | .     |
|                                                         | N               | 35    | 35    | 35   | 35    | 35    |

Graph

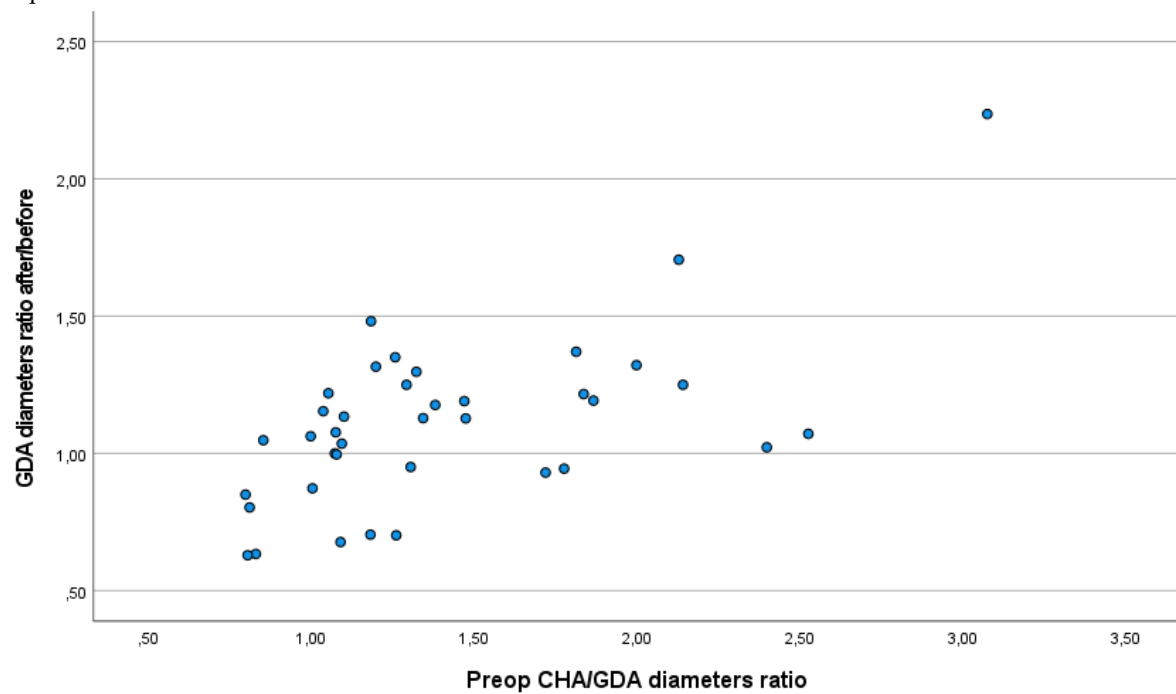

Graph

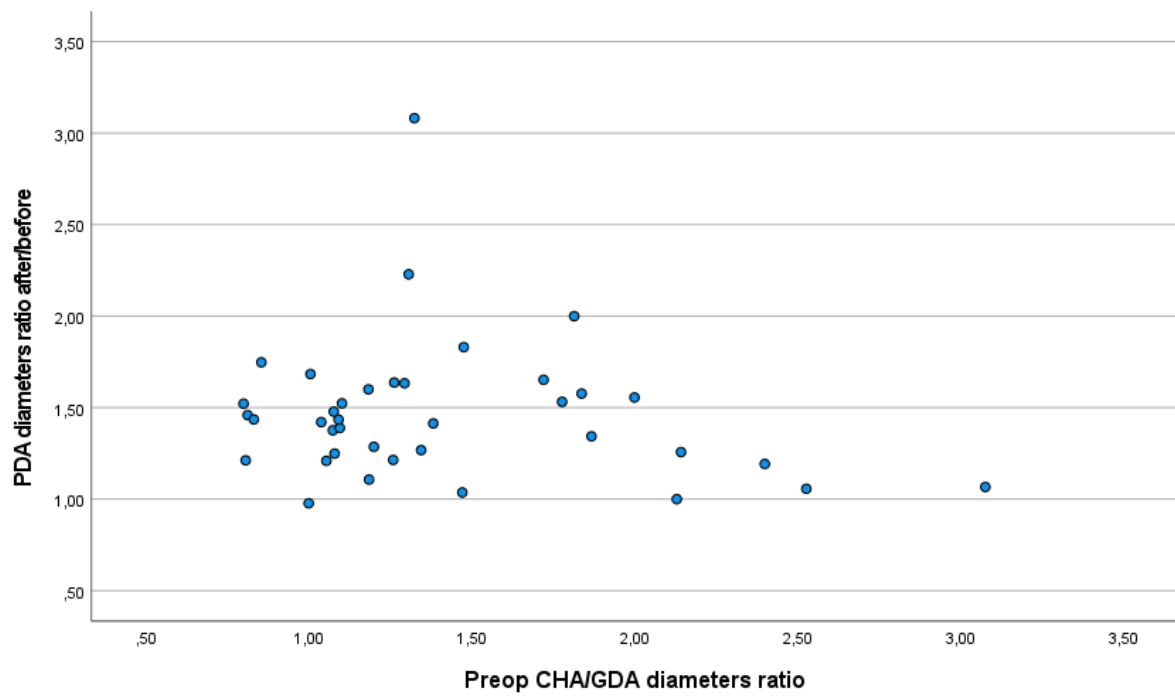

Graph

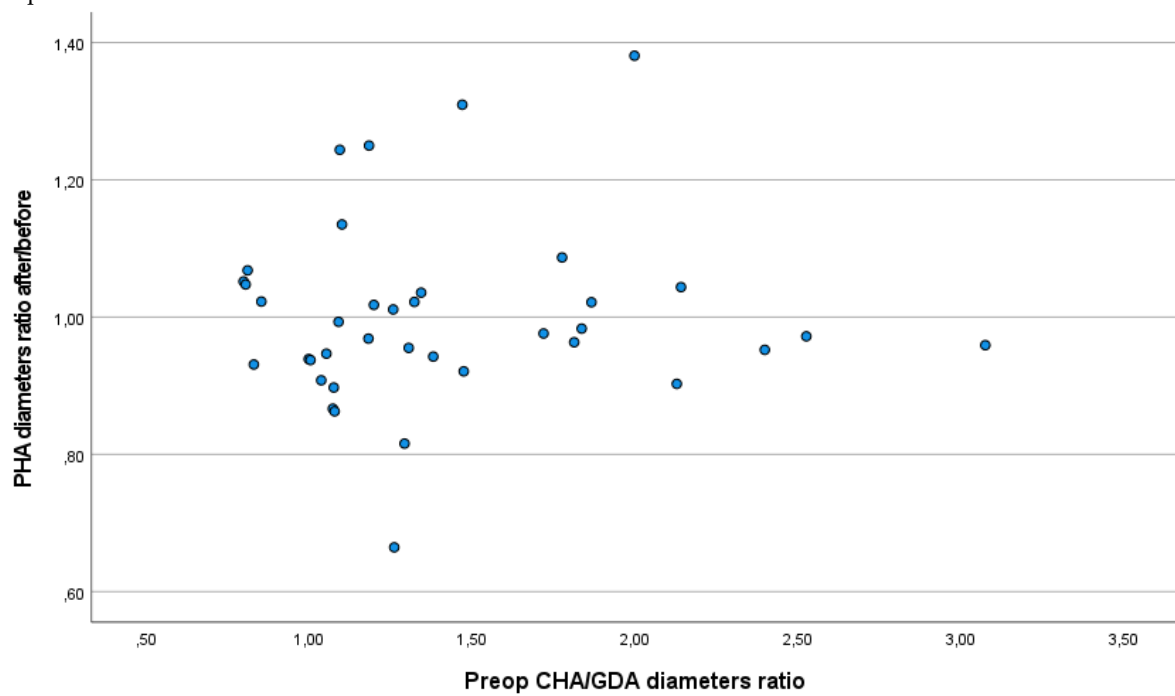

Graph

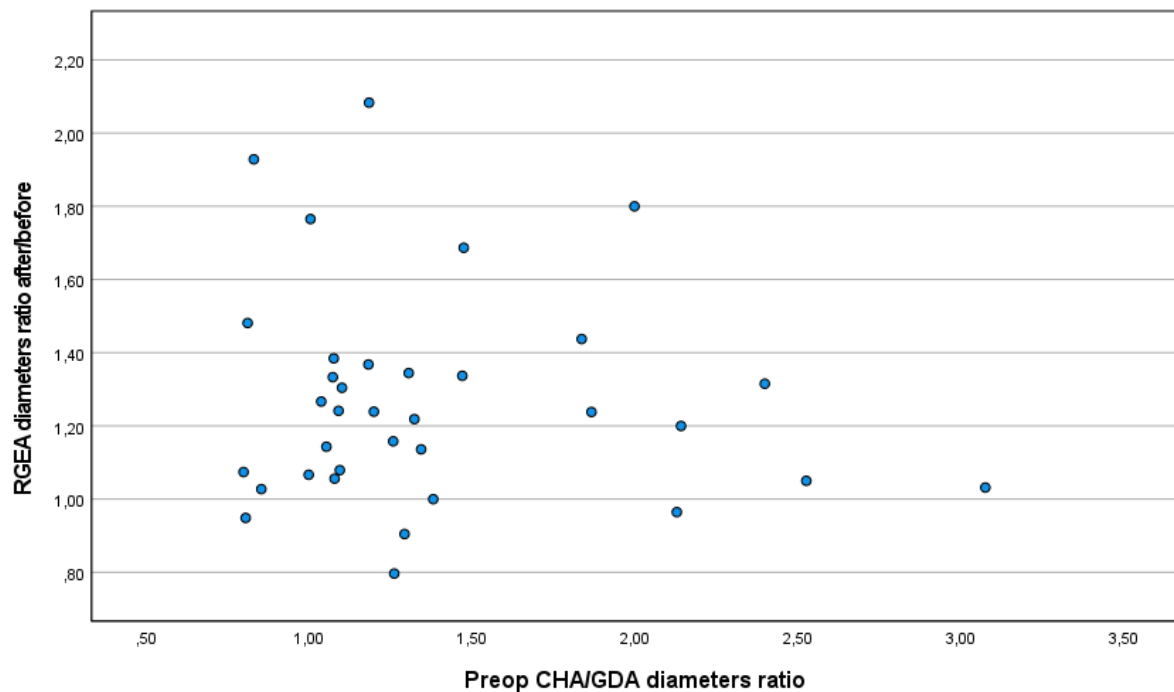

## Correlations

|                                      |                 | Correlations                           |                                           |                                           |                                           |                                            |
|--------------------------------------|-----------------|----------------------------------------|-------------------------------------------|-------------------------------------------|-------------------------------------------|--------------------------------------------|
|                                      |                 | Preop<br>CHA/GDA<br>diameters<br>ratio | GDA<br>diameters<br>ratio<br>after/before | PDA<br>diameters<br>ratio<br>after/before | PHA<br>diameters<br>ratio<br>after/before | RGEA<br>diameters<br>ratio<br>after/before |
| Preop<br>diameters ratio             | Pearson         | 1                                      | .620                                      | -.179                                     | .047                                      | -.109                                      |
|                                      | Correlation     |                                        |                                           |                                           |                                           |                                            |
|                                      | Sig. (2-tailed) |                                        | .000                                      | .283                                      | .778                                      | .535                                       |
|                                      | N               | 38                                     | 38                                        | 38                                        | 38                                        | 35                                         |
| GDA diameters ratio<br>after/before  | Pearson         | .620                                   | 1                                         | -.159                                     | .152                                      | -.073                                      |
|                                      | Correlation     |                                        |                                           |                                           |                                           |                                            |
|                                      | Sig. (2-tailed) | .000                                   |                                           | .341                                      | .361                                      | .678                                       |
|                                      | N               | 38                                     | 38                                        | 38                                        | 38                                        | 35                                         |
| PDA diameters ratio<br>after/before  | Pearson         | -.179                                  | -.159                                     | 1                                         | -.107                                     | .111                                       |
|                                      | Correlation     |                                        |                                           |                                           |                                           |                                            |
|                                      | Sig. (2-tailed) | .283                                   | .341                                      |                                           | .522                                      | .524                                       |
|                                      | N               | 38                                     | 38                                        | 38                                        | 38                                        | 35                                         |
| PHA diameters ratio<br>after/before  | Pearson         | .047                                   | .152                                      | -.107                                     | 1                                         | .403                                       |
|                                      | Correlation     |                                        |                                           |                                           |                                           |                                            |
|                                      | Sig. (2-tailed) | .778                                   | .361                                      | .522                                      |                                           | .016                                       |
|                                      | N               | 38                                     | 38                                        | 38                                        | 38                                        | 35                                         |
| RGEA diameters ratio<br>after/before | Pearson         | -.109                                  | -.073                                     | .111                                      | .403                                      | 1                                          |
|                                      | Correlation     |                                        |                                           |                                           |                                           |                                            |
|                                      | Sig. (2-tailed) | .535                                   | .678                                      | .524                                      | .016                                      |                                            |
|                                      | N               | 35                                     | 35                                        | 35                                        | 35                                        | 35                                         |

# Nonparametric Correlations

|                   |                                         |  |                 | Correlations                               |                                               |                                               |                                               |                                                |
|-------------------|-----------------------------------------|--|-----------------|--------------------------------------------|-----------------------------------------------|-----------------------------------------------|-----------------------------------------------|------------------------------------------------|
|                   |                                         |  |                 | Preop<br>CHA/GD<br>A<br>diameters<br>ratio | GDA<br>diameters<br>ratio<br>after/befo<br>re | PDA<br>diameters<br>ratio<br>after/befo<br>re | PHA<br>diameters<br>ratio<br>after/befo<br>re | RGEA<br>diameters<br>ratio<br>after/befor<br>e |
| Spearman's<br>rho | Preop<br>CHA/GD<br>diameters<br>ratio   |  | Correlation     | 1.000                                      | .534                                          | -.094                                         | .068                                          | -.066                                          |
|                   |                                         |  | Coefficient     |                                            |                                               |                                               |                                               |                                                |
|                   |                                         |  | Sig. (2-tailed) | .                                          | .001                                          | .574                                          | .686                                          | .706                                           |
|                   |                                         |  | N               | 38                                         | 38                                            | 38                                            | 38                                            | 35                                             |
|                   | GDA<br>diameters<br>ratio after/before  |  | Correlation     | .534                                       | 1.000                                         | -.244                                         | .106                                          | -.059                                          |
|                   |                                         |  | Coefficient     |                                            |                                               |                                               |                                               |                                                |
|                   |                                         |  | Sig. (2-tailed) | .001                                       | .                                             | .140                                          | .527                                          | .737                                           |
|                   |                                         |  | N               | 38                                         | 38                                            | 38                                            | 38                                            | 35                                             |
|                   | PDA<br>diameters<br>ratio after/before  |  | Correlation     | -.094                                      | -.244                                         | 1.000                                         | -.072                                         | .268                                           |
|                   |                                         |  | Coefficient     |                                            |                                               |                                               |                                               |                                                |
|                   |                                         |  | Sig. (2-tailed) | .574                                       | .140                                          | .                                             | .669                                          | .120                                           |
|                   |                                         |  | N               | 38                                         | 38                                            | 38                                            | 38                                            | 35                                             |
|                   | PHA<br>diameters<br>ratio after/before  |  | Correlation     | .068                                       | .106                                          | -.072                                         | 1.000                                         | .198                                           |
|                   |                                         |  | Coefficient     |                                            |                                               |                                               |                                               |                                                |
|                   |                                         |  | Sig. (2-tailed) | .686                                       | .527                                          | .669                                          | .                                             | .254                                           |
|                   |                                         |  | N               | 38                                         | 38                                            | 38                                            | 38                                            | 35                                             |
|                   | RGEA<br>diameters<br>ratio after/before |  | Correlation     | -.066                                      | -.059                                         | .268                                          | .198                                          | 1.000                                          |
|                   |                                         |  | Coefficient     |                                            |                                               |                                               |                                               |                                                |
|                   |                                         |  | Sig. (2-tailed) | .706                                       | .737                                          | .120                                          | .254                                          | .                                              |
|                   |                                         |  | N               | 35                                         | 35                                            | 35                                            | 35                                            | 35                                             |

Graph

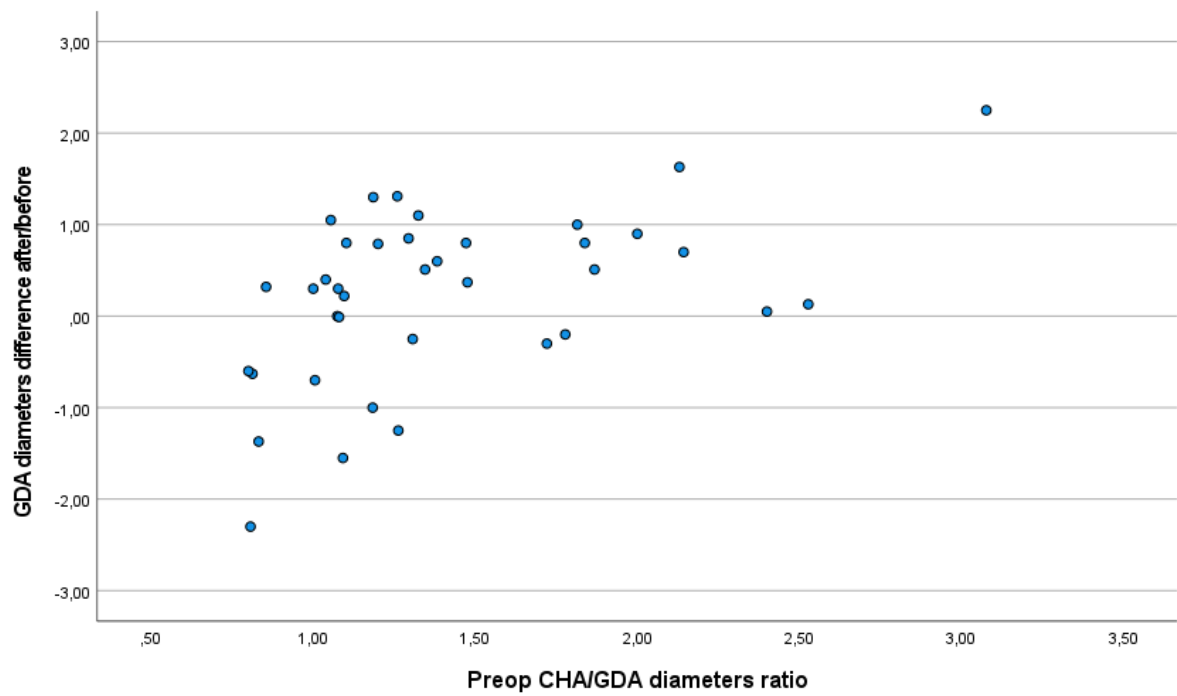

Graph

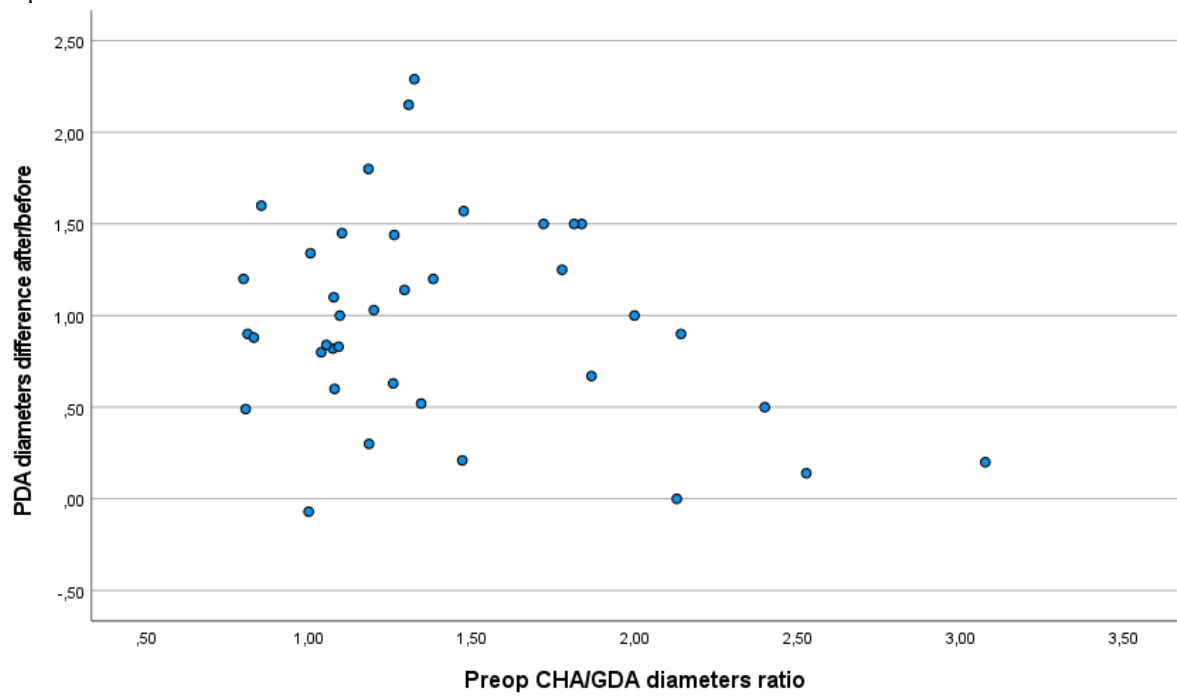

Graph

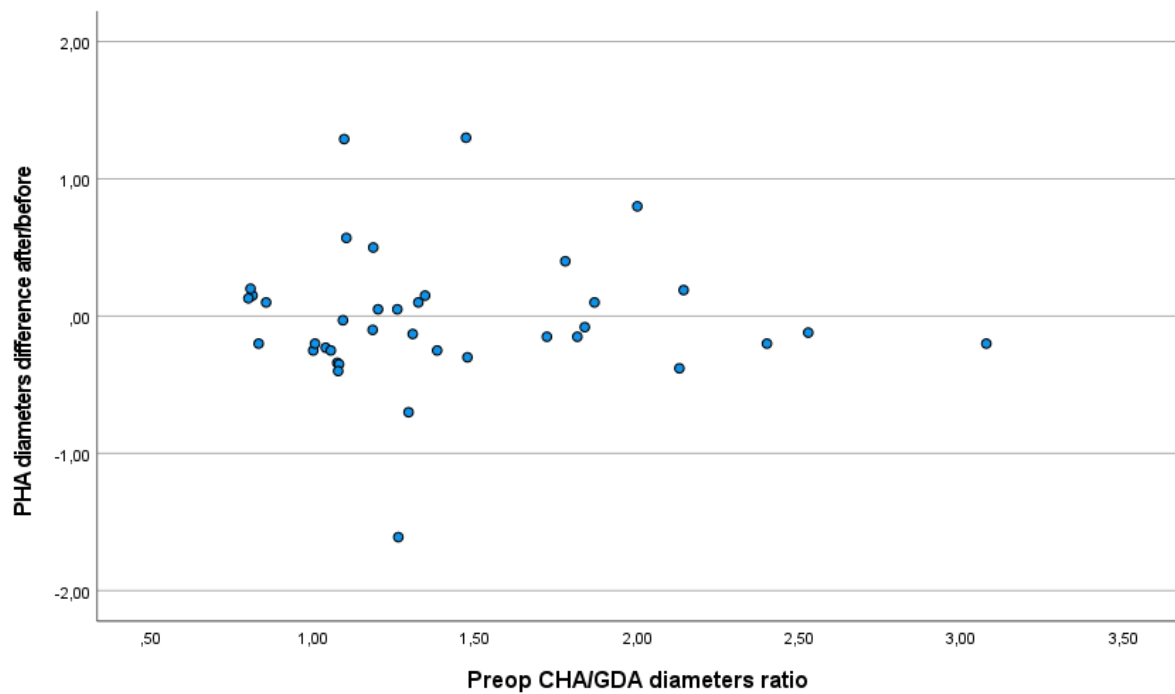

Graph

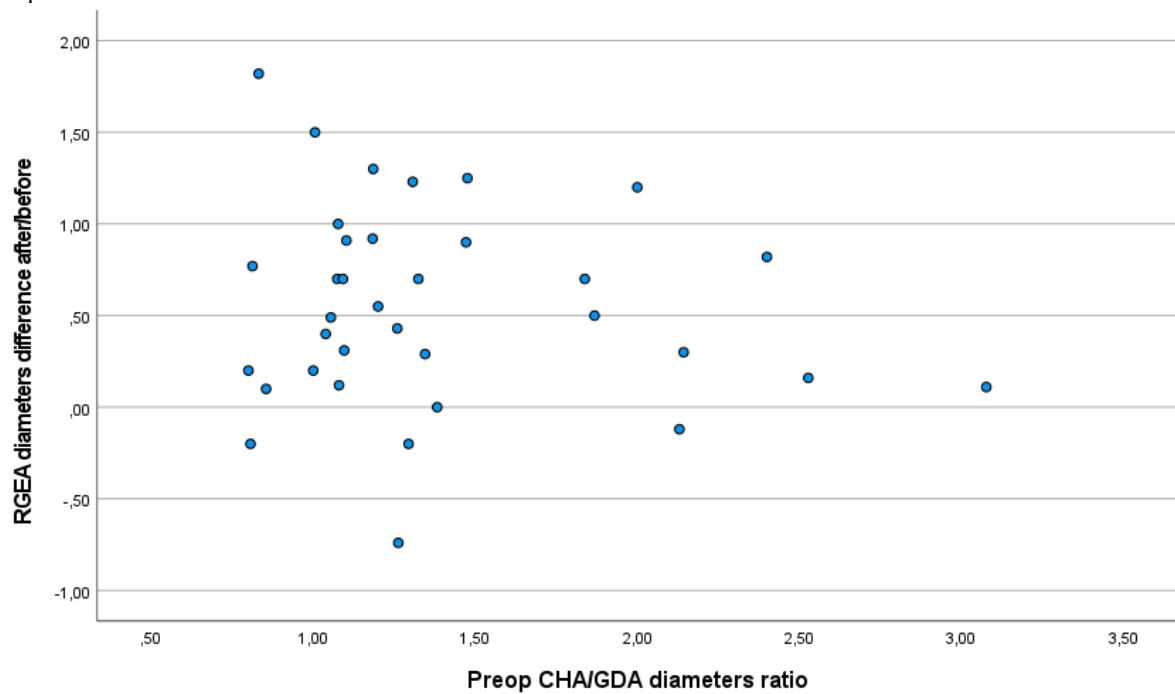

Correlations

| Correlations             |         |                        |                                        |                                                |                                                |                                                 |
|--------------------------|---------|------------------------|----------------------------------------|------------------------------------------------|------------------------------------------------|-------------------------------------------------|
|                          |         |                        | Preop<br>CHA/GDA<br>diameters<br>ratio | GDA<br>diameters<br>difference<br>after/before | PDA<br>diameters<br>difference<br>after/before | PHA<br>diameters<br>difference<br>after/before  |
| Preop<br>diameters ratio | CHA/GDA | Pearson<br>Correlation | 1                                      | .494                                           | -.259                                          | -.008                                           |
|                          |         |                        |                                        |                                                |                                                | RGEA<br>diameters<br>difference<br>after/before |
|                          |         |                        |                                        |                                                |                                                | -.134                                           |



|              |           |                 |       |       |       |       |       |
|--------------|-----------|-----------------|-------|-------|-------|-------|-------|
|              |           | Sig. (2-tailed) |       | .002  | .117  | .960  | .444  |
|              |           | N               | 38    | 38    | 38    | 38    | 35    |
| GDA          | diameters | Pearson         | .494  | 1     | -.187 | .176  | -.055 |
| difference   |           | Correlation     |       |       |       |       |       |
| after/before |           | Sig. (2-tailed) | .002  |       | .261  | .290  | .752  |
|              |           | N               | 38    | 38    | 38    | 38    | 35    |
| PDA          | diameters | Pearson         | -.259 | -.187 | 1     | -.126 | .241  |
| difference   |           | Correlation     |       |       |       |       |       |
| after/before |           | Sig. (2-tailed) | .117  | .261  |       | .450  | .163  |
|              |           | N               | 38    | 38    | 38    | 38    | 35    |
| PHA          | diameters | Pearson         | -.008 | .176  | -.126 | 1     | .349  |
| difference   |           | Correlation     |       |       |       |       |       |
| after/before |           | Sig. (2-tailed) | .960  | .290  | .450  |       | .040  |
|              |           | N               | 38    | 38    | 38    | 38    | 35    |
| RGEA         | diameters | Pearson         | -.134 | -.055 | .241  | .349  | 1     |
| difference   |           | Correlation     |       |       |       |       |       |
| after/before |           | Sig. (2-tailed) | .444  | .752  | .163  | .040  |       |
|              |           | N               | 35    | 35    | 35    | 35    | 35    |

#### Nonparametric Correlations

|                   |                                                |                 |       | Correlations                               |                                                    |                                                    |                                                    |                                                     |
|-------------------|------------------------------------------------|-----------------|-------|--------------------------------------------|----------------------------------------------------|----------------------------------------------------|----------------------------------------------------|-----------------------------------------------------|
|                   |                                                |                 |       | Preop<br>CHA/GD<br>A<br>diameters<br>ratio | GDA<br>diameters<br>difference<br>after/befo<br>re | PDA<br>diameters<br>difference<br>after/befo<br>re | PHA<br>diameters<br>difference<br>after/befo<br>re | RGEA<br>diameters<br>difference<br>after/befor<br>e |
| Spearman's<br>rho | Preop<br>CHA/GDA<br>diameters<br>ratio         | Correlation     | 1.000 |                                            | .474                                               | -.068                                              | .026                                               | -.061                                               |
|                   |                                                | Coefficient     |       |                                            |                                                    |                                                    |                                                    |                                                     |
|                   |                                                | Sig. (2-tailed) | .     | .003                                       | .686                                               | .878                                               | .726                                               |                                                     |
|                   |                                                | N               | 38    | 38                                         | 38                                                 | 38                                                 | 35                                                 |                                                     |
|                   | GDA<br>diameters<br>difference<br>after/before | Correlation     | .474  | 1.000                                      | -.166                                              | .057                                               | -.095                                              |                                                     |
|                   |                                                | Coefficient     |       |                                            |                                                    |                                                    |                                                    |                                                     |
|                   |                                                | Sig. (2-tailed) | .003  | .                                          | .318                                               | .732                                               | .587                                               |                                                     |
|                   |                                                | N               | 38    | 38                                         | 38                                                 | 38                                                 | 35                                                 |                                                     |
|                   | PDA<br>diameters<br>difference<br>after/before | Correlation     | -.068 | -.166                                      | 1.000                                              | -.002                                              | .255                                               |                                                     |
|                   |                                                | Coefficient     |       |                                            |                                                    |                                                    |                                                    |                                                     |
|                   |                                                | Sig. (2-tailed) | .686  | .318                                       | .                                                  | .990                                               | .139                                               |                                                     |
|                   |                                                | N               | 38    | 38                                         | 38                                                 | 38                                                 | 35                                                 |                                                     |
|                   | PHA<br>diameters<br>difference<br>after/before | Correlation     | .026  | .057                                       | -.002                                              | 1.000                                              | .235                                               |                                                     |
|                   |                                                | Coefficient     |       |                                            |                                                    |                                                    |                                                    |                                                     |
|                   |                                                | Sig. (2-tailed) | .878  | .732                                       | .990                                               | .                                                  | .174                                               |                                                     |
|                   |                                                | N               | 38    | 38                                         | 38                                                 | 38                                                 | 35                                                 |                                                     |

|              |           |                 |       |       |      |      |       |
|--------------|-----------|-----------------|-------|-------|------|------|-------|
| RGEA         | diameters | Correlation     | -.061 | -.095 | .255 | .235 | 1.000 |
| difference   |           | Coefficient     |       |       |      |      |       |
| after/before |           | Sig. (2-tailed) | .726  | .587  | .139 | .174 | .     |
|              |           | N               | 35    | 35    | 35   | 35   | 35    |

Graph

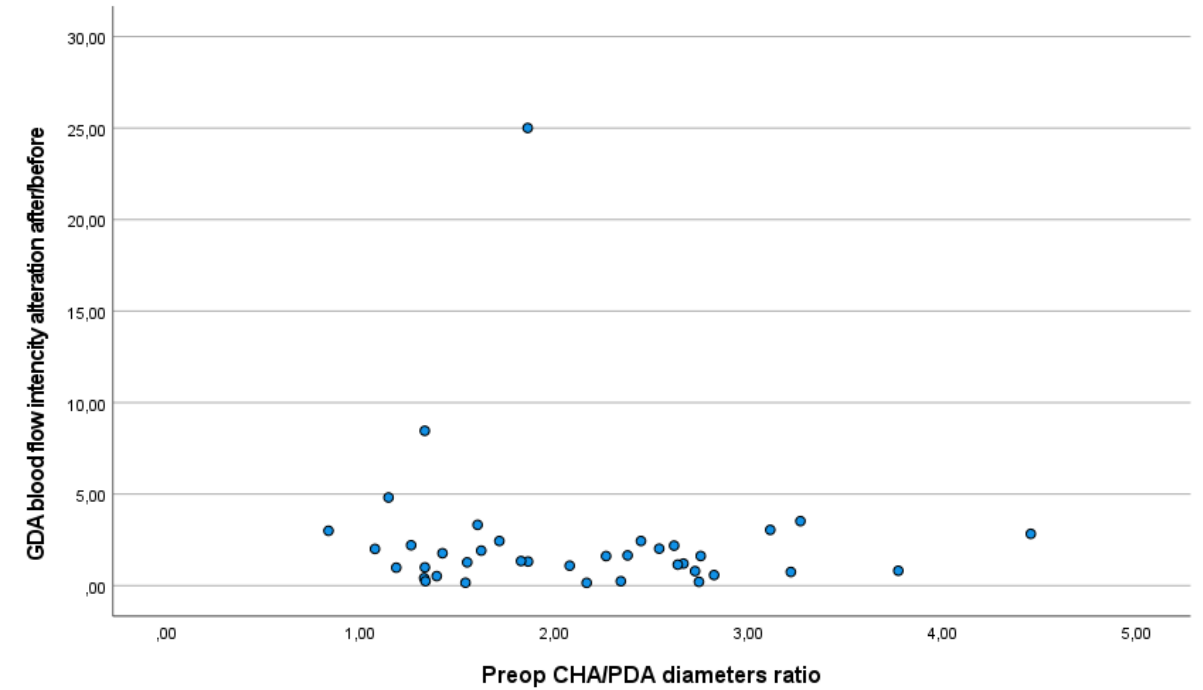

Graph

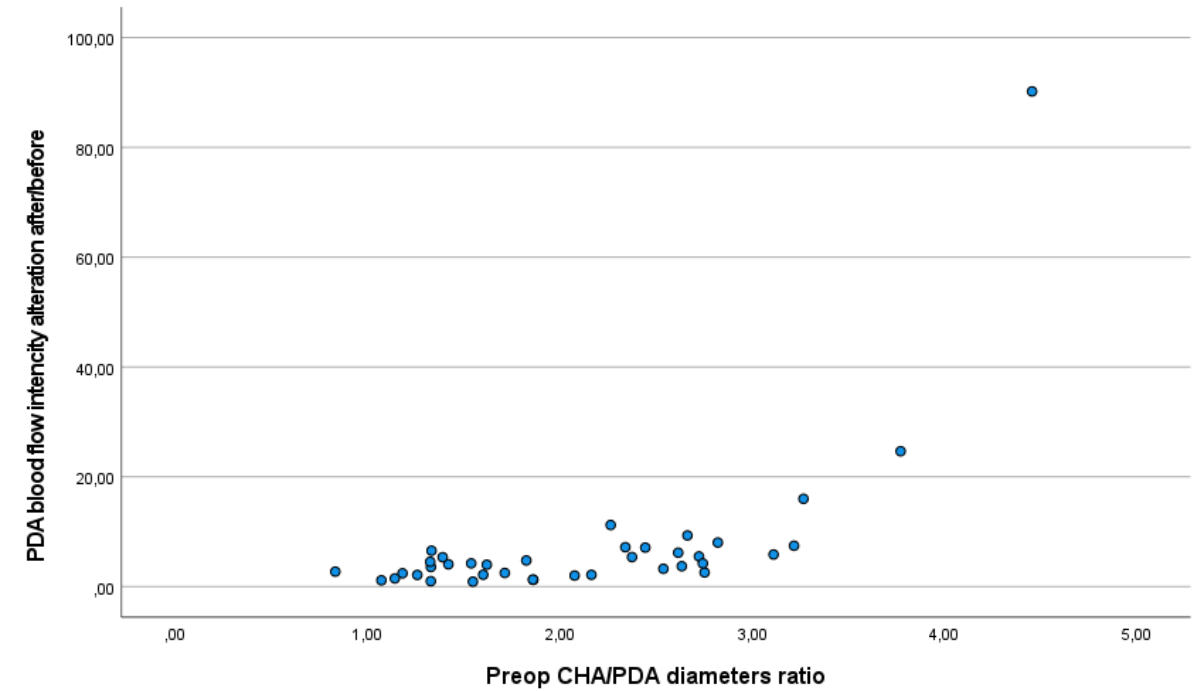

Graph

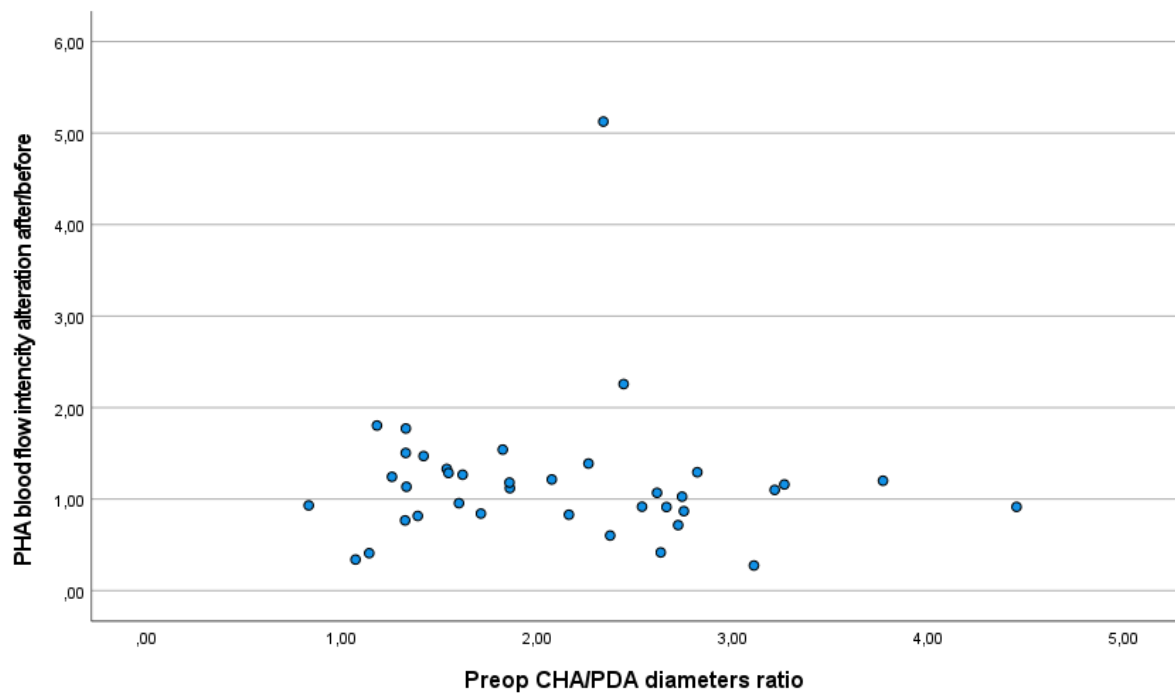

Graph

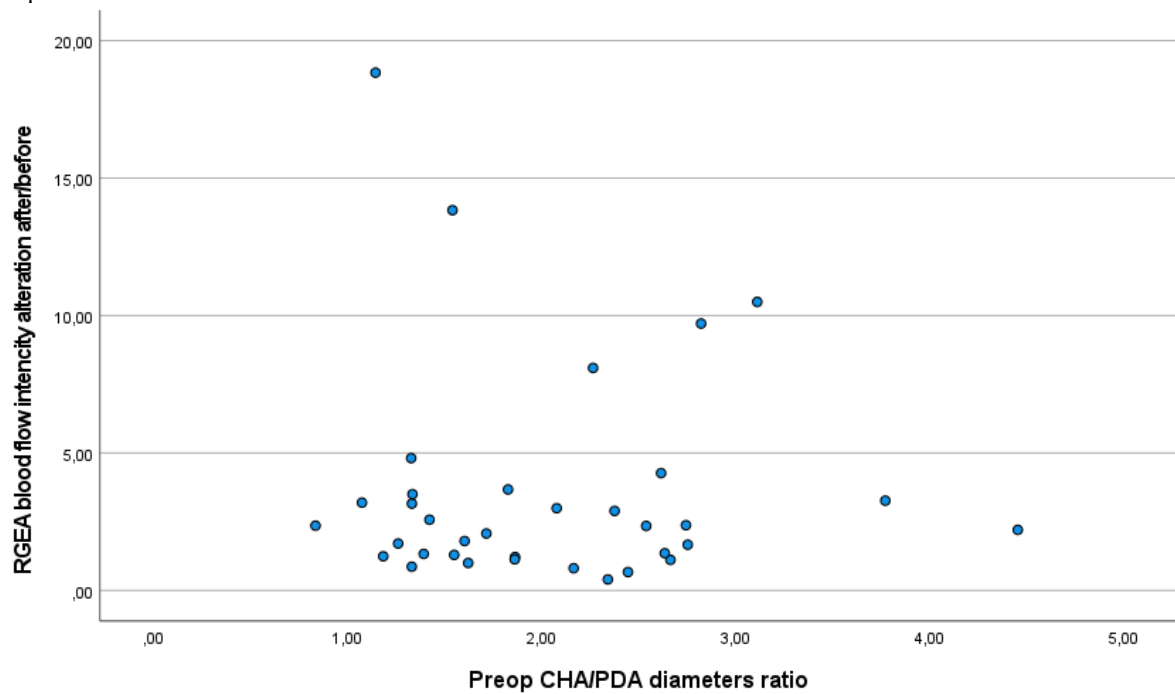

Correlations

Correlations

| Preop<br>CHA/PDA<br>diameters<br>ratio | GDA blood<br>flow<br>intensity<br>alteration<br>after/before | PDA blood<br>flow<br>intensity<br>alteration<br>after/before | PHA blood<br>flow<br>intensity<br>alteration<br>after/before | RGEA<br>blood flow<br>intensity<br>alteration<br>after/before |
|----------------------------------------|--------------------------------------------------------------|--------------------------------------------------------------|--------------------------------------------------------------|---------------------------------------------------------------|
|----------------------------------------|--------------------------------------------------------------|--------------------------------------------------------------|--------------------------------------------------------------|---------------------------------------------------------------|

|                                                         |         |                 |       |       |       |       |       |
|---------------------------------------------------------|---------|-----------------|-------|-------|-------|-------|-------|
| Preop<br>diameters ratio                                | CHA/PDA | Pearson         | 1     | -.092 | .633  | -.030 | -.040 |
|                                                         |         | Correlation     |       |       |       |       |       |
|                                                         |         | Sig. (2-tailed) |       | .583  | .000  | .857  | .819  |
|                                                         |         | N               | 38    | 38    | 38    | 38    | 35    |
| GDA blood flow<br>intensity alteration<br>after/before  |         | Pearson         | -.092 | 1     | -.042 | -.057 | -.057 |
|                                                         |         | Correlation     |       |       |       |       |       |
|                                                         |         | Sig. (2-tailed) | .583  |       | .800  | .735  | .744  |
|                                                         |         | N               | 38    | 38    | 38    | 38    | 35    |
| PDA blood flow<br>intensity alteration<br>after/before  |         | Pearson         | .633  | -.042 | 1     | -.015 | -.033 |
|                                                         |         | Correlation     |       |       |       |       |       |
|                                                         |         | Sig. (2-tailed) | .000  | .800  |       | .926  | .851  |
|                                                         |         | N               | 38    | 38    | 38    | 38    | 35    |
| PHA blood flow<br>intensity alteration<br>after/before  |         | Pearson         | -.030 | -.057 | -.015 | 1     | -.246 |
|                                                         |         | Correlation     |       |       |       |       |       |
|                                                         |         | Sig. (2-tailed) | .857  | .735  | .926  |       | .155  |
|                                                         |         | N               | 38    | 38    | 38    | 38    | 35    |
| RGEA blood flow<br>intensity alteration<br>after/before |         | Pearson         | -.040 | -.057 | -.033 | -.246 | 1     |
|                                                         |         | Correlation     |       |       |       |       |       |
|                                                         |         | Sig. (2-tailed) | .819  | .744  | .851  | .155  |       |
|                                                         |         | N               | 35    | 35    | 35    | 35    | 35    |

#### Nonparametric Correlations

|                   |                                                        |                 |       | Correlations                               |                                                                     |                                                                     |                                                                     |                                                                      |
|-------------------|--------------------------------------------------------|-----------------|-------|--------------------------------------------|---------------------------------------------------------------------|---------------------------------------------------------------------|---------------------------------------------------------------------|----------------------------------------------------------------------|
|                   |                                                        |                 |       | Preop<br>CHA/PD<br>A<br>diameters<br>ratio | GDA<br>blood<br>flow<br>intensity<br>alteration<br>after/befo<br>re | PDA<br>blood<br>flow<br>intensity<br>alteration<br>after/befo<br>re | PHA<br>blood<br>flow<br>intensity<br>alteration<br>after/befo<br>re | RGEA<br>blood<br>flow<br>intensity<br>alteration<br>after/befor<br>e |
| Spearman's<br>rho | Preop<br>diameters ratio                               | Correlation     | 1.000 |                                            | -.089                                                               | .635                                                                | -.131                                                               | -.023                                                                |
|                   |                                                        | Coefficient     |       |                                            |                                                                     |                                                                     |                                                                     |                                                                      |
|                   |                                                        | Sig. (2-tailed) | .     |                                            | .594                                                                | .000                                                                | .432                                                                | .897                                                                 |
|                   |                                                        | N               | 38    |                                            | 38                                                                  | 38                                                                  | 38                                                                  | 35                                                                   |
|                   | GDA blood flow<br>intensity alteration<br>after/before | Correlation     | -.089 | 1.000                                      |                                                                     | -.246                                                               | -.109                                                               | -.057                                                                |
|                   |                                                        | Coefficient     |       |                                            |                                                                     |                                                                     |                                                                     |                                                                      |
|                   |                                                        | Sig. (2-tailed) | .594  |                                            | .                                                                   | .137                                                                | .515                                                                | .746                                                                 |
|                   |                                                        | N               | 38    | 38                                         | 38                                                                  | 38                                                                  | 38                                                                  | 35                                                                   |
|                   | PDA blood flow<br>intensity alteration<br>after/before | Correlation     | .635  | -.246                                      | 1.000                                                               |                                                                     | .072                                                                | .268                                                                 |
|                   |                                                        | Coefficient     |       |                                            |                                                                     |                                                                     |                                                                     |                                                                      |
|                   |                                                        | Sig. (2-tailed) | .000  | .137                                       | .                                                                   |                                                                     | .669                                                                | .120                                                                 |
|                   |                                                        | N               | 38    | 38                                         | 38                                                                  | 38                                                                  | 38                                                                  | 35                                                                   |

|                                                         |                 |       |       |      |       |       |
|---------------------------------------------------------|-----------------|-------|-------|------|-------|-------|
| PHA blood flow<br>intensity alteration<br>after/before  | Correlation     | -.131 | -.109 | .072 | 1.000 | -.198 |
|                                                         | Coefficient     |       |       |      |       |       |
|                                                         | Sig. (2-tailed) | .432  | .515  | .669 | .     | .254  |
|                                                         | N               | 38    | 38    | 38   | 38    | 35    |
| RGEA blood flow<br>intensity alteration<br>after/before | Correlation     | -.023 | -.057 | .268 | -.198 | 1.000 |
|                                                         | Coefficient     |       |       |      |       |       |
|                                                         | Sig. (2-tailed) | .897  | .746  | .120 | .254  | .     |
|                                                         | N               | 35    | 35    | 35   | 35    | 35    |

Graph

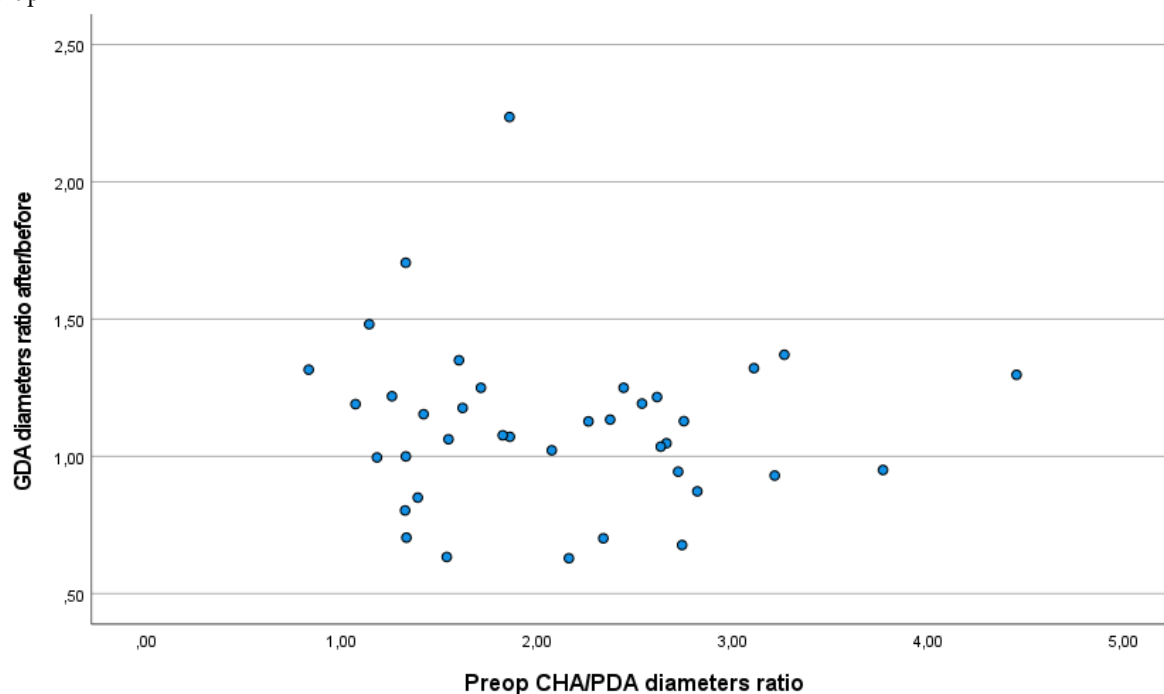

Graph

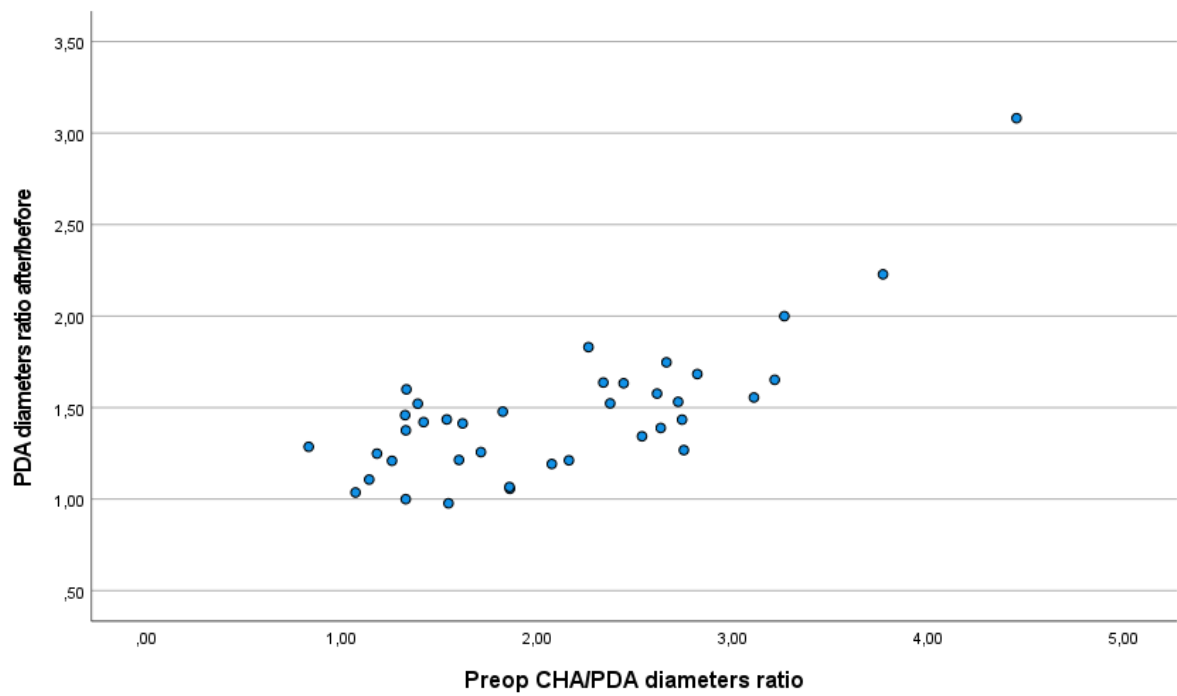

Graph

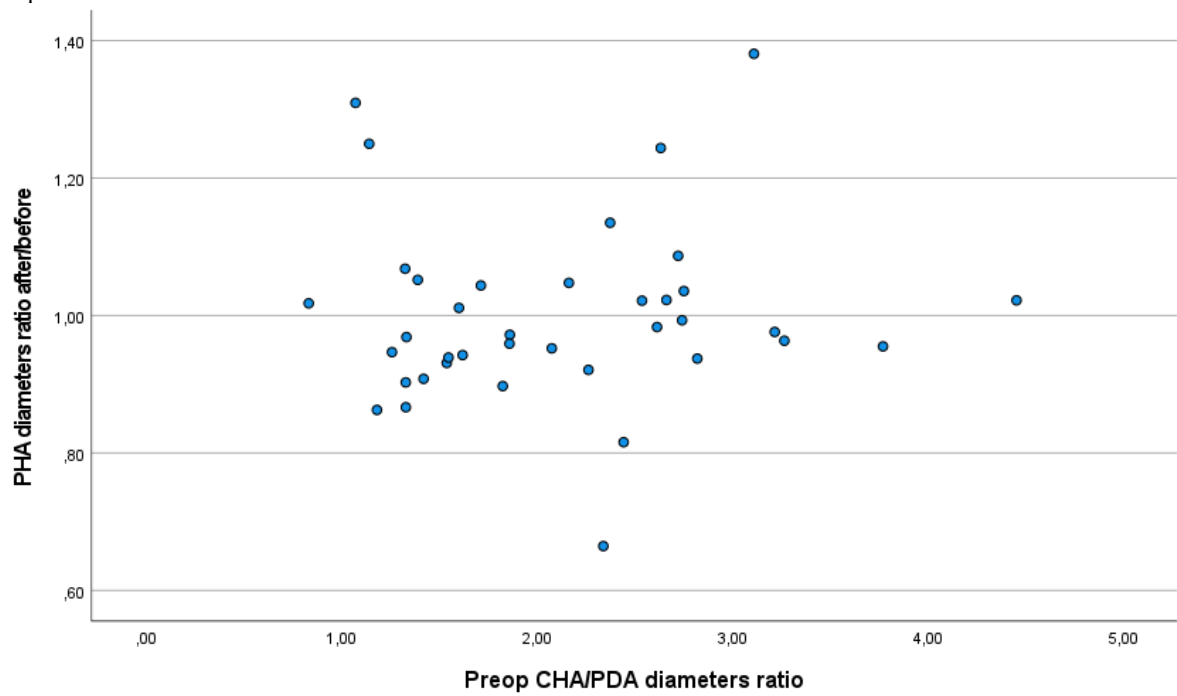

Graph

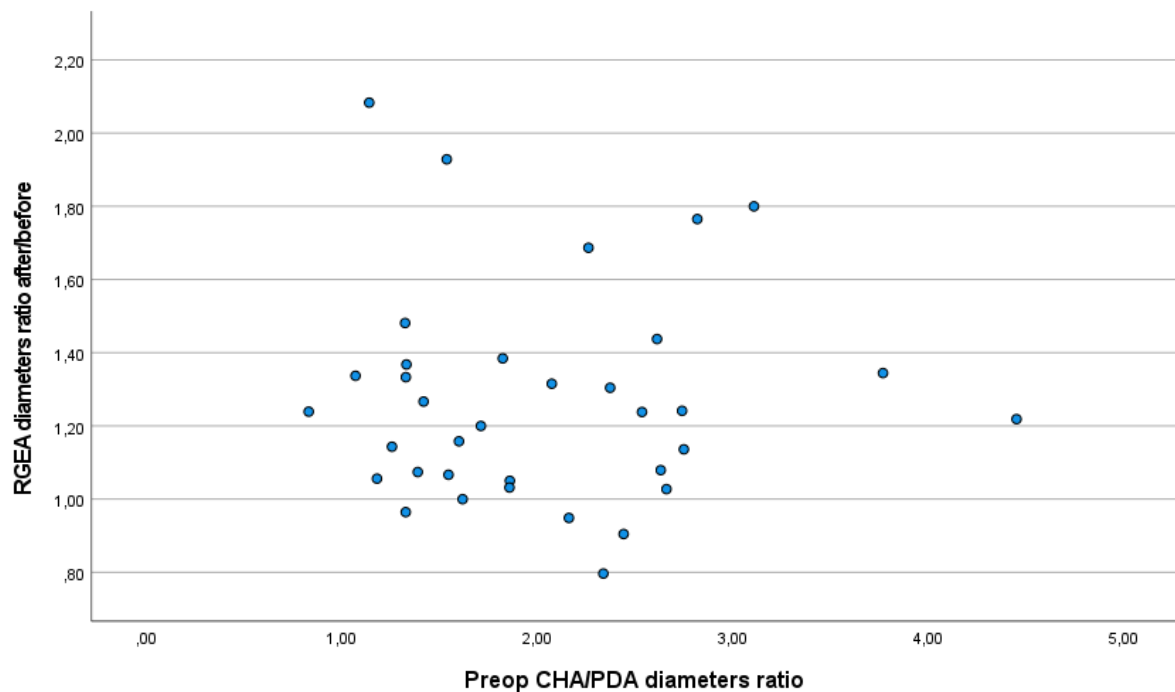

#### Correlations

| Correlations                         |                 |                                        |                                           |                                           |                                           |                                            |
|--------------------------------------|-----------------|----------------------------------------|-------------------------------------------|-------------------------------------------|-------------------------------------------|--------------------------------------------|
|                                      |                 | Preop<br>CHA/PDA<br>diameters<br>ratio | GDA<br>diameters<br>ratio<br>after/before | PDA<br>diameters<br>ratio<br>after/before | PHA<br>diameters<br>ratio<br>after/before | RGEA<br>diameters<br>ratio<br>after/before |
| Preop<br>CHA/PDA<br>diameters ratio  | Pearson         | 1                                      | -.068                                     | .754                                      | .059                                      | .007                                       |
|                                      | Correlation     |                                        |                                           |                                           |                                           |                                            |
|                                      | Sig. (2-tailed) |                                        | .687                                      | .000                                      | .726                                      | .968                                       |
|                                      | N               | 38                                     | 38                                        | 38                                        | 38                                        | 35                                         |
| GDA diameters ratio<br>after/before  | Pearson         | -.068                                  | 1                                         | -.159                                     | .152                                      | -.073                                      |
|                                      | Correlation     |                                        |                                           |                                           |                                           |                                            |
|                                      | Sig. (2-tailed) | .687                                   |                                           | .341                                      | .361                                      | .678                                       |
|                                      | N               | 38                                     | 38                                        | 38                                        | 38                                        | 35                                         |
| PDA diameters ratio<br>after/before  | Pearson         | .754                                   | -.159                                     | 1                                         | -.107                                     | .111                                       |
|                                      | Correlation     |                                        |                                           |                                           |                                           |                                            |
|                                      | Sig. (2-tailed) | .000                                   | .341                                      |                                           | .522                                      | .524                                       |
|                                      | N               | 38                                     | 38                                        | 38                                        | 38                                        | 35                                         |
| PHA diameters ratio<br>after/before  | Pearson         | .059                                   | .152                                      | -.107                                     | 1                                         | .403                                       |
|                                      | Correlation     |                                        |                                           |                                           |                                           |                                            |
|                                      | Sig. (2-tailed) | .726                                   | .361                                      | .522                                      |                                           | .016                                       |
|                                      | N               | 38                                     | 38                                        | 38                                        | 38                                        | 35                                         |
| RGEA diameters ratio<br>after/before | Pearson         | .007                                   | -.073                                     | .111                                      | .403                                      | 1                                          |
|                                      | Correlation     |                                        |                                           |                                           |                                           |                                            |
|                                      | Sig. (2-tailed) | .968                                   | .678                                      | .524                                      | .016                                      |                                            |
|                                      | N               | 35                                     | 35                                        | 35                                        | 35                                        | 35                                         |

# Nonparametric Correlations

|                   |                                         |                                                    |  | Correlations                               |                                               |                                               |                                               |                                                |
|-------------------|-----------------------------------------|----------------------------------------------------|--|--------------------------------------------|-----------------------------------------------|-----------------------------------------------|-----------------------------------------------|------------------------------------------------|
|                   |                                         |                                                    |  | Preop<br>CHA/PD<br>A<br>diameters<br>ratio | GDA<br>diameters<br>ratio<br>after/befo<br>re | PDA<br>diameters<br>ratio<br>after/befo<br>re | PHA<br>diameters<br>ratio<br>after/befo<br>re | RGEA<br>diameters<br>ratio<br>after/befor<br>e |
| Spearman's<br>rho | Preop<br>CHA/PDA<br>diameters ratio     | Correlation<br>Coefficient<br>Sig. (2-tailed)<br>N |  | 1.000                                      | -.088                                         | .635                                          | .131                                          | -.023                                          |
|                   |                                         |                                                    |  |                                            |                                               |                                               |                                               |                                                |
|                   |                                         |                                                    |  |                                            |                                               |                                               |                                               |                                                |
|                   |                                         |                                                    |  |                                            |                                               |                                               |                                               |                                                |
|                   | GDA<br>diameters<br>ratio after/before  | Correlation<br>Coefficient<br>Sig. (2-tailed)<br>N |  | -.088                                      | 1.000                                         | -.244                                         | .106                                          | -.059                                          |
|                   |                                         |                                                    |  |                                            |                                               |                                               |                                               |                                                |
|                   |                                         |                                                    |  |                                            |                                               |                                               |                                               |                                                |
|                   |                                         |                                                    |  |                                            |                                               |                                               |                                               |                                                |
|                   | PDA<br>diameters<br>ratio after/before  | Correlation<br>Coefficient<br>Sig. (2-tailed)<br>N |  | .635                                       | -.244                                         | 1.000                                         | -.072                                         | .268                                           |
|                   |                                         |                                                    |  |                                            |                                               |                                               |                                               |                                                |
|                   |                                         |                                                    |  |                                            |                                               |                                               |                                               |                                                |
|                   |                                         |                                                    |  |                                            |                                               |                                               |                                               |                                                |
|                   | PHA<br>diameters<br>ratio after/before  | Correlation<br>Coefficient<br>Sig. (2-tailed)<br>N |  | .131                                       | .106                                          | -.072                                         | 1.000                                         | .198                                           |
|                   |                                         |                                                    |  |                                            |                                               |                                               |                                               |                                                |
|                   |                                         |                                                    |  |                                            |                                               |                                               |                                               |                                                |
|                   |                                         |                                                    |  |                                            |                                               |                                               |                                               |                                                |
|                   | RGEA<br>diameters<br>ratio after/before | Correlation<br>Coefficient<br>Sig. (2-tailed)<br>N |  | -.023                                      | -.059                                         | .268                                          | .198                                          | 1.000                                          |
|                   |                                         |                                                    |  |                                            |                                               |                                               |                                               |                                                |
|                   |                                         |                                                    |  |                                            |                                               |                                               |                                               |                                                |
|                   |                                         |                                                    |  |                                            |                                               |                                               |                                               |                                                |

Graph



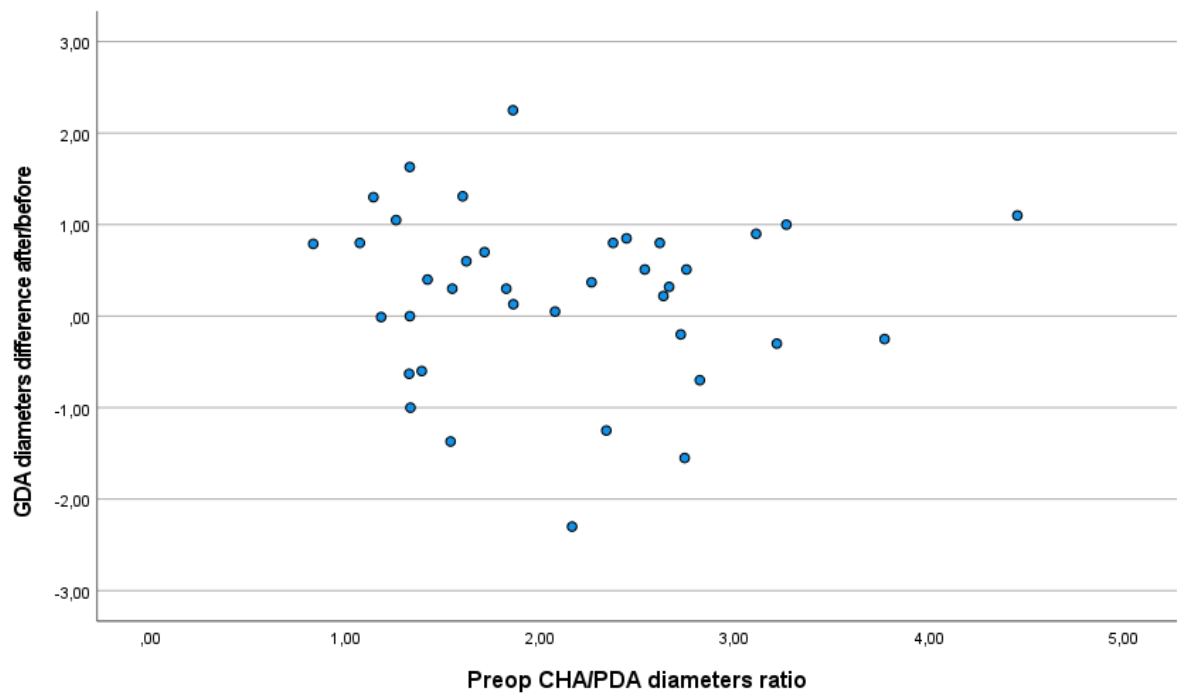

Graph

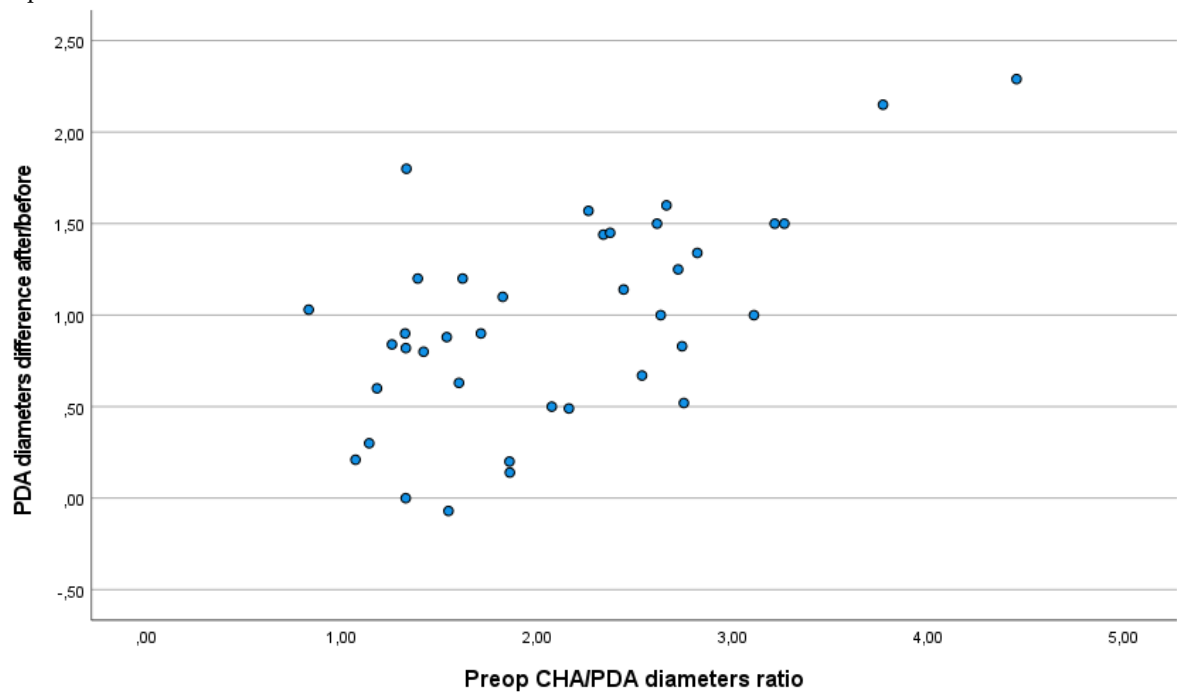

Graph

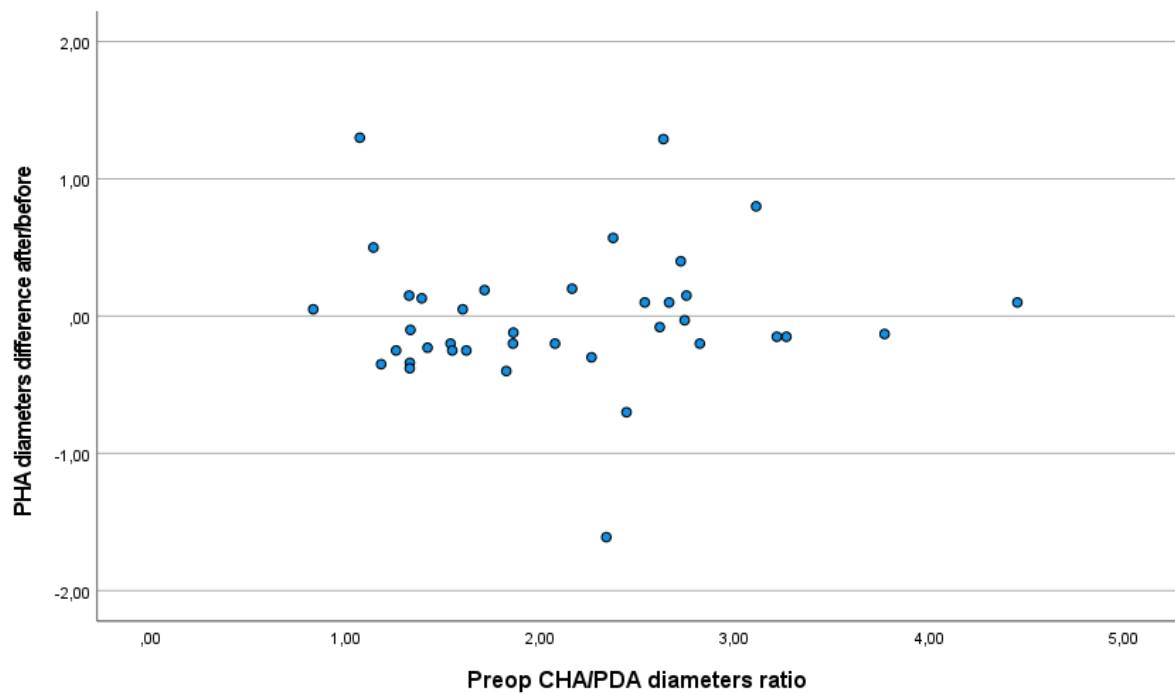

Graph

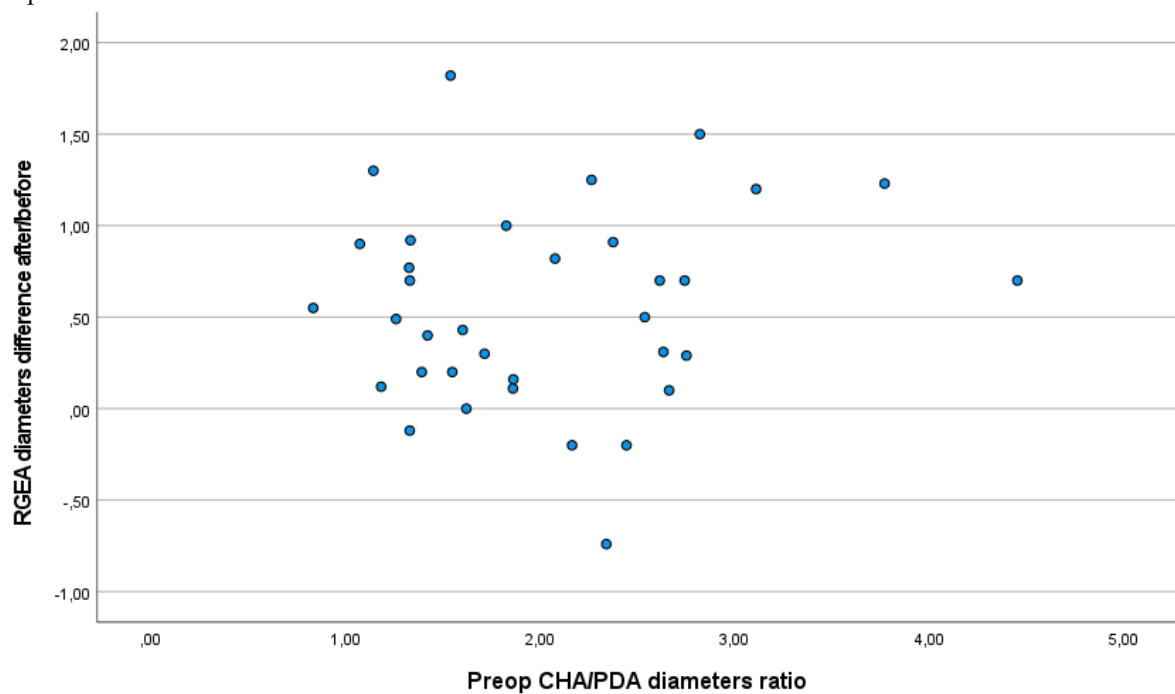

Correlations

| Correlations                           |                 |  |                                        |                                                |                                                |                                                 |
|----------------------------------------|-----------------|--|----------------------------------------|------------------------------------------------|------------------------------------------------|-------------------------------------------------|
|                                        |                 |  | Preop<br>CHA/PDA<br>diameters<br>ratio | GDA<br>diameters<br>difference<br>after/before | PDA<br>diameters<br>difference<br>after/before | PHA<br>diameters<br>difference<br>after/before  |
| Preop<br>CHA/PDA<br>diameters<br>ratio | Pearson         |  | 1                                      | -.052                                          | .607                                           | .040                                            |
|                                        | Correlation     |  |                                        |                                                |                                                |                                                 |
|                                        | Sig. (2-tailed) |  |                                        | .758                                           | .000                                           | .810                                            |
|                                        |                 |  |                                        |                                                |                                                | RGEA<br>diameters<br>difference<br>after/before |
|                                        |                 |  |                                        |                                                |                                                | .113                                            |
|                                        |                 |  |                                        |                                                |                                                | .518                                            |

|              |           |                 |       |       |       |       |       |
|--------------|-----------|-----------------|-------|-------|-------|-------|-------|
|              |           | N               | 38    | 38    | 38    | 38    | 35    |
| GDA          | diameters | Pearson         | -.052 | 1     | -.187 | .176  | -.055 |
| difference   |           | Correlation     |       |       |       |       |       |
| after/before |           | Sig. (2-tailed) | .758  |       | .261  | .290  | .752  |
|              |           | N               | 38    | 38    | 38    | 38    | 35    |
| PDA          | diameters | Pearson         | .607  | -.187 | 1     | -.126 | .241  |
| difference   |           | Correlation     |       |       |       |       |       |
| after/before |           | Sig. (2-tailed) | .000  | .261  |       | .450  | .163  |
|              |           | N               | 38    | 38    | 38    | 38    | 35    |
| PHA          | diameters | Pearson         | .040  | .176  | -.126 | 1     | .349  |
| difference   |           | Correlation     |       |       |       |       |       |
| after/before |           | Sig. (2-tailed) | .810  | .290  | .450  |       | .040  |
|              |           | N               | 38    | 38    | 38    | 38    | 35    |
| RGEA         | diameters | Pearson         | .113  | -.055 | .241  | .349  | 1     |
| difference   |           | Correlation     |       |       |       |       |       |
| after/before |           | Sig. (2-tailed) | .518  | .752  | .163  | .040  |       |
|              |           | N               | 35    | 35    | 35    | 35    | 35    |

#### Nonparametric Correlations

|                   |                                                | Correlations                               |                                                    |                                                    |                                                    |                                                     |       |
|-------------------|------------------------------------------------|--------------------------------------------|----------------------------------------------------|----------------------------------------------------|----------------------------------------------------|-----------------------------------------------------|-------|
|                   |                                                | Preop<br>CHA/PD<br>A<br>diameters<br>ratio | GDA<br>diameters<br>difference<br>after/befo<br>re | PDA<br>diameters<br>difference<br>after/befo<br>re | PHA<br>diameters<br>difference<br>after/befo<br>re | RGEA<br>diameters<br>difference<br>after/befo<br>re |       |
| Spearman's<br>rho | Preop<br>CHA/PDA<br>diameters ratio            | Correlation                                | 1.000                                              | -.089                                              | .511                                               | .144                                                | .051  |
|                   |                                                | Coefficient                                |                                                    |                                                    |                                                    |                                                     |       |
|                   |                                                | Sig. (2-tailed)                            | .                                                  | .597                                               | .001                                               | .389                                                | .771  |
|                   |                                                | N                                          | 38                                                 | 38                                                 | 38                                                 | 38                                                  | 35    |
|                   | GDA<br>diameters<br>difference<br>after/before | Correlation                                | -.089                                              | 1.000                                              | -.166                                              | .057                                                | -.095 |
|                   |                                                | Coefficient                                |                                                    |                                                    |                                                    |                                                     |       |
|                   |                                                | Sig. (2-tailed)                            | .597                                               | .                                                  | .318                                               | .732                                                | .587  |
|                   |                                                | N                                          | 38                                                 | 38                                                 | 38                                                 | 38                                                  | 35    |
|                   | PDA<br>diameters<br>difference<br>after/before | Correlation                                | .511                                               | -.166                                              | 1.000                                              | -.002                                               | .255  |
|                   |                                                | Coefficient                                |                                                    |                                                    |                                                    |                                                     |       |
|                   |                                                | Sig. (2-tailed)                            | .001                                               | .318                                               | .                                                  | .990                                                | .139  |
|                   |                                                | N                                          | 38                                                 | 38                                                 | 38                                                 | 38                                                  | 35    |
|                   | PHA<br>diameters<br>difference<br>after/before | Correlation                                | .144                                               | .057                                               | -.002                                              | 1.000                                               | .235  |
|                   |                                                | Coefficient                                |                                                    |                                                    |                                                    |                                                     |       |
|                   |                                                | Sig. (2-tailed)                            | .389                                               | .732                                               | .990                                               | .                                                   | .174  |
|                   |                                                | N                                          | 38                                                 | 38                                                 | 38                                                 | 38                                                  | 35    |

|                                        |                         |      |       |      |      |       |
|----------------------------------------|-------------------------|------|-------|------|------|-------|
| RGEA diameters difference after/before | Correlation Coefficient | .051 | -.095 | .255 | .235 | 1.000 |
|                                        | Sig. (2-tailed)         | .771 | .587  | .139 | .174 | .     |
|                                        | N                       | 35   | 35    | 35   | 35   | 35    |

Graph

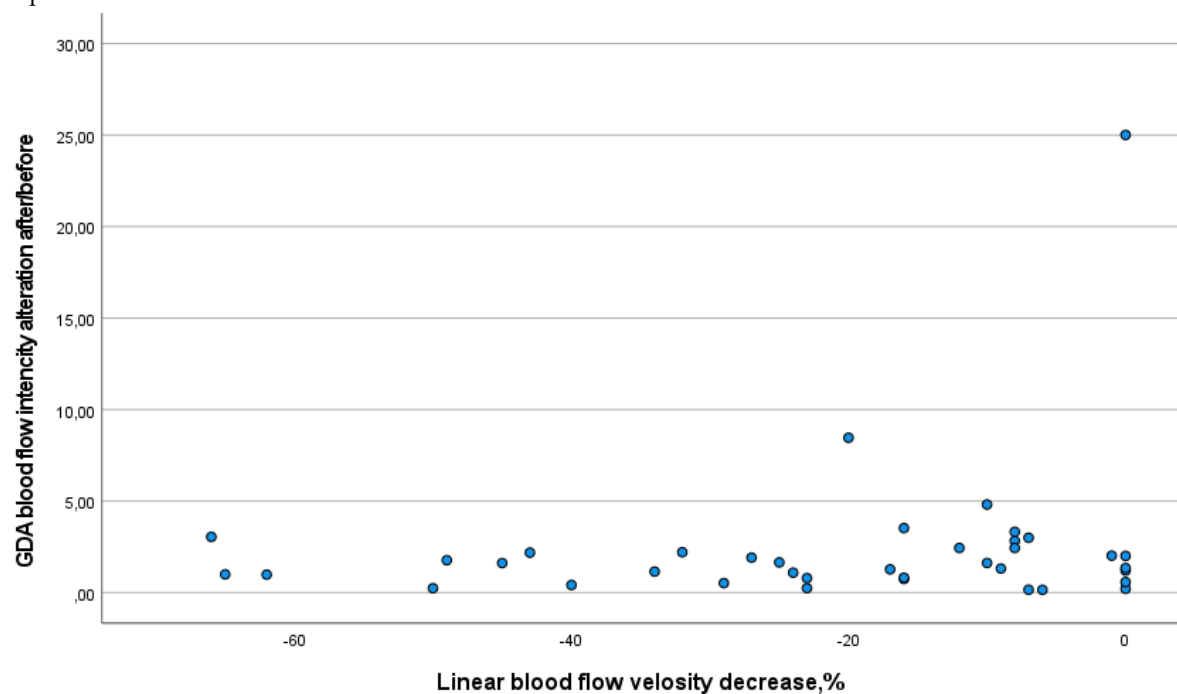

Graph

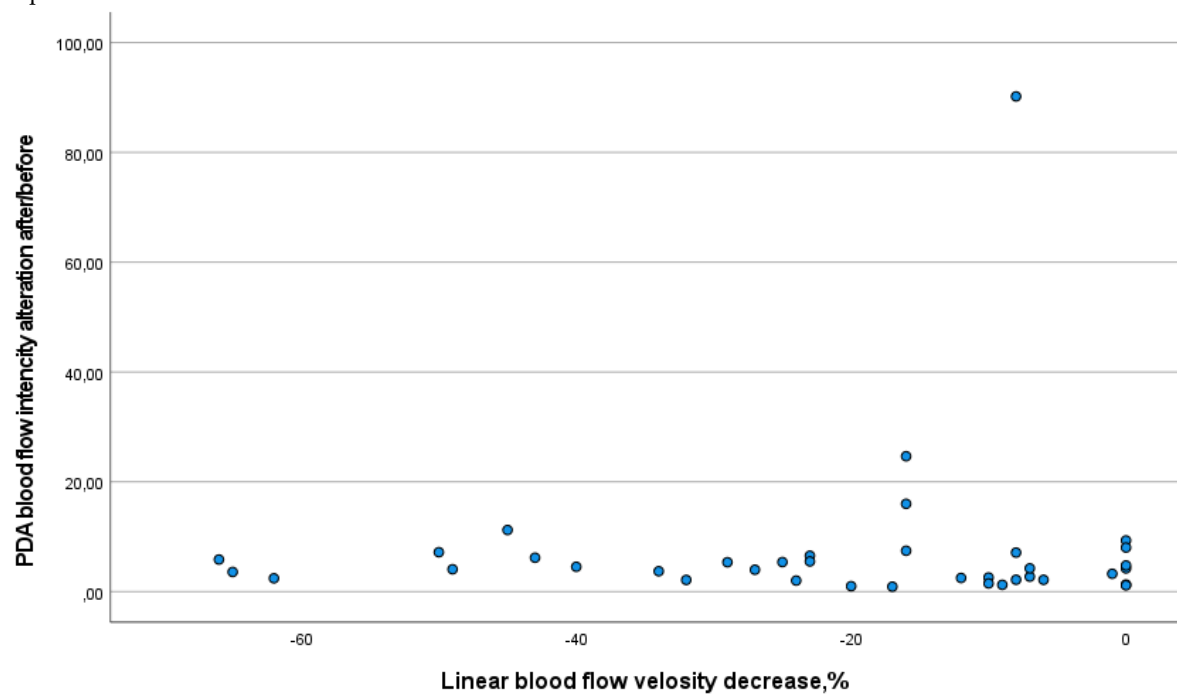

Graph

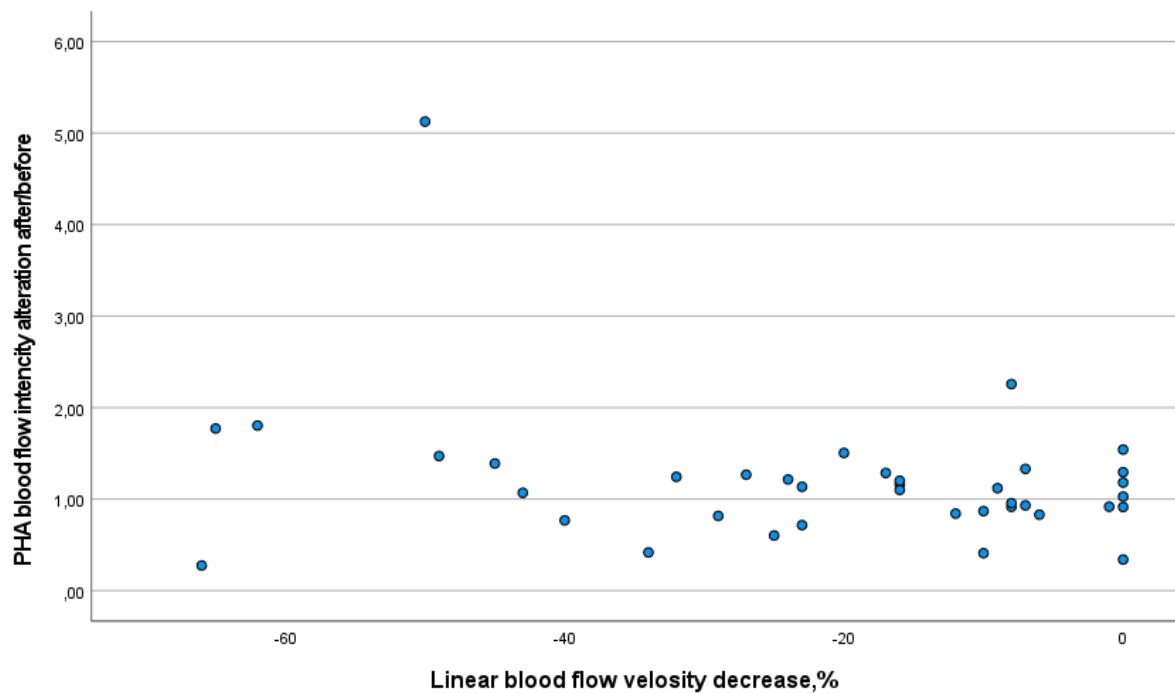

Graph

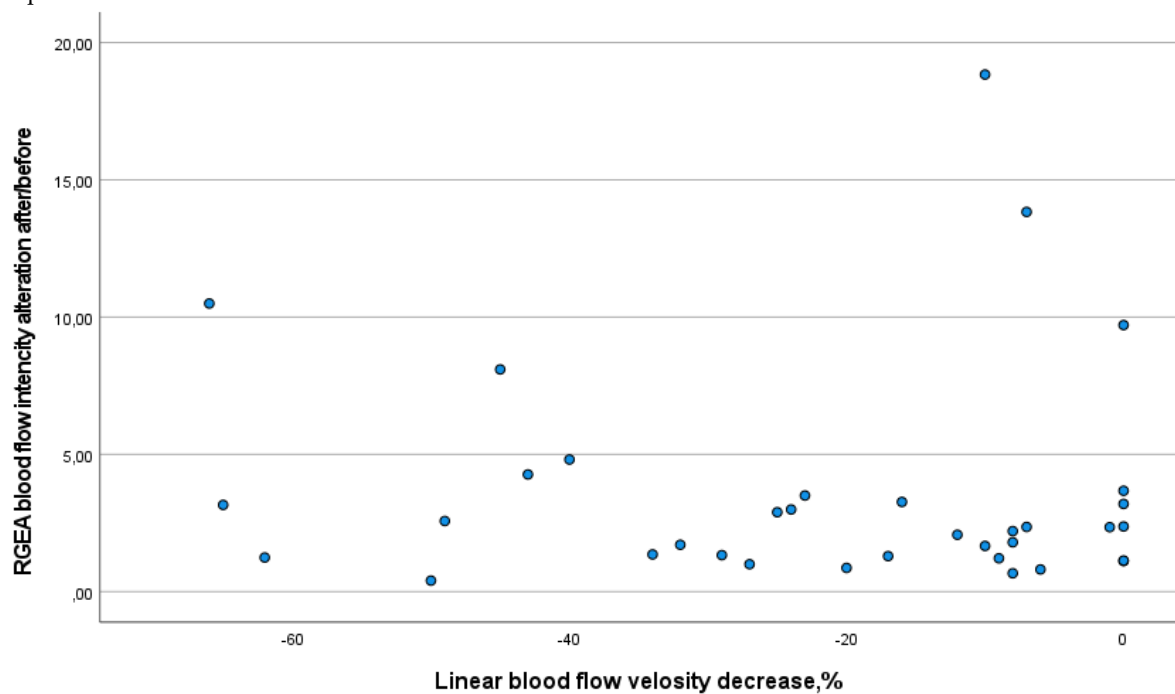

Correlations

| Correlations                           |                                        |                                                  |                                                  |                                                  |                                                   |
|----------------------------------------|----------------------------------------|--------------------------------------------------|--------------------------------------------------|--------------------------------------------------|---------------------------------------------------|
|                                        | Linear blood flow velocity decrease, % | GDA blood flow intensity alteration after/before | PDA blood flow intensity alteration after/before | PHA blood flow intensity alteration after/before | RGEA blood flow intensity alteration after/before |
| Linear blood flow velocity decrease, % | 1                                      | .195                                             | .093                                             | -.270                                            | -.025                                             |
| Pearson Correlation                    |                                        |                                                  |                                                  |                                                  |                                                   |

|              |            |      |                 |       |       |       |       |
|--------------|------------|------|-----------------|-------|-------|-------|-------|
|              |            |      | Sig. (2-tailed) | .241  | .578  | .101  | .885  |
|              |            | N    | 38              | 38    | 38    | 38    | 35    |
| GDA          | blood      | flow | Pearson         | .195  | 1     | -.042 | -.057 |
| intensity    | alteration |      | Correlation     |       |       |       |       |
| after/before |            |      | Sig. (2-tailed) | .241  | .800  | .735  | .744  |
|              |            | N    | 38              | 38    | 38    | 38    | 35    |
| PDA          | blood      | flow | Pearson         | .093  | -.042 | 1     | -.015 |
| intensity    | alteration |      | Correlation     |       |       |       |       |
| after/before |            |      | Sig. (2-tailed) | .578  | .800  | .926  | .851  |
|              |            | N    | 38              | 38    | 38    | 38    | 35    |
| PHA          | blood      | flow | Pearson         | -.270 | -.057 | -.015 | 1     |
| intensity    | alteration |      | Correlation     |       |       |       |       |
| after/before |            |      | Sig. (2-tailed) | .101  | .735  | .926  | .155  |
|              |            | N    | 38              | 38    | 38    | 38    | 35    |
| RGEA         | blood      | flow | Pearson         | -.025 | -.057 | -.033 | -.246 |
| intensity    | alteration |      | Correlation     |       |       |       |       |
| after/before |            |      | Sig. (2-tailed) | .885  | .744  | .851  | .155  |
|              |            | N    | 35              | 35    | 35    | 35    | 35    |

#### Nonparametric Correlations

|                   |                                                        |                 | Correlations                                          |                                                                     |                                                                     |                                                                     |                                                                      |
|-------------------|--------------------------------------------------------|-----------------|-------------------------------------------------------|---------------------------------------------------------------------|---------------------------------------------------------------------|---------------------------------------------------------------------|----------------------------------------------------------------------|
|                   |                                                        |                 | Linear<br>blood<br>flow<br>velocity<br>decrease.<br>% | GDA<br>blood<br>flow<br>intensity<br>alteration<br>after/befo<br>re | PDA<br>blood<br>flow<br>intensity<br>alteration<br>after/befo<br>re | PHA<br>blood<br>flow<br>intensity<br>alteration<br>after/befo<br>re | RGEA<br>blood<br>flow<br>intensity<br>alteration<br>after/befor<br>e |
| Spearman's<br>rho | Linear blood flow<br>velocity<br>decrease. %           | Correlation     | 1.000                                                 | .085                                                                | -.114                                                               | -.142                                                               | -.063                                                                |
|                   |                                                        | Coefficient     |                                                       |                                                                     |                                                                     |                                                                     |                                                                      |
|                   |                                                        | Sig. (2-tailed) | .                                                     | .613                                                                | .496                                                                | .397                                                                | .719                                                                 |
|                   |                                                        | N               | 38                                                    | 38                                                                  | 38                                                                  | 38                                                                  | 35                                                                   |
|                   | GDA blood flow<br>intensity alteration<br>after/before | Correlation     | .085                                                  | 1.000                                                               | -.246                                                               | -.109                                                               | -.057                                                                |
|                   |                                                        | Coefficient     |                                                       |                                                                     |                                                                     |                                                                     |                                                                      |
|                   |                                                        | Sig. (2-tailed) | .613                                                  | .                                                                   | .137                                                                | .515                                                                | .746                                                                 |
|                   |                                                        | N               | 38                                                    | 38                                                                  | 38                                                                  | 38                                                                  | 35                                                                   |
|                   | PDA blood flow<br>intensity alteration<br>after/before | Correlation     | -.114                                                 | -.246                                                               | 1.000                                                               | .072                                                                | .268                                                                 |
|                   |                                                        | Coefficient     |                                                       |                                                                     |                                                                     |                                                                     |                                                                      |
|                   |                                                        | Sig. (2-tailed) | .496                                                  | .137                                                                | .                                                                   | .669                                                                | .120                                                                 |
|                   |                                                        | N               | 38                                                    | 38                                                                  | 38                                                                  | 38                                                                  | 35                                                                   |
|                   |                                                        | Correlation     | -.142                                                 | -.109                                                               | .072                                                                | 1.000                                                               | -.198                                                                |
|                   |                                                        | Coefficient     |                                                       |                                                                     |                                                                     |                                                                     |                                                                      |

|                      |                 |       |       |      |       |       |
|----------------------|-----------------|-------|-------|------|-------|-------|
| PHA blood flow       | Sig. (2-tailed) | .397  | .515  | .669 | .     | .254  |
| intensity alteration | N               | 38    | 38    | 38   | 38    | 35    |
| after/before         |                 |       |       |      |       |       |
| RGEA blood flow      | Correlation     | -.063 | -.057 | .268 | -.198 | 1.000 |
| intensity alteration | Coefficient     |       |       |      |       |       |
| after/before         | Sig. (2-tailed) | .719  | .746  | .120 | .254  | .     |
|                      | N               | 35    | 35    | 35   | 35    | 35    |

Graph

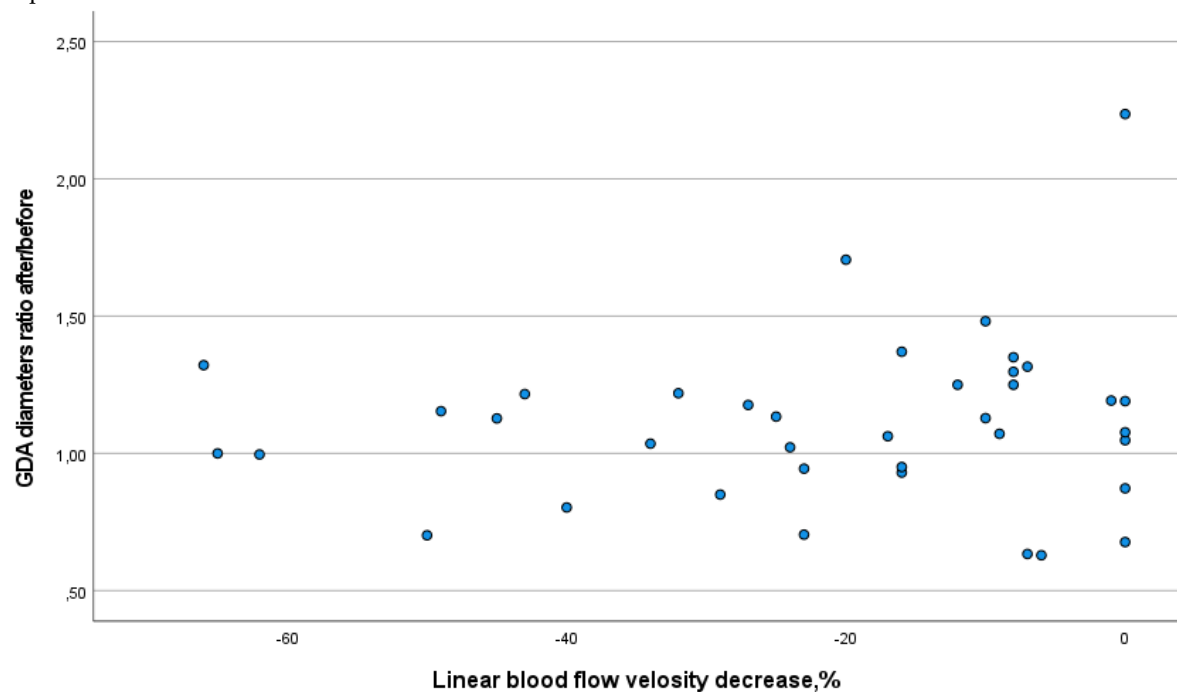

Graph

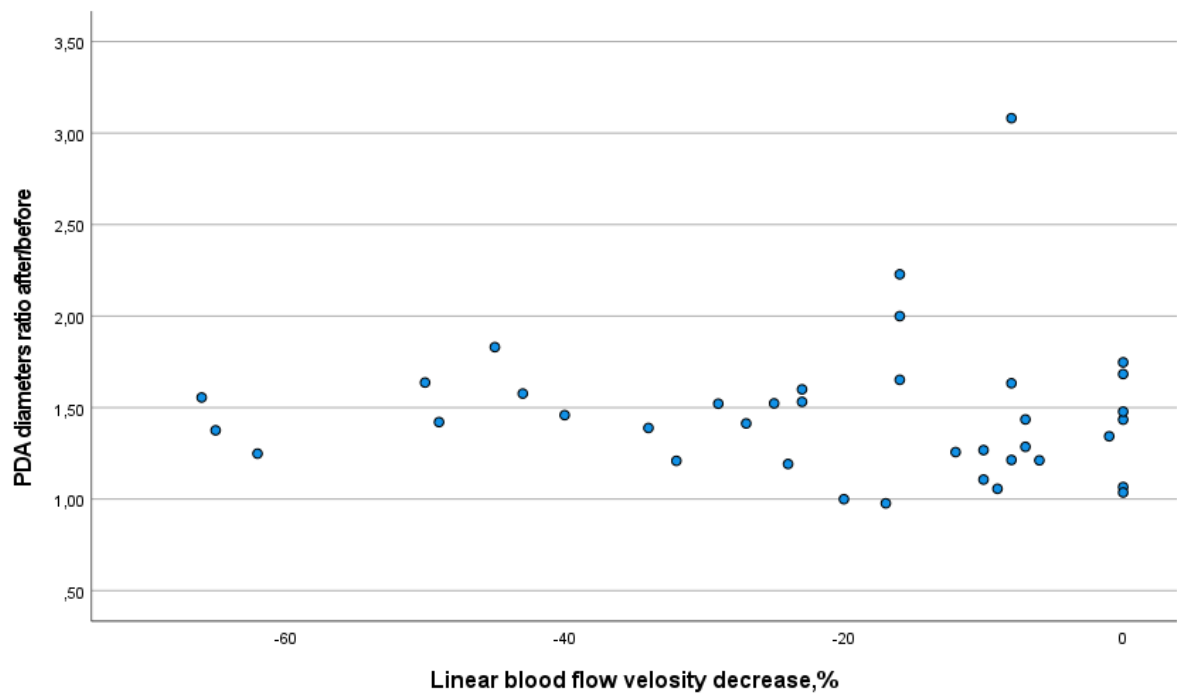

Graph

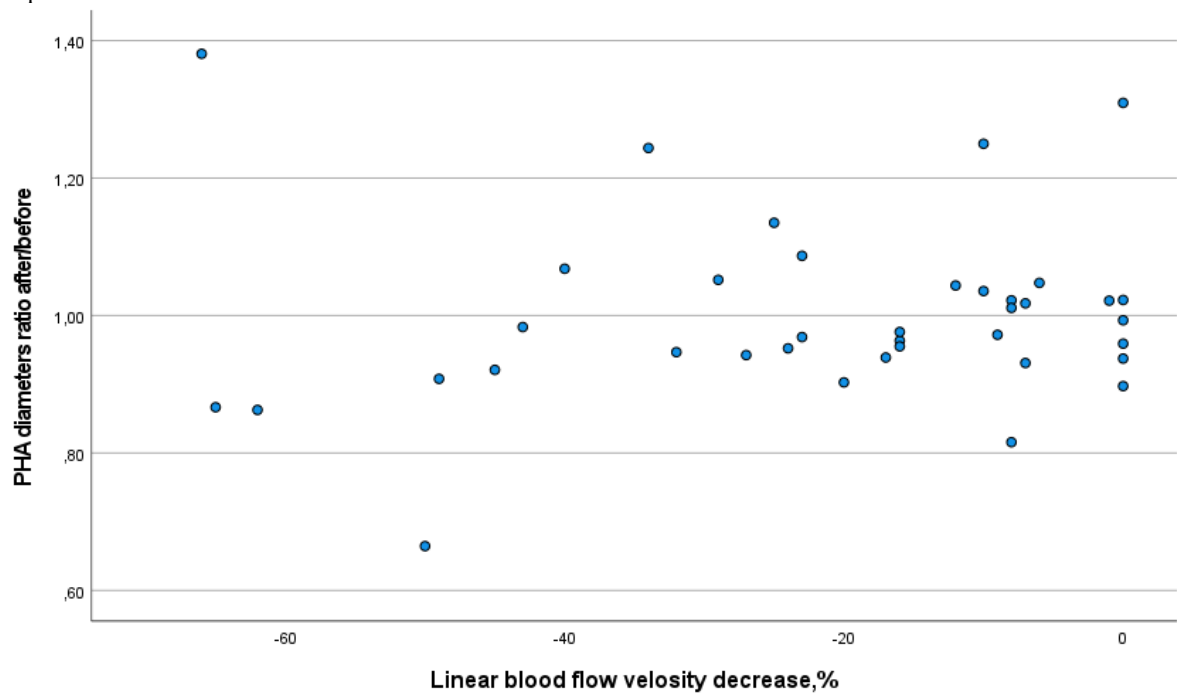

Graph



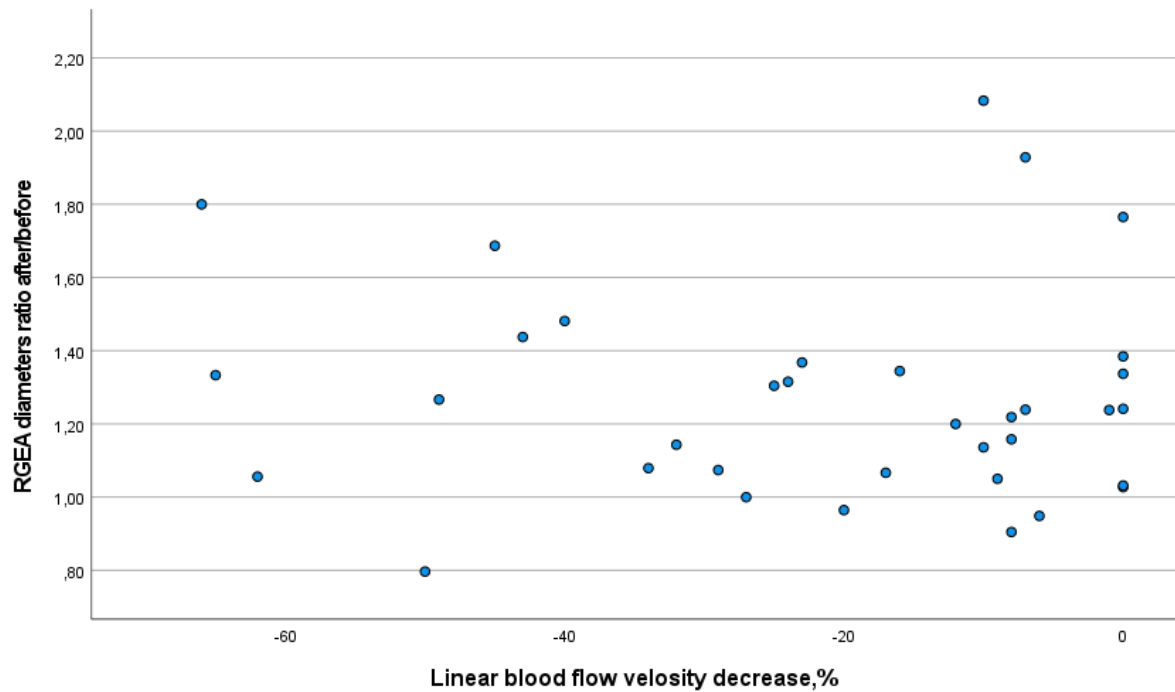

## Correlations

|                                           |                 | Correlations                                    |                                           |                                           |                                           |                                            |
|-------------------------------------------|-----------------|-------------------------------------------------|-------------------------------------------|-------------------------------------------|-------------------------------------------|--------------------------------------------|
|                                           |                 | Linear<br>blood flow<br>velocity<br>decrease. % | GDA<br>diameters<br>ratio<br>after/before | PDA<br>diameters<br>ratio<br>after/before | PHA<br>diameters<br>ratio<br>after/before | RGEA<br>diameters<br>ratio<br>after/before |
| Linear blood flow<br>velocity decrease. % | Pearson         | 1                                               | .132                                      | -.024                                     | .082                                      | -.059                                      |
|                                           | Correlation     |                                                 |                                           |                                           |                                           |                                            |
|                                           | Sig. (2-tailed) |                                                 | .428                                      | .886                                      | .624                                      | .738                                       |
|                                           | N               | 38                                              | 38                                        | 38                                        | 38                                        | 35                                         |
| GDA diameters ratio<br>after/before       | Pearson         | .132                                            | 1                                         | -.159                                     | .152                                      | -.073                                      |
|                                           | Correlation     |                                                 |                                           |                                           |                                           |                                            |
|                                           | Sig. (2-tailed) | .428                                            |                                           | .341                                      | .361                                      | .678                                       |
|                                           | N               | 38                                              | 38                                        | 38                                        | 38                                        | 35                                         |
| PDA diameters ratio<br>after/before       | Pearson         | -.024                                           | -.159                                     | 1                                         | -.107                                     | .111                                       |
|                                           | Correlation     |                                                 |                                           |                                           |                                           |                                            |
|                                           | Sig. (2-tailed) | .886                                            | .341                                      |                                           | .522                                      | .524                                       |
|                                           | N               | 38                                              | 38                                        | 38                                        | 38                                        | 35                                         |
| PHA diameters ratio<br>after/before       | Pearson         | .082                                            | .152                                      | -.107                                     | 1                                         | .403                                       |
|                                           | Correlation     |                                                 |                                           |                                           |                                           |                                            |
|                                           | Sig. (2-tailed) | .624                                            | .361                                      | .522                                      |                                           | .016                                       |
|                                           | N               | 38                                              | 38                                        | 38                                        | 38                                        | 35                                         |
| RGEA diameters ratio<br>after/before      | Pearson         | -.059                                           | -.073                                     | .111                                      | .403                                      | 1                                          |
|                                           | Correlation     |                                                 |                                           |                                           |                                           |                                            |
|                                           | Sig. (2-tailed) | .738                                            | .678                                      | .524                                      | .016                                      |                                            |

|   |    |    |    |    |    |
|---|----|----|----|----|----|
| N | 35 | 35 | 35 | 35 | 35 |
|---|----|----|----|----|----|

# Nonparametric Correlations

|                   |                                              |                 | Correlations                                          |                                               |                                               |                                               |                                                |
|-------------------|----------------------------------------------|-----------------|-------------------------------------------------------|-----------------------------------------------|-----------------------------------------------|-----------------------------------------------|------------------------------------------------|
|                   |                                              |                 | Linear<br>blood<br>flow<br>velocity<br>decrease.<br>% | GDA<br>diameters<br>ratio<br>after/befo<br>re | PDA<br>diameters<br>ratio<br>after/befo<br>re | PHA<br>diameters<br>ratio<br>after/befo<br>re | RGEA<br>diameters<br>ratio<br>after/befor<br>e |
| Spearman's<br>rho | Linear blood flow<br>velocity<br>decrease. % | Correlation     | 1.000                                                 | .085                                          | -.114                                         | .142                                          | -.063                                          |
|                   |                                              | Coefficient     |                                                       |                                               |                                               |                                               |                                                |
|                   |                                              | Sig. (2-tailed) | .                                                     | .611                                          | .496                                          | .397                                          | .719                                           |
|                   |                                              | N               | 38                                                    | 38                                            | 38                                            | 38                                            | 35                                             |
|                   | GDA diameters<br>ratio after/before          | Correlation     | .085                                                  | 1.000                                         | -.244                                         | .106                                          | -.059                                          |
|                   |                                              | Coefficient     |                                                       |                                               |                                               |                                               |                                                |
|                   |                                              | Sig. (2-tailed) | .611                                                  | .                                             | .140                                          | .527                                          | .737                                           |
|                   |                                              | N               | 38                                                    | 38                                            | 38                                            | 38                                            | 35                                             |
|                   | PDA diameters<br>ratio after/before          | Correlation     | -.114                                                 | -.244                                         | 1.000                                         | -.072                                         | .268                                           |
|                   |                                              | Coefficient     |                                                       |                                               |                                               |                                               |                                                |
|                   |                                              | Sig. (2-tailed) | .496                                                  | .140                                          | .                                             | .669                                          | .120                                           |
|                   |                                              | N               | 38                                                    | 38                                            | 38                                            | 38                                            | 35                                             |
|                   | PHA diameters<br>ratio after/before          | Correlation     | .142                                                  | .106                                          | -.072                                         | 1.000                                         | .198                                           |
|                   |                                              | Coefficient     |                                                       |                                               |                                               |                                               |                                                |
|                   |                                              | Sig. (2-tailed) | .397                                                  | .527                                          | .669                                          | .                                             | .254                                           |
|                   |                                              | N               | 38                                                    | 38                                            | 38                                            | 38                                            | 35                                             |
|                   | RGEA diameters<br>ratio after/before         | Correlation     | -.063                                                 | -.059                                         | .268                                          | .198                                          | 1.000                                          |
|                   |                                              | Coefficient     |                                                       |                                               |                                               |                                               |                                                |
|                   |                                              | Sig. (2-tailed) | .719                                                  | .737                                          | .120                                          | .254                                          | .                                              |
|                   |                                              | N               | 35                                                    | 35                                            | 35                                            | 35                                            | 35                                             |

## Graph

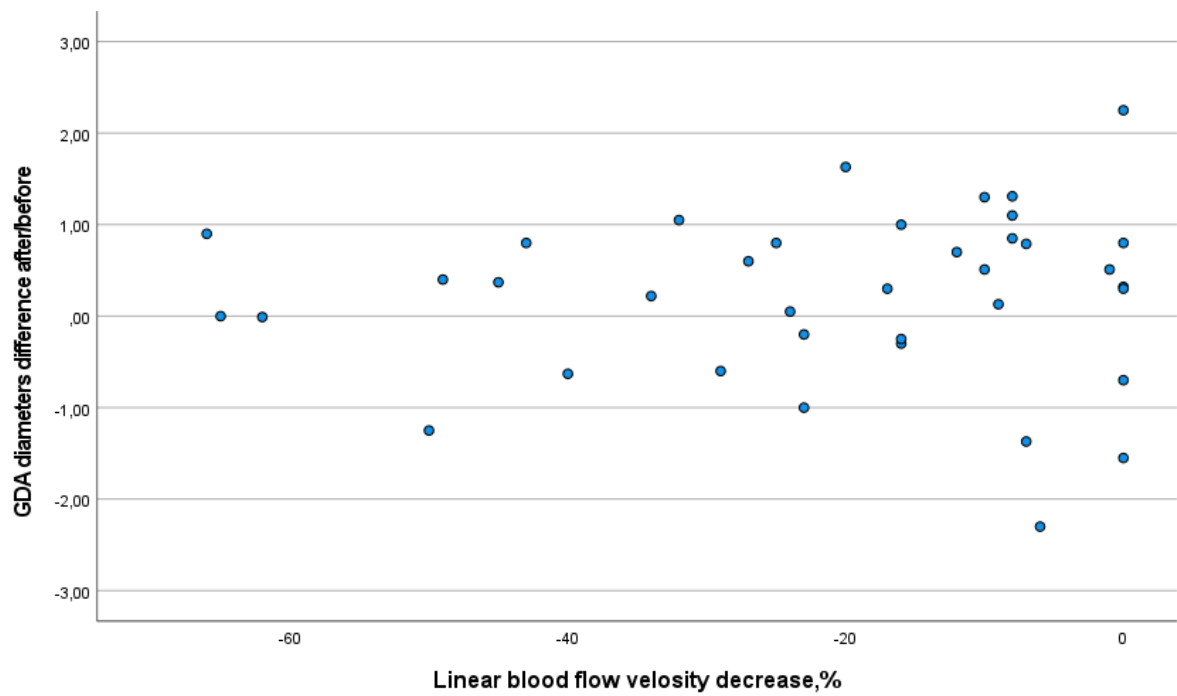

Graph

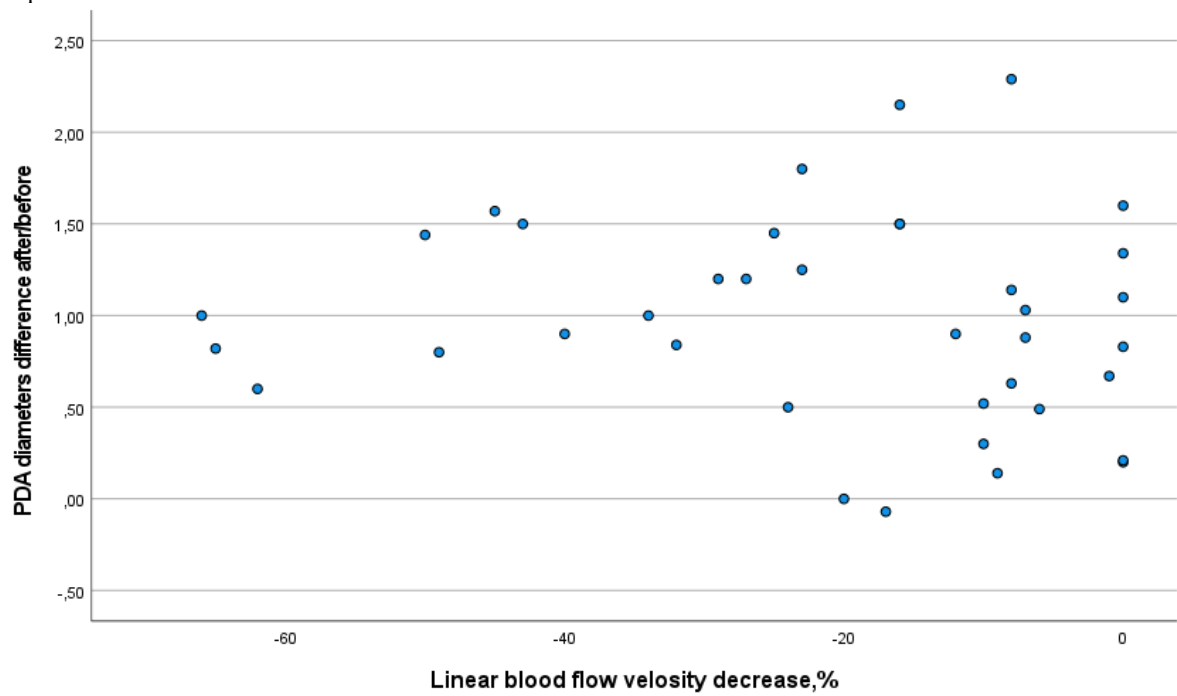

Graph

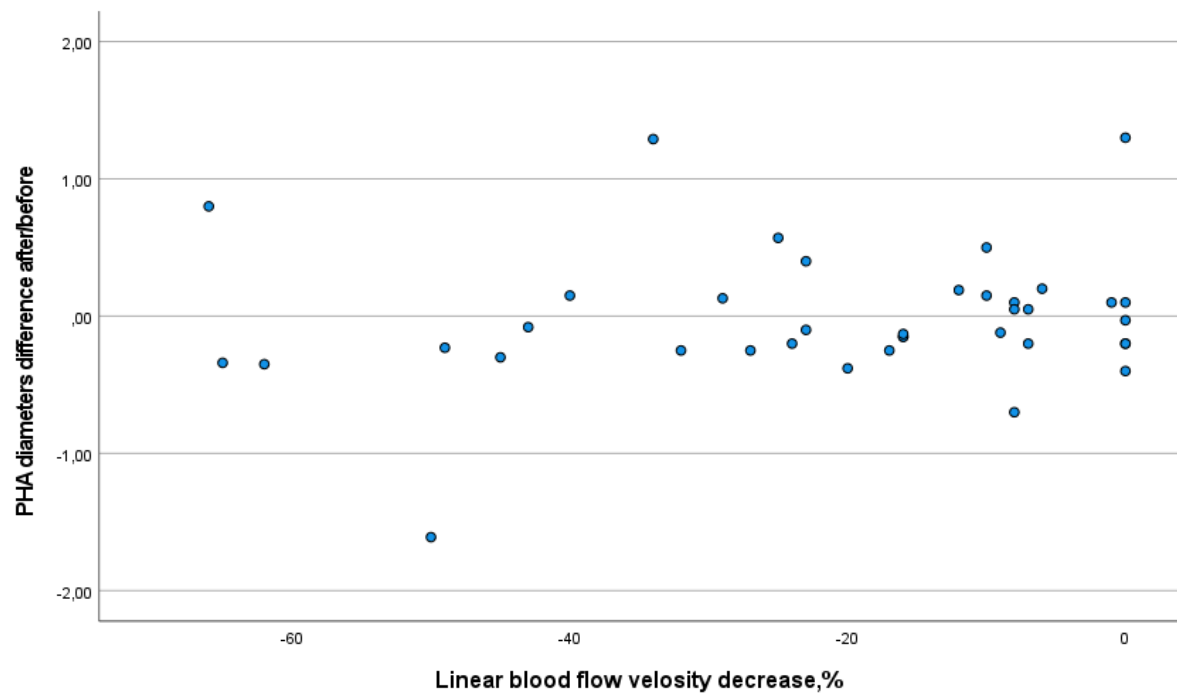

Graph

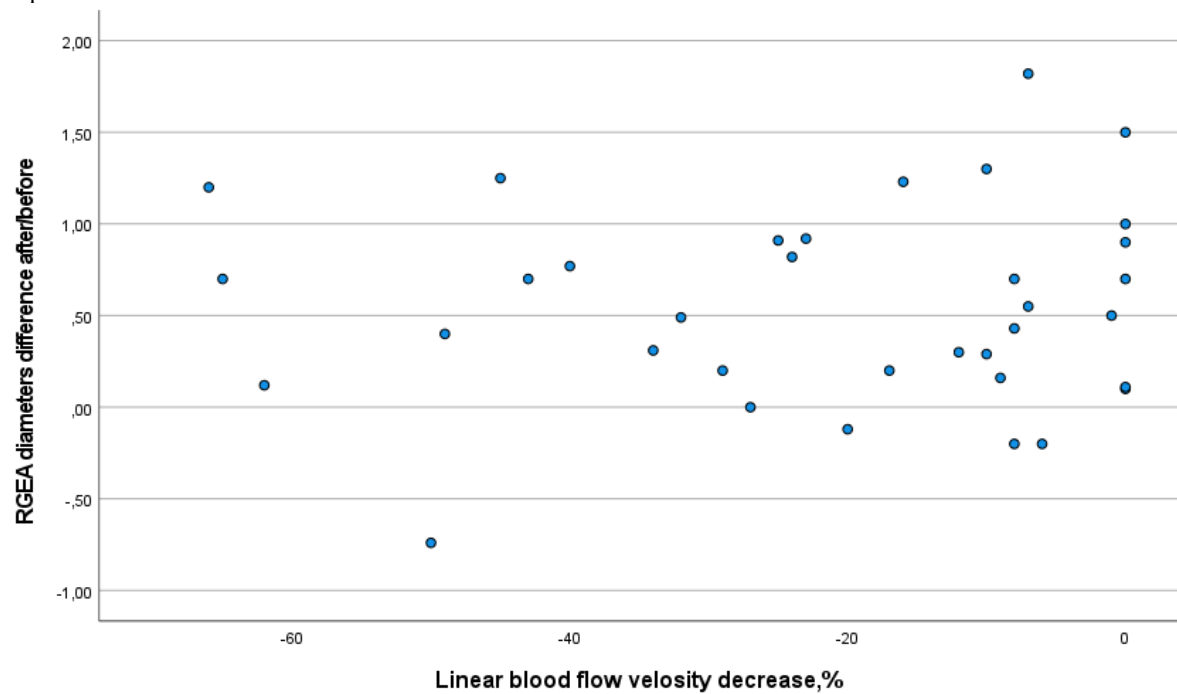

Correlations

|          |            |      |             | Correlations |              |              |              |              |
|----------|------------|------|-------------|--------------|--------------|--------------|--------------|--------------|
|          |            |      |             | Linear       | GDA          | PDA          | PHA          | RGEA         |
|          |            |      |             | blood flow   | diameters    | diameters    | diameters    | diameters    |
|          |            |      |             | velocity     | difference   | difference   | difference   | difference   |
|          |            |      |             | decrease.%   | after/before | after/before | after/before | after/before |
| Linear   | blood      | flow | Pearson     | 1            | .047         | -.112        | .136         | .063         |
| velocity | decrease.% |      | Correlation |              |              |              |              |              |

|              |           |                 |       |       |       |       |       |
|--------------|-----------|-----------------|-------|-------|-------|-------|-------|
|              |           | Sig. (2-tailed) |       | .780  | .505  | .416  | .721  |
|              |           | N               | 38    | 38    | 38    | 38    | 35    |
| GDA          | diameters | Pearson         | .047  | 1     | -.187 | .176  | -.055 |
| difference   |           | Correlation     |       |       |       |       |       |
| after/before |           | Sig. (2-tailed) | .780  |       | .261  | .290  | .752  |
|              |           | N               | 38    | 38    | 38    | 38    | 35    |
| PDA          | diameters | Pearson         | -.112 | -.187 | 1     | -.126 | .241  |
| difference   |           | Correlation     |       |       |       |       |       |
| after/before |           | Sig. (2-tailed) | .505  | .261  |       | .450  | .163  |
|              |           | N               | 38    | 38    | 38    | 38    | 35    |
| PHA          | diameters | Pearson         | .136  | .176  | -.126 | 1     | .349  |
| difference   |           | Correlation     |       |       |       |       |       |
| after/before |           | Sig. (2-tailed) | .416  | .290  | .450  |       | .040  |
|              |           | N               | 38    | 38    | 38    | 38    | 35    |
| RGEA         | diameters | Pearson         | .063  | -.055 | .241  | .349  | 1     |
| difference   |           | Correlation     |       |       |       |       |       |
| after/before |           | Sig. (2-tailed) | .721  | .752  | .163  | .040  |       |
|              |           | N               | 35    | 35    | 35    | 35    | 35    |

#### Nonparametric Correlations

|                |                   | Correlations    |       |            |            |            |            |
|----------------|-------------------|-----------------|-------|------------|------------|------------|------------|
|                |                   | Linear          |       |            |            |            |            |
|                |                   | blood           |       | GDA        | PDA        | PHA        | RGEA       |
|                |                   | flow            |       | diameters  | diameters  | diameters  | diameters  |
|                |                   | velocity        |       | difference | difference | difference | difference |
|                |                   | decrease.       |       | after/befo | after/befo | after/befo | after/befo |
|                |                   | %               |       | re         | re         | re         | e          |
| Spearman's rho | Linear blood flow | Correlation     | 1.000 | .060       | -.142      | .160       | .046       |
|                | velocity          | Coefficient     |       |            |            |            |            |
|                | decrease.%        | Sig. (2-tailed) | .     | .721       | .395       | .338       | .791       |
|                |                   | N               | 38    | 38         | 38         | 38         | 35         |
|                | GDA diameters     | Correlation     | .060  | 1.000      | -.166      | .057       | -.095      |
|                | difference        | Coefficient     |       |            |            |            |            |
|                | after/before      | Sig. (2-tailed) | .721  | .          | .318       | .732       | .587       |
|                |                   | N               | 38    | 38         | 38         | 38         | 35         |
|                | PDA diameters     | Correlation     | -.142 | -.166      | 1.000      | -.002      | .255       |
|                | difference        | Coefficient     |       |            |            |            |            |
|                | after/before      | Sig. (2-tailed) | .395  | .318       | .          | .990       | .139       |
|                |                   | N               | 38    | 38         | 38         | 38         | 35         |
|                | PHA diameters     | Correlation     | .160  | .057       | -.002      | 1.000      | .235       |
|                | difference        | Coefficient     |       |            |            |            |            |
|                | after/before      | Sig. (2-tailed) | .338  | .732       | .990       | .          | .174       |

|                                        |                         |      |       |      |      |       |
|----------------------------------------|-------------------------|------|-------|------|------|-------|
|                                        | N                       | 38   | 38    | 38   | 38   | 35    |
| RGEA diameters difference after/before | Correlation Coefficient | .046 | -.095 | .255 | .235 | 1.000 |
|                                        | Sig. (2-tailed)         | .791 | .587  | .139 | .174 | .     |
|                                        | N                       | 35   | 35    | 35   | 35   | 35    |

T-Test

| Group Statistics                                  |                   |    |        |                |                 |
|---------------------------------------------------|-------------------|----|--------|----------------|-----------------|
|                                                   | Puls preservation | N  | Mean   | Std. Deviation | Std. Error Mean |
| GDA blood flow intensity alteration after/before  | no                | 4  | 1.5601 | .99783         | .49891          |
|                                                   | yes               | 34 | 2.4687 | 4.29446        | .73649          |
| PDA blood flow intensity alteration after/before  | no                | 4  | 5.3010 | 3.03835        | 1.51918         |
|                                                   | yes               | 34 | 7.5634 | 15.33233       | 2.62947         |
| PHA blood flow intensity alteration after/before  | no                | 4  | 1.1916 | .73733         | .36866          |
|                                                   | yes               | 34 | 1.1842 | .78858         | .13524          |
| RGEA blood flow intensity alteration after/before | no                | 4  | 4.0041 | 4.42891        | 2.21446         |
|                                                   | yes               | 31 | 3.4930 | 4.02407        | .72274          |
| GDA diameters ratio after/before                  | no                | 4  | 1.0914 | .15515         | .07757          |
|                                                   | yes               | 34 | 1.1106 | .31842         | .05461          |
| PDA diameters ratio after/before                  | no                | 4  | 1.4821 | .21718         | .10859          |
|                                                   | yes               | 34 | 1.4635 | .40070         | .06872          |
| PHA diameters ratio after/before                  | no                | 4  | 1.0333 | .24347         | .12173          |
|                                                   | yes               | 34 | .9964  | .11895         | .02040          |
| RGEA diameters ratio after/before                 | no                | 4  | 1.3042 | .35815         | .17907          |
|                                                   | yes               | 31 | 1.2644 | .29022         | .05212          |
| GDA diameters difference after/before             | no                | 4  | .3025  | .42680         | .21340          |
|                                                   | yes               | 34 | .2241  | .97675         | .16751          |
| PDA diameters difference after/before             | no                | 4  | 1.0050 | .42907         | .21453          |
|                                                   | yes               | 34 | .9765  | .58052         | .09956          |
| PHA diameters difference after/before             | no                | 4  | .0525  | .54070         | .27035          |
|                                                   | yes               | 34 | -.0221 | .49866         | .08552          |
| RGEA diameters difference after/before            | no                | 4  | .5300  | .52624         | .26312          |
|                                                   | yes               | 31 | .5548  | .55292         | .09931          |

### Independent Samples Test

| Levene's Test for Equality of Variances |      | t-test for Equality of Means |    |                 |                 |            |                                           |  |
|-----------------------------------------|------|------------------------------|----|-----------------|-----------------|------------|-------------------------------------------|--|
| F                                       | Sig. | t                            | df | Sig. (2-tailed) | Mean Difference | Std. Error | 95% Confidence Interval of the Difference |  |

|                                   |                 |                             |       |      |         |        |      |           | Difference | Lower      | Upper    |
|-----------------------------------|-----------------|-----------------------------|-------|------|---------|--------|------|-----------|------------|------------|----------|
| GDA flow alteration after/before  | blood intensity | Equal variances assumed     | .414  | .524 | -.417   | 36     | .679 | -.90868   | 2.17871    | - 5.32731  | 3.50996  |
|                                   |                 | Equal variances not assumed |       |      | - 1.021 | 21.178 | .319 | -.90868   | .88957     | - 2.75770  | .94034   |
| PDA flow alteration after/before  | blood intensity | Equal variances assumed     | .382  | .540 | -.291   | 36     | .773 | - 2.26241 | 7.77338    | - 18.02756 | 13.50275 |
|                                   |                 | Equal variances not assumed |       |      | -.745   | 26.378 | .463 | - 2.26241 | 3.03678    | - 8.50024  | 3.97543  |
| PHA flow alteration after/before  | blood intensity | Equal variances assumed     | .338  | .565 | .018    | 36     | .986 | .00746    | .41465     | -.83348    | .84841   |
|                                   |                 | Equal variances not assumed |       |      | .019    | 3.855  | .986 | .00746    | .39269     | - 1.09912  | 1.11405  |
| RGEA flow alteration after/before | blood intensity | Equal variances assumed     | .210  | .650 | .237    | 33     | .814 | .51109    | 2.15835    | - 3.88010  | 4.90228  |
|                                   |                 | Equal variances not assumed |       |      | .219    | 3.669  | .838 | .51109    | 2.32942    | - 6.19314  | 7.21532  |
| GDA diameters ratio after/before  |                 | Equal variances assumed     | .918  | .345 | -.118   | 36     | .907 | -.01922   | .16288     | -.34956    | .31111   |
|                                   |                 | Equal variances not assumed |       |      | -.203   | 6.563  | .846 | -.01922   | .09487     | -.24661    | .20816   |
| PDA diameters ratio after/before  |                 | Equal variances assumed     | .390  | .536 | .090    | 36     | .929 | .01854    | .20548     | -.39819    | .43528   |
|                                   |                 | Equal variances not assumed |       |      | .144    | 5.800  | .890 | .01854    | .12851     | -.29855    | .33564   |
| PHA diameters                     |                 | Equal variances assumed     | 3.679 | .063 | .522    | 36     | .605 | .03692    | .07074     | -.10655    | .18038   |

|                                                 |                                   |       |      |       |           |      |         |        |         |         |
|-------------------------------------------------|-----------------------------------|-------|------|-------|-----------|------|---------|--------|---------|---------|
| ratio<br>after/before                           | Equal<br>variances not<br>assumed |       |      | .299  | 3.17<br>1 | .783 | .03692  | .12343 | -.34420 | .41804  |
| RGEA<br>diameters<br>ratio<br>after/before      | Equal<br>variances<br>assumed     | .248  | .622 | .253  | 33        | .802 | .03986  | .15781 | -.28120 | .36093  |
|                                                 | Equal<br>variances not<br>assumed |       |      | .214  | 3.52<br>7 | .843 | .03986  | .18651 | -.50651 | .58623  |
| GDA<br>diameters<br>difference<br>after/before  | Equal<br>variances<br>assumed     | 2.160 | .150 | .157  | 36        | .876 | .07838  | .49859 | -.93281 | 1.08958 |
|                                                 | Equal<br>variances not<br>assumed |       |      | .289  | 7.57<br>5 | .780 | .07838  | .27129 | -.55339 | .71015  |
| PDA<br>diameters<br>difference<br>after/before  | Equal<br>variances<br>assumed     | .864  | .359 | .095  | 36        | .925 | .02853  | .30100 | -.58193 | .63899  |
|                                                 | Equal<br>variances not<br>assumed |       |      | .121  | 4.41<br>3 | .909 | .02853  | .23651 | -.60460 | .66166  |
| PHA<br>diameters<br>difference<br>after/before  | Equal<br>variances<br>assumed     | .146  | .704 | .281  | 36        | .780 | .07456  | .26551 | -.46393 | .61305  |
|                                                 | Equal<br>variances not<br>assumed |       |      | .263  | 3.62<br>7 | .807 | .07456  | .28355 | -.74568 | .89480  |
| RGEA<br>diameters<br>difference<br>after/before | Equal<br>variances<br>assumed     | .008  | .928 | -.085 | 33        | .933 | -.02484 | .29250 | -.61993 | .57025  |
|                                                 | Equal<br>variances not<br>assumed |       |      | -.088 | 3.90<br>8 | .934 | -.02484 | .28124 | -.81302 | .76334  |

NPar Tests

Mann-Whitney Test

| Ranks                    |                   |    |           |              |
|--------------------------|-------------------|----|-----------|--------------|
|                          | Puls preservation | N  | Mean Rank | Sum of Ranks |
| GDA blood flow intensity | no                | 4  | 18.50     | 74.00        |
| alteration after/before  | yes               | 34 | 19.62     | 667.00       |
|                          | Total             | 38 |           |              |
| PDA blood flow intensity | no                | 4  | 22.00     | 88.00        |
| alteration after/before  | yes               | 34 | 19.21     | 653.00       |



|                           |       |    |       |        |
|---------------------------|-------|----|-------|--------|
|                           | Total | 38 |       |        |
| PHA blood flow intensity  | no    | 4  | 21.00 | 84.00  |
| alteration after/before   | yes   | 34 | 19.32 | 657.00 |
|                           | Total | 38 |       |        |
| RGEA blood flow intensity | no    | 4  | 18.00 | 72.00  |
| alteration after/before   | yes   | 31 | 18.00 | 558.00 |
|                           | Total | 35 |       |        |
| GDA diameters ratio       | no    | 4  | 18.50 | 74.00  |
| after/before              | yes   | 34 | 19.62 | 667.00 |
|                           | Total | 38 |       |        |
| PDA diameters ratio       | no    | 4  | 22.00 | 88.00  |
| after/before              | yes   | 34 | 19.21 | 653.00 |
|                           | Total | 38 |       |        |
| PHA diameters ratio       | no    | 4  | 18.00 | 72.00  |
| after/before              | yes   | 34 | 19.68 | 669.00 |
|                           | Total | 38 |       |        |
| RGEA diameters ratio      | no    | 4  | 18.00 | 72.00  |
| after/before              | yes   | 31 | 18.00 | 558.00 |
|                           | Total | 35 |       |        |
| GDA diameters difference  | no    | 4  | 18.75 | 75.00  |
| after/before              | yes   | 34 | 19.59 | 666.00 |
|                           | Total | 38 |       |        |
| PDA diameters difference  | no    | 4  | 19.88 | 79.50  |
| after/before              | yes   | 34 | 19.46 | 661.50 |
|                           | Total | 38 |       |        |
| PHA diameters difference  | no    | 4  | 18.25 | 73.00  |
| after/before              | yes   | 34 | 19.65 | 668.00 |
|                           | Total | 38 |       |        |
| RGEA diameters difference | no    | 4  | 16.38 | 65.50  |
| after/before              | yes   | 31 | 18.21 | 564.50 |
|                           | Total | 35 |       |        |

|                                                     | Test Statistics   |            |       |                            |                                    |
|-----------------------------------------------------|-------------------|------------|-------|----------------------------|------------------------------------|
|                                                     | Mann-Whitney<br>U | Wilcoxon W | Z     | Asymp. Sig. (2-<br>tailed) | Exact Sig. [2*(1-<br>tailed Sig.)] |
| GDA blood flow intensity<br>alteration after/before | 64.000            | 74.000     | -.190 | .849                       | .873                               |
| PDA blood flow intensity<br>alteration after/before | 58.000            | 653.000    | -.476 | .634                       | .663                               |
| PHA blood flow intensity<br>alteration after/before | 62.000            | 657.000    | -.285 | .775                       | .801                               |

|                                                   |  |  |        |         |       |       |       |
|---------------------------------------------------|--|--|--------|---------|-------|-------|-------|
| RGEA blood flow intensity alteration after/before |  |  | 62.000 | 558.000 | .000  | 1.000 | 1.000 |
| GDA diameters ratio after/before                  |  |  | 64.000 | 74.000  | -.190 | .849  | .873  |
| PDA diameters ratio after/before                  |  |  | 58.000 | 653.000 | -.476 | .634  | .663  |
| PHA diameters ratio after/before                  |  |  | 62.000 | 72.000  | -.285 | .775  | .801  |
| RGEA diameters ratio after/before                 |  |  | 62.000 | 558.000 | .000  | 1.000 | 1.000 |
| GDA diameters difference after/before             |  |  | 65.000 | 75.000  | -.143 | .886  | .909  |
| PDA diameters difference after/before             |  |  | 66.500 | 661.500 | -.071 | .943  | .945  |
| PHA diameters difference after/before             |  |  | 63.000 | 73.000  | -.238 | .812  | .836  |
| RGEA diameters difference after/before            |  |  | 55.500 | 65.500  | -.337 | .736  | .745  |

Graph

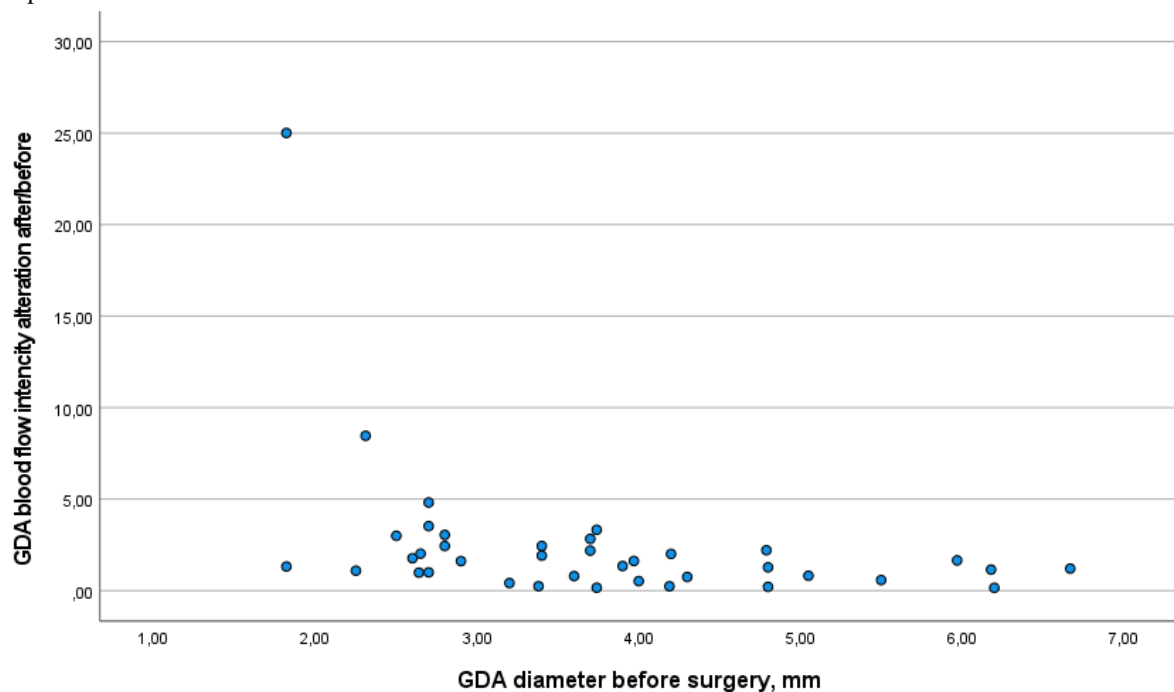

Graph

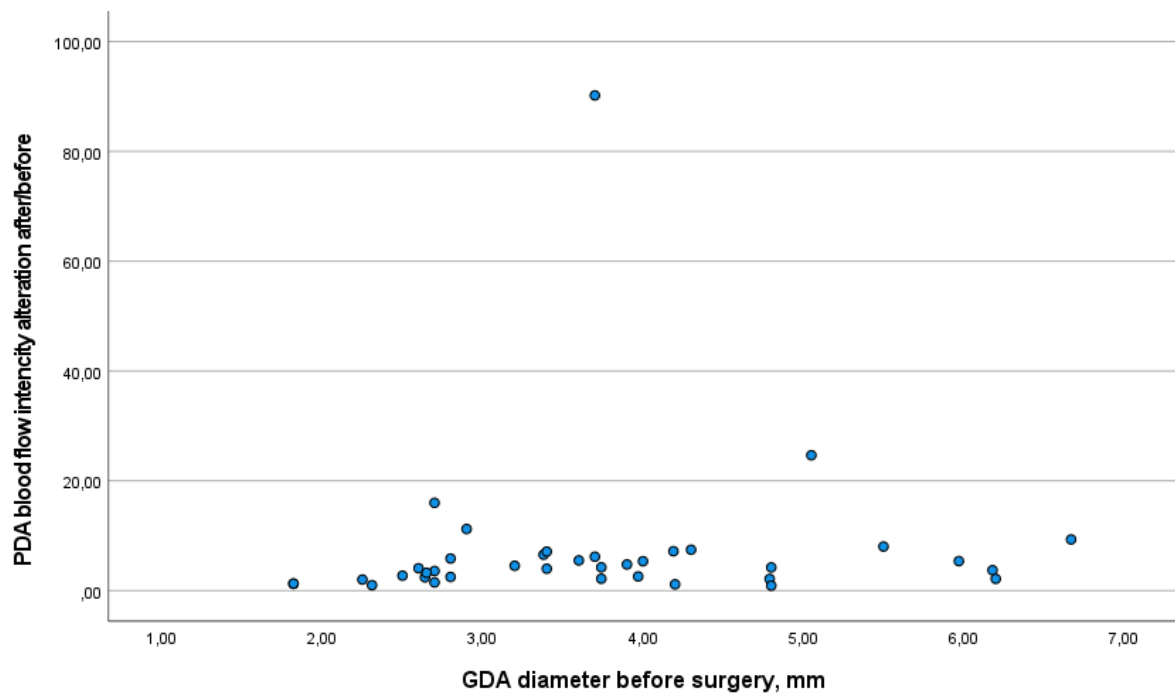

Graph

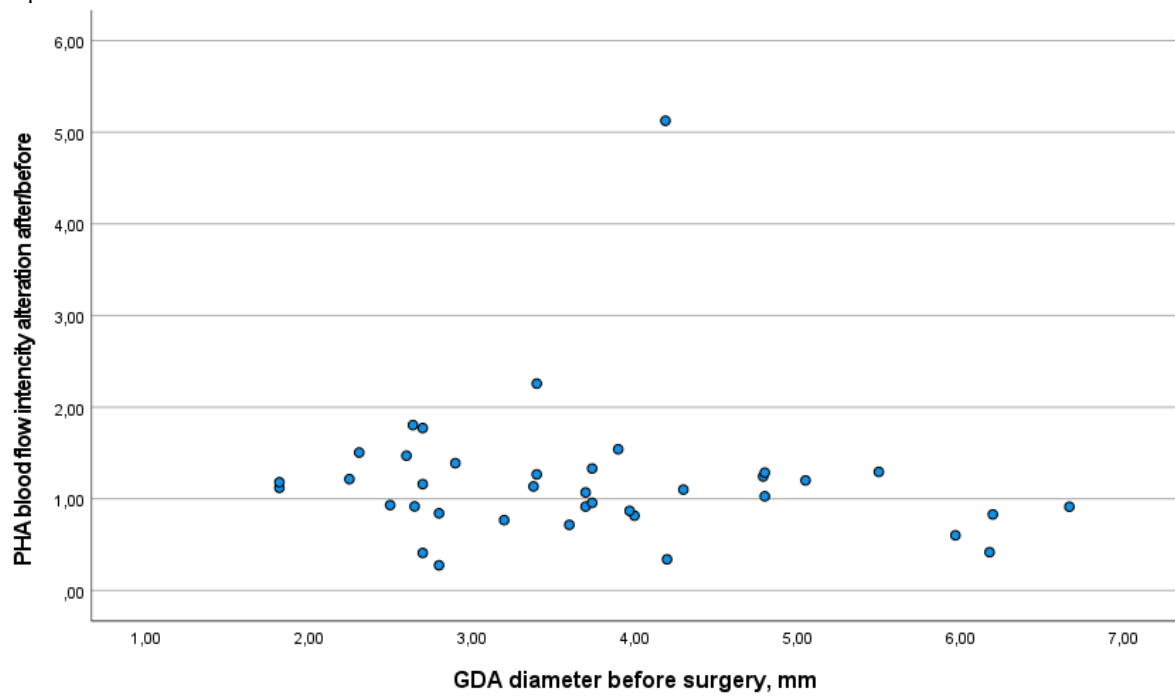

Graph

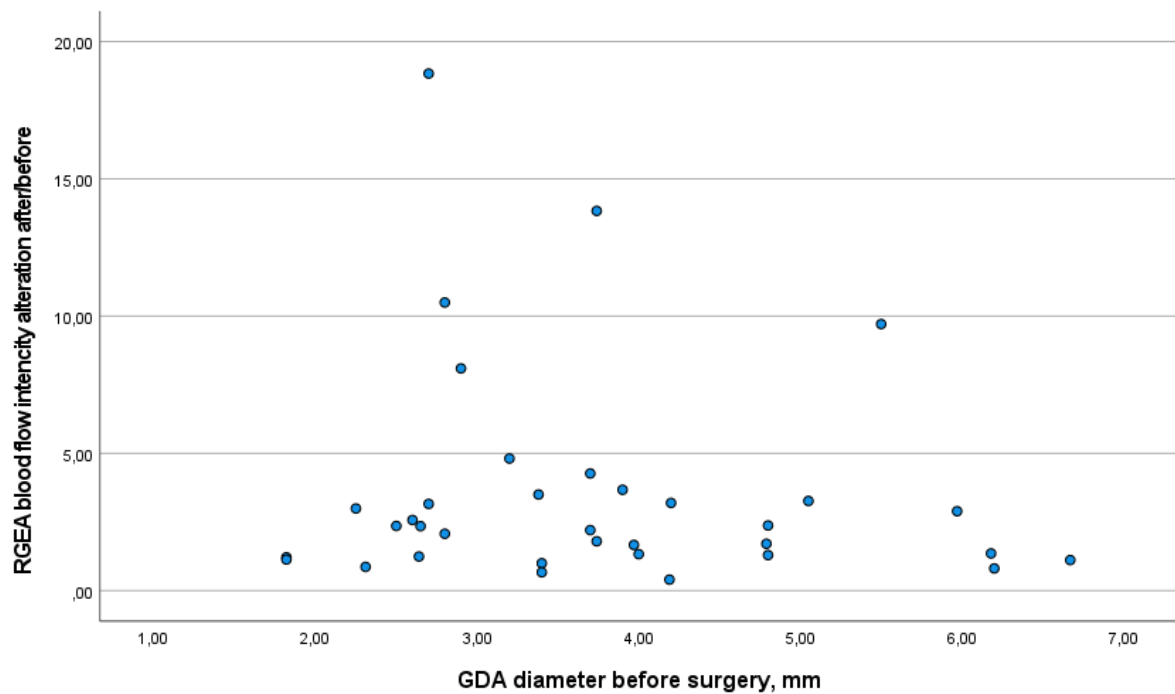

#### Correlations

|                                                  |                 | Correlations                    |                                                  |                                                  |                                                  |                                                   |
|--------------------------------------------------|-----------------|---------------------------------|--------------------------------------------------|--------------------------------------------------|--------------------------------------------------|---------------------------------------------------|
|                                                  |                 | GDA diameter before surgery. mm | GDA blood flow intensity alteration after/before | PDA blood flow intensity alteration after/before | PHA blood flow intensity alteration after/before | RGEA blood flow intensity alteration after/before |
| GDA diameter before surgery. mm                  | Pearson         | 1                               | -.381                                            | .069                                             | -.084                                            | -.122                                             |
|                                                  | Correlation     |                                 |                                                  |                                                  |                                                  |                                                   |
|                                                  | Sig. (2-tailed) |                                 | .018                                             | .679                                             | .616                                             | .486                                              |
|                                                  | N               | 38                              | 38                                               | 38                                               | 38                                               | 35                                                |
| GDA blood flow intensity alteration after/before | Pearson         | -.381                           | 1                                                | -.042                                            | -.057                                            | -.057                                             |
|                                                  | Correlation     |                                 |                                                  |                                                  |                                                  |                                                   |
|                                                  | Sig. (2-tailed) | .018                            |                                                  | .800                                             | .735                                             | .744                                              |
|                                                  | N               | 38                              | 38                                               | 38                                               | 38                                               | 35                                                |
| PDA blood flow intensity alteration after/before | Pearson         | .069                            | -.042                                            | 1                                                | -.015                                            | -.033                                             |
|                                                  | Correlation     |                                 |                                                  |                                                  |                                                  |                                                   |
|                                                  | Sig. (2-tailed) | .679                            | .800                                             |                                                  | .926                                             | .851                                              |
|                                                  | N               | 38                              | 38                                               | 38                                               | 38                                               | 35                                                |
| PHA blood flow intensity alteration after/before | Pearson         | -.084                           | -.057                                            | -.015                                            | 1                                                | -.246                                             |
|                                                  | Correlation     |                                 |                                                  |                                                  |                                                  |                                                   |
|                                                  | Sig. (2-tailed) | .616                            | .735                                             | .926                                             |                                                  | .155                                              |
|                                                  | N               | 38                              | 38                                               | 38                                               | 38                                               | 35                                                |
| Pearson                                          |                 | -.122                           | -.057                                            | -.033                                            | -.246                                            | 1                                                 |
| Correlation                                      |                 |                                 |                                                  |                                                  |                                                  |                                                   |

|              |            |      |                 |      |      |      |      |    |
|--------------|------------|------|-----------------|------|------|------|------|----|
| RGEA         | blood      | flow | Sig. (2-tailed) | .486 | .744 | .851 | .155 |    |
| intensity    | alteration | N    |                 | 35   | 35   | 35   | 35   | 35 |
| after/before |            |      |                 |      |      |      |      |    |

#### Nonparametric Correlations

|                   |                                                 |                          |                 | Correlations                                |                                                                     |                                                                     |                                                                     |                                                                      |
|-------------------|-------------------------------------------------|--------------------------|-----------------|---------------------------------------------|---------------------------------------------------------------------|---------------------------------------------------------------------|---------------------------------------------------------------------|----------------------------------------------------------------------|
|                   |                                                 |                          |                 | GDA<br>diameter<br>before<br>surgery.<br>mm | GDA<br>blood<br>flow<br>intensity<br>alteration<br>after/befo<br>re | PDA<br>blood<br>flow<br>intensity<br>alteration<br>after/befo<br>re | PHA<br>blood<br>flow<br>intensity<br>alteration<br>after/befo<br>re | RGEA<br>blood<br>flow<br>intensity<br>alteration<br>after/befor<br>e |
| Spearman's<br>rho | GDA<br>before<br>mm                             | diameter<br>surgery.     | Correlation     | 1.000                                       | -.460                                                               | .310                                                                | -.222                                                               | -.059                                                                |
|                   |                                                 |                          | Coefficient     |                                             |                                                                     |                                                                     |                                                                     |                                                                      |
|                   |                                                 |                          | Sig. (2-tailed) | .                                           | .004                                                                | .058                                                                | .180                                                                | .736                                                                 |
|                   |                                                 |                          | N               | 38                                          | 38                                                                  | 38                                                                  | 38                                                                  | 35                                                                   |
|                   | GDA<br>intensity<br>alteration<br>after/before  | blood flow<br>alteration | Correlation     | -.460                                       | 1.000                                                               | -.246                                                               | -.109                                                               | -.057                                                                |
|                   |                                                 |                          | Coefficient     |                                             |                                                                     |                                                                     |                                                                     |                                                                      |
|                   |                                                 |                          | Sig. (2-tailed) | .004                                        | .                                                                   | .137                                                                | .515                                                                | .746                                                                 |
|                   |                                                 |                          | N               | 38                                          | 38                                                                  | 38                                                                  | 38                                                                  | 35                                                                   |
|                   | PDA<br>intensity<br>alteration<br>after/before  | blood flow<br>alteration | Correlation     | .310                                        | -.246                                                               | 1.000                                                               | .072                                                                | .268                                                                 |
|                   |                                                 |                          | Coefficient     |                                             |                                                                     |                                                                     |                                                                     |                                                                      |
|                   |                                                 |                          | Sig. (2-tailed) | .058                                        | .137                                                                | .                                                                   | .669                                                                | .120                                                                 |
|                   |                                                 |                          | N               | 38                                          | 38                                                                  | 38                                                                  | 38                                                                  | 35                                                                   |
|                   | PHA<br>intensity<br>alteration<br>after/before  | blood flow<br>alteration | Correlation     | -.222                                       | -.109                                                               | .072                                                                | 1.000                                                               | -.198                                                                |
|                   |                                                 |                          | Coefficient     |                                             |                                                                     |                                                                     |                                                                     |                                                                      |
|                   |                                                 |                          | Sig. (2-tailed) | .180                                        | .515                                                                | .669                                                                | .                                                                   | .254                                                                 |
|                   |                                                 |                          | N               | 38                                          | 38                                                                  | 38                                                                  | 38                                                                  | 35                                                                   |
|                   | RGEA<br>intensity<br>alteration<br>after/before | blood flow<br>alteration | Correlation     | -.059                                       | -.057                                                               | .268                                                                | -.198                                                               | 1.000                                                                |
|                   |                                                 |                          | Coefficient     |                                             |                                                                     |                                                                     |                                                                     |                                                                      |
|                   |                                                 |                          | Sig. (2-tailed) | .736                                        | .746                                                                | .120                                                                | .254                                                                | .                                                                    |
|                   |                                                 |                          | N               | 35                                          | 35                                                                  | 35                                                                  | 35                                                                  | 35                                                                   |

#### Graph

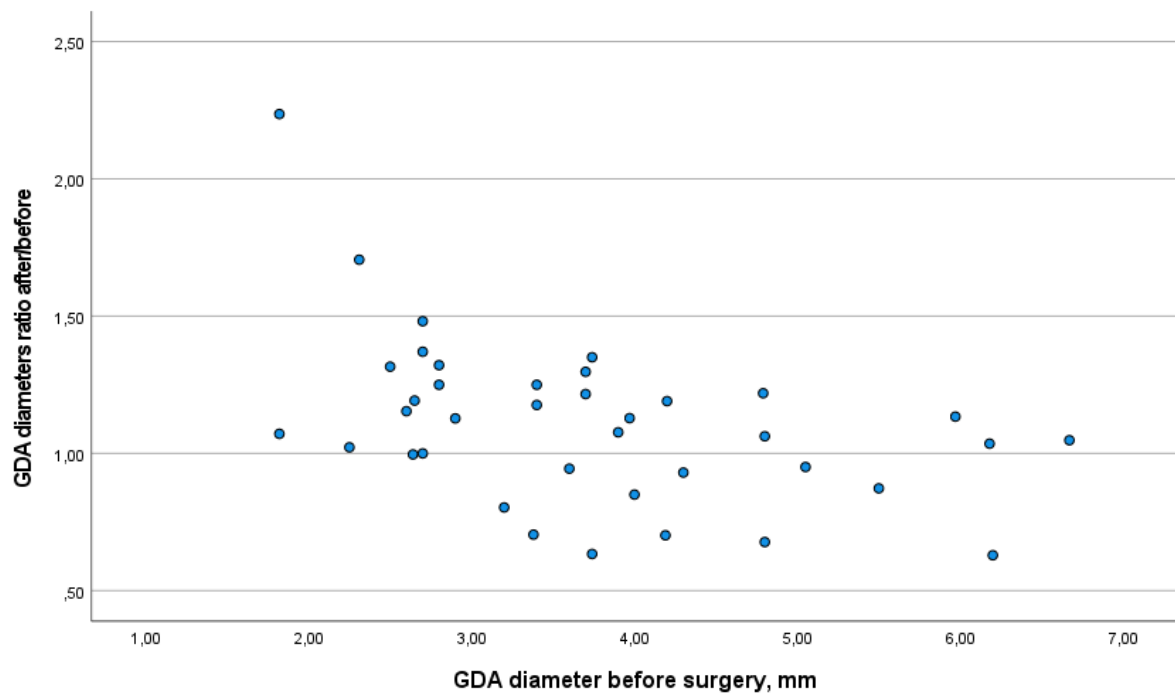

Graph

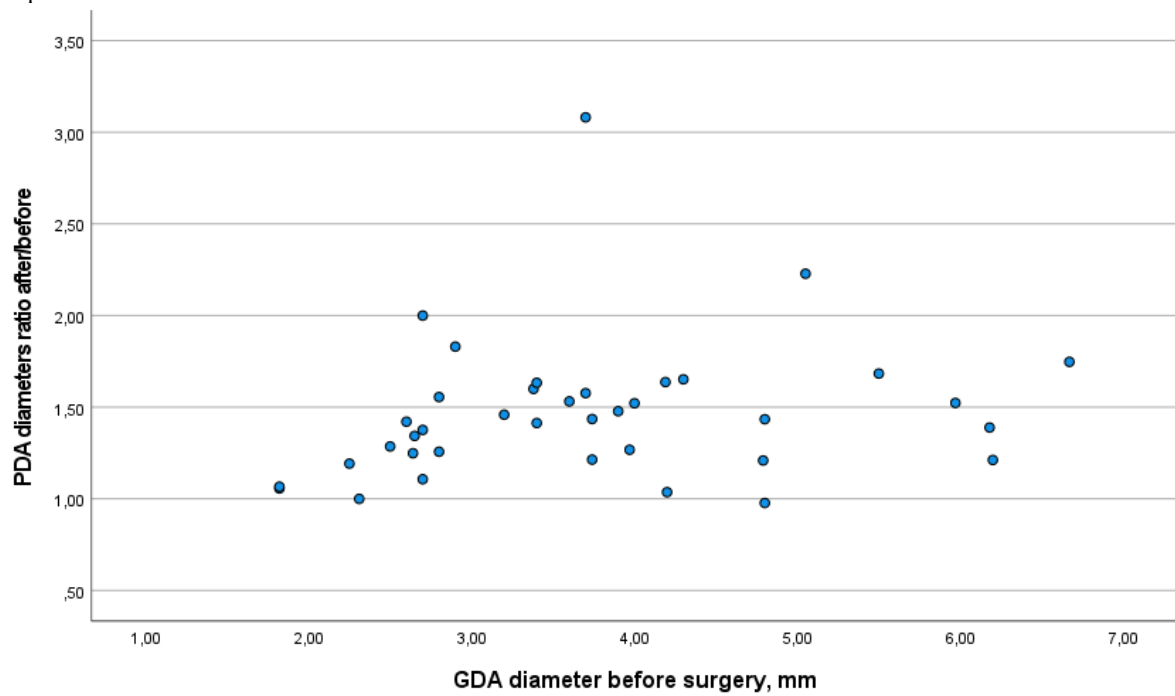

Graph

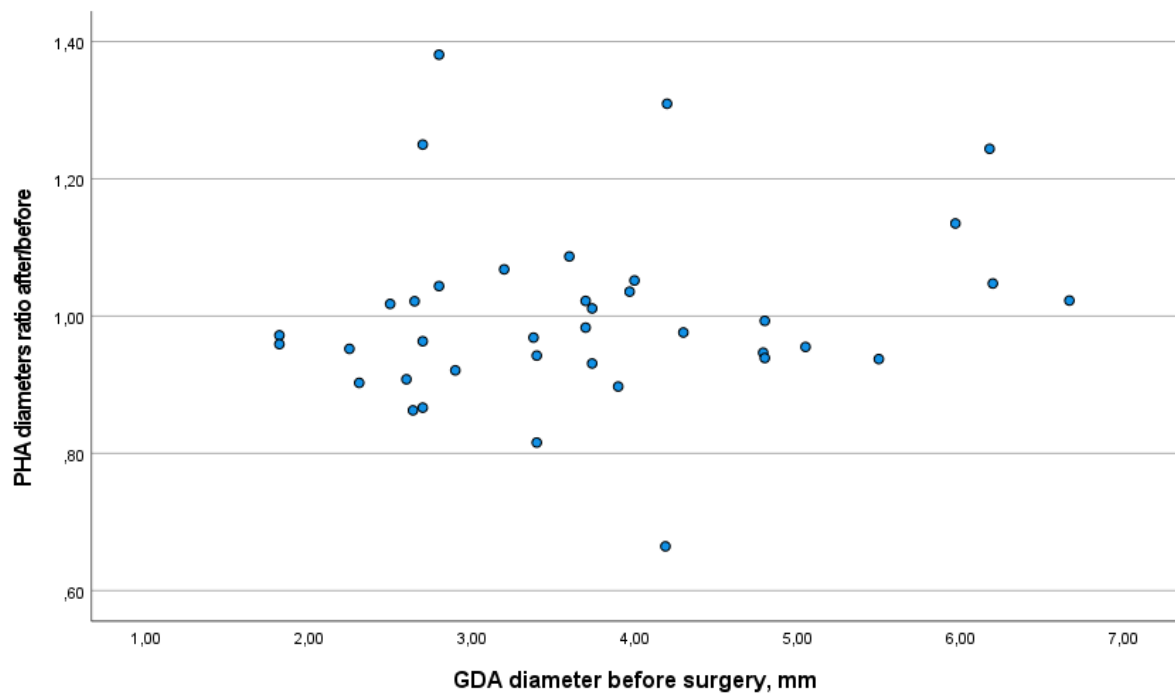

Graph

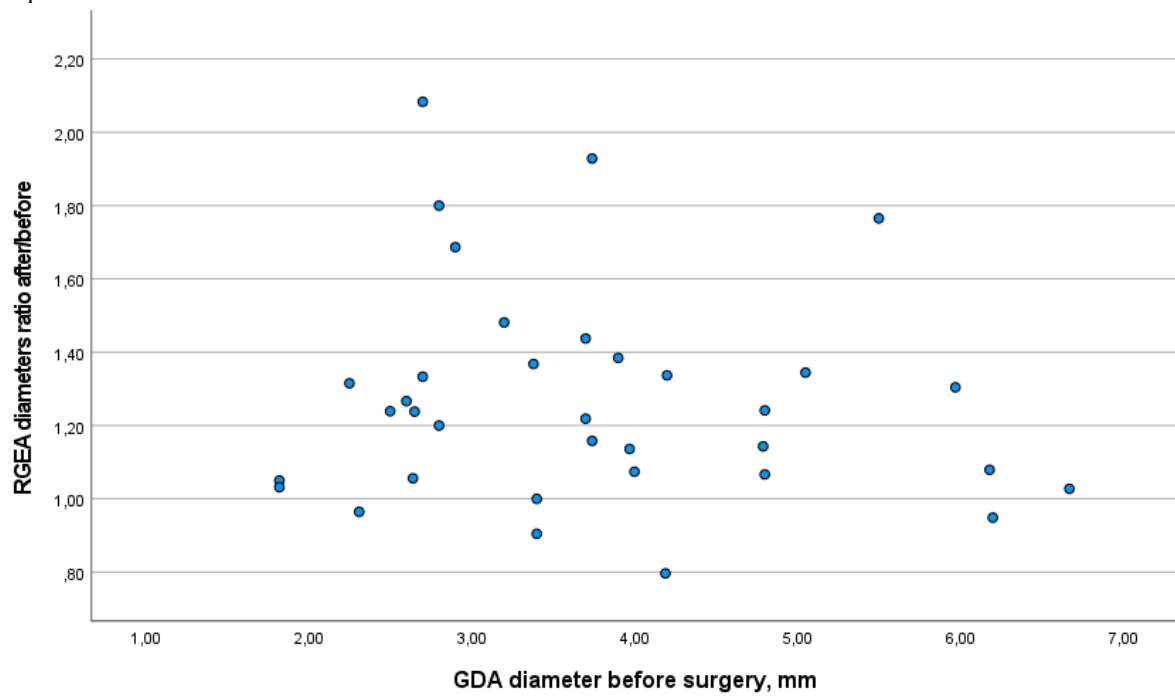

Correlations

| Correlations                                |                                           |                                           |                                           |                                            |
|---------------------------------------------|-------------------------------------------|-------------------------------------------|-------------------------------------------|--------------------------------------------|
| GDA<br>diameter<br>before<br>surgery.<br>mm | GDA<br>diameters<br>ratio<br>after/before | PDA<br>diameters<br>ratio<br>after/before | PHA<br>diameters<br>ratio<br>after/before | RGEA<br>diameters<br>ratio<br>after/before |

|                                   |                 |       |       |       |       |       |
|-----------------------------------|-----------------|-------|-------|-------|-------|-------|
| GDA diameter before surgery. mm   | Pearson         | 1     | -.465 | .196  | .154  | -.126 |
|                                   | Correlation     |       |       |       |       |       |
|                                   | Sig. (2-tailed) |       | .003  | .237  | .354  | .471  |
|                                   | N               | 38    | 38    | 38    | 38    | 35    |
| GDA diameters ratio after/before  | Pearson         | -.465 | 1     | -.159 | .152  | -.073 |
|                                   | Correlation     |       |       |       |       |       |
|                                   | Sig. (2-tailed) | .003  |       | .341  | .361  | .678  |
|                                   | N               | 38    | 38    | 38    | 38    | 35    |
| PDA diameters ratio after/before  | Pearson         | .196  | -.159 | 1     | -.107 | .111  |
|                                   | Correlation     |       |       |       |       |       |
|                                   | Sig. (2-tailed) | .237  | .341  |       | .522  | .524  |
|                                   | N               | 38    | 38    | 38    | 38    | 35    |
| PHA diameters ratio after/before  | Pearson         | .154  | .152  | -.107 | 1     | .403  |
|                                   | Correlation     |       |       |       |       |       |
|                                   | Sig. (2-tailed) | .354  | .361  | .522  |       | .016  |
|                                   | N               | 38    | 38    | 38    | 38    | 35    |
| RGEA diameters ratio after/before | Pearson         | -.126 | -.073 | .111  | .403  | 1     |
|                                   | Correlation     |       |       |       |       |       |
|                                   | Sig. (2-tailed) | .471  | .678  | .524  | .016  |       |
|                                   | N               | 35    | 35    | 35    | 35    | 35    |

#### Nonparametric Correlations

|                |                                  |                 |  | Correlations                    |                                  |                                  |                                  |                                   |
|----------------|----------------------------------|-----------------|--|---------------------------------|----------------------------------|----------------------------------|----------------------------------|-----------------------------------|
|                |                                  |                 |  | GDA diameter before surgery. mm | GDA diameters ratio after/before | PDA diameters ratio after/before | PHA diameters ratio after/before | RGEA diameters ratio after/before |
| Spearman's rho | GDA diameter before surgery. mm  | Correlation     |  | 1.000                           | -.459                            | .310                             | .222                             | -.059                             |
|                |                                  | Coefficient     |  |                                 |                                  |                                  |                                  |                                   |
|                |                                  | Sig. (2-tailed) |  | .                               | .004                             | .058                             | .180                             | .736                              |
|                | N                                |                 |  | 38                              | 38                               | 38                               | 38                               | 35                                |
|                | GDA diameters ratio after/before | Correlation     |  | -.459                           | 1.000                            | -.244                            | .106                             | -.059                             |
|                |                                  | Coefficient     |  |                                 |                                  |                                  |                                  |                                   |
|                |                                  | Sig. (2-tailed) |  | .004                            | .                                | .140                             | .527                             | .737                              |
|                | N                                |                 |  | 38                              | 38                               | 38                               | 38                               | 35                                |
|                | PDA diameters ratio after/before | Correlation     |  | .310                            | -.244                            | 1.000                            | -.072                            | .268                              |
|                |                                  | Coefficient     |  |                                 |                                  |                                  |                                  |                                   |
|                |                                  | Sig. (2-tailed) |  | .058                            | .140                             | .                                | .669                             | .120                              |
|                | N                                |                 |  | 38                              | 38                               | 38                               | 38                               | 35                                |
|                | PHA diameters ratio after/before | Correlation     |  | .222                            | .106                             | -.072                            | 1.000                            | .198                              |
|                |                                  | Coefficient     |  |                                 |                                  |                                  |                                  |                                   |



|                                      |                 |                 |       |       |      |      |       |
|--------------------------------------|-----------------|-----------------|-------|-------|------|------|-------|
|                                      |                 | Sig. (2-tailed) | .180  | .527  | .669 | .    | .254  |
|                                      |                 | N               | 38    | 38    | 38   | 38   | 35    |
| RGEA diameters<br>ratio after/before | Correlation     |                 | -.059 | -.059 | .268 | .198 | 1.000 |
|                                      | Coefficient     |                 |       |       |      |      |       |
|                                      | Sig. (2-tailed) |                 | .736  | .737  | .120 | .254 | .     |
|                                      | N               |                 | 35    | 35    | 35   | 35   | 35    |

Graph

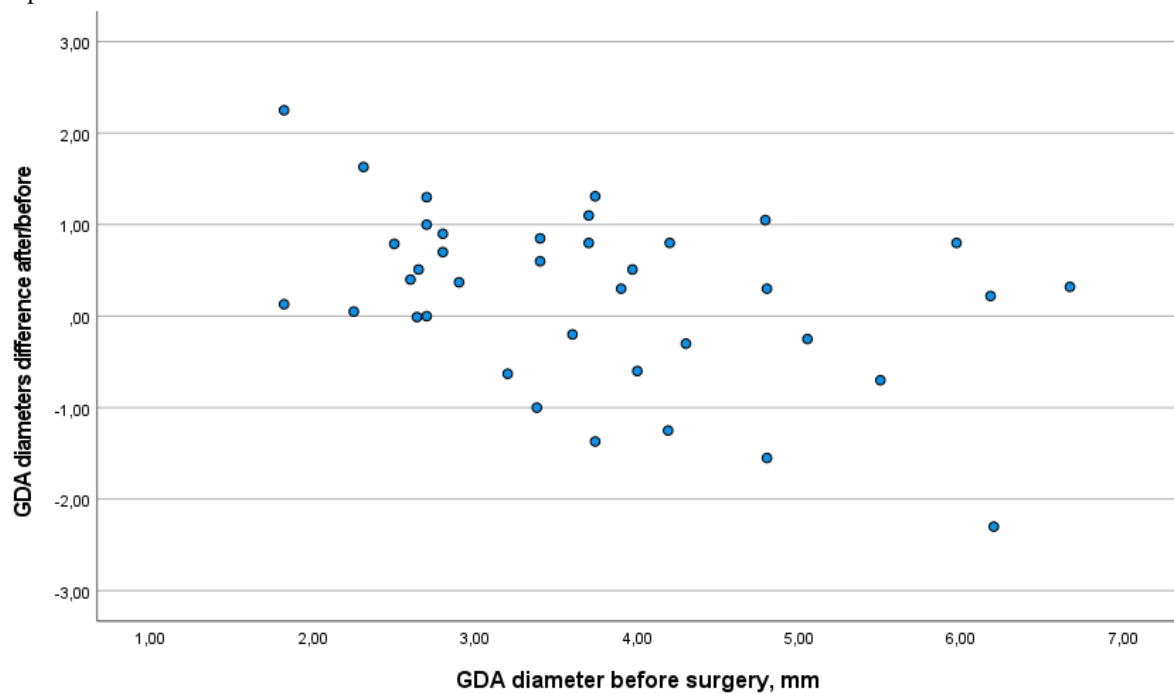

Graph

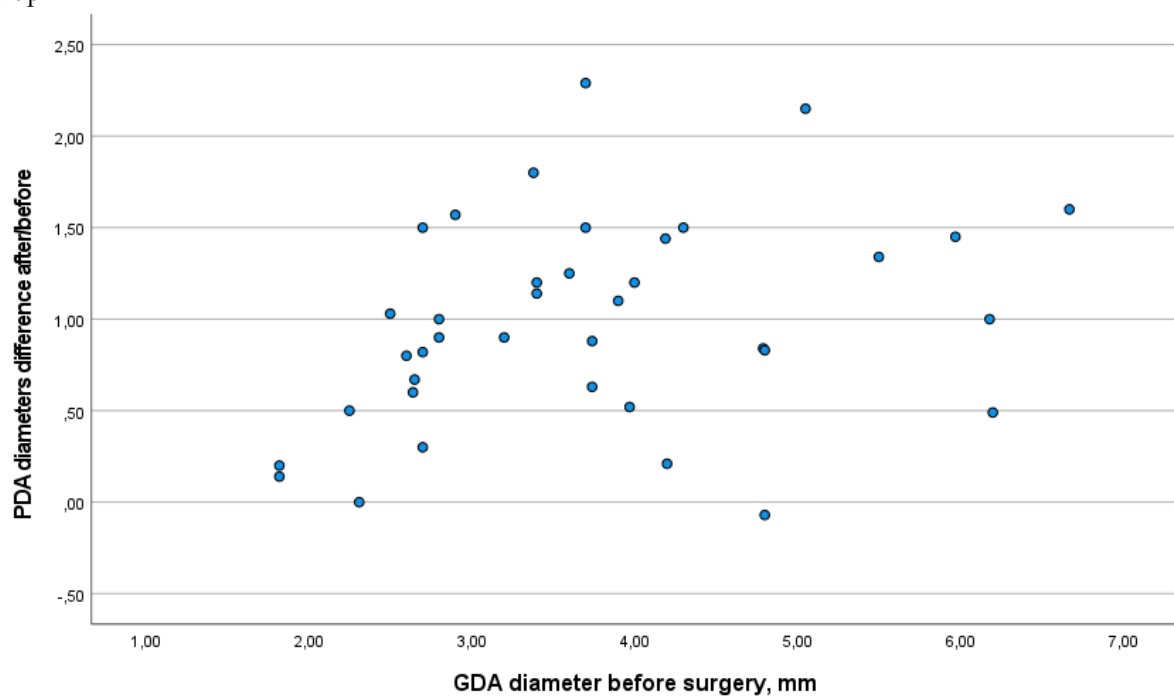

Graph

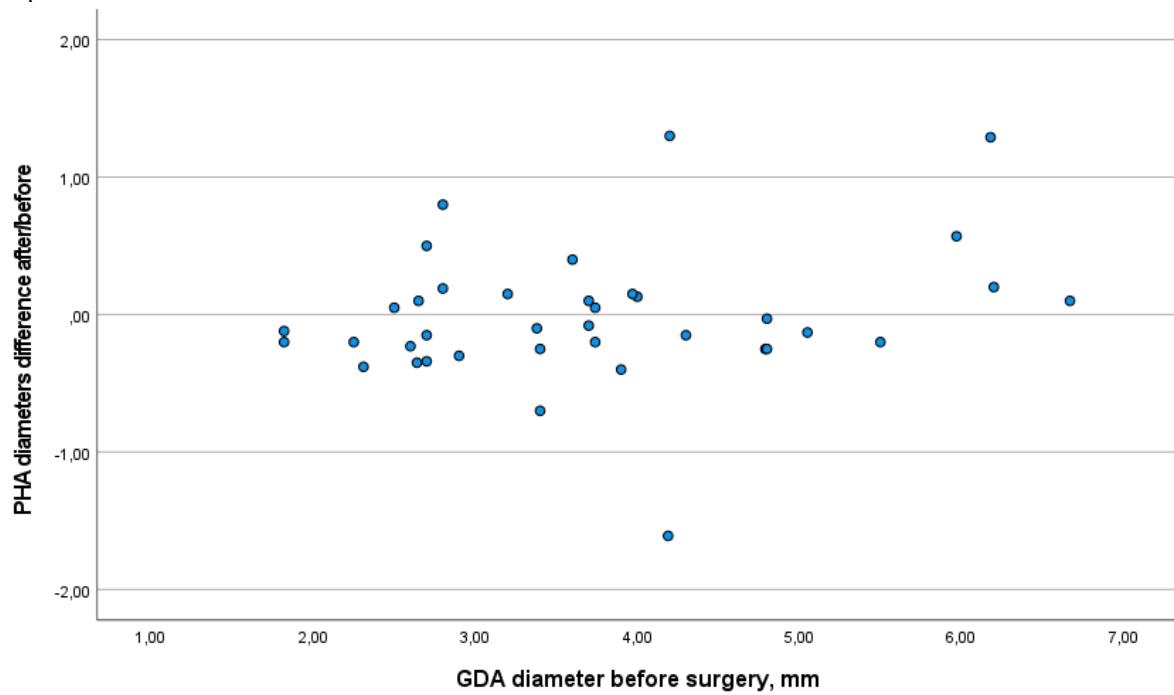

Graph

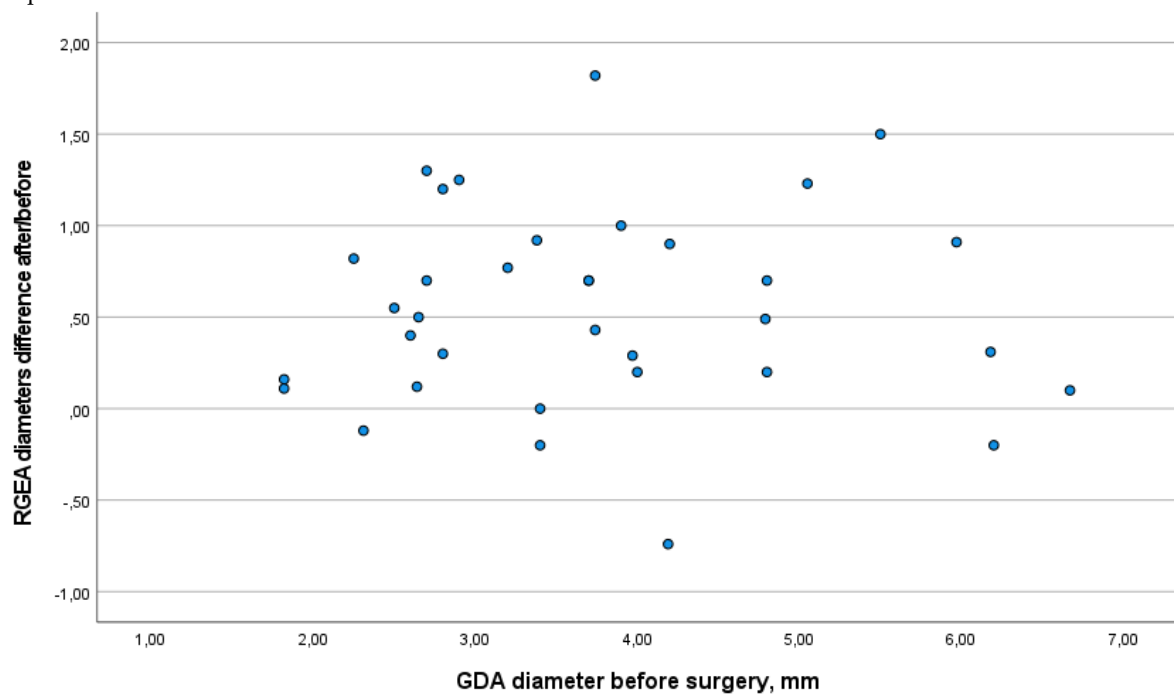

Correlations

| Correlations                                |                                                |                                                |                                                |                                                 |
|---------------------------------------------|------------------------------------------------|------------------------------------------------|------------------------------------------------|-------------------------------------------------|
| GDA<br>diameter<br>before<br>surgery.<br>mm | GDA<br>diameters<br>difference<br>after/before | PDA<br>diameters<br>difference<br>after/before | PHA<br>diameters<br>difference<br>after/before | RGEA<br>diameters<br>difference<br>after/before |
|                                             |                                                |                                                |                                                |                                                 |

|                                        |  |                 |       |       |       |       |       |
|----------------------------------------|--|-----------------|-------|-------|-------|-------|-------|
| GDA diameter before surgery. mm        |  | Pearson         | 1     | -.404 | .312  | .234  | -.001 |
|                                        |  | Correlation     |       |       |       |       |       |
|                                        |  | Sig. (2-tailed) |       | .012  | .057  | .157  | .994  |
|                                        |  | N               | 38    | 38    | 38    | 38    | 35    |
| GDA diameters difference after/before  |  | Pearson         | -.404 | 1     | -.187 | .176  | -.055 |
|                                        |  | Correlation     |       |       |       |       |       |
|                                        |  | Sig. (2-tailed) | .012  |       | .261  | .290  | .752  |
|                                        |  | N               | 38    | 38    | 38    | 38    | 35    |
| PDA diameters difference after/before  |  | Pearson         | .312  | -.187 | 1     | -.126 | .241  |
|                                        |  | Correlation     |       |       |       |       |       |
|                                        |  | Sig. (2-tailed) | .057  | .261  |       | .450  | .163  |
|                                        |  | N               | 38    | 38    | 38    | 38    | 35    |
| PHA diameters difference after/before  |  | Pearson         | .234  | .176  | -.126 | 1     | .349  |
|                                        |  | Correlation     |       |       |       |       |       |
|                                        |  | Sig. (2-tailed) | .157  | .290  | .450  |       | .040  |
|                                        |  | N               | 38    | 38    | 38    | 38    | 35    |
| RGEA diameters difference after/before |  | Pearson         | -.001 | -.055 | .241  | .349  | 1     |
|                                        |  | Correlation     |       |       |       |       |       |
|                                        |  | Sig. (2-tailed) | .994  | .752  | .163  | .040  |       |
|                                        |  | N               | 35    | 35    | 35    | 35    | 35    |

#### Nonparametric Correlations

|                   |                                   |                      |                 | Correlations                                |                                                    |                                                    |                                                    |                                                     |
|-------------------|-----------------------------------|----------------------|-----------------|---------------------------------------------|----------------------------------------------------|----------------------------------------------------|----------------------------------------------------|-----------------------------------------------------|
|                   |                                   |                      |                 | GDA<br>diameter<br>before<br>surgery.<br>mm | GDA<br>diameters<br>difference<br>after/befo<br>re | PDA<br>diameters<br>difference<br>after/befo<br>re | PHA<br>diameters<br>difference<br>after/befo<br>re | RGEA<br>diameters<br>difference<br>after/befor<br>e |
| Spearman's<br>rho | GDA<br>before<br>mm               | diameter<br>surgery. | Correlation     | 1.000                                       | -.350                                              | .343                                               | .237                                               | .051                                                |
|                   |                                   |                      | Coefficient     |                                             |                                                    |                                                    |                                                    |                                                     |
|                   |                                   |                      | Sig. (2-tailed) | .                                           | .031                                               | .035                                               | .151                                               | .770                                                |
|                   |                                   | N                    | 38              | 38                                          | 38                                                 | 38                                                 | 35                                                 |                                                     |
|                   | GDA<br>difference<br>after/before | diameters            | Correlation     | -.350                                       | 1.000                                              | -.166                                              | .057                                               | -.095                                               |
|                   |                                   |                      | Coefficient     |                                             |                                                    |                                                    |                                                    |                                                     |
|                   |                                   |                      | Sig. (2-tailed) | .031                                        | .                                                  | .318                                               | .732                                               | .587                                                |
|                   |                                   | N                    | 38              | 38                                          | 38                                                 | 38                                                 | 35                                                 |                                                     |
|                   | PDA<br>difference<br>after/before | diameters            | Correlation     | .343                                        | -.166                                              | 1.000                                              | -.002                                              | .255                                                |
|                   |                                   |                      | Coefficient     |                                             |                                                    |                                                    |                                                    |                                                     |
| Sig. (2-tailed)   |                                   |                      | .035            | .318                                        | .                                                  | .990                                               | .139                                               |                                                     |
|                   | N                                 | 38                   | 38              | 38                                          | 38                                                 | 35                                                 |                                                    |                                                     |
|                   |                                   | Correlation          | .237            | .057                                        | -.002                                              | 1.000                                              | .235                                               |                                                     |
|                   |                                   | Coefficient          |                 |                                             |                                                    |                                                    |                                                    |                                                     |

|              |           |                 |      |       |      |      |       |
|--------------|-----------|-----------------|------|-------|------|------|-------|
| PHA          | diameters | Sig. (2-tailed) | .151 | .732  | .990 | .    | .174  |
| difference   |           | N               | 38   | 38    | 38   | 38   | 35    |
| after/before |           |                 |      |       |      |      |       |
| RGEA         | diameters | Correlation     | .051 | -.095 | .255 | .235 | 1.000 |
| difference   |           | Coefficient     |      |       |      |      |       |
| after/before |           | Sig. (2-tailed) | .770 | .587  | .139 | .174 | .     |
|              |           | N               | 35   | 35    | 35   | 35   | 35    |

Graph

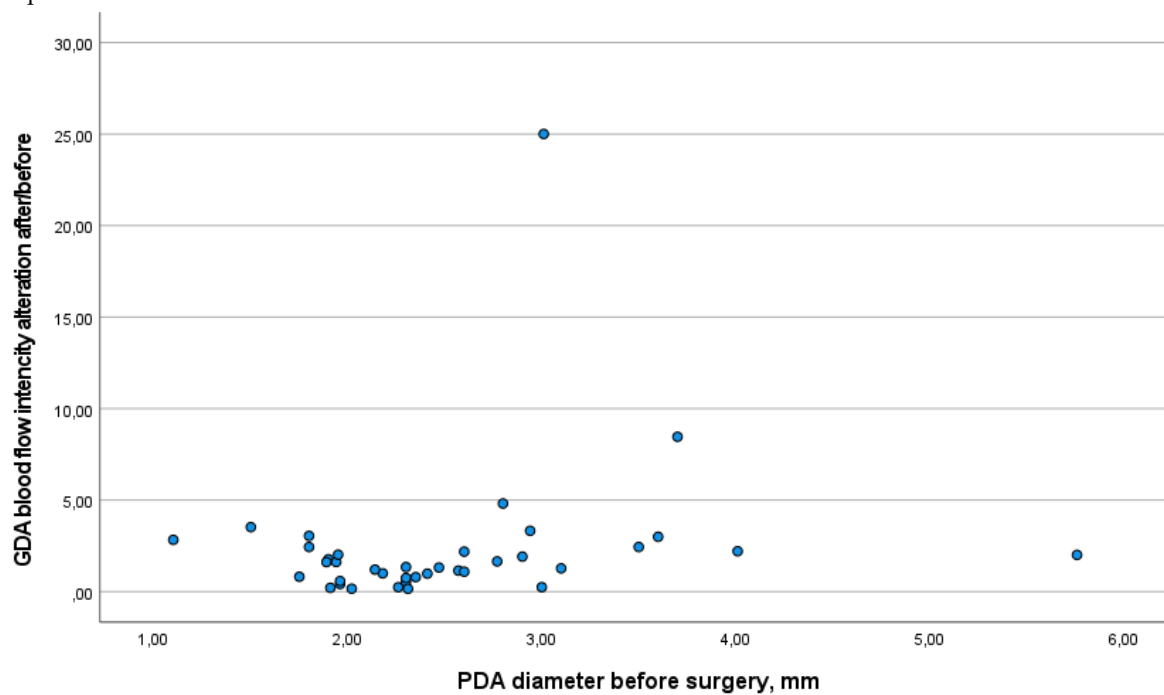

Graph

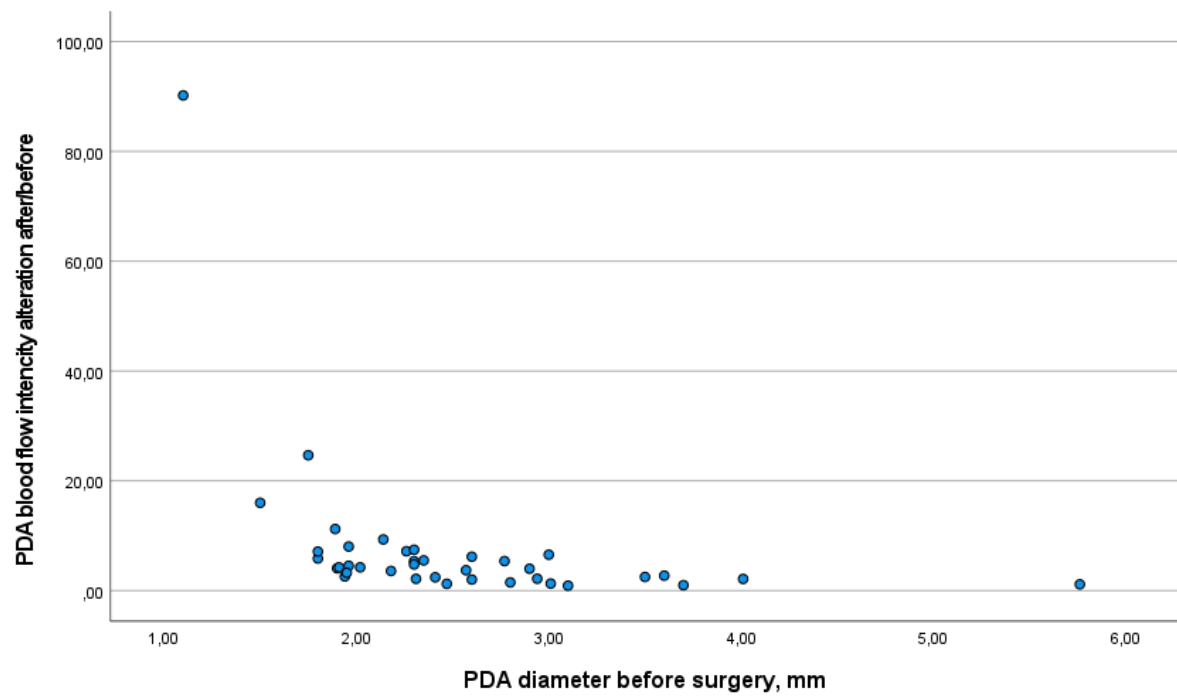

Graph

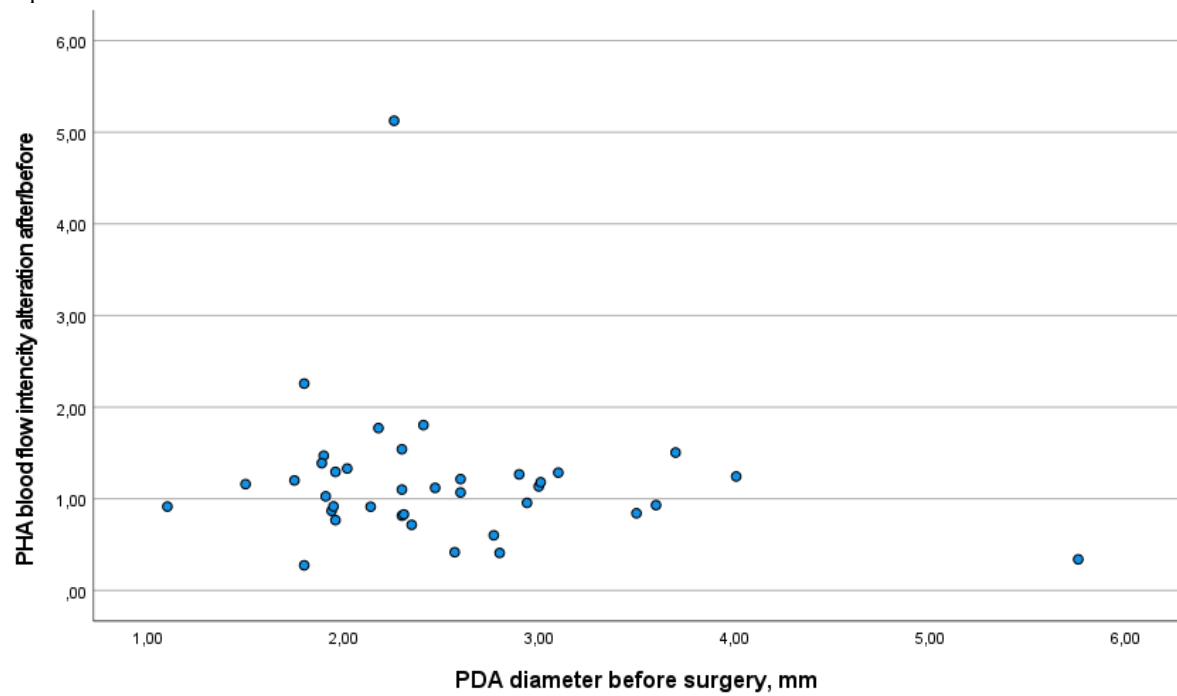

Graph

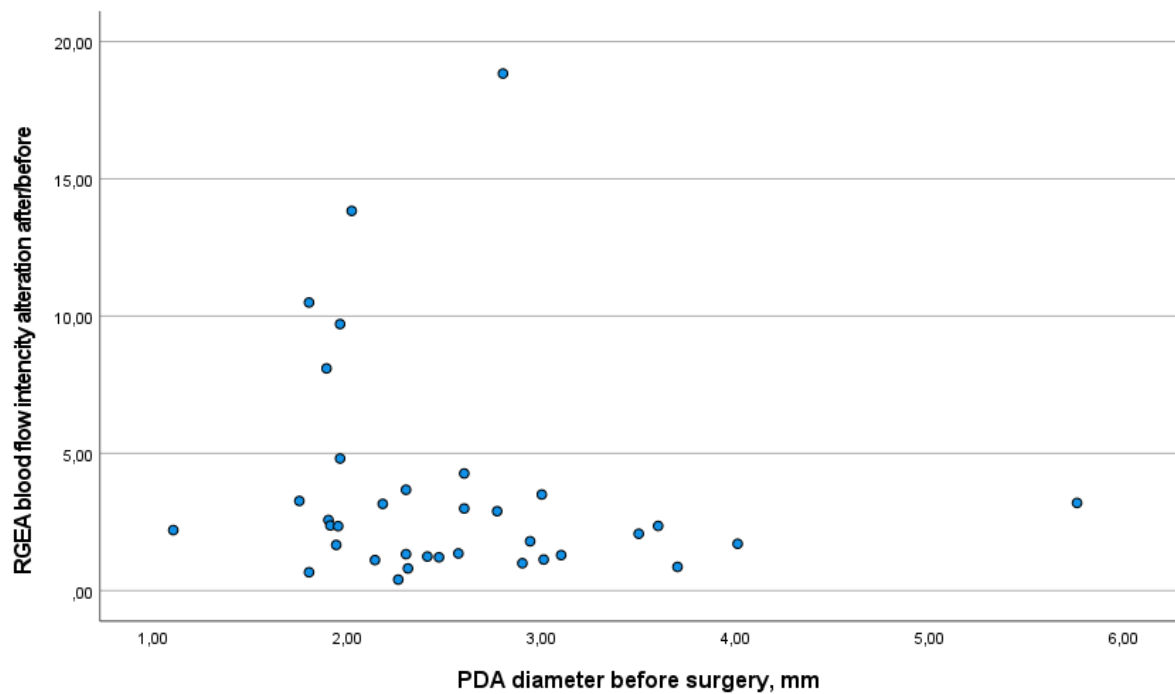

#### Correlations

|                                                   |                 | Correlations                    |                                                  |                                                  |                                                  |                                                   |
|---------------------------------------------------|-----------------|---------------------------------|--------------------------------------------------|--------------------------------------------------|--------------------------------------------------|---------------------------------------------------|
|                                                   |                 | PDA diameter before surgery, mm | GDA blood flow intensity alteration after/before | PDA blood flow intensity alteration after/before | PHA blood flow intensity alteration after/before | RGEA blood flow intensity alteration after/before |
| PDA diameter before surgery, mm                   | Pearson         | 1                               | .198                                             | -.413                                            | -.161                                            | -.144                                             |
|                                                   | Correlation     |                                 |                                                  |                                                  |                                                  |                                                   |
|                                                   | Sig. (2-tailed) |                                 | .234                                             | .010                                             | .333                                             | .409                                              |
|                                                   | N               | 38                              | 38                                               | 38                                               | 38                                               | 35                                                |
| GDA blood flow intensity alteration after/before  | Pearson         | .198                            | 1                                                | -.042                                            | -.057                                            | -.057                                             |
|                                                   | Correlation     |                                 |                                                  |                                                  |                                                  |                                                   |
|                                                   | Sig. (2-tailed) | .234                            |                                                  | .800                                             | .735                                             | .744                                              |
|                                                   | N               | 38                              | 38                                               | 38                                               | 38                                               | 35                                                |
| PDA blood flow intensity alteration after/before  | Pearson         | -.413                           | -.042                                            | 1                                                | -.015                                            | -.033                                             |
|                                                   | Correlation     |                                 |                                                  |                                                  |                                                  |                                                   |
|                                                   | Sig. (2-tailed) | .010                            | .800                                             |                                                  | .926                                             | .851                                              |
|                                                   | N               | 38                              | 38                                               | 38                                               | 38                                               | 35                                                |
| PHA blood flow intensity alteration after/before  | Pearson         | -.161                           | -.057                                            | -.015                                            | 1                                                | -.246                                             |
|                                                   | Correlation     |                                 |                                                  |                                                  |                                                  |                                                   |
|                                                   | Sig. (2-tailed) | .333                            | .735                                             | .926                                             |                                                  | .155                                              |
|                                                   | N               | 38                              | 38                                               | 38                                               | 38                                               | 35                                                |
| RGEA blood flow intensity alteration after/before | Pearson         | -.144                           | -.057                                            | -.033                                            | -.246                                            | 1                                                 |
|                                                   | Correlation     |                                 |                                                  |                                                  |                                                  |                                                   |
|                                                   | Sig. (2-tailed) | .409                            | .744                                             | .851                                             | .155                                             |                                                   |

|   |    |    |    |    |    |
|---|----|----|----|----|----|
| N | 35 | 35 | 35 | 35 | 35 |
|---|----|----|----|----|----|

# Nonparametric Correlations

|                                                 |                                                |                      |                 | Correlations                                |                                                                     |                                                                     |                                                                     |                                                                      |
|-------------------------------------------------|------------------------------------------------|----------------------|-----------------|---------------------------------------------|---------------------------------------------------------------------|---------------------------------------------------------------------|---------------------------------------------------------------------|----------------------------------------------------------------------|
|                                                 |                                                |                      |                 | PDA<br>diameter<br>before<br>surgery.<br>mm | GDA<br>blood<br>flow<br>intensity<br>alteration<br>after/befo<br>re | PDA<br>blood<br>flow<br>intensity<br>alteration<br>after/befo<br>re | PHA<br>blood<br>flow<br>intensity<br>alteration<br>after/befo<br>re | RGEA<br>blood<br>flow<br>intensity<br>alteration<br>after/befor<br>e |
| Spearman's<br>rho                               | PDA<br>before<br>mm                            | diameter<br>surgery. | Correlation     | 1.000                                       | .227                                                                | -.693                                                               | -.115                                                               | -.207                                                                |
|                                                 |                                                |                      | Coefficient     |                                             |                                                                     |                                                                     |                                                                     |                                                                      |
|                                                 |                                                |                      | Sig. (2-tailed) | .                                           | .170                                                                | .000                                                                | .490                                                                | .233                                                                 |
|                                                 |                                                | N                    | 38              | 38                                          | 38                                                                  | 38                                                                  | 35                                                                  |                                                                      |
|                                                 | GDA<br>intensity<br>alteration<br>after/before | blood<br>flow        | Correlation     | .227                                        | 1.000                                                               | -.246                                                               | -.109                                                               | -.057                                                                |
|                                                 |                                                |                      | Coefficient     |                                             |                                                                     |                                                                     |                                                                     |                                                                      |
|                                                 |                                                |                      | Sig. (2-tailed) | .170                                        | .                                                                   | .137                                                                | .515                                                                | .746                                                                 |
|                                                 |                                                | N                    | 38              | 38                                          | 38                                                                  | 38                                                                  | 35                                                                  |                                                                      |
|                                                 | PDA<br>intensity<br>alteration<br>after/before | blood<br>flow        | Correlation     | -.693                                       | -.246                                                               | 1.000                                                               | .072                                                                | .268                                                                 |
|                                                 |                                                |                      | Coefficient     |                                             |                                                                     |                                                                     |                                                                     |                                                                      |
|                                                 |                                                |                      | Sig. (2-tailed) | .000                                        | .137                                                                | .                                                                   | .669                                                                | .120                                                                 |
|                                                 |                                                | N                    | 38              | 38                                          | 38                                                                  | 38                                                                  | 35                                                                  |                                                                      |
|                                                 | PHA<br>intensity<br>alteration<br>after/before | blood<br>flow        | Correlation     | -.115                                       | -.109                                                               | .072                                                                | 1.000                                                               | -.198                                                                |
|                                                 |                                                |                      | Coefficient     |                                             |                                                                     |                                                                     |                                                                     |                                                                      |
|                                                 |                                                |                      | Sig. (2-tailed) | .490                                        | .515                                                                | .669                                                                | .                                                                   | .254                                                                 |
|                                                 | N                                              | 38                   | 38              | 38                                          | 38                                                                  | 35                                                                  |                                                                     |                                                                      |
| RGEA<br>intensity<br>alteration<br>after/before | blood<br>flow                                  | Correlation          | -.207           | -.057                                       | .268                                                                | -.198                                                               | 1.000                                                               |                                                                      |
|                                                 |                                                | Coefficient          |                 |                                             |                                                                     |                                                                     |                                                                     |                                                                      |
|                                                 |                                                | Sig. (2-tailed)      | .233            | .746                                        | .120                                                                | .254                                                                | .                                                                   |                                                                      |
|                                                 | N                                              | 35                   | 35              | 35                                          | 35                                                                  | 35                                                                  |                                                                     |                                                                      |

## Graph





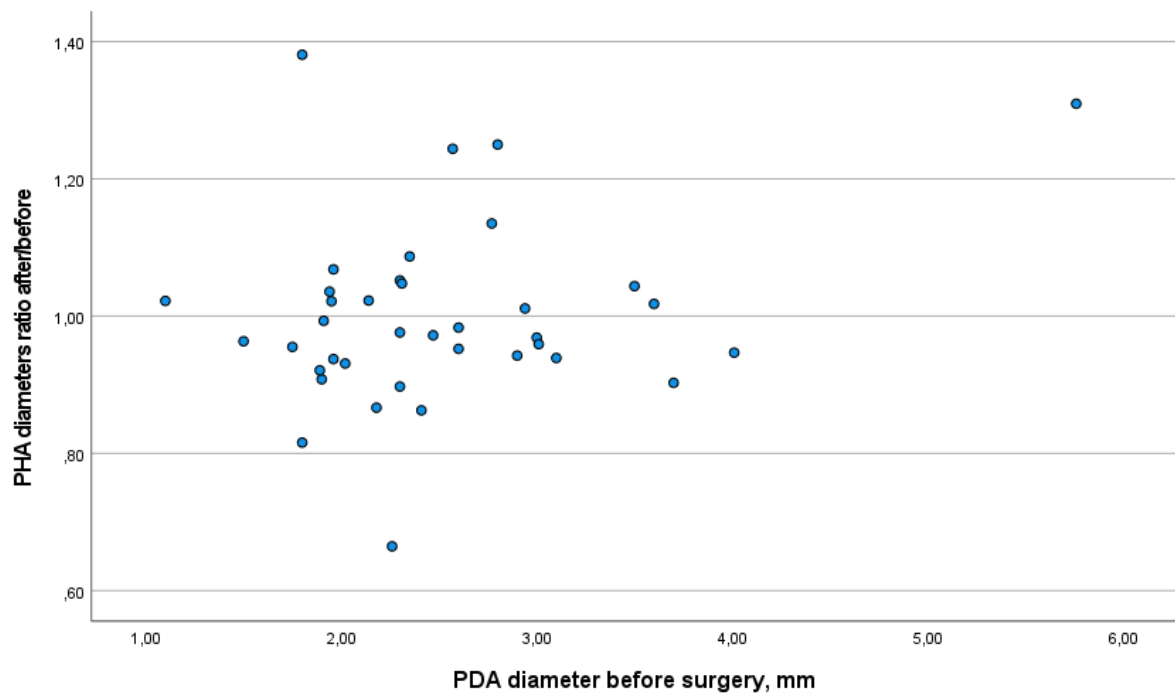

Graph

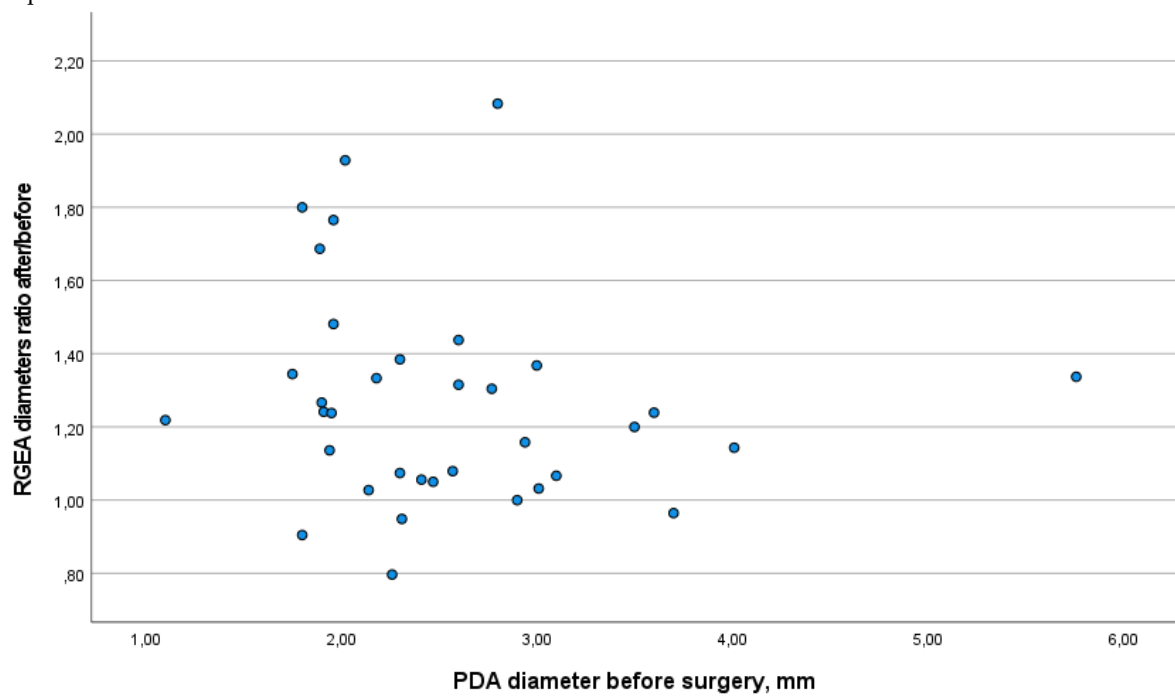

Correlations

| Correlations                    |                        |                                             |                                           |                                           |                                            |
|---------------------------------|------------------------|---------------------------------------------|-------------------------------------------|-------------------------------------------|--------------------------------------------|
|                                 |                        | PDA<br>diameter<br>before<br>surgery.<br>mm | GDA<br>diameters<br>ratio<br>after/before | PDA<br>diameters<br>ratio<br>after/before | PHA<br>diameters<br>ratio<br>after/before  |
| PDA diameter before surgery. mm | Pearson<br>Correlation | 1                                           | .269                                      | -.609                                     | .254                                       |
|                                 |                        |                                             |                                           |                                           | RGEA<br>diameters<br>ratio<br>after/before |
|                                 |                        |                                             |                                           |                                           | -.141                                      |

|                                   |                 |                 |    |       |       |       |       |
|-----------------------------------|-----------------|-----------------|----|-------|-------|-------|-------|
|                                   |                 | Sig. (2-tailed) |    | .102  | .000  | .123  | .419  |
|                                   | N               |                 | 38 | 38    | 38    | 38    | 35    |
| GDA diameters ratio after/before  | Pearson         | .269            |    | 1     | -.159 | .152  | -.073 |
|                                   | Correlation     |                 |    |       |       |       |       |
|                                   | Sig. (2-tailed) | .102            |    |       | .341  | .361  | .678  |
|                                   | N               |                 | 38 | 38    | 38    | 38    | 35    |
| PDA diameters ratio after/before  | Pearson         | -.609           |    | -.159 | 1     | -.107 | .111  |
|                                   | Correlation     |                 |    |       |       |       |       |
|                                   | Sig. (2-tailed) | .000            |    | .341  |       | .522  | .524  |
|                                   | N               |                 | 38 | 38    | 38    | 38    | 35    |
| PHA diameters ratio after/before  | Pearson         | .254            |    | .152  | -.107 | 1     | .403  |
|                                   | Correlation     |                 |    |       |       |       |       |
|                                   | Sig. (2-tailed) | .123            |    | .361  | .522  |       | .016  |
|                                   | N               |                 | 38 | 38    | 38    | 38    | 35    |
| RGEA diameters ratio after/before | Pearson         | -.141           |    | -.073 | .111  | .403  | 1     |
|                                   | Correlation     |                 |    |       |       |       |       |
|                                   | Sig. (2-tailed) | .419            |    | .678  | .524  | .016  |       |
|                                   | N               |                 | 35 | 35    | 35    | 35    | 35    |

#### Nonparametric Correlations

|                |                           |           |                 | Correlations                                |                                               |                                               |                                               |                                                |
|----------------|---------------------------|-----------|-----------------|---------------------------------------------|-----------------------------------------------|-----------------------------------------------|-----------------------------------------------|------------------------------------------------|
|                |                           |           |                 | PDA<br>diameter<br>before<br>surgery.<br>mm | GDA<br>diameters<br>ratio<br>after/befo<br>re | PDA<br>diameters<br>ratio<br>after/befo<br>re | PHA<br>diameters<br>ratio<br>after/befo<br>re | RGEA<br>diameters<br>ratio<br>after/befor<br>e |
| Spearman's rho | PDA<br>before<br>mm       | diameter  | Correlation     | 1.000                                       | .224                                          | -.693                                         | .115                                          | -.207                                          |
|                |                           | surgery.  | Coefficient     |                                             |                                               |                                               |                                               |                                                |
|                |                           |           | Sig. (2-tailed) | .                                           | .176                                          | .000                                          | .490                                          | .233                                           |
|                |                           |           | N               | 38                                          | 38                                            | 38                                            | 38                                            | 35                                             |
|                | GDA<br>ratio after/before | diameters | Correlation     | .224                                        | 1.000                                         | -.244                                         | .106                                          | -.059                                          |
|                |                           |           | Coefficient     |                                             |                                               |                                               |                                               |                                                |
|                |                           |           | Sig. (2-tailed) | .176                                        | .                                             | .140                                          | .527                                          | .737                                           |
|                |                           |           | N               | 38                                          | 38                                            | 38                                            | 38                                            | 35                                             |
|                | PDA<br>ratio after/before | diameters | Correlation     | -.693                                       | -.244                                         | 1.000                                         | -.072                                         | .268                                           |
|                |                           |           | Coefficient     |                                             |                                               |                                               |                                               |                                                |
|                |                           |           | Sig. (2-tailed) | .000                                        | .140                                          | .                                             | .669                                          | .120                                           |
|                |                           |           | N               | 38                                          | 38                                            | 38                                            | 38                                            | 35                                             |
|                | PHA<br>ratio after/before | diameters | Correlation     | .115                                        | .106                                          | -.072                                         | 1.000                                         | .198                                           |
|                |                           |           | Coefficient     |                                             |                                               |                                               |                                               |                                                |
|                |                           |           | Sig. (2-tailed) | .490                                        | .527                                          | .669                                          | .                                             | .254                                           |
|                |                           |           | N               |                                             |                                               |                                               |                                               |                                                |

|                                   |                 | N | 38    | 38    | 38   | 38   | 35    |
|-----------------------------------|-----------------|---|-------|-------|------|------|-------|
| RGEA diameters ratio after/before | Correlation     |   | -.207 | -.059 | .268 | .198 | 1.000 |
|                                   | Coefficient     |   |       |       |      |      |       |
|                                   | Sig. (2-tailed) |   | .233  | .737  | .120 | .254 | .     |
|                                   |                 | N | 35    | 35    | 35   | 35   | 35    |

Graph

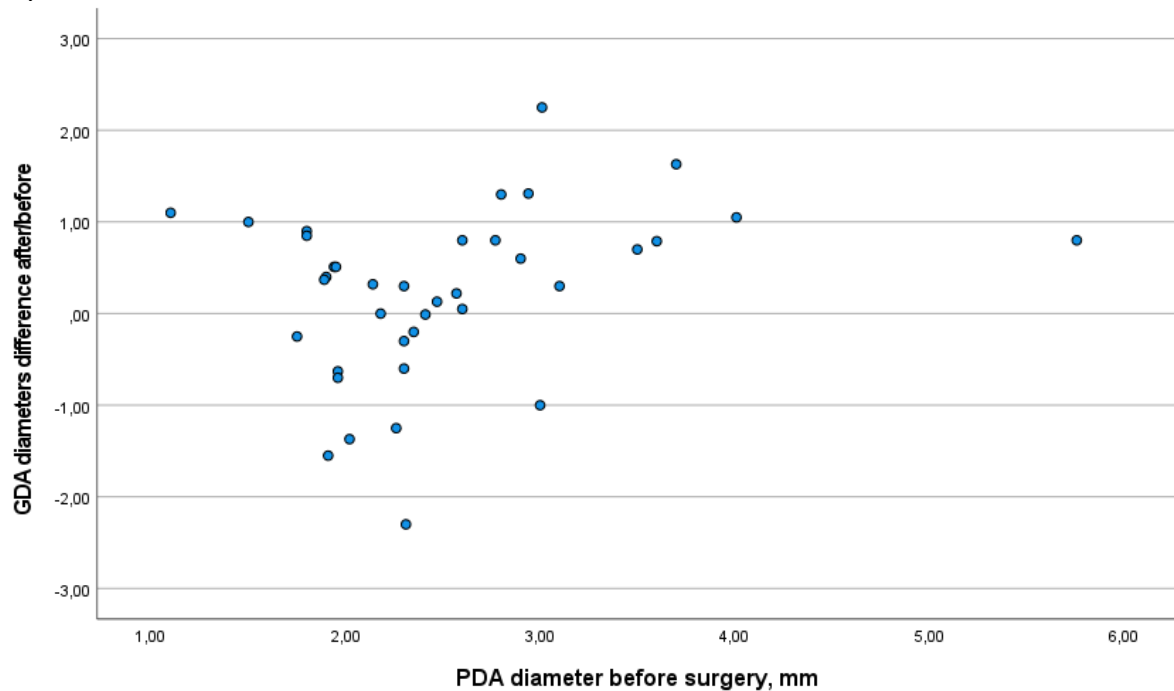

Graph

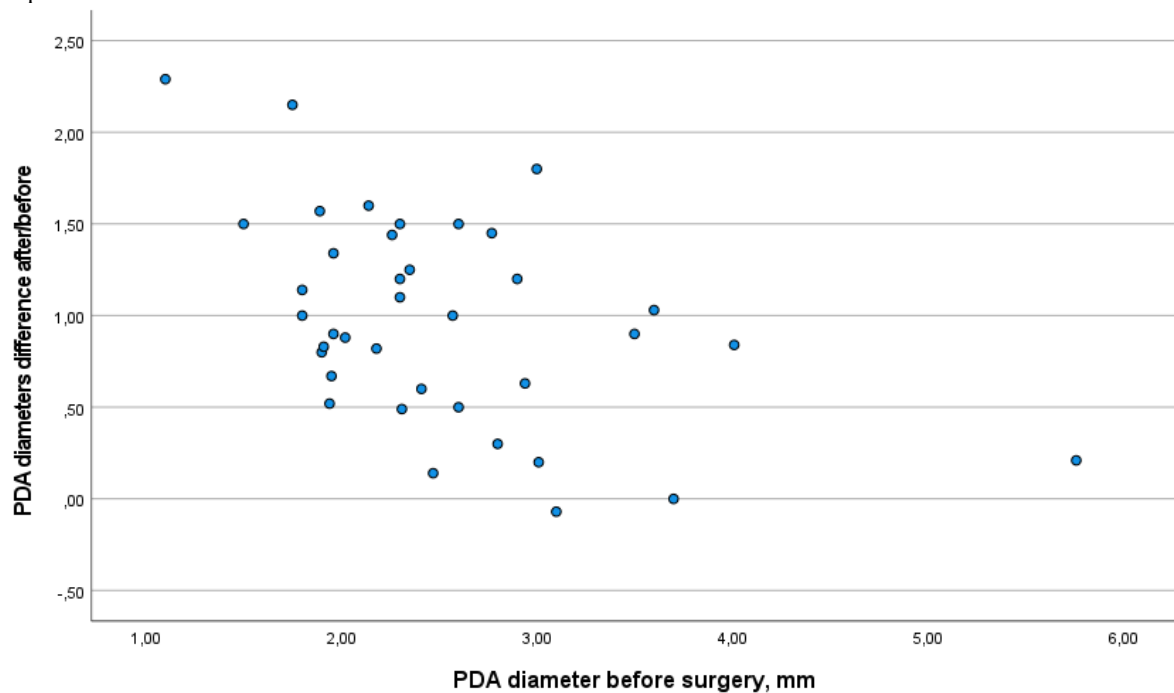

Graph

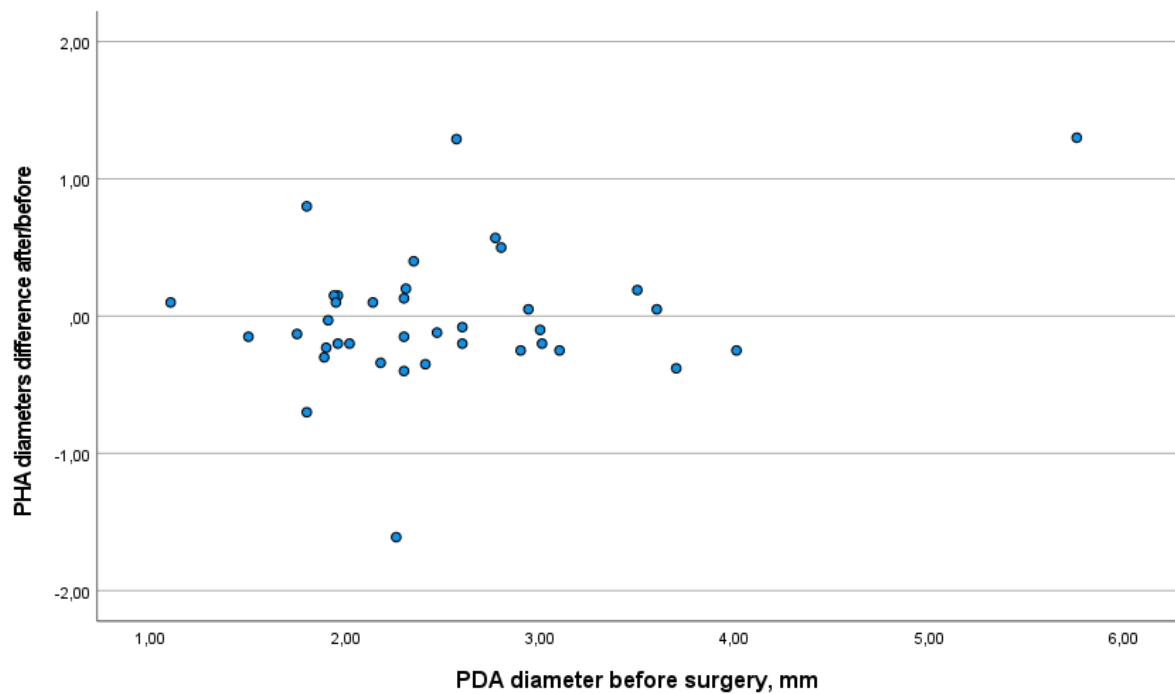

Graph

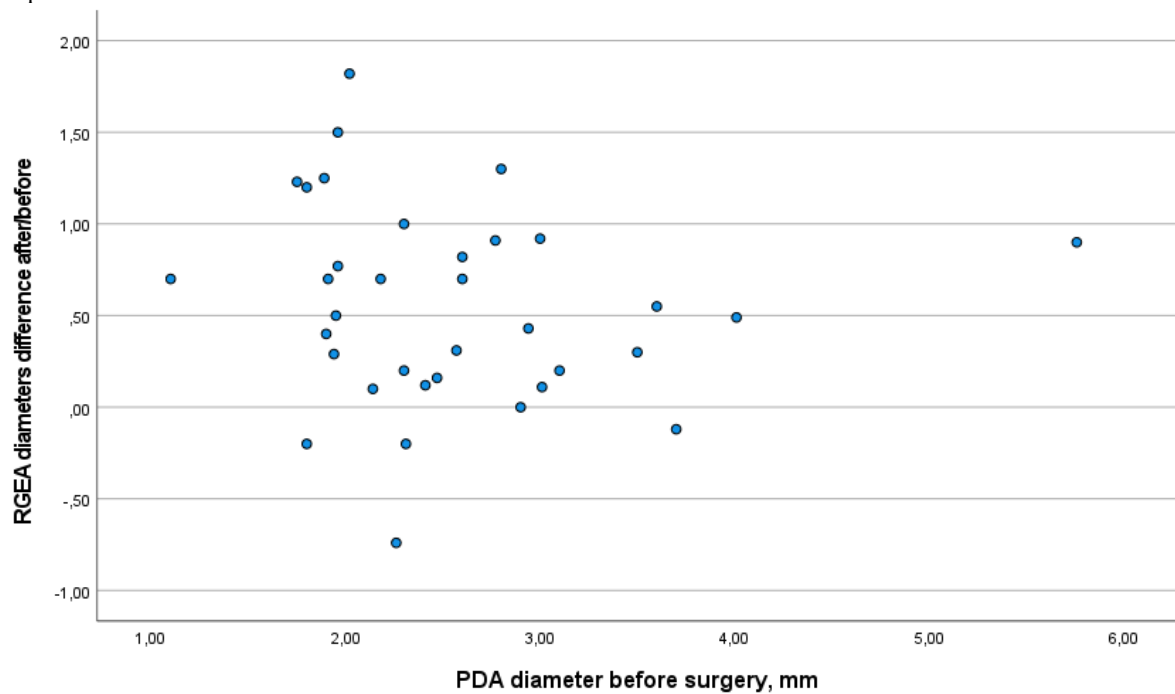

Correlations

| Correlations                                |                                                |                                                |                                                |                                                 |
|---------------------------------------------|------------------------------------------------|------------------------------------------------|------------------------------------------------|-------------------------------------------------|
| PDA<br>diameter<br>before<br>surgery.<br>mm | GDA<br>diameters<br>difference<br>after/before | PDA<br>diameters<br>difference<br>after/before | PHA<br>diameters<br>difference<br>after/before | RGEA<br>diameters<br>difference<br>after/before |

|                                 |           |                 |       |       |       |       |       |
|---------------------------------|-----------|-----------------|-------|-------|-------|-------|-------|
| PDA diameter before surgery. mm |           | Pearson         | 1     | .295  | -.477 | .294  | -.111 |
|                                 |           | Correlation     |       |       |       |       |       |
|                                 |           | Sig. (2-tailed) |       | .072  | .002  | .073  | .526  |
|                                 |           | N               | 38    | 38    | 38    | 38    | 35    |
| GDA difference after/before     | diameters | Pearson         | .295  | 1     | -.187 | .176  | -.055 |
|                                 |           | Correlation     |       |       |       |       |       |
|                                 |           | Sig. (2-tailed) | .072  |       | .261  | .290  | .752  |
|                                 |           | N               | 38    | 38    | 38    | 38    | 35    |
| PDA difference after/before     | diameters | Pearson         | -.477 | -.187 | 1     | -.126 | .241  |
|                                 |           | Correlation     |       |       |       |       |       |
|                                 |           | Sig. (2-tailed) | .002  | .261  |       | .450  | .163  |
|                                 |           | N               | 38    | 38    | 38    | 38    | 35    |
| PHA difference after/before     | diameters | Pearson         | .294  | .176  | -.126 | 1     | .349  |
|                                 |           | Correlation     |       |       |       |       |       |
|                                 |           | Sig. (2-tailed) | .073  | .290  | .450  |       | .040  |
|                                 |           | N               | 38    | 38    | 38    | 38    | 35    |
| RGEA difference after/before    | diameters | Pearson         | -.111 | -.055 | .241  | .349  | 1     |
|                                 |           | Correlation     |       |       |       |       |       |
|                                 |           | Sig. (2-tailed) | .526  | .752  | .163  | .040  |       |
|                                 |           | N               | 35    | 35    | 35    | 35    | 35    |

#### Nonparametric Correlations

|                   |                                   |                      | Correlations    |                                             |                                                    |                                                    |                                                    |                                                     |    |
|-------------------|-----------------------------------|----------------------|-----------------|---------------------------------------------|----------------------------------------------------|----------------------------------------------------|----------------------------------------------------|-----------------------------------------------------|----|
|                   |                                   |                      |                 | PDA<br>diameter<br>before<br>surgery.<br>mm | GDA<br>diameters<br>difference<br>after/befo<br>re | PDA<br>diameters<br>difference<br>after/befo<br>re | PHA<br>diameters<br>difference<br>after/befo<br>re | RGEA<br>diameters<br>difference<br>after/befor<br>e |    |
| Spearman's<br>rho | PDA<br>before<br>mm               | diameter<br>surgery. | Correlation     | 1.000                                       | .250                                               | -.430                                              | .065                                               | -.201                                               |    |
|                   |                                   |                      | Coefficient     |                                             |                                                    |                                                    |                                                    |                                                     |    |
|                   |                                   |                      | Sig. (2-tailed) | .                                           | .130                                               | .007                                               | .697                                               | .246                                                |    |
|                   |                                   |                      |                 | N                                           | 38                                                 | 38                                                 | 38                                                 | 38                                                  | 35 |
|                   | GDA<br>difference<br>after/before | diameters            | Correlation     | .250                                        | 1.000                                              | -.166                                              | .057                                               | -.095                                               |    |
|                   |                                   |                      | Coefficient     |                                             |                                                    |                                                    |                                                    |                                                     |    |
|                   |                                   |                      | Sig. (2-tailed) | .130                                        | .                                                  | .318                                               | .732                                               | .587                                                |    |
|                   |                                   |                      |                 | N                                           | 38                                                 | 38                                                 | 38                                                 | 38                                                  | 35 |
|                   | PDA<br>difference<br>after/before | diameters            | Correlation     | -.430                                       | -.166                                              | 1.000                                              | -.002                                              | .255                                                |    |
|                   |                                   |                      | Coefficient     |                                             |                                                    |                                                    |                                                    |                                                     |    |
|                   |                                   |                      | Sig. (2-tailed) | .007                                        | .318                                               | .                                                  | .990                                               | .139                                                |    |
|                   |                                   |                      |                 | N                                           | 38                                                 | 38                                                 | 38                                                 | 38                                                  | 35 |

|                                        |                         |                 |       |       |       |       |       |
|----------------------------------------|-------------------------|-----------------|-------|-------|-------|-------|-------|
| PHA diameters difference after/before  | Correlation Coefficient | Correlation     | .065  | .057  | -.002 | 1.000 | .235  |
|                                        |                         | Sig. (2-tailed) | .697  | .732  | .990  | .     | .174  |
|                                        |                         | N               | 38    | 38    | 38    | 38    | 35    |
|                                        |                         |                 |       |       |       |       |       |
| RGEA diameters difference after/before | Correlation Coefficient | Correlation     | -.201 | -.095 | .255  | .235  | 1.000 |
|                                        |                         | Sig. (2-tailed) | .246  | .587  | .139  | .174  | .     |
|                                        |                         | N               | 35    | 35    | 35    | 35    | 35    |
|                                        |                         |                 |       |       |       |       |       |

Graph

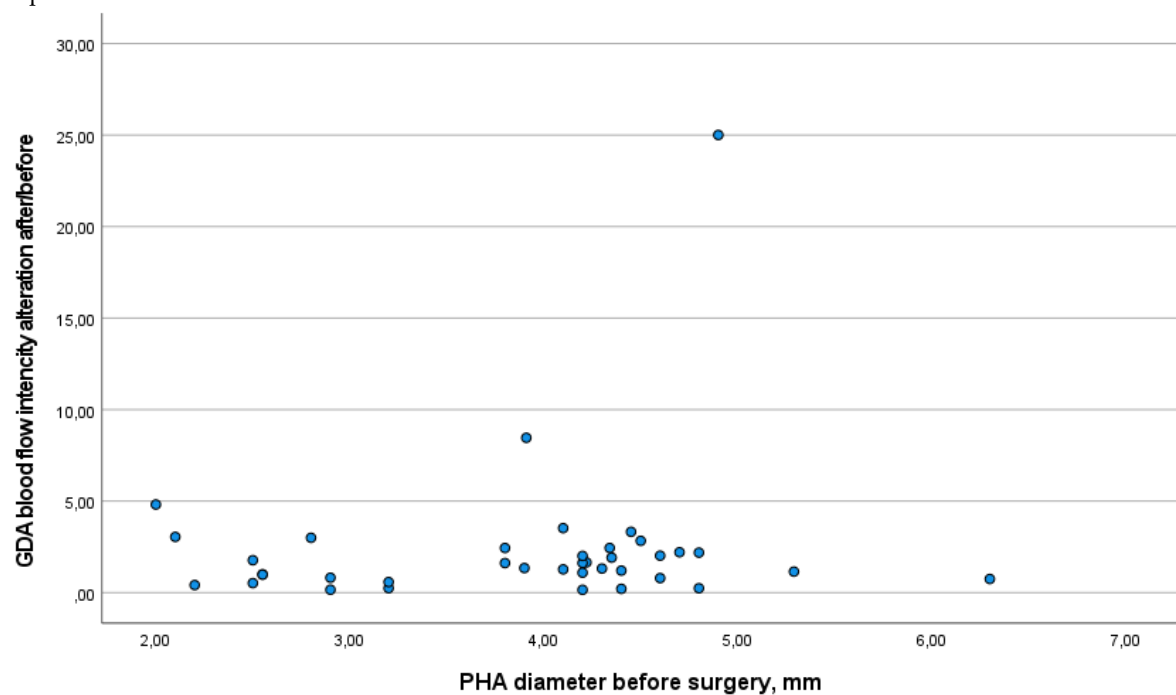

Graph

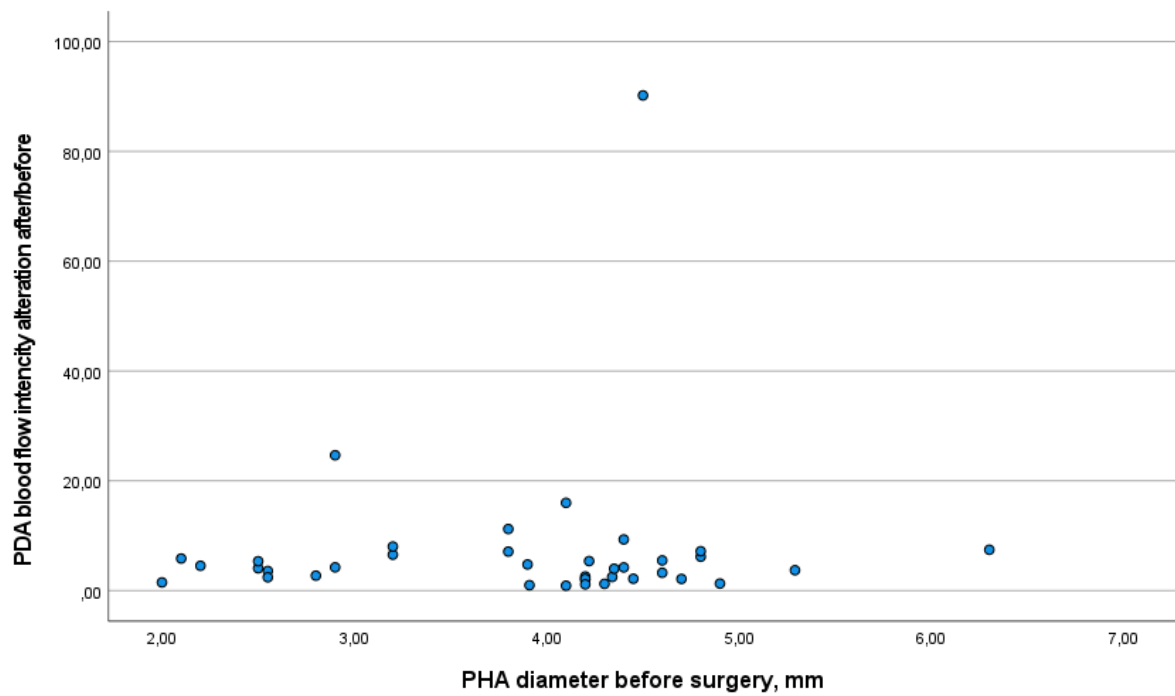

Graph

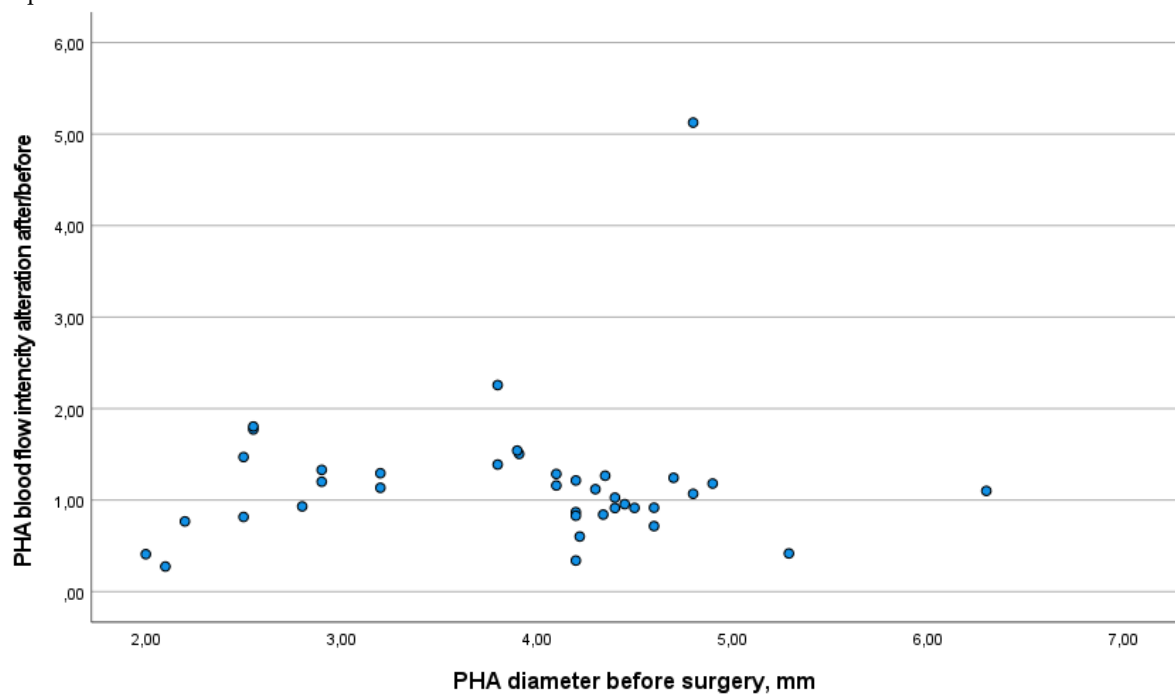

Graph

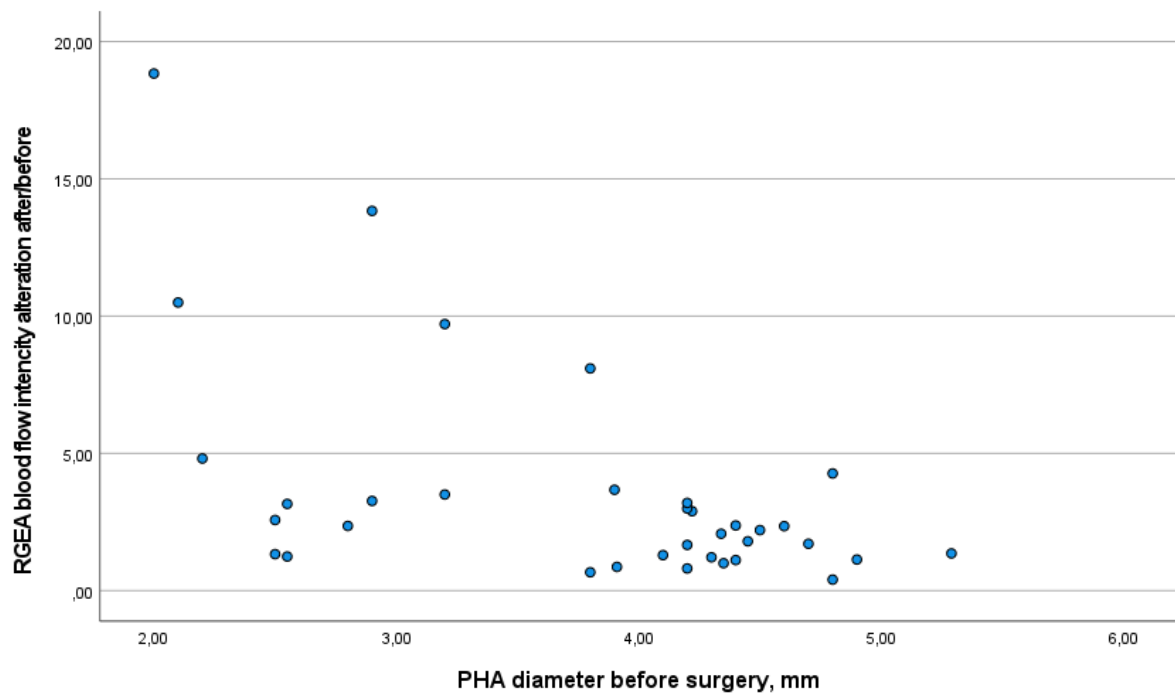

#### Correlations

|                                                   |                 | Correlations                    |                                                  |                                                  |                                                  |                                                   |
|---------------------------------------------------|-----------------|---------------------------------|--------------------------------------------------|--------------------------------------------------|--------------------------------------------------|---------------------------------------------------|
|                                                   |                 | PHA diameter before surgery. mm | GDA blood flow intensity alteration after/before | PDA blood flow intensity alteration after/before | PHA blood flow intensity alteration after/before | RGEA blood flow intensity alteration after/before |
| PHA diameter before surgery. mm                   | Pearson         | 1                               | .142                                             | .078                                             | .096                                             | -.537                                             |
|                                                   | Correlation     |                                 |                                                  |                                                  |                                                  |                                                   |
|                                                   | Sig. (2-tailed) |                                 | .396                                             | .640                                             | .566                                             | .001                                              |
|                                                   | N               | 38                              | 38                                               | 38                                               | 38                                               | 35                                                |
| GDA blood flow intensity alteration after/before  | Pearson         | .142                            | 1                                                | -.042                                            | -.057                                            | -.057                                             |
|                                                   | Correlation     |                                 |                                                  |                                                  |                                                  |                                                   |
|                                                   | Sig. (2-tailed) | .396                            |                                                  | .800                                             | .735                                             | .744                                              |
|                                                   | N               | 38                              | 38                                               | 38                                               | 38                                               | 35                                                |
| PDA blood flow intensity alteration after/before  | Pearson         | .078                            | -.042                                            | 1                                                | -.015                                            | -.033                                             |
|                                                   | Correlation     |                                 |                                                  |                                                  |                                                  |                                                   |
|                                                   | Sig. (2-tailed) | .640                            | .800                                             |                                                  | .926                                             | .851                                              |
|                                                   | N               | 38                              | 38                                               | 38                                               | 38                                               | 35                                                |
| PHA blood flow intensity alteration after/before  | Pearson         | .096                            | -.057                                            | -.015                                            | 1                                                | -.246                                             |
|                                                   | Correlation     |                                 |                                                  |                                                  |                                                  |                                                   |
|                                                   | Sig. (2-tailed) | .566                            | .735                                             | .926                                             |                                                  | .155                                              |
|                                                   | N               | 38                              | 38                                               | 38                                               | 38                                               | 35                                                |
| RGEA blood flow intensity alteration after/before | Pearson         | -.537                           | -.057                                            | -.033                                            | -.246                                            | 1                                                 |
|                                                   | Correlation     |                                 |                                                  |                                                  |                                                  |                                                   |
|                                                   | Sig. (2-tailed) | .001                            | .744                                             | .851                                             | .155                                             |                                                   |
|                                                   | N               | 38                              | 38                                               | 38                                               | 38                                               | 35                                                |



|   |    |    |    |    |    |
|---|----|----|----|----|----|
| N | 35 | 35 | 35 | 35 | 35 |
|---|----|----|----|----|----|

# Nonparametric Correlations

|                   |                                                                  |                 | Correlations                                |                                                                     |                                                                     |                                                                     |                                                                      |
|-------------------|------------------------------------------------------------------|-----------------|---------------------------------------------|---------------------------------------------------------------------|---------------------------------------------------------------------|---------------------------------------------------------------------|----------------------------------------------------------------------|
|                   |                                                                  |                 | PHA<br>diameter<br>before<br>surgery.<br>mm | GDA<br>blood<br>flow<br>intensity<br>alteration<br>after/befo<br>re | PDA<br>blood<br>flow<br>intensity<br>alteration<br>after/befo<br>re | PHA<br>blood<br>flow<br>intensity<br>alteration<br>after/befo<br>re | RGEA<br>blood<br>flow<br>intensity<br>alteration<br>after/befo<br>re |
| Spearman's<br>rho | PHA<br>diameter<br>before<br>surgery.<br>mm                      | Correlation     | 1.000                                       | .074                                                                | -.011                                                               | -.101                                                               | -.465                                                                |
|                   |                                                                  | Coefficient     |                                             |                                                                     |                                                                     |                                                                     |                                                                      |
|                   |                                                                  | Sig. (2-tailed) | .                                           | .658                                                                | .947                                                                | .545                                                                | .005                                                                 |
|                   | N                                                                |                 | 38                                          | 38                                                                  | 38                                                                  | 38                                                                  | 35                                                                   |
|                   | GDA<br>blood<br>flow<br>intensity<br>alteration<br>after/before  | Correlation     | .074                                        | 1.000                                                               | -.246                                                               | -.109                                                               | -.057                                                                |
|                   |                                                                  | Coefficient     |                                             |                                                                     |                                                                     |                                                                     |                                                                      |
|                   |                                                                  | Sig. (2-tailed) | .658                                        | .                                                                   | .137                                                                | .515                                                                | .746                                                                 |
|                   | N                                                                |                 | 38                                          | 38                                                                  | 38                                                                  | 38                                                                  | 35                                                                   |
|                   | PDA<br>blood<br>flow<br>intensity<br>alteration<br>after/before  | Correlation     | -.011                                       | -.246                                                               | 1.000                                                               | .072                                                                | .268                                                                 |
|                   |                                                                  | Coefficient     |                                             |                                                                     |                                                                     |                                                                     |                                                                      |
|                   |                                                                  | Sig. (2-tailed) | .947                                        | .137                                                                | .                                                                   | .669                                                                | .120                                                                 |
|                   | N                                                                |                 | 38                                          | 38                                                                  | 38                                                                  | 38                                                                  | 35                                                                   |
|                   | PHA<br>blood<br>flow<br>intensity<br>alteration<br>after/before  | Correlation     | -.101                                       | -.109                                                               | .072                                                                | 1.000                                                               | -.198                                                                |
|                   |                                                                  | Coefficient     |                                             |                                                                     |                                                                     |                                                                     |                                                                      |
|                   |                                                                  | Sig. (2-tailed) | .545                                        | .515                                                                | .669                                                                | .                                                                   | .254                                                                 |
|                   | N                                                                |                 | 38                                          | 38                                                                  | 38                                                                  | 38                                                                  | 35                                                                   |
|                   | RGEA<br>blood<br>flow<br>intensity<br>alteration<br>after/before | Correlation     | -.465                                       | -.057                                                               | .268                                                                | -.198                                                               | 1.000                                                                |
|                   |                                                                  | Coefficient     |                                             |                                                                     |                                                                     |                                                                     |                                                                      |
|                   |                                                                  | Sig. (2-tailed) | .005                                        | .746                                                                | .120                                                                | .254                                                                | .                                                                    |
|                   | N                                                                |                 | 35                                          | 35                                                                  | 35                                                                  | 35                                                                  | 35                                                                   |

## Graph

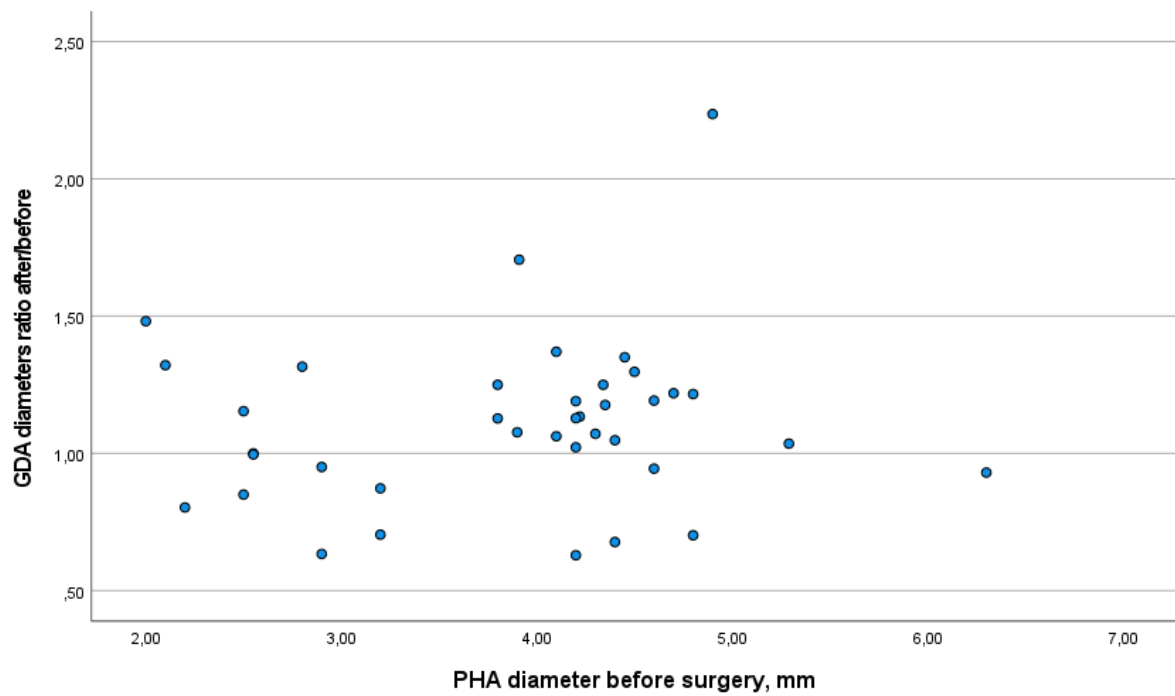

Graph

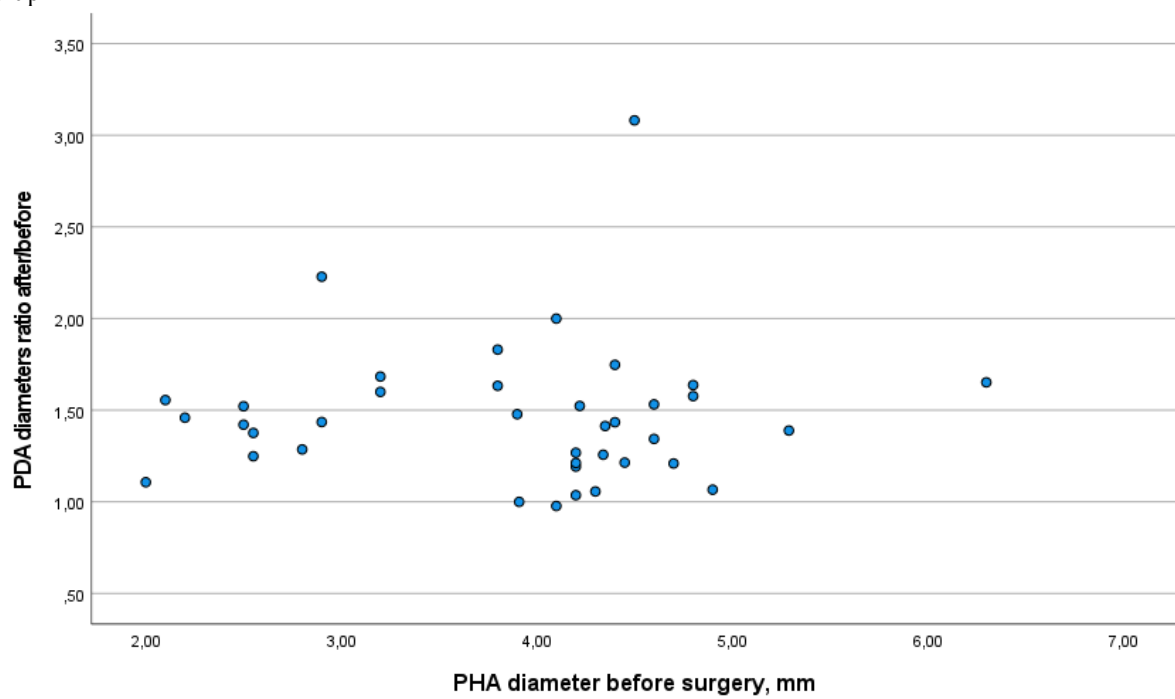

Graph

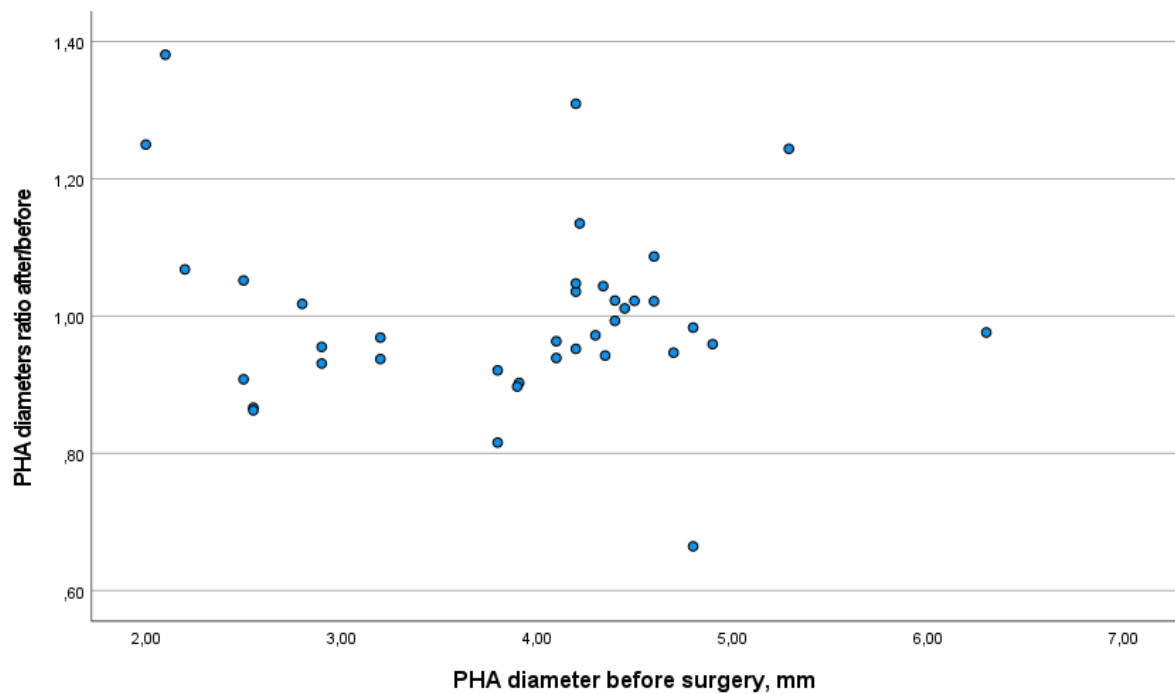

Graph

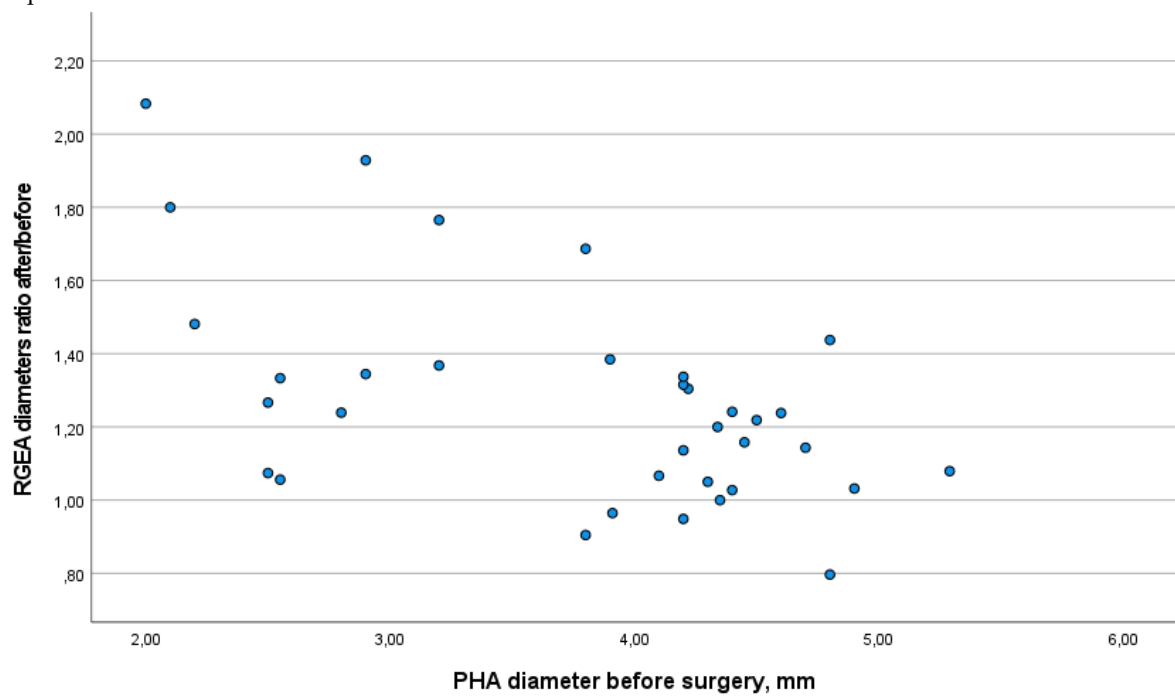

Correlations

| Correlations                    |                        |                                             |                                           |                                           |                                           |
|---------------------------------|------------------------|---------------------------------------------|-------------------------------------------|-------------------------------------------|-------------------------------------------|
|                                 |                        | PHA<br>diameter<br>before<br>surgery.<br>mm | GDA<br>diameters<br>ratio<br>after/before | PDA<br>diameters<br>ratio<br>after/before | PHA<br>diameters<br>ratio<br>after/before |
| PHA diameter before surgery. mm | Pearson<br>Correlation | 1                                           | .110                                      | .029                                      | -.120                                     |
|                                 |                        |                                             |                                           |                                           | -.546                                     |

|                                   |                 |                 |       |       |       |       |       |
|-----------------------------------|-----------------|-----------------|-------|-------|-------|-------|-------|
|                                   |                 | Sig. (2-tailed) |       | .509  | .864  | .475  | .001  |
|                                   | N               |                 | 38    | 38    | 38    | 38    | 35    |
| GDA diameters ratio after/before  | Pearson         |                 | .110  | 1     | -.159 | .152  | -.073 |
|                                   | Correlation     |                 |       |       |       |       |       |
|                                   | Sig. (2-tailed) |                 | .509  |       | .341  | .361  | .678  |
|                                   | N               |                 | 38    | 38    | 38    | 38    | 35    |
| PDA diameters ratio after/before  | Pearson         |                 | .029  | -.159 | 1     | -.107 | .111  |
|                                   | Correlation     |                 |       |       |       |       |       |
|                                   | Sig. (2-tailed) |                 | .864  | .341  |       | .522  | .524  |
|                                   | N               |                 | 38    | 38    | 38    | 38    | 35    |
| PHA diameters ratio after/before  | Pearson         |                 | -.120 | .152  | -.107 | 1     | .403  |
|                                   | Correlation     |                 |       |       |       |       |       |
|                                   | Sig. (2-tailed) |                 | .475  | .361  | .522  |       | .016  |
|                                   | N               |                 | 38    | 38    | 38    | 38    | 35    |
| RGEA diameters ratio after/before | Pearson         |                 | -.546 | -.073 | .111  | .403  | 1     |
|                                   | Correlation     |                 |       |       |       |       |       |
|                                   | Sig. (2-tailed) |                 | .001  | .678  | .524  | .016  |       |
|                                   | N               |                 | 35    | 35    | 35    | 35    | 35    |

#### Nonparametric Correlations

|                |                           |                      |                 | Correlations                                |                                               |                                               |                                               |                                                |
|----------------|---------------------------|----------------------|-----------------|---------------------------------------------|-----------------------------------------------|-----------------------------------------------|-----------------------------------------------|------------------------------------------------|
|                |                           |                      |                 | PHA<br>diameter<br>before<br>surgery.<br>mm | GDA<br>diameters<br>ratio<br>after/befo<br>re | PDA<br>diameters<br>ratio<br>after/befo<br>re | PHA<br>diameters<br>ratio<br>after/befo<br>re | RGEA<br>diameters<br>ratio<br>after/befor<br>e |
| Spearman's rho | PHA<br>before<br>mm       | diameter<br>surgery. | Correlation     | 1.000                                       | .073                                          | -.011                                         | .101                                          | -.465                                          |
|                |                           |                      | Coefficient     |                                             |                                               |                                               |                                               |                                                |
|                |                           |                      | Sig. (2-tailed) | .                                           | .663                                          | .947                                          | .545                                          | .005                                           |
|                |                           |                      | N               | 38                                          | 38                                            | 38                                            | 38                                            | 35                                             |
|                | GDA<br>ratio after/before | diameters            | Correlation     | .073                                        | 1.000                                         | -.244                                         | .106                                          | -.059                                          |
|                |                           |                      | Coefficient     |                                             |                                               |                                               |                                               |                                                |
|                |                           |                      | Sig. (2-tailed) | .663                                        | .                                             | .140                                          | .527                                          | .737                                           |
|                |                           |                      | N               | 38                                          | 38                                            | 38                                            | 38                                            | 35                                             |
|                | PDA<br>ratio after/before | diameters            | Correlation     | -.011                                       | -.244                                         | 1.000                                         | -.072                                         | .268                                           |
|                |                           |                      | Coefficient     |                                             |                                               |                                               |                                               |                                                |
|                |                           |                      | Sig. (2-tailed) | .947                                        | .140                                          | .                                             | .669                                          | .120                                           |
|                |                           |                      | N               | 38                                          | 38                                            | 38                                            | 38                                            | 35                                             |
|                | PHA<br>ratio after/before | diameters            | Correlation     | .101                                        | .106                                          | -.072                                         | 1.000                                         | .198                                           |
|                |                           |                      | Coefficient     |                                             |                                               |                                               |                                               |                                                |
|                |                           |                      | Sig. (2-tailed) | .545                                        | .527                                          | .669                                          | .                                             | .254                                           |
| N              |                           |                      | 38              | 38                                          | 38                                            | 38                                            | 35                                            |                                                |

|                                      |                 |       |       |      |      |       |
|--------------------------------------|-----------------|-------|-------|------|------|-------|
| RGEA diameters<br>ratio after/before | Correlation     | -.465 | -.059 | .268 | .198 | 1.000 |
|                                      | Coefficient     |       |       |      |      |       |
|                                      | Sig. (2-tailed) | .005  | .737  | .120 | .254 | .     |
|                                      | N               | 35    | 35    | 35   | 35   | 35    |

Graph

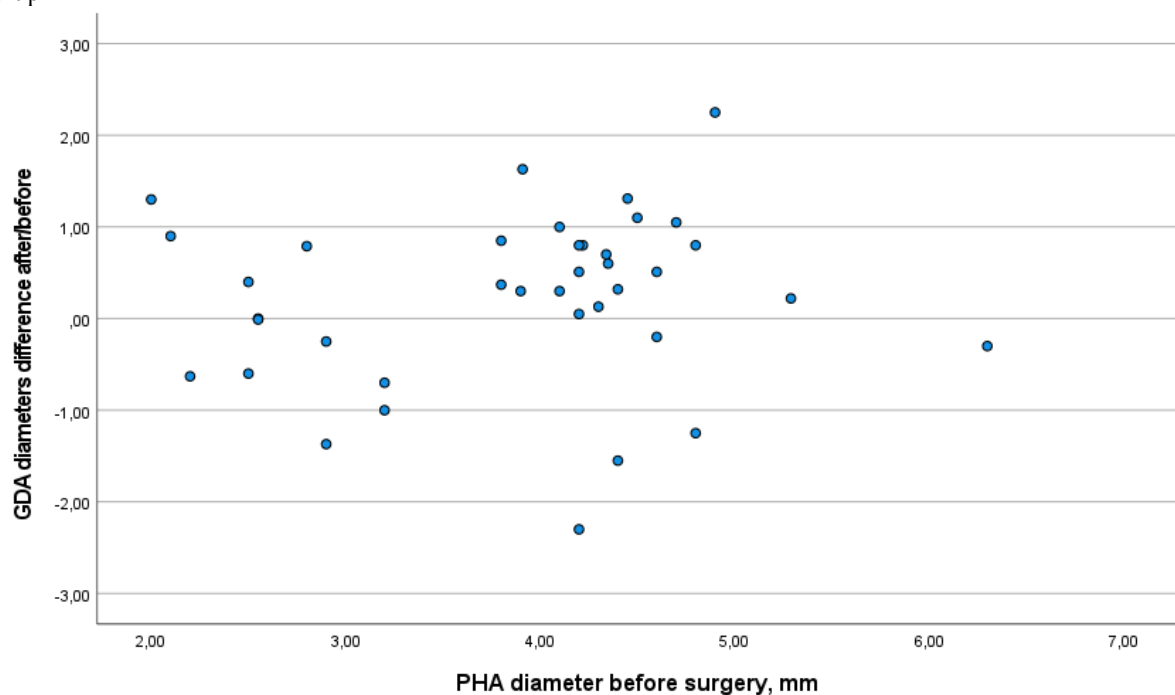

Graph

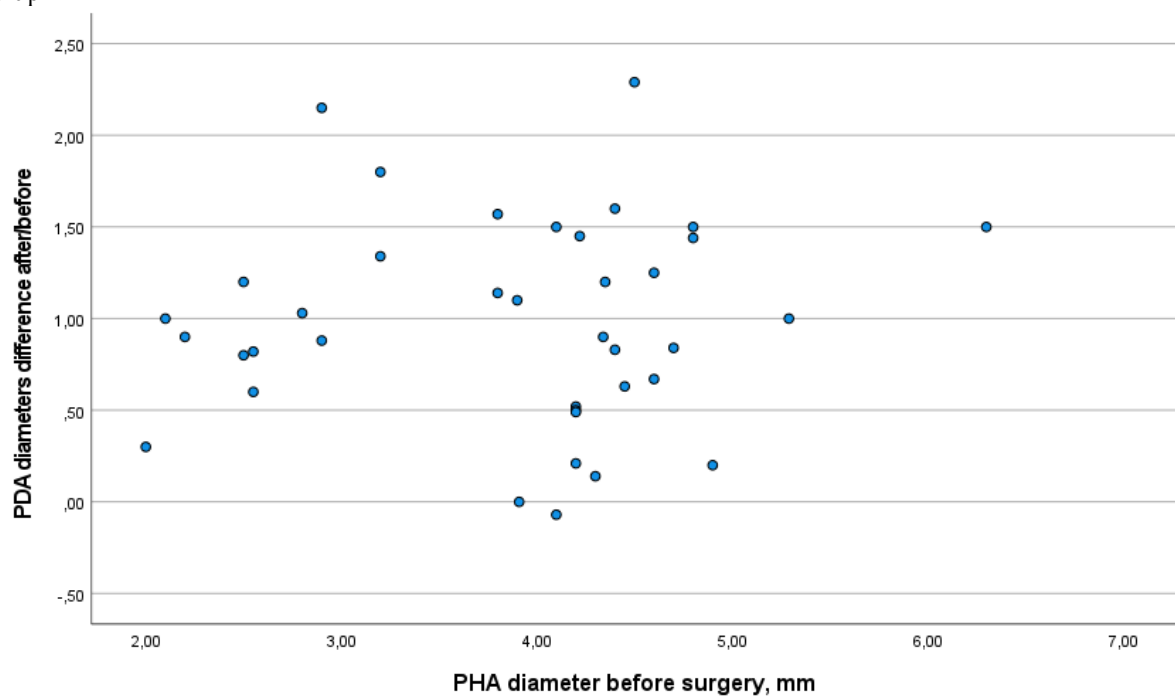

Graph

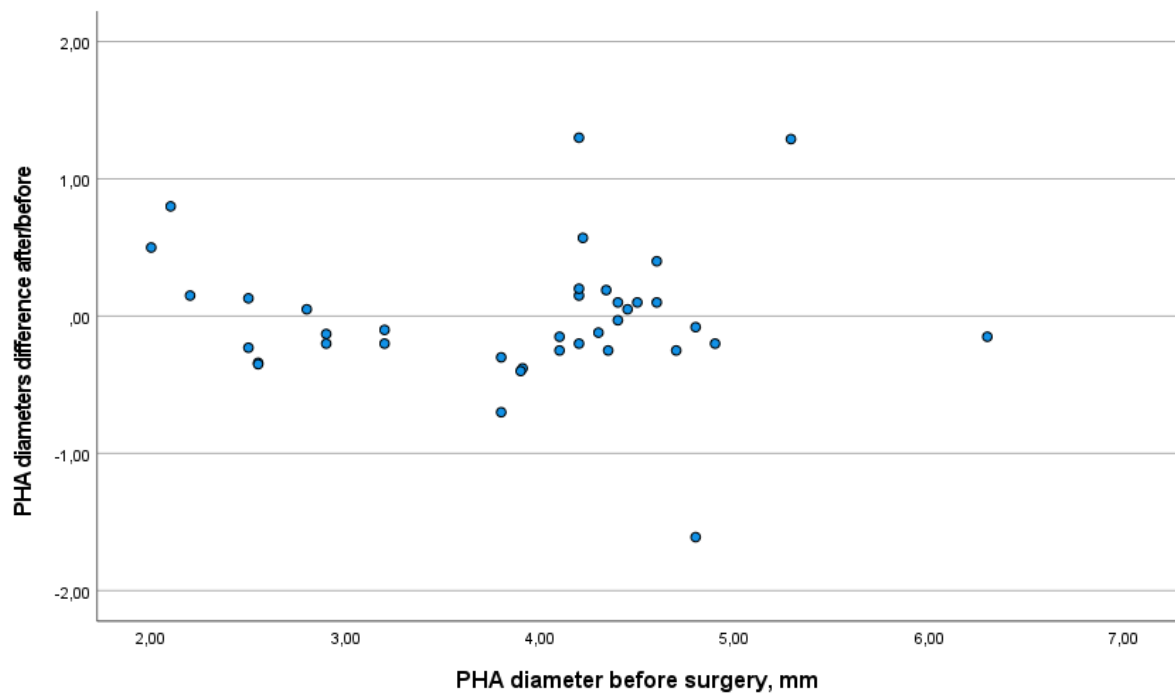

Graph

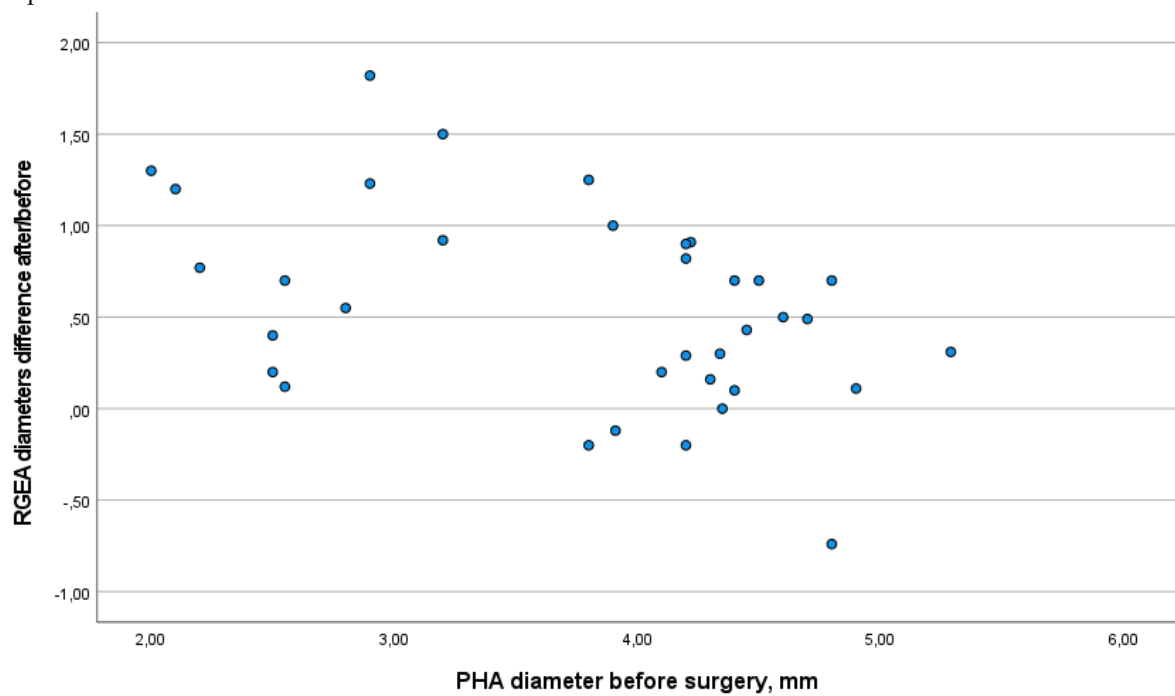

Correlations

| Correlations                                |                                                |                                                |                                                |                                                 |
|---------------------------------------------|------------------------------------------------|------------------------------------------------|------------------------------------------------|-------------------------------------------------|
| PHA<br>diameter<br>before<br>surgery.<br>mm | GDA<br>diameters<br>difference<br>after/before | PDA<br>diameters<br>difference<br>after/before | PHA<br>diameters<br>difference<br>after/before | RGEA<br>diameters<br>difference<br>after/before |

|                                        |  |                 |       |       |       |       |       |
|----------------------------------------|--|-----------------|-------|-------|-------|-------|-------|
| PHA diameter before surgery. mm        |  | Pearson         | 1     | .105  | .059  | -.032 | -.433 |
|                                        |  | Correlation     |       |       |       |       |       |
|                                        |  | Sig. (2-tailed) |       | .529  | .724  | .851  | .009  |
|                                        |  | N               | 38    | 38    | 38    | 38    | 35    |
| GDA diameters difference after/before  |  | Pearson         | .105  | 1     | -.187 | .176  | -.055 |
|                                        |  | Correlation     |       |       |       |       |       |
|                                        |  | Sig. (2-tailed) | .529  |       | .261  | .290  | .752  |
|                                        |  | N               | 38    | 38    | 38    | 38    | 35    |
| PDA diameters difference after/before  |  | Pearson         | .059  | -.187 | 1     | -.126 | .241  |
|                                        |  | Correlation     |       |       |       |       |       |
|                                        |  | Sig. (2-tailed) | .724  | .261  |       | .450  | .163  |
|                                        |  | N               | 38    | 38    | 38    | 38    | 35    |
| PHA diameters difference after/before  |  | Pearson         | -.032 | .176  | -.126 | 1     | .349  |
|                                        |  | Correlation     |       |       |       |       |       |
|                                        |  | Sig. (2-tailed) | .851  | .290  | .450  |       | .040  |
|                                        |  | N               | 38    | 38    | 38    | 38    | 35    |
| RGEA diameters difference after/before |  | Pearson         | -.433 | -.055 | .241  | .349  | 1     |
|                                        |  | Correlation     |       |       |       |       |       |
|                                        |  | Sig. (2-tailed) | .009  | .752  | .163  | .040  |       |
|                                        |  | N               | 35    | 35    | 35    | 35    | 35    |

#### Nonparametric Correlations

|                   |                                                |                      |                 | Correlations                                |                                                    |                                                    |                                                    |                                                     |
|-------------------|------------------------------------------------|----------------------|-----------------|---------------------------------------------|----------------------------------------------------|----------------------------------------------------|----------------------------------------------------|-----------------------------------------------------|
|                   |                                                |                      |                 | PHA<br>diameter<br>before<br>surgery.<br>mm | GDA<br>diameters<br>difference<br>after/befo<br>re | PDA<br>diameters<br>difference<br>after/befo<br>re | PHA<br>diameters<br>difference<br>after/befo<br>re | RGEA<br>diameters<br>difference<br>after/befor<br>e |
| Spearman's<br>rho | PHA<br>before<br>mm                            | diameter<br>surgery. | Correlation     | 1.000                                       | .132                                               | .099                                               | .056                                               | -.386                                               |
|                   |                                                |                      | Coefficient     |                                             |                                                    |                                                    |                                                    |                                                     |
|                   |                                                |                      | Sig. (2-tailed) | .                                           | .430                                               | .555                                               | .736                                               | .022                                                |
|                   |                                                |                      | N               | 38                                          | 38                                                 | 38                                                 | 38                                                 | 35                                                  |
|                   | GDA<br>diameters<br>difference<br>after/before |                      | Correlation     | .132                                        | 1.000                                              | -.166                                              | .057                                               | -.095                                               |
|                   |                                                |                      | Coefficient     |                                             |                                                    |                                                    |                                                    |                                                     |
|                   |                                                |                      | Sig. (2-tailed) | .430                                        | .                                                  | .318                                               | .732                                               | .587                                                |
|                   |                                                |                      | N               | 38                                          | 38                                                 | 38                                                 | 38                                                 | 35                                                  |
|                   | PDA<br>diameters<br>difference<br>after/before |                      | Correlation     | .099                                        | -.166                                              | 1.000                                              | -.002                                              | .255                                                |
|                   |                                                |                      | Coefficient     |                                             |                                                    |                                                    |                                                    |                                                     |
| Sig. (2-tailed)   |                                                |                      | .555            | .318                                        | .                                                  | .990                                               | .139                                               |                                                     |
| N                 |                                                |                      | 38              | 38                                          | 38                                                 | 38                                                 | 35                                                 |                                                     |
|                   |                                                |                      | Correlation     | .056                                        | .057                                               | -.002                                              | 1.000                                              | .235                                                |
|                   |                                                |                      | Coefficient     |                                             |                                                    |                                                    |                                                    |                                                     |

|                                        |                         |       |       |      |      |       |
|----------------------------------------|-------------------------|-------|-------|------|------|-------|
| PHA diameters difference after/before  | Sig. (2-tailed)         | .736  | .732  | .990 | .    | .174  |
|                                        | N                       | 38    | 38    | 38   | 38   | 35    |
| RGEA diameters difference after/before | Correlation Coefficient | -.386 | -.095 | .255 | .235 | 1.000 |
|                                        | Sig. (2-tailed)         | .022  | .587  | .139 | .174 | .     |
|                                        | N                       | 35    | 35    | 35   | 35   | 35    |

#### T-Test

| Group Statistics                                             |    |        |                |                 |  |
|--------------------------------------------------------------|----|--------|----------------|-----------------|--|
| Type of parenchimal blood flow                               | N  | Mean   | Std. Deviation | Std. Error Mean |  |
| GDA blood flow intensity alteration after/before collateral  | 12 | 1.4574 | .79469         | .22941          |  |
| main                                                         | 26 | 2.7957 | 4.86987        | .95506          |  |
| PDA blood flow intensity alteration after/before collateral  | 12 | 5.4721 | 2.72061        | .78537          |  |
| main                                                         | 26 | 8.1805 | 17.50659       | 3.43333         |  |
| PHA blood flow intensity alteration after/before collateral  | 12 | 1.4046 | 1.27309        | .36751          |  |
| main                                                         | 26 | 1.0835 | .37297         | .07315          |  |
| RGEA blood flow intensity alteration after/before collateral | 12 | 3.5111 | 3.04395        | .87871          |  |
| main                                                         | 23 | 3.5725 | 4.49047        | .93633          |  |
| GDA diameters ratio after/before collateral                  | 12 | 1.0631 | .17571         | .05072          |  |
| main                                                         | 26 | 1.1296 | .34891         | .06843          |  |
| PDA diameters ratio after/before collateral                  | 12 | 1.4979 | .18635         | .05379          |  |
| main                                                         | 26 | 1.4505 | .44903         | .08806          |  |
| PHA diameters ratio after/before collateral                  | 12 | 1.0003 | .18948         | .05470          |  |
| main                                                         | 26 | 1.0002 | .10093         | .01979          |  |
| RGEA diameters ratio after/before collateral                 | 12 | 1.2844 | .28779         | .08308          |  |
| main                                                         | 23 | 1.2608 | .30165         | .06290          |  |
| GDA diameters difference after/before collateral             | 12 | .2475  | .66501         | .19197          |  |
| main                                                         | 26 | .2254  | 1.04274        | .20450          |  |
| PDA diameters difference after/before collateral             | 12 | 1.1267 | .35758         | .10322          |  |
| main                                                         | 26 | .9115  | .62897         | .12335          |  |
| PHA diameters difference after/before collateral             | 12 | -.0208 | .71974         | .20777          |  |
| main                                                         | 26 | -.0112 | .36899         | .07237          |  |
| RGEA diameters difference after/before collateral            | 12 | .5175  | .54423         | .15711          |  |
| main                                                         | 23 | .5700  | .55288         | .11528          |  |

#### Independent Samples Test



|                                                      |       |                                   | Levene's Test for<br>Equality of<br>Variances |      | t-test for Equality of Means |            |                     |                        |                                 |                                                 |         |
|------------------------------------------------------|-------|-----------------------------------|-----------------------------------------------|------|------------------------------|------------|---------------------|------------------------|---------------------------------|-------------------------------------------------|---------|
|                                                      |       |                                   | F                                             | Sig. | t                            | df         | Sig. (2-<br>tailed) | Mean<br>Differe<br>nce | Std.<br>Error<br>Differe<br>nce | 95% Confidence<br>Interval of the<br>Difference |         |
|                                                      |       |                                   |                                               |      |                              |            |                     |                        |                                 | Lower                                           | Upper   |
| GDA<br>flow intensity<br>alteration<br>after/before  | blood | Equal<br>variances<br>assumed     | 2.139                                         | .152 | -.939                        | 36         | .354                | -<br>1.33825           | 1.42456                         | -<br>4.22739                                    | 1.55088 |
|                                                      |       | Equal<br>variances not<br>assumed |                                               |      | -<br>1.36<br>2               | 27.7<br>58 | .184                | -<br>1.33825           | .98223                          | -<br>3.35104                                    | .67453  |
| PDA<br>flow intensity<br>alteration<br>after/before  | blood | Equal<br>variances<br>assumed     | 1.853                                         | .182 | -.529                        | 36         | .600                | -<br>2.70841           | 5.11835                         | -<br>13.0889<br>1                               | 7.67209 |
|                                                      |       | Equal<br>variances not<br>assumed |                                               |      | -.769                        | 27.5<br>14 | .448                | -<br>2.70841           | 3.52201                         | -<br>9.92866                                    | 4.51185 |
| PHA<br>flow intensity<br>alteration<br>after/before  | blood | Equal<br>variances<br>assumed     | 5.773                                         | .022 | 1.19<br>6                    | 36         | .240                | .32109                 | .26848                          | -.22342                                         | .86559  |
|                                                      |       | Equal<br>variances not<br>assumed |                                               |      | .857                         | 11.8<br>81 | .408                | .32109                 | .37472                          | -.49626                                         | 1.13844 |
| RGEA<br>flow intensity<br>alteration<br>after/before | blood | Equal<br>variances<br>assumed     | .203                                          | .655 | -.042                        | 33         | .966                | -.06134                | 1.44789                         | -<br>3.00709                                    | 2.88440 |
|                                                      |       | Equal<br>variances not<br>assumed |                                               |      | -.048                        | 30.5<br>00 | .962                | -.06134                | 1.28407                         | -<br>2.68197                                    | 2.55928 |
| GDA<br>diameters<br>ratio<br>after/before            |       | Equal<br>variances<br>assumed     | 2.704                                         | .109 | -.622                        | 36         | .538                | -.06655                | .10698                          | -.28352                                         | .15043  |
|                                                      |       | Equal<br>variances not<br>assumed |                                               |      | -.781                        | 35.5<br>96 | .440                | -.06655                | .08518                          | -.23936                                         | .10627  |
| PDA<br>diameters                                     |       | Equal<br>variances<br>assumed     | 2.465                                         | .125 | .350                         | 36         | .728                | .04744                 | .13545                          | -.22726                                         | .32214  |

|                                                 |                                      |       |      |           |            |      |         |        |         |        |
|-------------------------------------------------|--------------------------------------|-------|------|-----------|------------|------|---------|--------|---------|--------|
| ratio<br>after/before                           | Equal<br>variances<br>not<br>assumed |       |      | .460      | 35.8<br>07 | .648 | .04744  | .10319 | -.16188 | .25676 |
| PHA<br>diameters<br>ratio<br>after/before       | Equal<br>variances<br>assumed        | 5.449 | .025 | .003      | 36         | .998 | .00013  | .04688 | -.09494 | .09521 |
|                                                 | Equal<br>variances<br>not<br>assumed |       |      | .002      | 13.9<br>64 | .998 | .00013  | .05817 | -.12466 | .12492 |
| RGEA<br>diameters<br>ratio<br>after/before      | Equal<br>variances<br>assumed        | .023  | .881 | .223      | 33         | .825 | .02356  | .10580 | -.19169 | .23881 |
|                                                 | Equal<br>variances<br>not<br>assumed |       |      | .226      | 23.3<br>83 | .823 | .02356  | .10420 | -.19180 | .23892 |
| GDA<br>diameters<br>difference<br>after/before  | Equal<br>variances<br>assumed        | 2.647 | .112 | .067      | 36         | .947 | .02212  | .32928 | -.64569 | .68992 |
|                                                 | Equal<br>variances<br>not<br>assumed |       |      | .079      | 31.9<br>99 | .938 | .02212  | .28049 | -.54922 | .59345 |
| PDA<br>diameters<br>difference<br>after/before  | Equal<br>variances<br>assumed        | 2.901 | .097 | 1.10<br>0 | 36         | .278 | .21513  | .19549 | -.18135 | .61161 |
|                                                 | Equal<br>variances<br>not<br>assumed |       |      | 1.33<br>8 | 34.1<br>80 | .190 | .21513  | .16084 | -.11168 | .54194 |
| PHA<br>diameters<br>difference<br>after/before  | Equal<br>variances<br>assumed        | 4.162 | .049 | -.055     | 36         | .956 | -.00968 | .17548 | -.36558 | .34622 |
|                                                 | Equal<br>variances<br>not<br>assumed |       |      | -.044     | 13.7<br>42 | .966 | -.00968 | .22001 | -.48239 | .46303 |
| RGEA<br>diameters<br>difference<br>after/before | Equal<br>variances<br>assumed        | .173  | .680 | -.268     | 33         | .790 | -.05250 | .19586 | -.45099 | .34599 |
|                                                 | Equal<br>variances<br>not<br>assumed |       |      | -.269     | 22.7<br>39 | .790 | -.05250 | .19487 | -.45587 | .35087 |

NPar Tests  
Mann-Whitney Test

**Ranks**

|                                                      |  |  | Type od parenchimal blood<br>flow | N  | Mean Rank | Sum of Ranks |
|------------------------------------------------------|--|--|-----------------------------------|----|-----------|--------------|
| GDA blood flow intencity<br>alteration after/before  |  |  | collateral                        | 12 | 18.25     | 219.00       |
|                                                      |  |  | main                              | 26 | 20.08     | 522.00       |
|                                                      |  |  | Total                             | 38 |           |              |
| PDA blood flow intencity<br>alteration after/before  |  |  | collateral                        | 12 | 22.75     | 273.00       |
|                                                      |  |  | main                              | 26 | 18.00     | 468.00       |
|                                                      |  |  | Total                             | 38 |           |              |
| PHA blood flow intencity<br>alteration after/before  |  |  | collateral                        | 12 | 20.42     | 245.00       |
|                                                      |  |  | main                              | 26 | 19.08     | 496.00       |
|                                                      |  |  | Total                             | 38 |           |              |
| RGEA blood flow intencity<br>alteration after/before |  |  | collateral                        | 12 | 19.33     | 232.00       |
|                                                      |  |  | main                              | 23 | 17.30     | 398.00       |
|                                                      |  |  | Total                             | 35 |           |              |
| GDA diameters ratio<br>after/before                  |  |  | collateral                        | 12 | 18.25     | 219.00       |
|                                                      |  |  | main                              | 26 | 20.08     | 522.00       |
|                                                      |  |  | Total                             | 38 |           |              |
| PDA diameters ratio<br>after/before                  |  |  | collateral                        | 12 | 22.75     | 273.00       |
|                                                      |  |  | main                              | 26 | 18.00     | 468.00       |
|                                                      |  |  | Total                             | 38 |           |              |
| PHA diameters ratio<br>after/before                  |  |  | collateral                        | 12 | 18.58     | 223.00       |
|                                                      |  |  | main                              | 26 | 19.92     | 518.00       |
|                                                      |  |  | Total                             | 38 |           |              |
| RGEA diameters ratio<br>after/before                 |  |  | collateral                        | 12 | 19.33     | 232.00       |
|                                                      |  |  | main                              | 23 | 17.30     | 398.00       |
|                                                      |  |  | Total                             | 35 |           |              |
| GDA diameters difference<br>after/before             |  |  | collateral                        | 12 | 19.33     | 232.00       |
|                                                      |  |  | main                              | 26 | 19.58     | 509.00       |
|                                                      |  |  | Total                             | 38 |           |              |
| PDA diameters difference<br>after/before             |  |  | collateral                        | 12 | 22.71     | 272.50       |
|                                                      |  |  | main                              | 26 | 18.02     | 468.50       |
|                                                      |  |  | Total                             | 38 |           |              |
| PHA diameters difference<br>after/before             |  |  | collateral                        | 12 | 18.63     | 223.50       |
|                                                      |  |  | main                              | 26 | 19.90     | 517.50       |
|                                                      |  |  | Total                             | 38 |           |              |
| RGEA diameters difference<br>after/before            |  |  | collateral                        | 12 | 18.08     | 217.00       |
|                                                      |  |  | main                              | 23 | 17.96     | 413.00       |
|                                                      |  |  | Total                             | 35 |           |              |

#### Test Statistics

|                                                      | Mann-Whitney<br>U | Wilcoxon W | Z      | Asymp. Sig. (2-<br>tailed) | Exact Sig. [2*(1-<br>tailed Sig.)] |
|------------------------------------------------------|-------------------|------------|--------|----------------------------|------------------------------------|
| GDA blood flow intensity<br>alteration after/before  | 141.000           | 219.000    | -.471  | .638                       | .653                               |
| PDA blood flow intensity<br>alteration after/before  | 117.000           | 468.000    | -1.225 | .221                       | .230                               |
| PHA blood flow intensity<br>alteration after/before  | 145.000           | 496.000    | -.345  | .730                       | .745                               |
| RGEA blood flow intensity<br>alteration after/before | 122.000           | 398.000    | -.556  | .578                       | .595                               |
| GDA diameters ratio<br>after/before                  | 141.000           | 219.000    | -.471  | .638                       | .653                               |
| PDA diameters ratio<br>after/before                  | 117.000           | 468.000    | -1.225 | .221                       | .230                               |
| PHA diameters ratio<br>after/before                  | 145.000           | 223.000    | -.345  | .730                       | .745                               |
| RGEA diameters ratio<br>after/before                 | 122.000           | 398.000    | -.556  | .578                       | .595                               |
| GDA diameters difference<br>after/before             | 154.000           | 232.000    | -.063  | .950                       | .963                               |
| PDA diameters difference<br>after/before             | 117.500           | 468.500    | -1.210 | .226                       | .230                               |
| PHA diameters difference<br>after/before             | 145.500           | 223.500    | -.330  | .741                       | .745                               |
| RGEA diameters difference<br>after/before            | 137.000           | 413.000    | -.035  | .972                       | .986                               |

#### Crosstabs

##### Case Processing Summary

|                                                       | Valid |         | Missing |         | Total |         |
|-------------------------------------------------------|-------|---------|---------|---------|-------|---------|
|                                                       | N     | Percent | N       | Percent | N     | Percent |
| Puls preservation * Type od<br>parenchimal blood flow | 38    | 100.0%  | 0       | 0.0%    | 38    | 100.0%  |

##### Puls preservation \* Type od parenchimal blood flow Crosstabulation

|                   |     | Type od parenchimal blood flow             |                | Total           |
|-------------------|-----|--------------------------------------------|----------------|-----------------|
|                   |     | collateral                                 | main           |                 |
| Puls preservation | no  | Count                                      | 4 <sup>a</sup> | 0 <sup>b</sup>  |
|                   |     | % within Type od<br>parenchimal blood flow | 33.3%          | 0.0%            |
|                   | yes | Count                                      | 8 <sup>a</sup> | 26 <sup>b</sup> |
|                   |     |                                            |                | 34              |

|       |                        |        |        |        |
|-------|------------------------|--------|--------|--------|
|       | % within Type od       | 66.7%  | 100.0% | 89.5%  |
|       | parenchimal blood flow |        |        |        |
| Total | Count                  | 12     | 26     | 38     |
|       | % within Type od       | 100.0% | 100.0% | 100.0% |
|       | parenchimal blood flow |        |        |        |

#### Chi-Square Tests

|                                 | Value  | df | Asymptotic<br>Significance (2-<br>sided) | Exact Sig. (2-<br>sided) | Exact Sig. (1-<br>sided) |
|---------------------------------|--------|----|------------------------------------------|--------------------------|--------------------------|
| Pearson Chi-Square              | 9.686  | 1  | .002                                     |                          |                          |
| Continuity Correction           | 6.470  | 1  | .011                                     |                          |                          |
| Likelihood Ratio                | 10.297 | 1  | .001                                     |                          |                          |
| Fisher's Exact Test             |        |    |                                          | .007                     | .007                     |
| Linear-by-Linear<br>Association | 9.431  | 1  | .002                                     |                          |                          |
| N of Valid Cases                | 38     |    |                                          |                          |                          |

#### T-Test

#### Group Statistics

|                            | Puls preservation | N  | Mean   | Std. Deviation | Std. Error Mean |
|----------------------------|-------------------|----|--------|----------------|-----------------|
| Linear blood flow velocity | no                | 4  | -48.25 | 32.212         | 16.106          |
| decrease.%                 | yes               | 34 | -18.09 | 15.044         | 2.580           |

#### Independent Samples Test

|                                       |                             | Levene's Test for<br>Equality of<br>Variances |      | t-test for Equality of Means |       |                     |                        |                                 |                                                 |         |
|---------------------------------------|-----------------------------|-----------------------------------------------|------|------------------------------|-------|---------------------|------------------------|---------------------------------|-------------------------------------------------|---------|
|                                       |                             | F                                             | Sig. | t                            | df    | Sig. (2-<br>tailed) | Mean<br>Differe<br>nce | Std.<br>Error<br>Differe<br>nce | 95% Confidence<br>Interval of the<br>Difference |         |
| Linear blood flow velocity decrease.% | Equal variances assumed     | 5.853                                         | .021 | -3.328                       | 36    | .002                | -30.162                | 9.062                           | -48.541                                         | -11.782 |
|                                       | Equal variances not assumed |                                               |      | -1.849                       | 3.156 | .157                | -30.162                | 16.311                          | -80.651                                         | 20.328  |

#### NPar Tests

#### Mann-Whitney Test

#### Ranks

|                                        | Puls preservation | N  | Mean Rank | Sum of Ranks |
|----------------------------------------|-------------------|----|-----------|--------------|
| Linear blood flow velocity decrease. % | no                | 4  | 10.38     | 41.50        |
|                                        | yes               | 34 | 20.57     | 699.50       |
|                                        | Total             | 38 |           |              |

#### Test Statistics

|                                        |        |
|----------------------------------------|--------|
| Linear blood flow velocity decrease. % |        |
| Mann-Whitney U                         | 31.500 |
| Wilcoxon W                             | 41.500 |
| Z                                      | -1.741 |
| Asymp. Sig. (2-tailed)                 | .082   |
| Exact Sig. [2*(1-tailed Sig.)]         | .083   |

#### T-Test

| Group Statistics                                  |    |        |                |                 |
|---------------------------------------------------|----|--------|----------------|-----------------|
| Type of blood flow                                | N  | Mean   | Std. Deviation | Std. Error Mean |
| Linear blood flow velocity decrease. % collateral | 12 | -42.58 | 18.696         | 5.397           |
| main                                              | 26 | -11.42 | 8.990          | 1.763           |

#### Independent Samples Test

|                                        |                             | Levene's Test for Equality of Variances |      | t-test for Equality of Means |        |                 |                 |                       |                                           |         |
|----------------------------------------|-----------------------------|-----------------------------------------|------|------------------------------|--------|-----------------|-----------------|-----------------------|-------------------------------------------|---------|
|                                        |                             | F                                       | Sig. | t                            | df     | Sig. (2-tailed) | Mean Difference | Std. Error Difference | 95% Confidence Interval of the Difference |         |
| Linear blood flow velocity decrease. % | Equal variances assumed     | 5.175                                   | .029 | -6.995                       | 36     | .000            | -31.160         | 4.455                 | -40.195                                   | -22.126 |
|                                        | Equal variances not assumed |                                         |      | -5.488                       | 13.406 | .000            | -31.160         | 5.678                 | -43.389                                   | -18.932 |
|                                        |                             |                                         |      |                              | 8      |                 |                 |                       |                                           |         |

#### NPar Tests

##### Mann-Whitney Test

#### Ranks

| Type of blood flow | N | Mean Rank | Sum of Ranks |
|--------------------|---|-----------|--------------|
|--------------------|---|-----------|--------------|

|                                        |            |    |       |        |
|----------------------------------------|------------|----|-------|--------|
| Linear blood flow velocity decrease. % | collateral | 12 | 8.63  | 103.50 |
|                                        | main       | 26 | 24.52 | 637.50 |
|                                        | Total      | 38 |       |        |

Test Statistics

|                                |                                        |
|--------------------------------|----------------------------------------|
|                                | Linear blood flow velocity decrease. % |
| Mann-Whitney U                 | 25.500                                 |
| Wilcoxon W                     | 103.500                                |
| Z                              | -4.109                                 |
| Asymp. Sig. (2-tailed)         | .000                                   |
| Exact Sig. [2*(1-tailed Sig.)] | .000                                   |

Graph

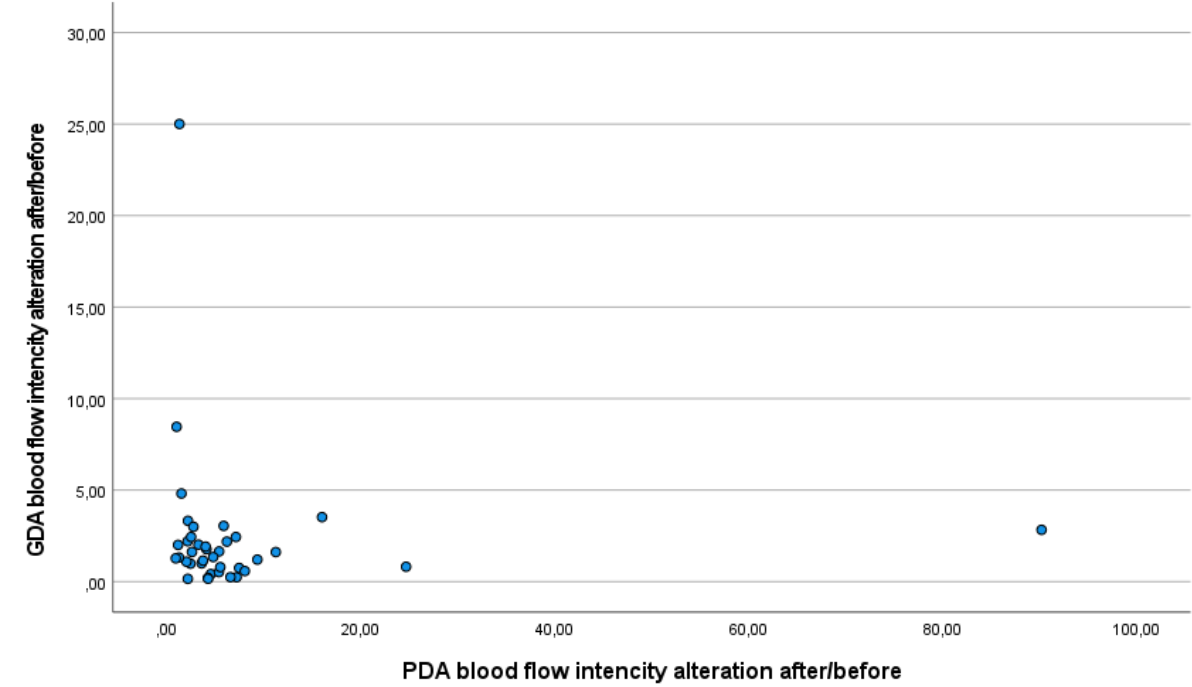

Graph

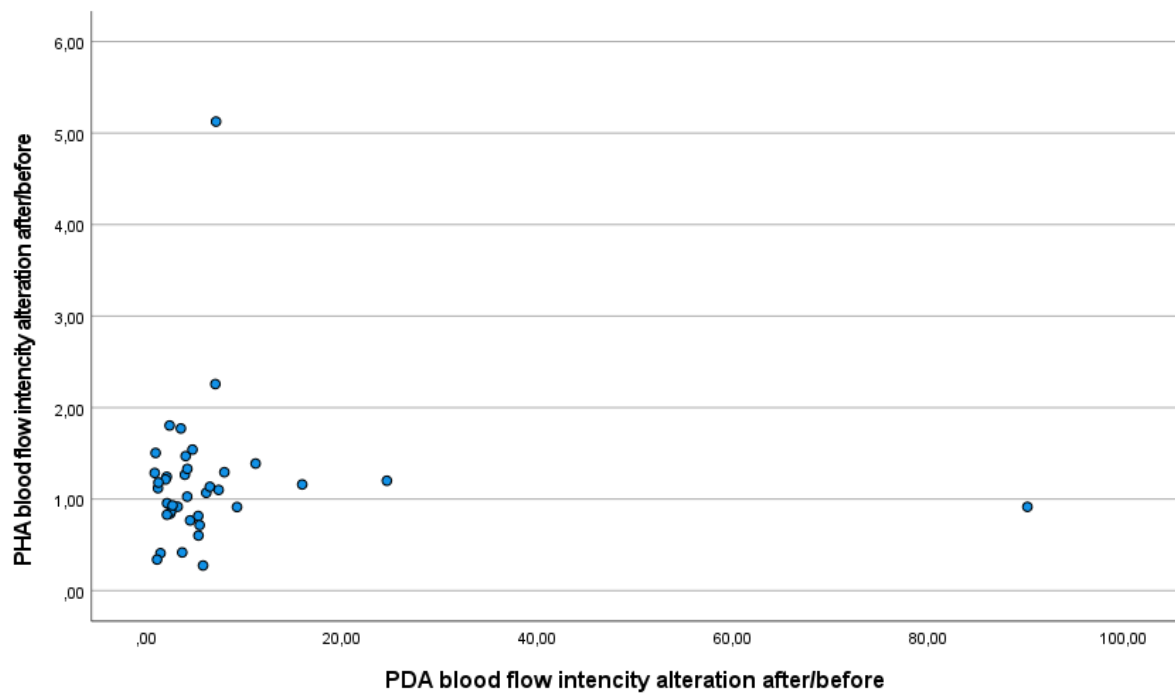

Graph

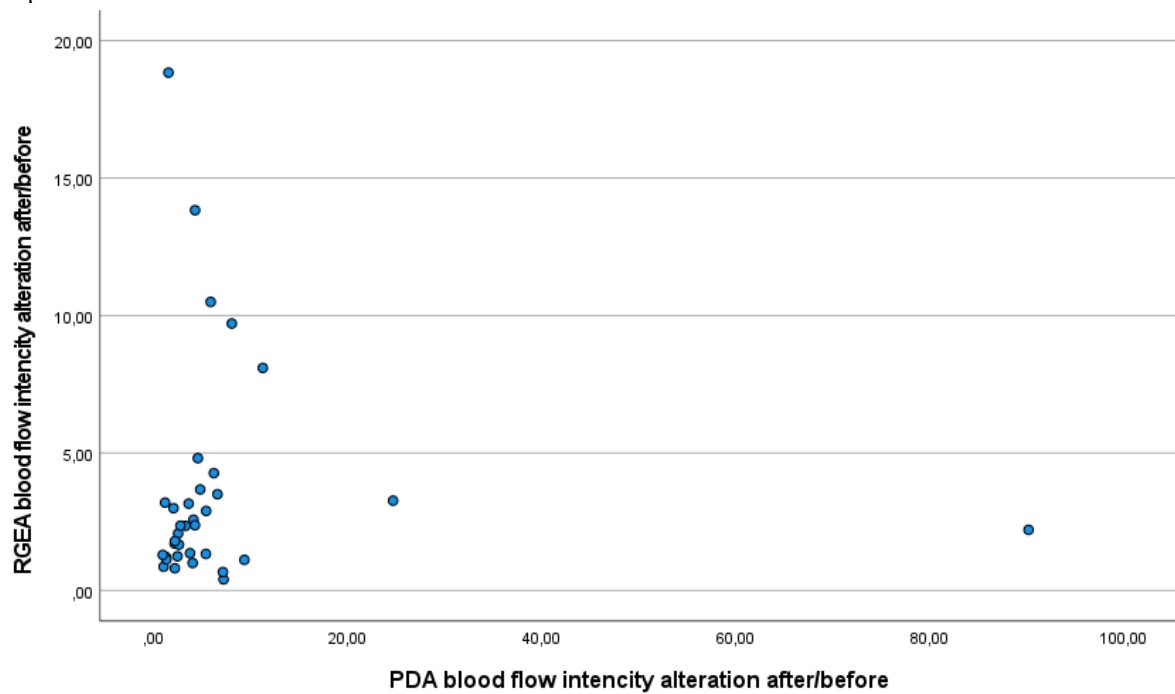

Correlations

| Correlations        |                                                           |                                                           |                                                           |                                                            |
|---------------------|-----------------------------------------------------------|-----------------------------------------------------------|-----------------------------------------------------------|------------------------------------------------------------|
|                     | GDA blood<br>flow intensity<br>alteration<br>after/before | PDA blood<br>flow intensity<br>alteration<br>after/before | PHA blood<br>flow intensity<br>alteration<br>after/before | RGEA blood<br>flow intensity<br>alteration<br>after/before |
| Pearson Correlation | 1                                                         | -.042                                                     | -.057                                                     | -.057                                                      |
| Sig. (2-tailed)     |                                                           | .800                                                      | .735                                                      | .744                                                       |



|              |       |            |                     |       |       |       |       |
|--------------|-------|------------|---------------------|-------|-------|-------|-------|
| GDA          | blood | flow       | N                   | 38    | 38    | 38    | 35    |
| intensity    |       | alteration |                     |       |       |       |       |
| after/before |       |            |                     |       |       |       |       |
| PDA          | blood | flow       | Pearson Correlation | -.042 | 1     | -.015 | -.033 |
| intensity    |       | alteration | Sig. (2-tailed)     | .800  |       | .926  | .851  |
| after/before |       |            | N                   | 38    | 38    | 38    | 35    |
| PHA          | blood | flow       | Pearson Correlation | -.057 | -.015 | 1     | -.246 |
| intensity    |       | alteration | Sig. (2-tailed)     | .735  | .926  |       | .155  |
| after/before |       |            | N                   | 38    | 38    | 38    | 35    |
| RGEA         | blood | flow       | Pearson Correlation | -.057 | -.033 | -.246 | 1     |
| intensity    |       | alteration | Sig. (2-tailed)     | .744  | .851  | .155  |       |
| after/before |       |            | N                   | 35    | 35    | 35    | 35    |

#### Nonparametric Correlations

|                   |      |       |      | Correlations                                                 |                                                              |                                                              |                                                               |
|-------------------|------|-------|------|--------------------------------------------------------------|--------------------------------------------------------------|--------------------------------------------------------------|---------------------------------------------------------------|
|                   |      |       |      | GDA blood<br>flow<br>intensity<br>alteration<br>after/before | PDA blood<br>flow<br>intensity<br>alteration<br>after/before | PHA blood<br>flow<br>intensity<br>alteration<br>after/before | RGEA<br>blood flow<br>intensity<br>alteration<br>after/before |
| Spearman's<br>rho | GDA  | blood | flow | Correlation                                                  | 1.000                                                        | -.246                                                        | -.109                                                         |
|                   |      |       |      | Coefficient                                                  |                                                              |                                                              |                                                               |
|                   |      |       |      | Sig. (2-tailed)                                              | .                                                            | .137                                                         | .515                                                          |
|                   |      |       |      | N                                                            | 38                                                           | 38                                                           | 35                                                            |
|                   | PDA  | blood | flow | Correlation                                                  | -.246                                                        | 1.000                                                        | .072                                                          |
|                   |      |       |      | Coefficient                                                  |                                                              |                                                              |                                                               |
|                   |      |       |      | Sig. (2-tailed)                                              | .137                                                         | .                                                            | .669                                                          |
|                   |      |       |      | N                                                            | 38                                                           | 38                                                           | 35                                                            |
|                   | PHA  | blood | flow | Correlation                                                  | -.109                                                        | .072                                                         | 1.000                                                         |
|                   |      |       |      | Coefficient                                                  |                                                              |                                                              |                                                               |
|                   |      |       |      | Sig. (2-tailed)                                              | .515                                                         | .669                                                         | .                                                             |
|                   |      |       |      | N                                                            | 38                                                           | 38                                                           | 35                                                            |
|                   | RGEA | blood | flow | Correlation                                                  | -.057                                                        | .268                                                         | -.198                                                         |
|                   |      |       |      | Coefficient                                                  |                                                              |                                                              |                                                               |
|                   |      |       |      | Sig. (2-tailed)                                              | .746                                                         | .120                                                         | .254                                                          |
|                   |      |       |      | N                                                            | 35                                                           | 35                                                           | 35                                                            |

#### T-Test

| Group Statistics |    |        |                |                 |
|------------------|----|--------|----------------|-----------------|
| Type             | N  | Mean   | Std. Deviation | Std. Error Mean |
| classical        | 30 | 2.4920 | 4.53800        | .82852          |

|                                                   |           |    |        |          |         |
|---------------------------------------------------|-----------|----|--------|----------|---------|
| GDA blood flow intencity alteration after/before  | aberrant  | 8  | 1.9273 | 1.47923  | .52299  |
| PDA blood flow intencity alteration after/before  | classical | 30 | 8.1891 | 16.26124 | 2.96888 |
|                                                   | aberrant  | 8  | 4.0855 | 2.03198  | .71841  |
| PHA blood flow intencity alteration after/before  | classical | 30 | 1.3255 | .80462   | .14690  |
|                                                   | aberrant  | 8  | .6580  | .28386   | .10036  |
| RGEA blood flow intencity alteration after/before | classical | 28 | 2.8460 | 2.97509  | .56224  |
|                                                   | aberrant  | 7  | 6.3733 | 6.28371  | 2.37502 |
| GDA diameters ratio after/before                  | classical | 30 | 1.1064 | .32319   | .05901  |
|                                                   | aberrant  | 8  | 1.1170 | .23592   | .08341  |
| PDA diameters ratio after/before                  | classical | 30 | 1.4877 | .41716   | .07616  |
|                                                   | aberrant  | 8  | 1.3821 | .21514   | .07606  |
| PHA diameters ratio after/before                  | classical | 30 | .9614  | .09914   | .01810  |
|                                                   | aberrant  | 8  | 1.1458 | .14627   | .05171  |
| RGEA diameters ratio after/before                 | classical | 28 | 1.2165 | .25541   | .04827  |
|                                                   | aberrant  | 7  | 1.4785 | .35862   | .13554  |
| GDA diameters difference after/before             | classical | 30 | .1983  | .98412   | .17967  |
|                                                   | aberrant  | 8  | .3600  | .73681   | .26050  |
| PDA diameters difference after/before             | classical | 30 | 1.0113 | .58668   | .10711  |
|                                                   | aberrant  | 8  | .8600  | .47059   | .16638  |
| PHA diameters difference after/before             | classical | 30 | -.1297 | .44713   | .08163  |
|                                                   | aberrant  | 8  | .4187  | .44809   | .15842  |
| RGEA diameters difference after/before            | classical | 28 | .4986  | .56314   | .10642  |
|                                                   | aberrant  | 7  | .7657  | .41689   | .15757  |

### Independent Samples Test

|                                                  |                             |  | Levene's Test for Equality of Variances |      | t-test for Equality of Means |        |                 |                 |                       |                                                          |
|--------------------------------------------------|-----------------------------|--|-----------------------------------------|------|------------------------------|--------|-----------------|-----------------|-----------------------|----------------------------------------------------------|
|                                                  |                             |  | F                                       | Sig. | t                            | df     | Sig. (2-tailed) | Mean Difference | Std. Error Difference | 95% Confidence Interval of the Difference<br>Lower Upper |
| GDA blood flow intencity alteration after/before | Equal variances assumed     |  | .473                                    | .496 | .344                         | 36     | .733            | .56472          | 1.64134               | - 2.76407                                                |
|                                                  | Equal variances not assumed |  |                                         |      | .576                         | 34.212 | .568            | .56472          | .97978                | - 1.42598                                                |

|              |           |               |       |      |       |      |      |         |         |         |         |
|--------------|-----------|---------------|-------|------|-------|------|------|---------|---------|---------|---------|
| PDA          | blood     | Equal         | 1.185 | .284 | .705  | 36   | .485 | 4.10364 | 5.81841 | -       | 15.9039 |
| flow         | intensity | variances     |       |      |       |      |      |         |         | 7.69665 | 2       |
| alteration   |           | assumed       |       |      |       |      |      |         |         |         |         |
| after/before |           | Equal         |       |      | 1.34  | 32.0 | .189 | 4.10364 | 3.05457 | -       | 10.3252 |
|              |           | variances not |       |      | 3     | 40   |      |         |         | 2.11801 | 8       |
|              |           | assumed       |       |      |       |      |      |         |         |         |         |
| PHA          | blood     | Equal         | .544  | .466 | 2.28  | 36   | .028 | .66744  | .29164  | .07596  | 1.25892 |
| flow         | intensity | variances     |       |      | 9     |      |      |         |         |         |         |
| alteration   |           | assumed       |       |      |       |      |      |         |         |         |         |
| after/before |           | Equal         |       |      | 3.75  | 32.7 | .001 | .66744  | .17791  | .30539  | 1.02949 |
|              |           | variances not |       |      | 1     | 93   |      |         |         |         |         |
|              |           | assumed       |       |      |       |      |      |         |         |         |         |
| RGEA         | blood     | Equal         | 6.969 | .013 | -     | 33   | .035 | -       | 1.60473 | -       | -.26246 |
| flow         | intensity | variances     |       |      | 2.19  |      |      | 3.52731 |         | 6.79217 |         |
| alteration   |           | assumed       |       |      | 8     |      |      |         |         |         |         |
| after/before |           | Equal         |       |      | -     | 6.68 | .194 | -       | 2.44066 | -       | 2.29921 |
|              |           | variances not |       |      | 1.44  | 7    |      | 3.52731 |         | 9.35384 |         |
|              |           | assumed       |       |      | 5     |      |      |         |         |         |         |
| GDA          |           | Equal         | .129  | .721 | -.086 | 36   | .932 | -.01058 | .12262  | -.25927 | .23811  |
| diameters    |           | variances     |       |      |       |      |      |         |         |         |         |
| ratio        |           | assumed       |       |      |       |      |      |         |         |         |         |
| after/before |           | Equal         |       |      | -.104 | 14.8 | .919 | -.01058 | .10217  | -.22853 | .20737  |
|              |           | variances not |       |      |       | 61   |      |         |         |         |         |
|              |           | assumed       |       |      |       |      |      |         |         |         |         |
| PDA          |           | Equal         | .844  | .364 | .687  | 36   | .496 | .10560  | .15369  | -.20610 | .41731  |
| diameters    |           | variances     |       |      |       |      |      |         |         |         |         |
| ratio        |           | assumed       |       |      |       |      |      |         |         |         |         |
| after/before |           | Equal         |       |      | .981  | 22.5 | .337 | .10560  | .10764  | -.11729 | .32850  |
|              |           | variances not |       |      |       | 91   |      |         |         |         |         |
|              |           | assumed       |       |      |       |      |      |         |         |         |         |
| PHA          |           | Equal         | 4.604 | .039 | -     | 36   | .000 | -.18442 | .04373  | -.27311 | -.09573 |
| diameters    |           | variances     |       |      | 4.21  |      |      |         |         |         |         |
| ratio        |           | assumed       |       |      | 7     |      |      |         |         |         |         |
| after/before |           | Equal         |       |      | -     | 8.78 | .009 | -.18442 | .05479  | -.30882 | -.06002 |
|              |           | variances not |       |      | 3.36  | 8    |      |         |         |         |         |
|              |           | assumed       |       |      | 6     |      |      |         |         |         |         |
| RGEA         |           | Equal         | 1.090 | .304 | -     | 33   | .032 | -.26196 | .11707  | -.50016 | -.02377 |
| diameters    |           | variances     |       |      | 2.23  |      |      |         |         |         |         |
| ratio        |           | assumed       |       |      | 8     |      |      |         |         |         |         |
| after/before |           | Equal         |       |      | -     | 7.59 | .108 | -.26196 | .14388  | -.59690 | .07297  |
|              |           | variances not |       |      | 1.82  | 1    |      |         |         |         |         |
|              |           | assumed       |       |      | 1     |      |      |         |         |         |         |

|              |               |      |      |       |      |      |         |        |         |         |
|--------------|---------------|------|------|-------|------|------|---------|--------|---------|---------|
| GDA          | Equal         | .182 | .672 | -.432 | 36   | .669 | -.16167 | .37449 | -.92116 | .59783  |
| diameters    | variances     |      |      |       |      |      |         |        |         |         |
| difference   | assumed       |      |      |       |      |      |         |        |         |         |
| after/before | Equal         |      |      | -.511 | 14.4 | .617 | -.16167 | .31645 | -.83840 | .51506  |
|              | variances not |      |      |       | 55   |      |         |        |         |         |
|              | assumed       |      |      |       |      |      |         |        |         |         |
| PDA          | Equal         | .337 | .565 | .672  | 36   | .506 | .15133  | .22521 | -.30541 | .60807  |
| diameters    | variances     |      |      |       |      |      |         |        |         |         |
| difference   | assumed       |      |      |       |      |      |         |        |         |         |
| after/before | Equal         |      |      | .765  | 13.4 | .458 | .15133  | .19788 | -.27471 | .57738  |
|              | variances not |      |      |       | 47   |      |         |        |         |         |
|              | assumed       |      |      |       |      |      |         |        |         |         |
| PHA          | Equal         | .281 | .599 | -     | 36   | .004 | -.54842 | .17799 | -.90940 | -.18743 |
| diameters    | variances     |      |      | 3.08  |      |      |         |        |         |         |
| difference   | assumed       |      |      | 1     |      |      |         |        |         |         |
| after/before | Equal         |      |      | -     | 11.0 | .010 | -.54842 | .17822 | -.94057 | -.15626 |
|              | variances not |      |      | 3.07  | 23   |      |         |        |         |         |
|              | assumed       |      |      | 7     |      |      |         |        |         |         |
| RGEA         | Equal         | .757 | .391 | -     | 33   | .250 | -.26714 | .22798 | -.73098 | .19669  |
| diameters    | variances     |      |      | 1.17  |      |      |         |        |         |         |
| difference   | assumed       |      |      | 2     |      |      |         |        |         |         |
| after/before | Equal         |      |      | -     | 12.1 | .185 | -.26714 | .19014 | -.68082 | .14653  |
|              | variances not |      |      | 1.40  | 60   |      |         |        |         |         |
|              | assumed       |      |      | 5     |      |      |         |        |         |         |

#### NPar Tests

##### Mann-Whitney Test

| Ranks                                             |           |    |           |              |
|---------------------------------------------------|-----------|----|-----------|--------------|
|                                                   | Type      | N  | Mean Rank | Sum of Ranks |
| GDA blood flow intensity alteration after/before  | classical | 30 | 19.20     | 576.00       |
|                                                   | aberrant  | 8  | 20.63     | 165.00       |
|                                                   | Total     | 38 |           |              |
| PDA blood flow intensity alteration after/before  | classical | 30 | 19.73     | 592.00       |
|                                                   | aberrant  | 8  | 18.63     | 149.00       |
|                                                   | Total     | 38 |           |              |
| PHA blood flow intensity alteration after/before  | classical | 30 | 22.83     | 685.00       |
|                                                   | aberrant  | 8  | 7.00      | 56.00        |
|                                                   | Total     | 38 |           |              |
| RGEA blood flow intensity alteration after/before | classical | 28 | 16.21     | 454.00       |
|                                                   | aberrant  | 7  | 25.14     | 176.00       |
|                                                   | Total     | 35 |           |              |
|                                                   | classical | 30 | 19.20     | 576.00       |

|              |           |            |           |    |       |        |
|--------------|-----------|------------|-----------|----|-------|--------|
| GDA          | diameters | ratio      | aberrant  | 8  | 20.63 | 165.00 |
| after/before |           |            | Total     | 38 |       |        |
| PDA          | diameters | ratio      | classical | 30 | 19.73 | 592.00 |
| after/before |           |            | aberrant  | 8  | 18.63 | 149.00 |
|              |           |            | Total     | 38 |       |        |
| PHA          | diameters | ratio      | classical | 30 | 16.17 | 485.00 |
| after/before |           |            | aberrant  | 8  | 32.00 | 256.00 |
|              |           |            | Total     | 38 |       |        |
| RGEA         | diameters | ratio      | classical | 28 | 16.21 | 454.00 |
| after/before |           |            | aberrant  | 7  | 25.14 | 176.00 |
|              |           |            | Total     | 35 |       |        |
| GDA          | diameters | difference | classical | 30 | 19.02 | 570.50 |
| after/before |           |            | aberrant  | 8  | 21.31 | 170.50 |
|              |           |            | Total     | 38 |       |        |
| PDA          | diameters | difference | classical | 30 | 19.92 | 597.50 |
| after/before |           |            | aberrant  | 8  | 17.94 | 143.50 |
|              |           |            | Total     | 38 |       |        |
| PHA          | diameters | difference | classical | 30 | 16.40 | 492.00 |
| after/before |           |            | aberrant  | 8  | 31.13 | 249.00 |
|              |           |            | Total     | 38 |       |        |
| RGEA         | diameters | difference | classical | 28 | 16.89 | 473.00 |
| after/before |           |            | aberrant  | 7  | 22.43 | 157.00 |
|              |           |            | Total     | 35 |       |        |

| Test Statistics |                      |       |              |            |        |                                |
|-----------------|----------------------|-------|--------------|------------|--------|--------------------------------|
|                 |                      |       | Mann-Whitney |            |        |                                |
|                 |                      |       | U            | Wilcoxon W | Z      | Asymp. Sig. (2-tailed)         |
|                 |                      |       |              |            |        | Exact Sig. [2*(1-tailed Sig.)] |
| GDA             | blood flow intensity |       | 111.000      | 576.000    | -.322  | .747                           |
| alteration      | after/before         |       |              |            |        | .765                           |
| PDA             | blood flow intensity |       | 113.000      | 149.000    | -.251  | .802                           |
| alteration      | after/before         |       |              |            |        | .820                           |
| PHA             | blood flow intensity |       | 20.000       | 56.000     | -3.581 | .000                           |
| alteration      | after/before         |       |              |            |        | .000                           |
| RGEA            | blood flow intensity |       | 48.000       | 454.000    | -2.062 | .039                           |
| alteration      | after/before         |       |              |            |        | .039                           |
| GDA             | diameters            | ratio | 111.000      | 576.000    | -.322  | .747                           |
| after/before    |                      |       |              |            |        | .765                           |
| PDA             | diameters            | ratio | 113.000      | 149.000    | -.251  | .802                           |
| after/before    |                      |       |              |            |        | .820                           |
| PHA             | diameters            | ratio | 20.000       | 485.000    | -3.581 | .000                           |
| after/before    |                      |       |              |            |        | .000                           |

|              |           |            |         |         |        |      |      |
|--------------|-----------|------------|---------|---------|--------|------|------|
| RGEA         | diameters | ratio      | 48.000  | 454.000 | -2.062 | .039 | .039 |
| after/before |           |            |         |         |        |      |      |
| GDA          | diameters | difference | 105.500 | 570.500 | -.519  | .604 | .610 |
| after/before |           |            |         |         |        |      |      |
| PDA          | diameters | difference | 107.500 | 143.500 | -.448  | .654 | .661 |
| after/before |           |            |         |         |        |      |      |
| PHA          | diameters | difference | 27.000  | 492.000 | -3.334 | .001 | .000 |
| after/before |           |            |         |         |        |      |      |
| RGEA         | diameters | difference | 67.000  | 473.000 | -1.279 | .201 | .214 |
| after/before |           |            |         |         |        |      |      |
