# Supplementary material for: Hemodynamic, Surgical and Oncological Outcomes of 40 Distal Pancreatectomies with Celiac and Left Gastric Arteries Resection (DP CAR) without Arterial Reconstructions and Preoperative Embolization
Source: MDPI journal article supplement (doi:10.3390/cancers14051254), 2022-02-28
Supplement: s1 [file s1]

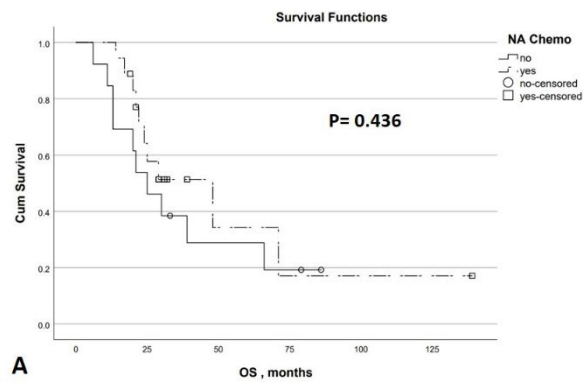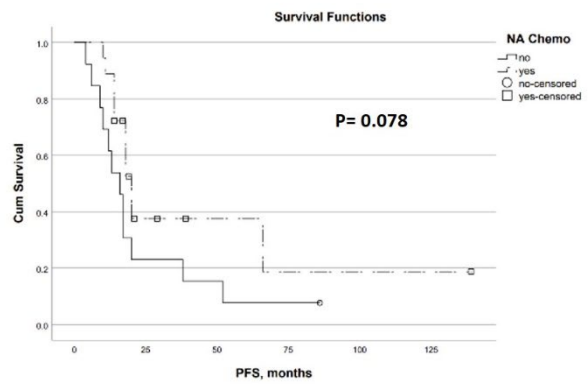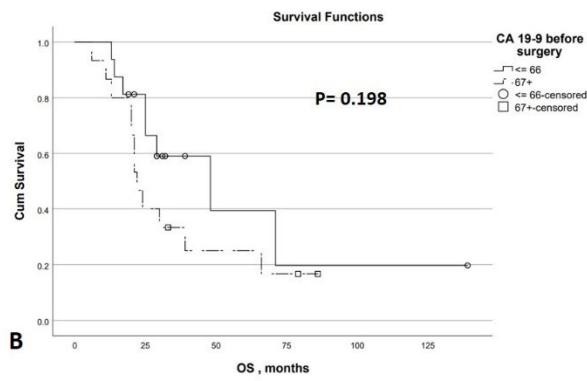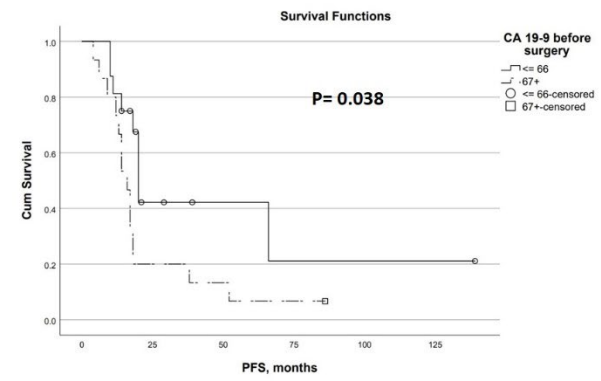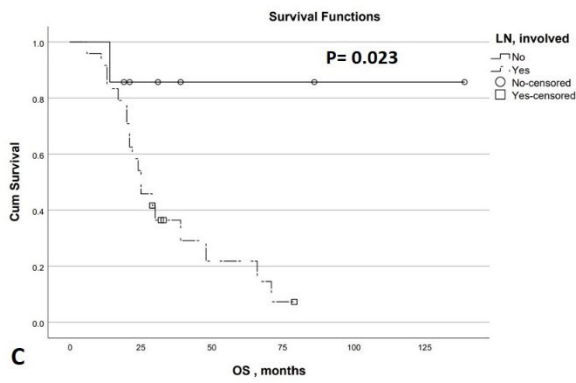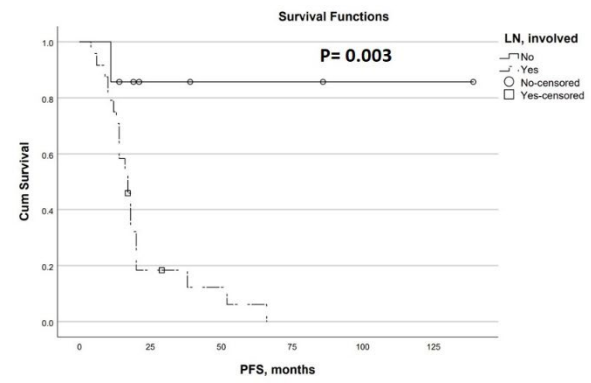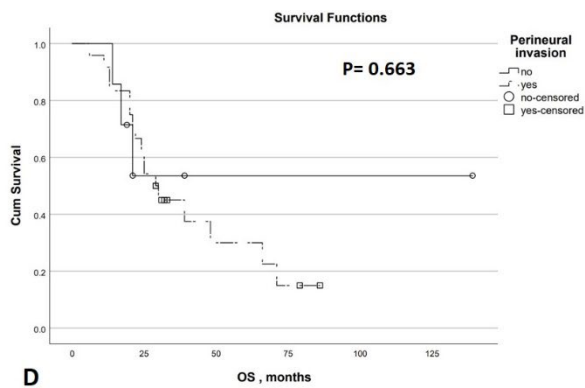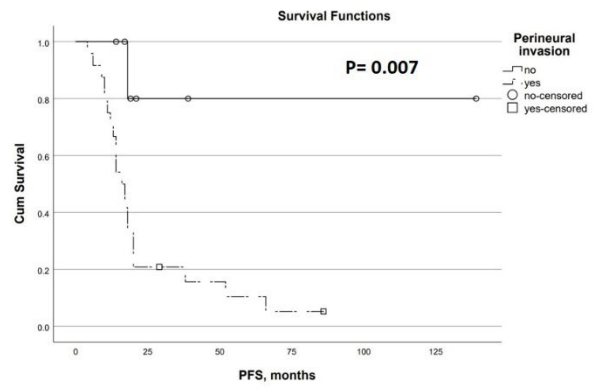

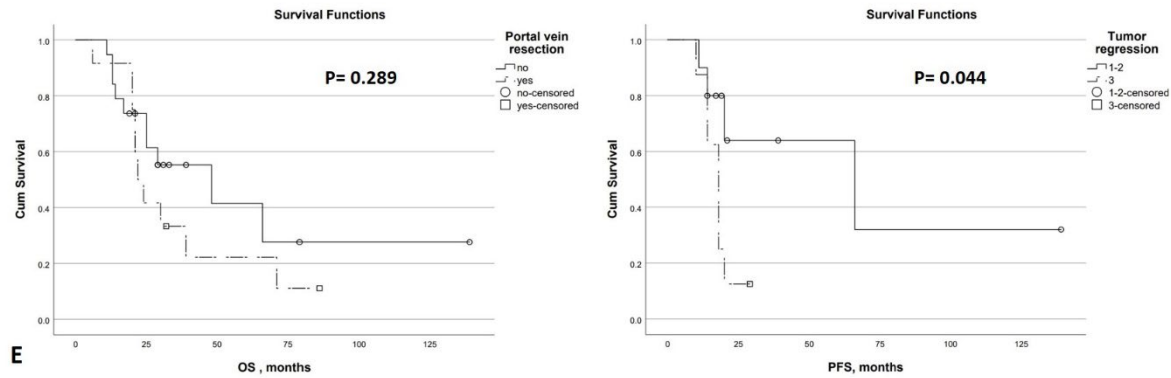

**Figure S1.** Significant and possibly significant predictors of progression-free and overall survival for PDAC. A, RFS and OS for neoadjuvant chemotherapy. B, RFS and OS for preoperative CA19-9. C, RFS and OS for lymph node involvement, D, RFS and OS for perineural invasion, E, PFS for tumor regression score and OS for concomitant PV/SMV resection.

Gender, body mass index, age, tumor size, morbidity, concomitant resection of one hepatic artery and portal vein did not influence overall and progression-free survival.

In the case of neoadjuvant chemotherapy, overall and progression-free survival was 48 [95% CI:17; 42] and 20 [95% CI:16; 24] months, respectively. If neoadjuvant chemotherapy was not used, these values were 25 [95% CI:13; 37] and 16 [95% CI:12; 20] months, respectively. Neoadjuvant chemotherapy was associated with increased overall and progression-free survival, although the improvement was insignificant (Fig. 1Sa)

Preoperative CA 19-9 level <66 U/mL was accompanied by higher PFS and OS:(20 [95% CI: 18; 22] and 16 [95% CI: 13; 19] months, and 48 [95% CI: 13; 83] and 22 [95% CI: 18; 26] months) respectively (Fig. 1Sb).

Lymph node invasion significantly reduced overall and progression-free survival (25 [95% CI: 17;34] and 17 [95% CI: 14;20] months, respectively), in N<sub>0</sub>-patients median survival was not achieved for both overall and progression-free survival (Fig. 1Sc).

Perineural invasion significantly reduced progression-free (16 [95% CI: 13; 19] months) and overall survival (29 [95% CI: 22; 36] months). Median survival was not achieved for OS or PFS if the perineural invasion was absent (Fig. 1Sd)

The association of portal vein resection and tumor regression score is presented on Figure 1Se.
